# Supplementary material for: Palladium-catalyzed intermolecular fluoroesterification of styrenes: exploration and mechanistic insight
Source: Royal Society of Chemistry journal article supplement (doi:10.1039/c3sc50690h), 2013-01-01

## Supporting Information

for

### **Palladium-Catalyzed Intermolecular Fluoroesterification of Styrenes:**

#### **Exploration and Mechanistic Insight**

Haihui Peng, Zheliang Yuan, Hao-yang Wang, Yin-Long Guo and Guosheng Liu\*

*State Key Laboratory of Organometallics Chemistry, and Shanghai Mass Spectrometry Center,*

*Shanghai Institute of Organic Chemistry, Chinese Academy of Sciences, 354 Fenglin Road,*

*Shanghai, China, 200032.*

Email: [gliu@mail.sioc.ac.cn](mailto:gliu@mail.sioc.ac.cn)

#### **Characterization of New Compounds**

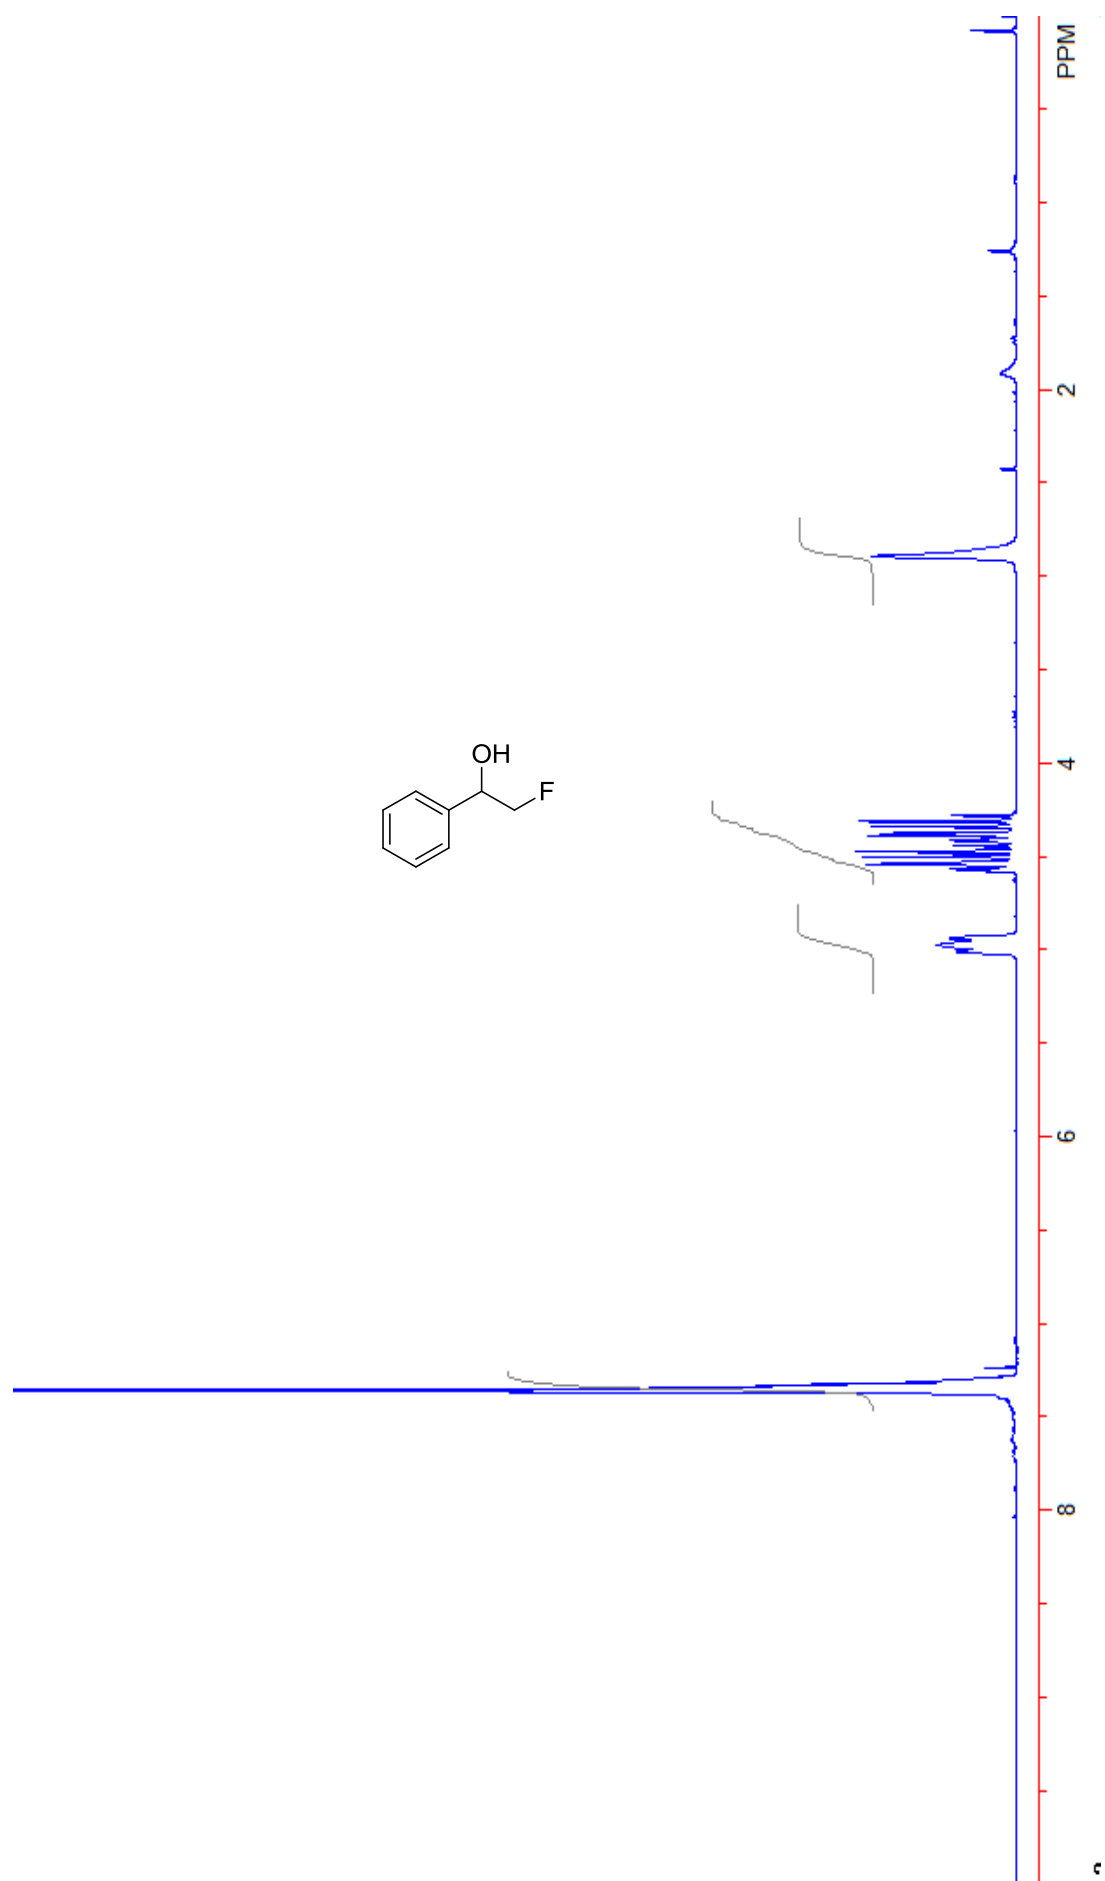

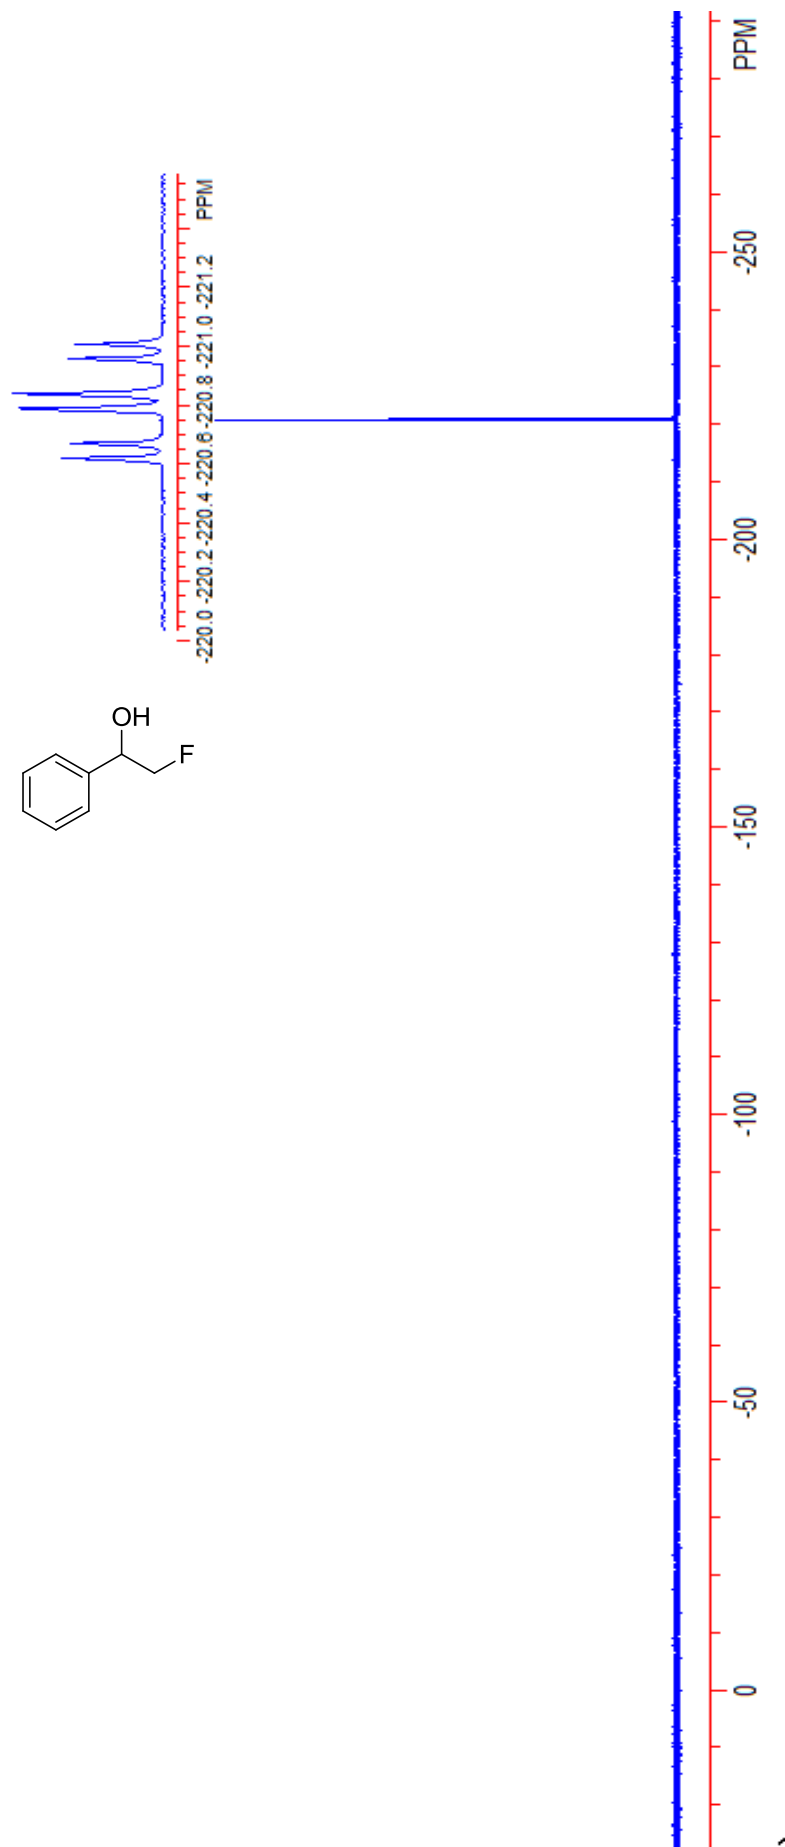

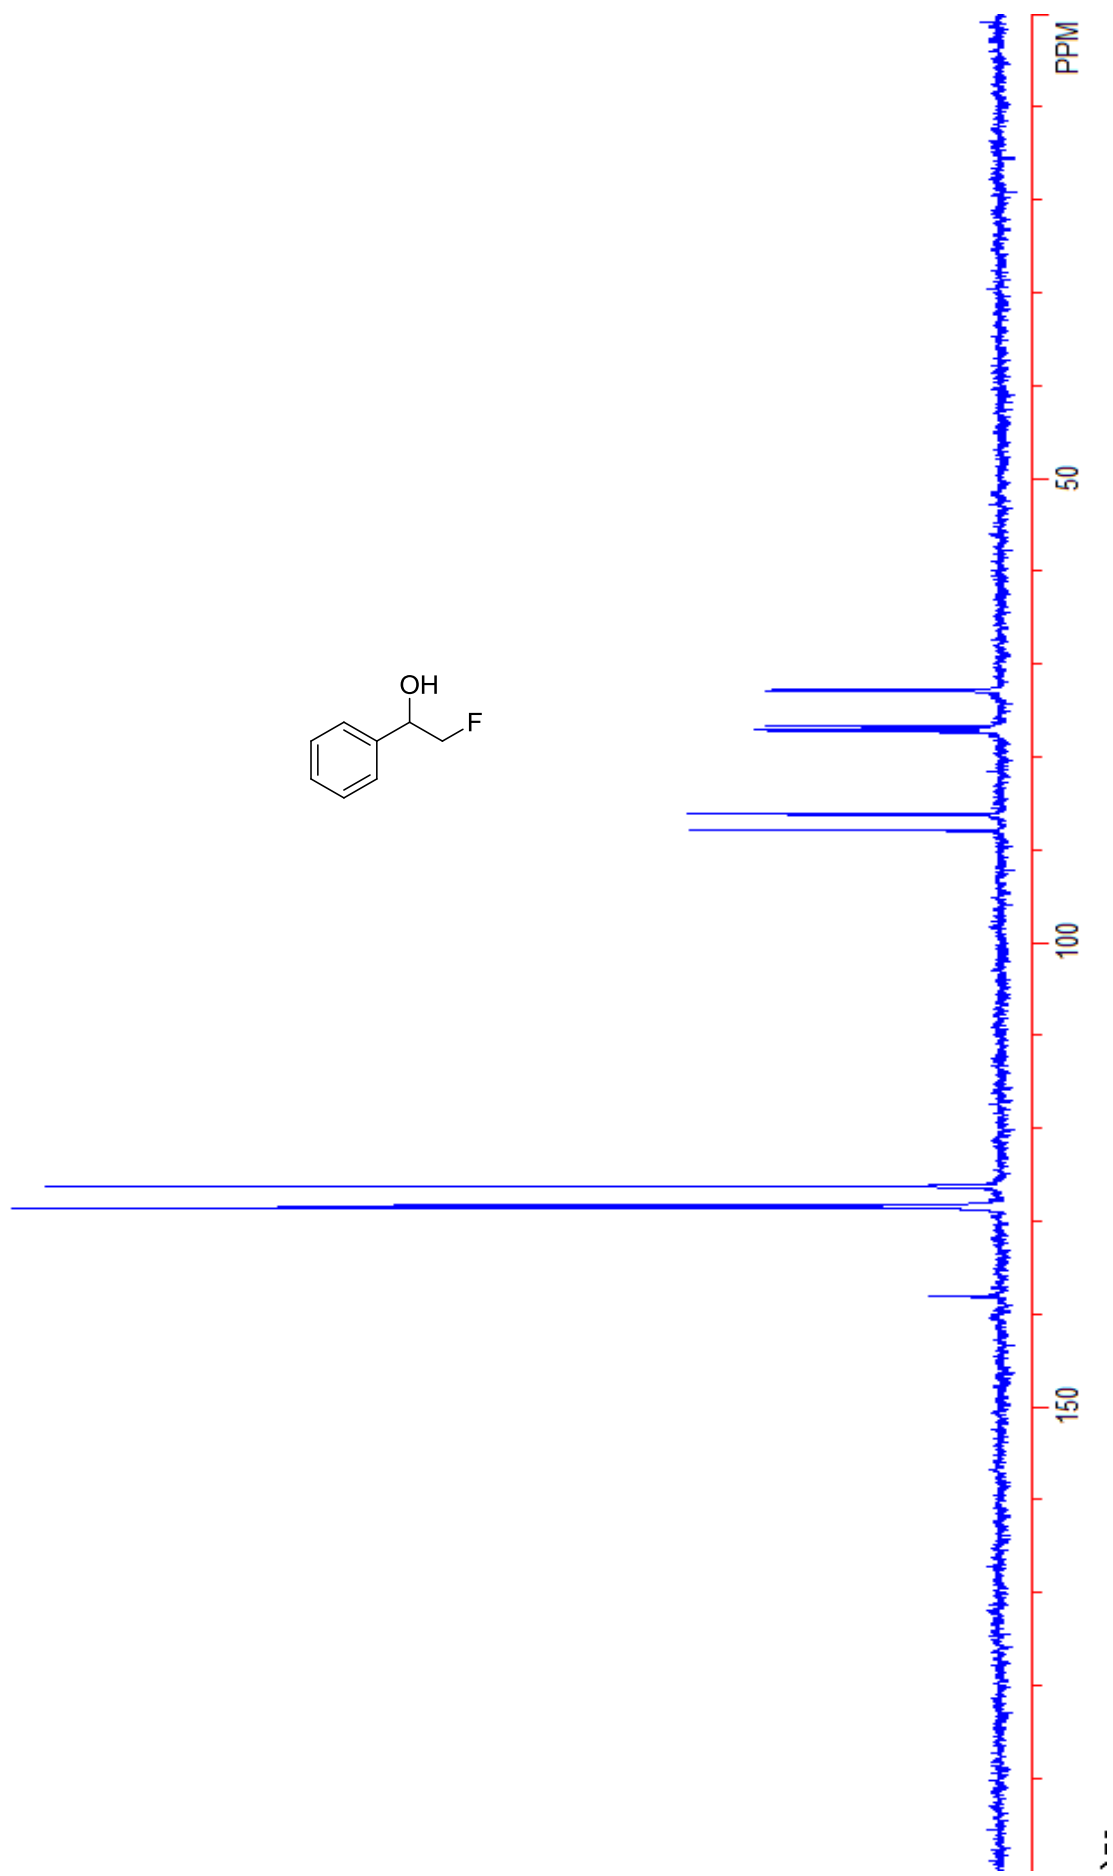

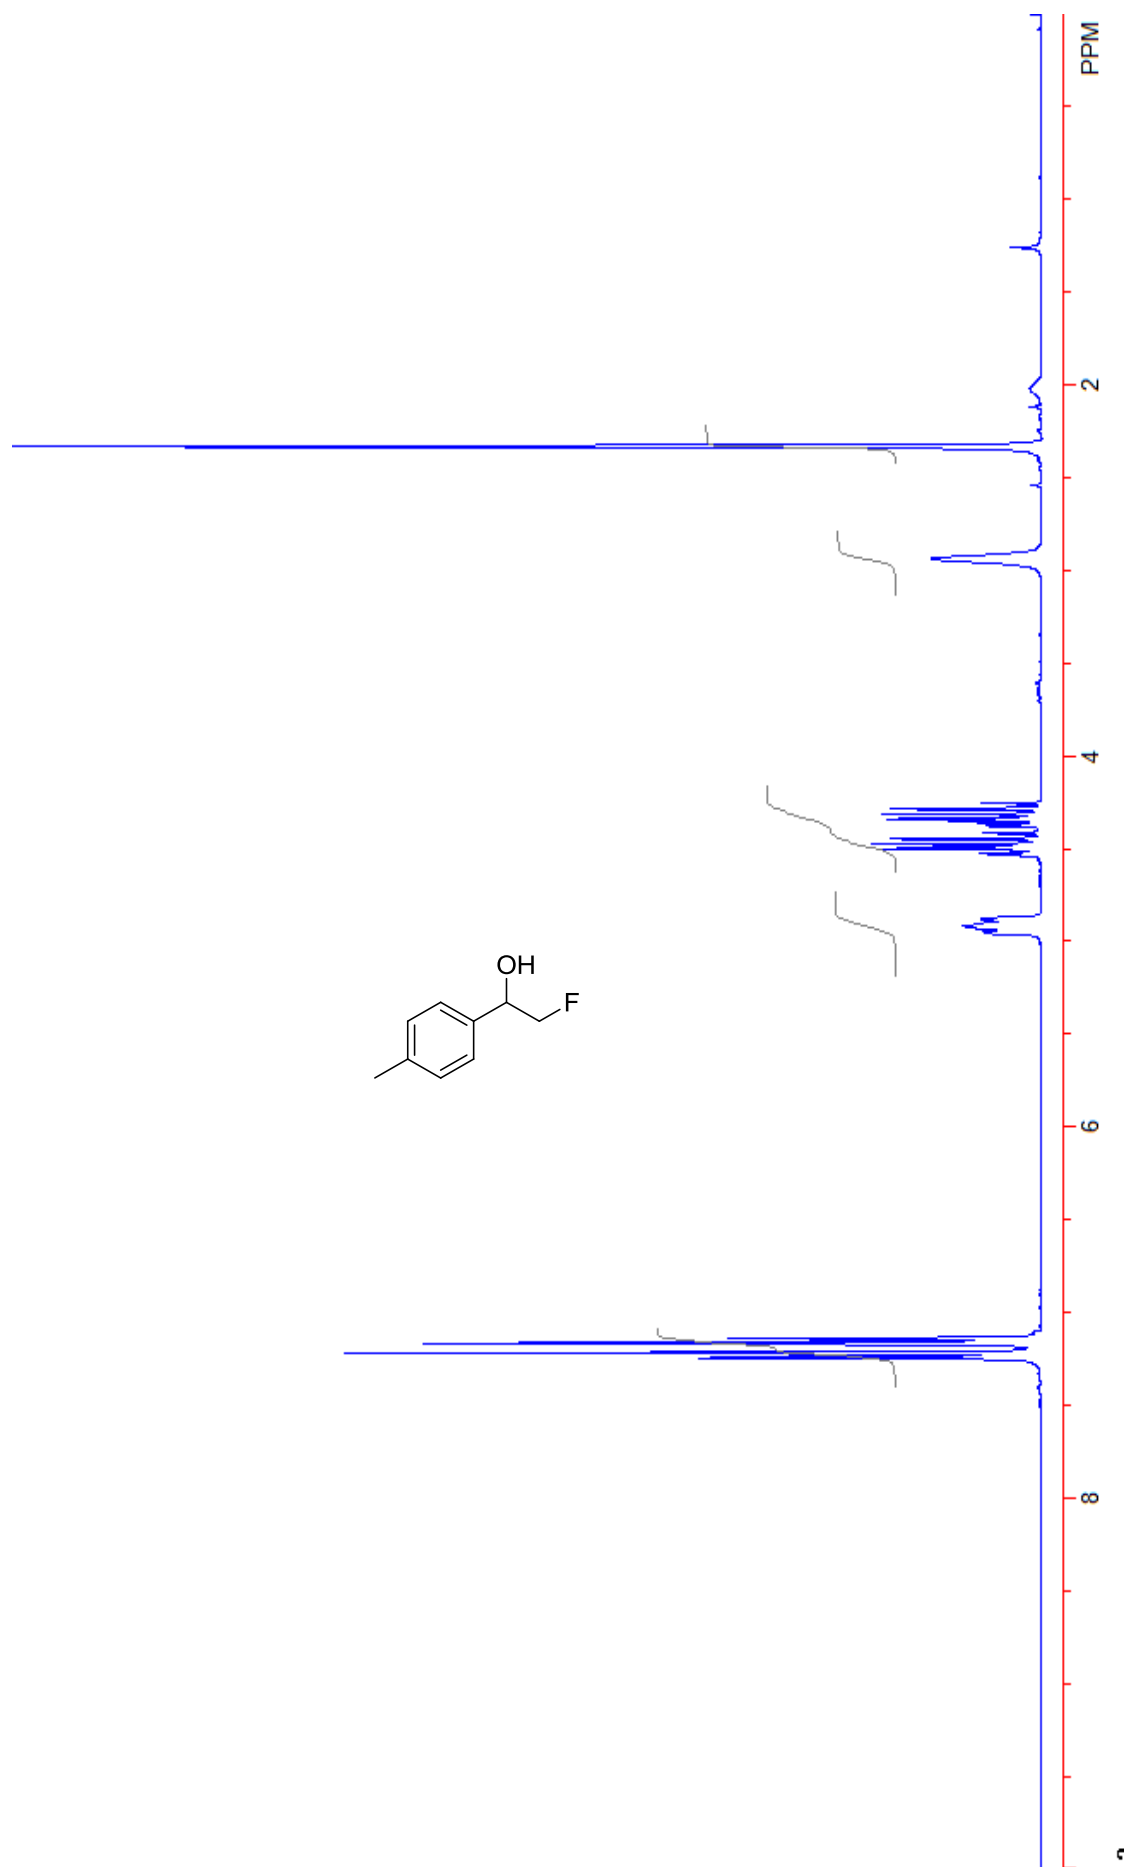

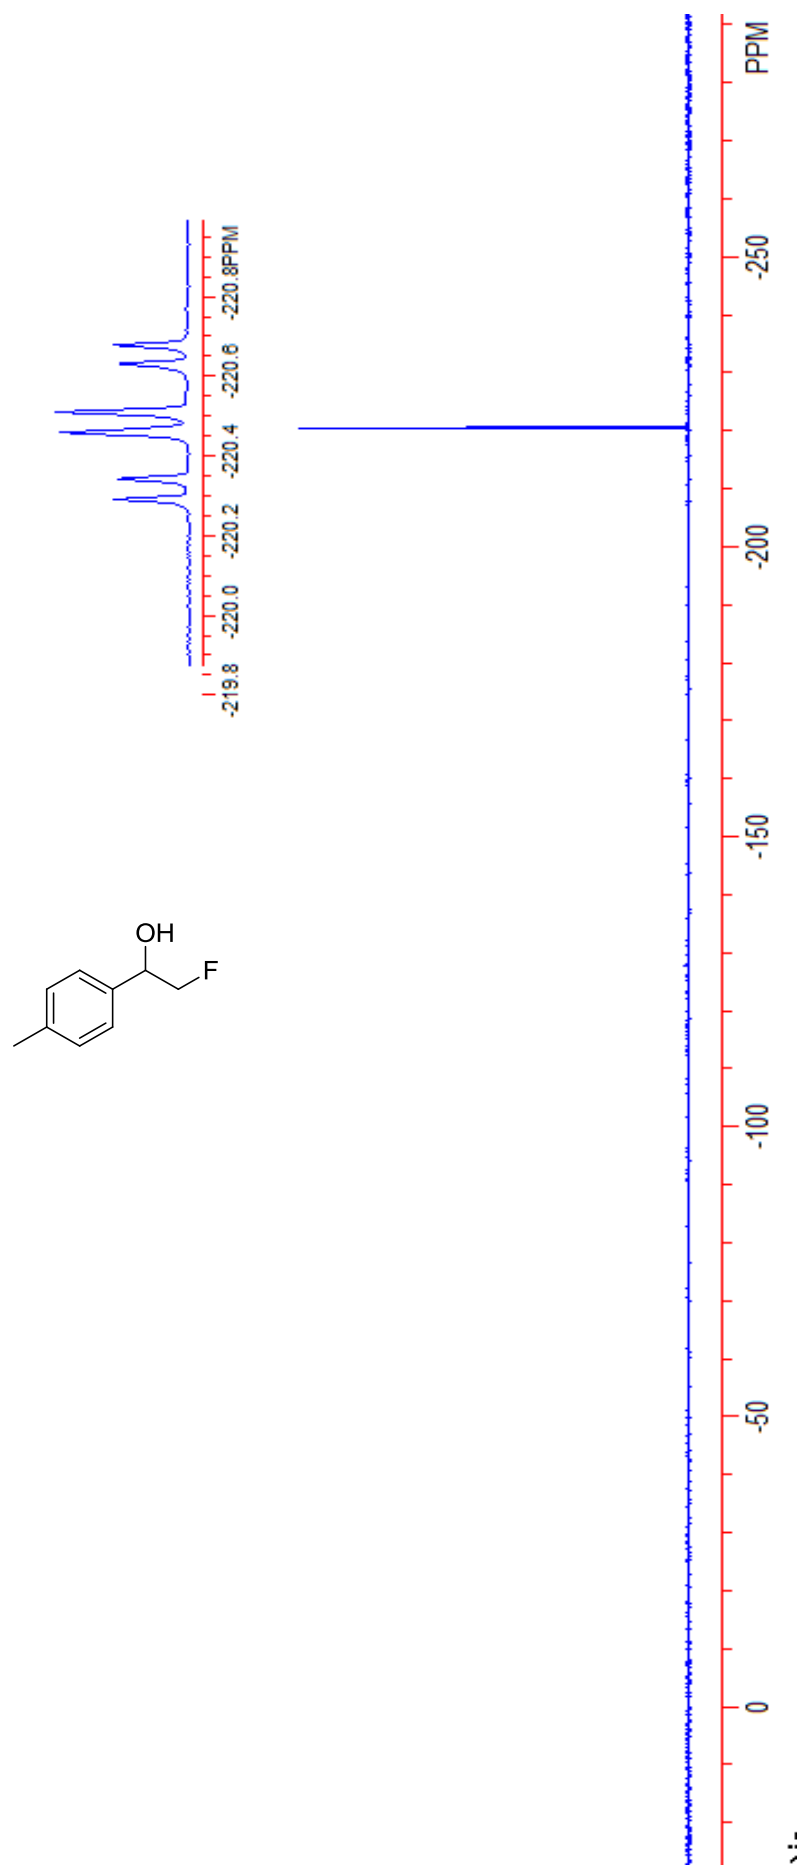

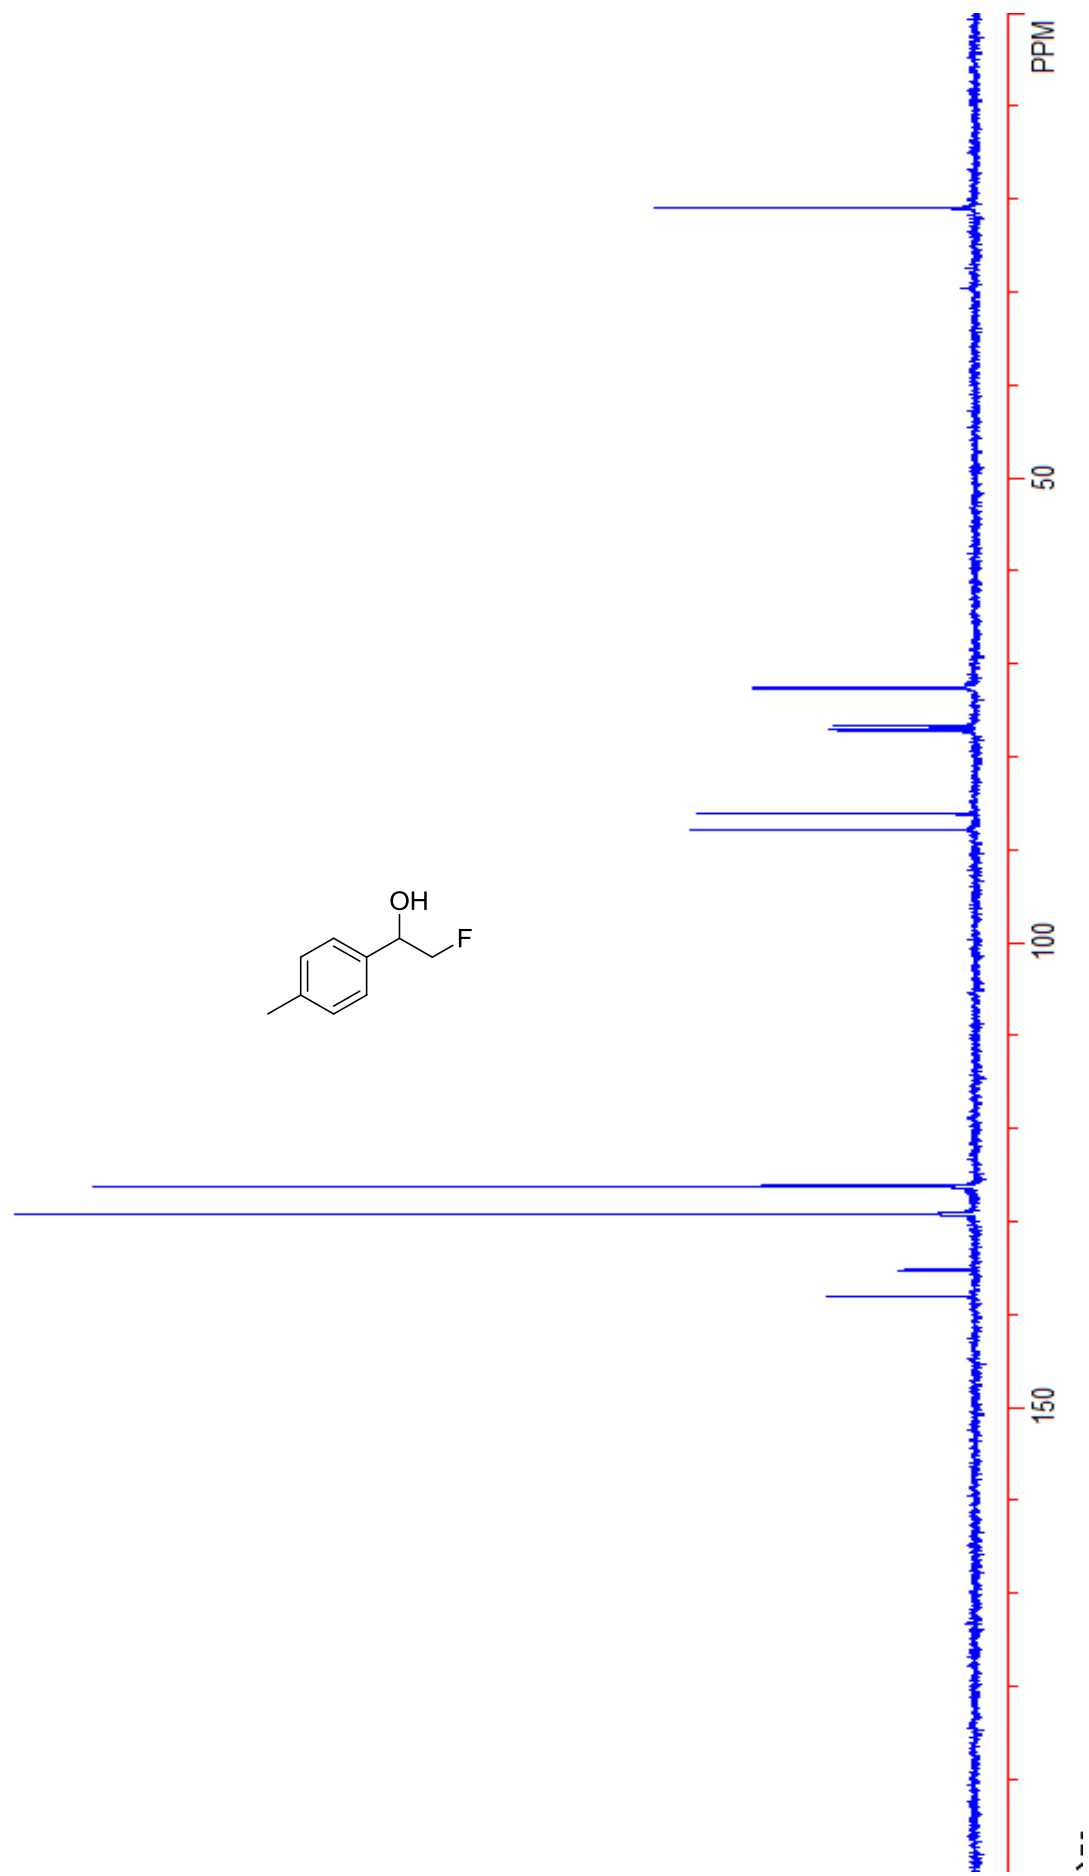

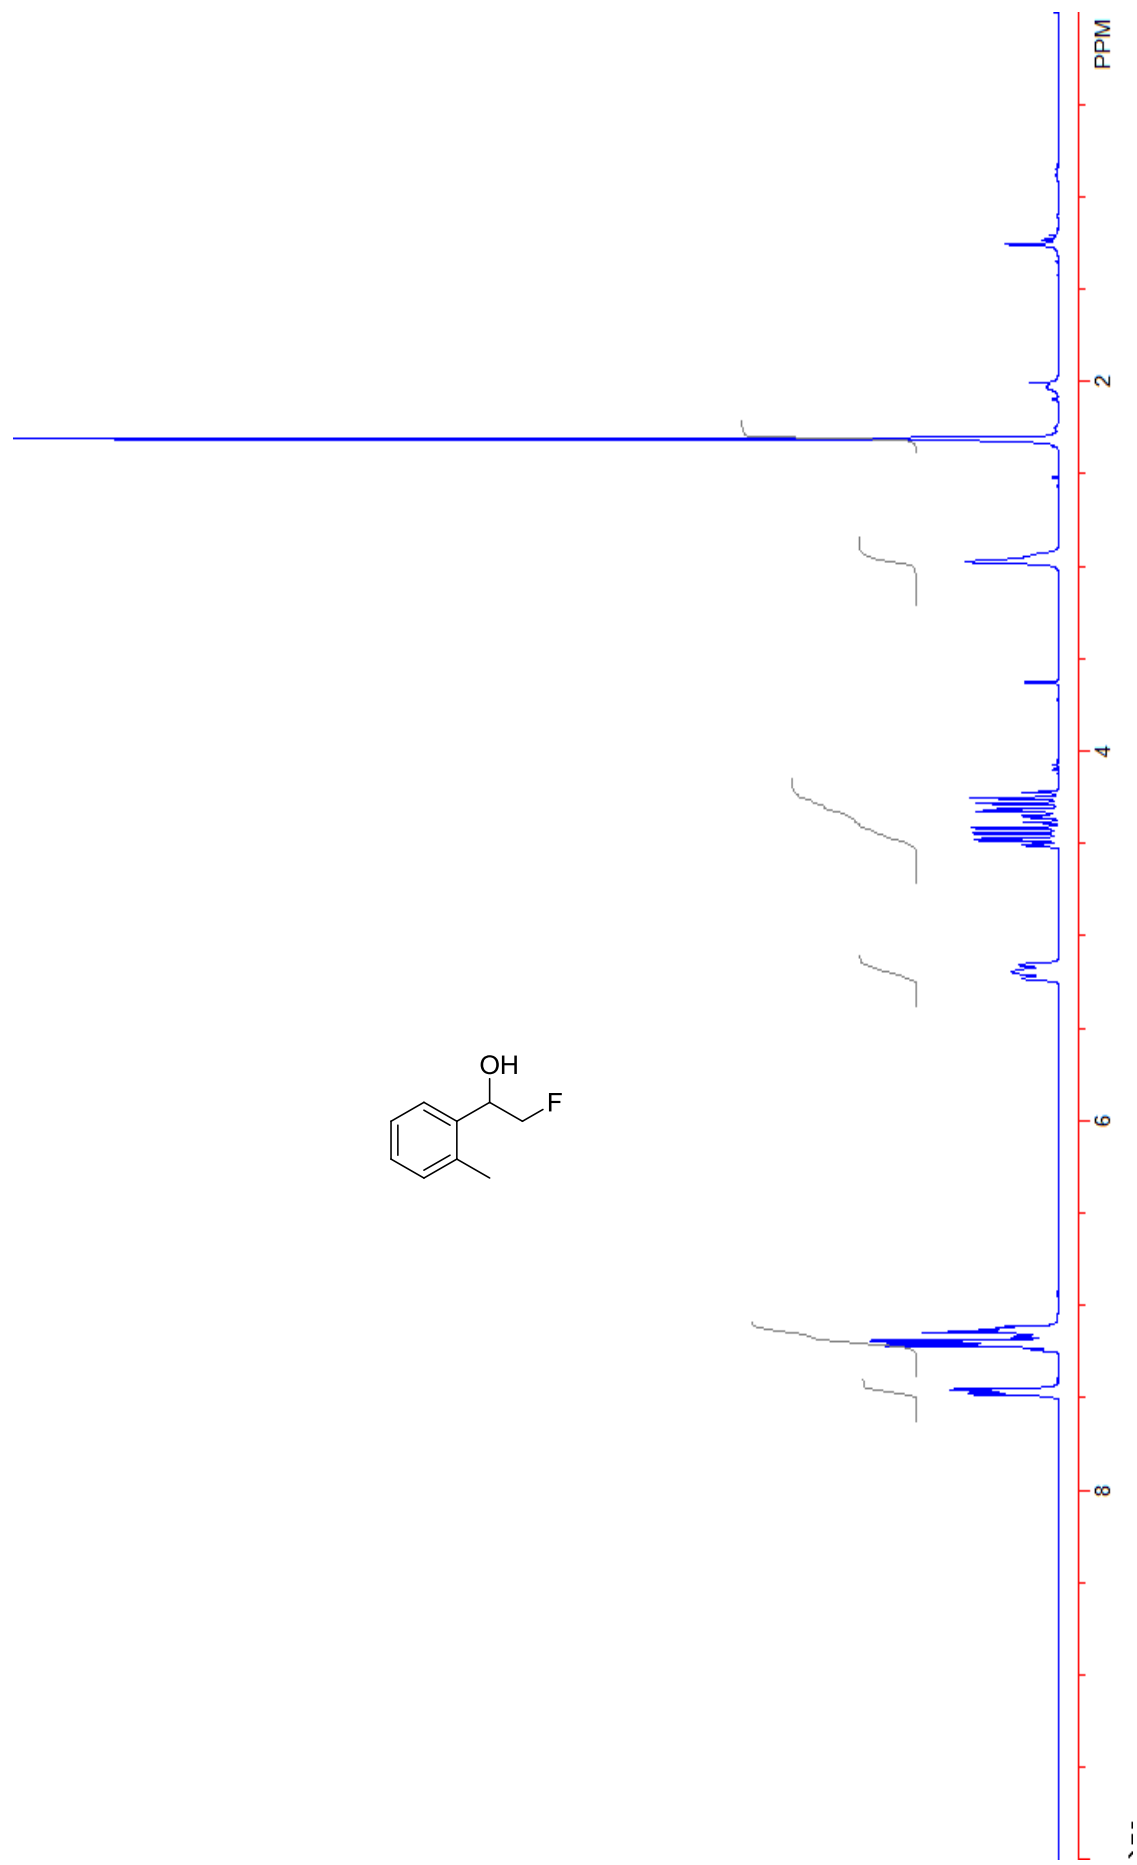



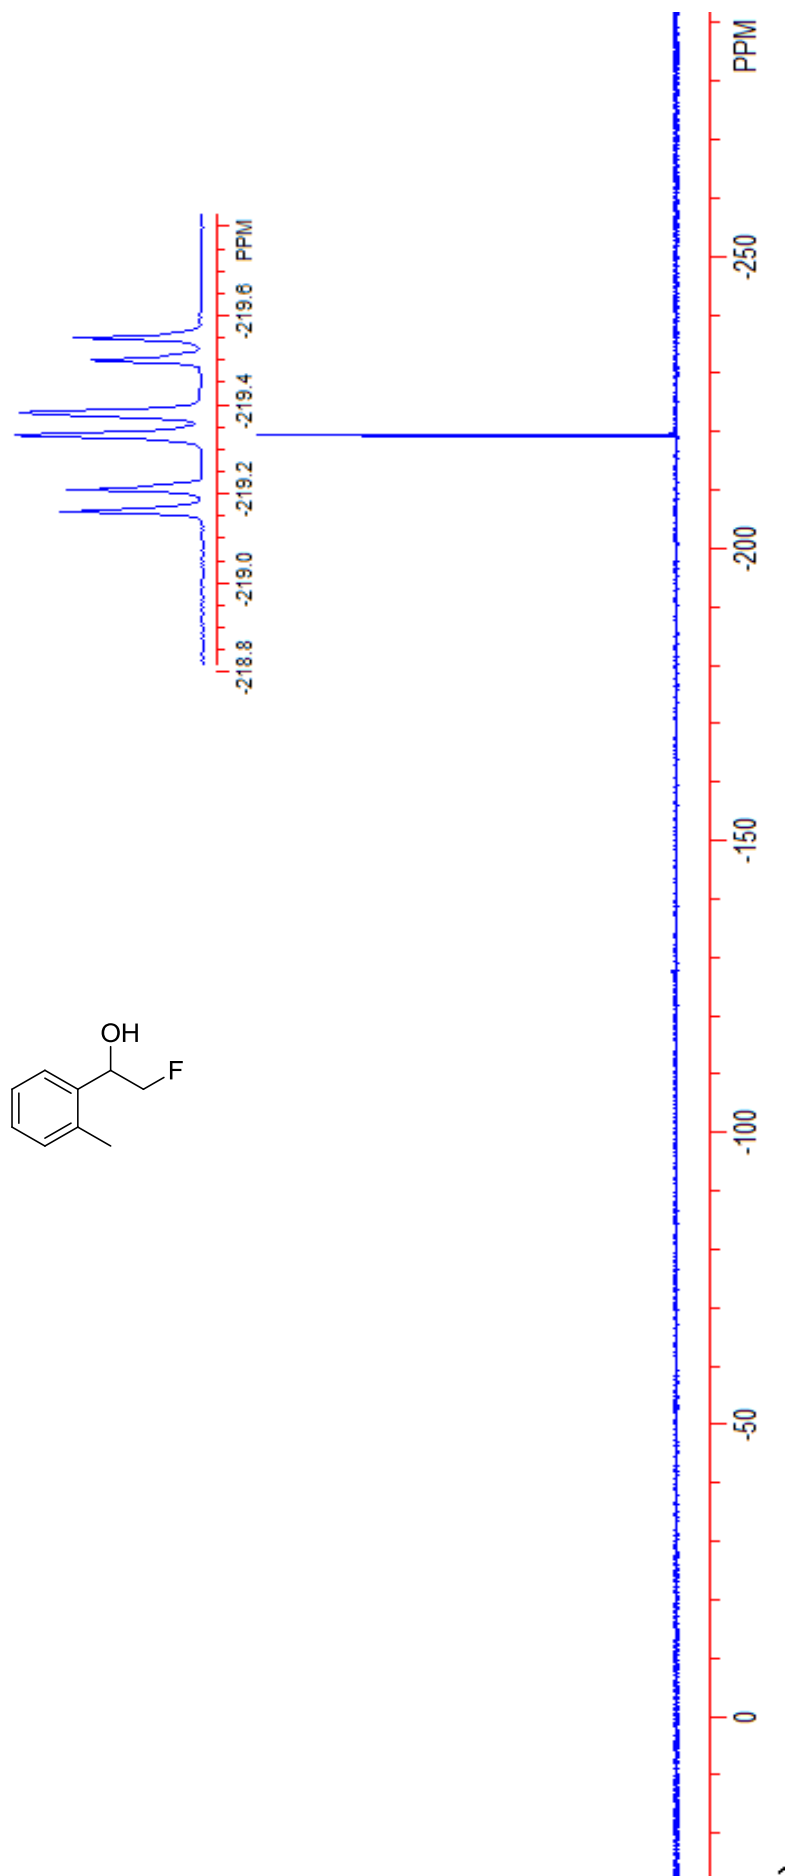

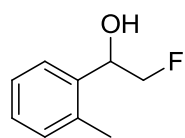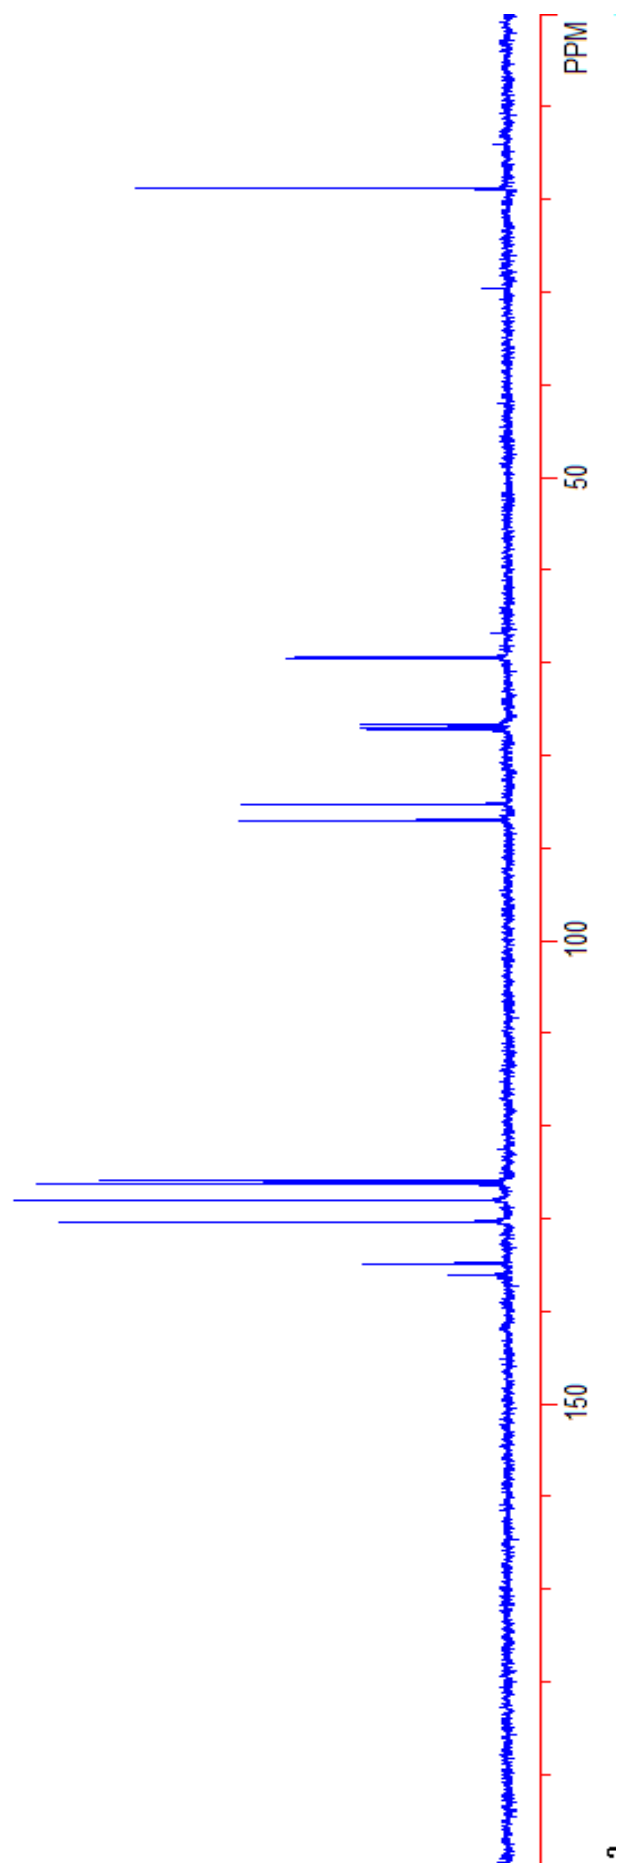

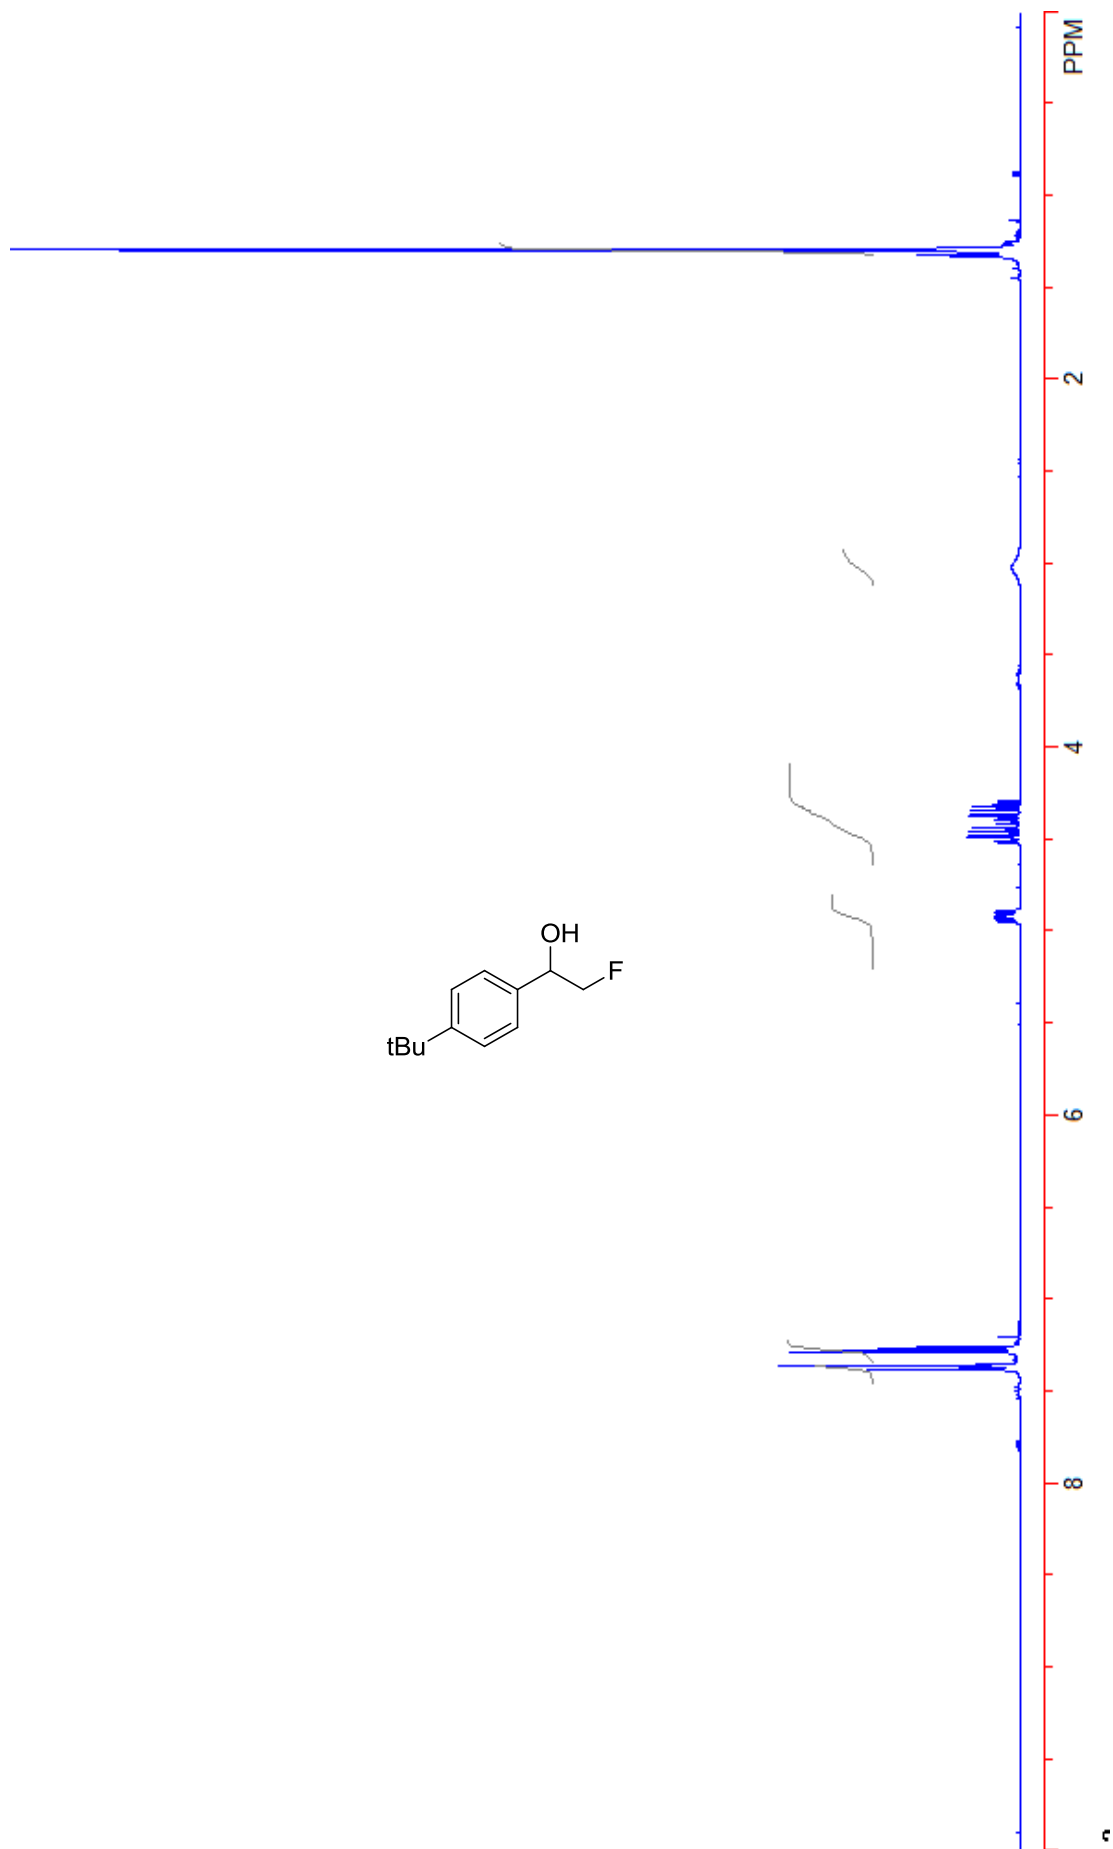

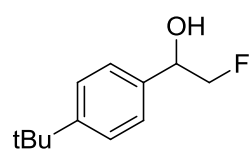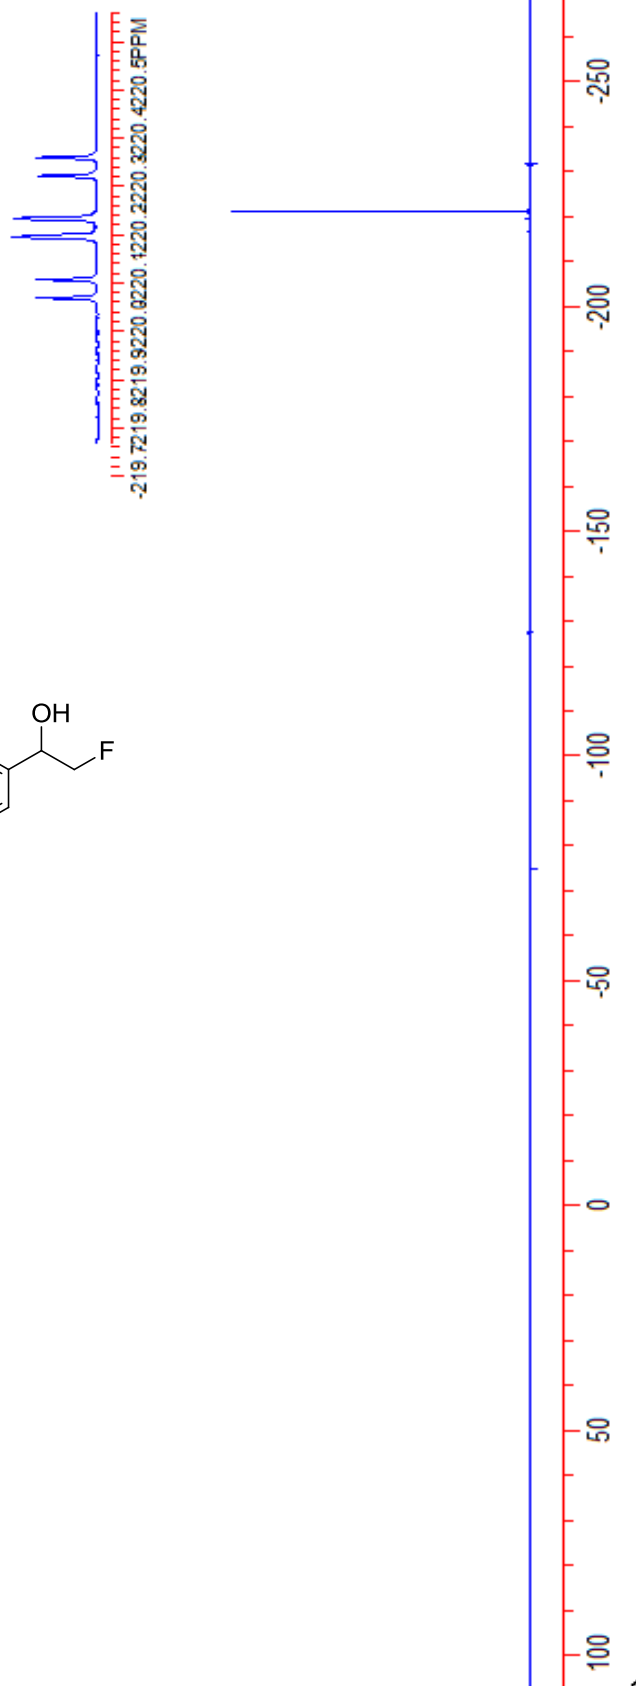

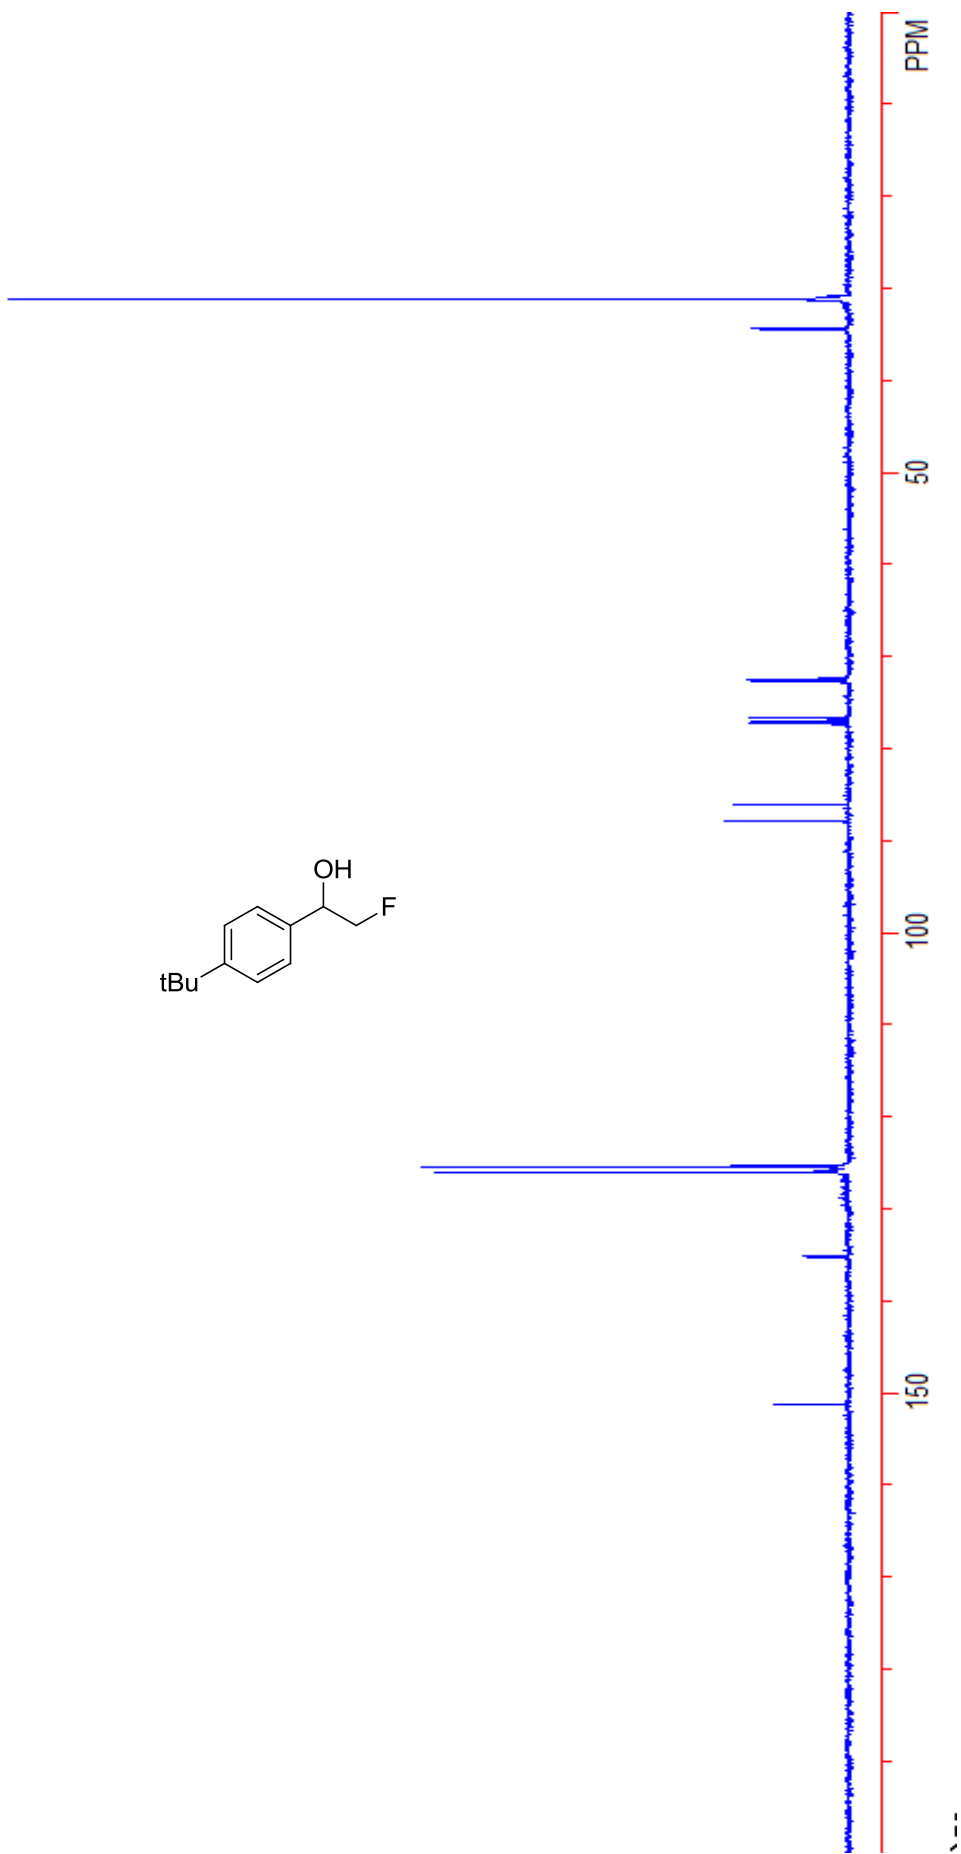

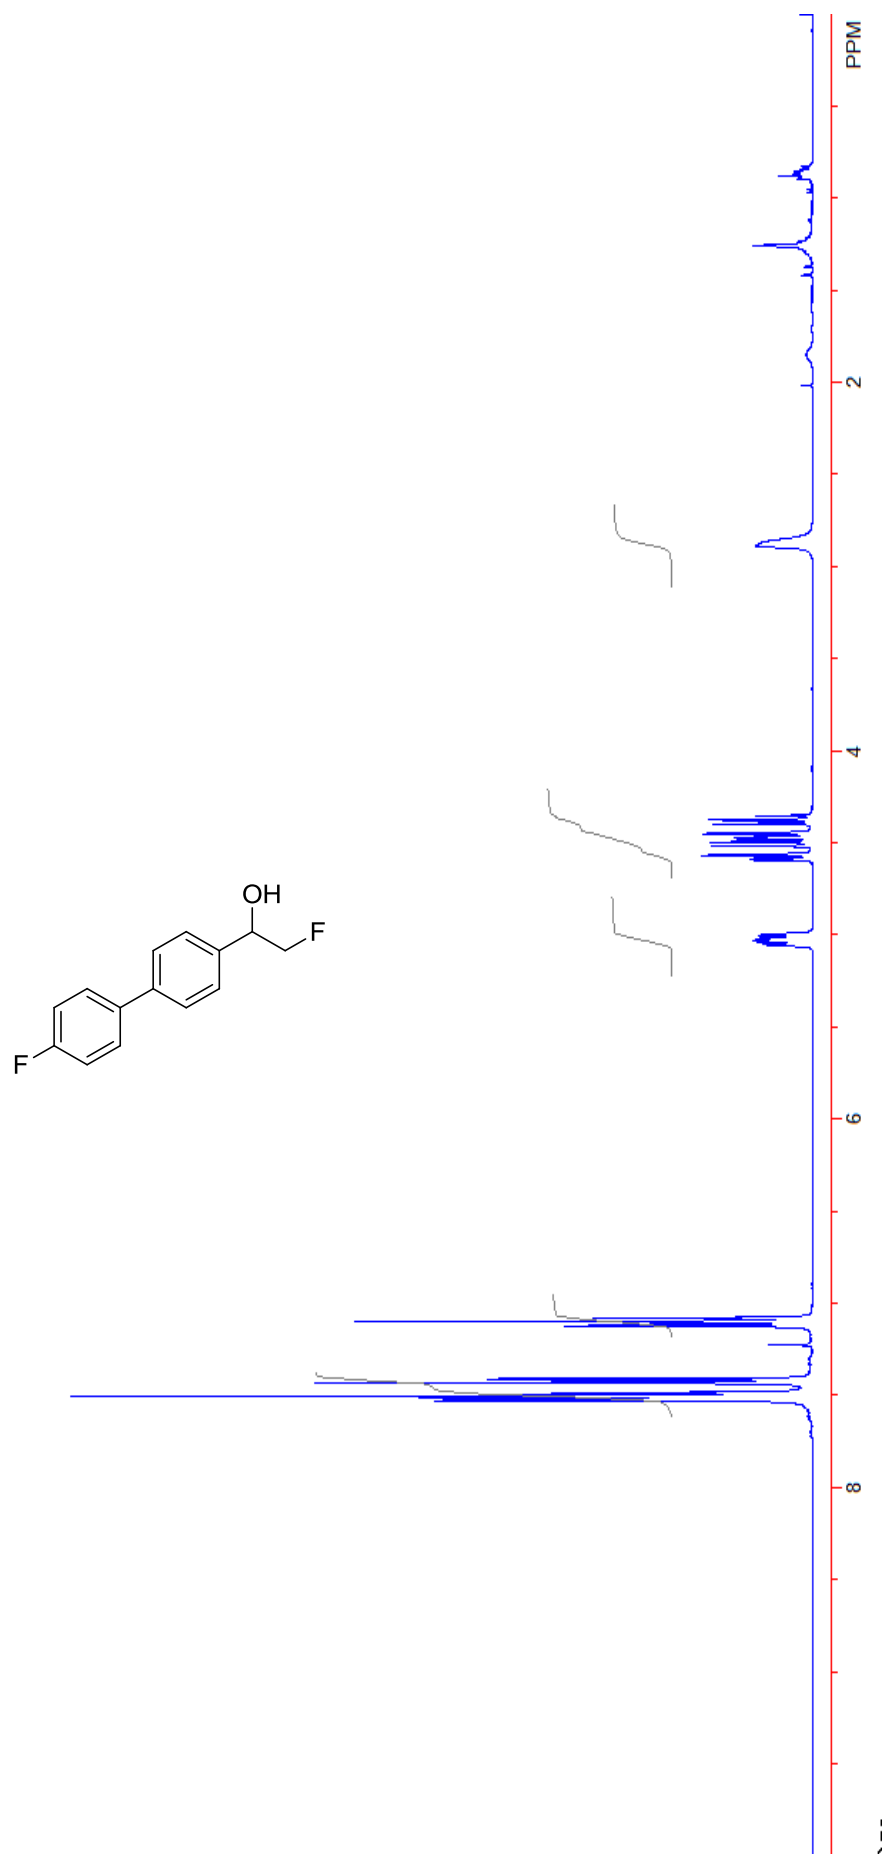

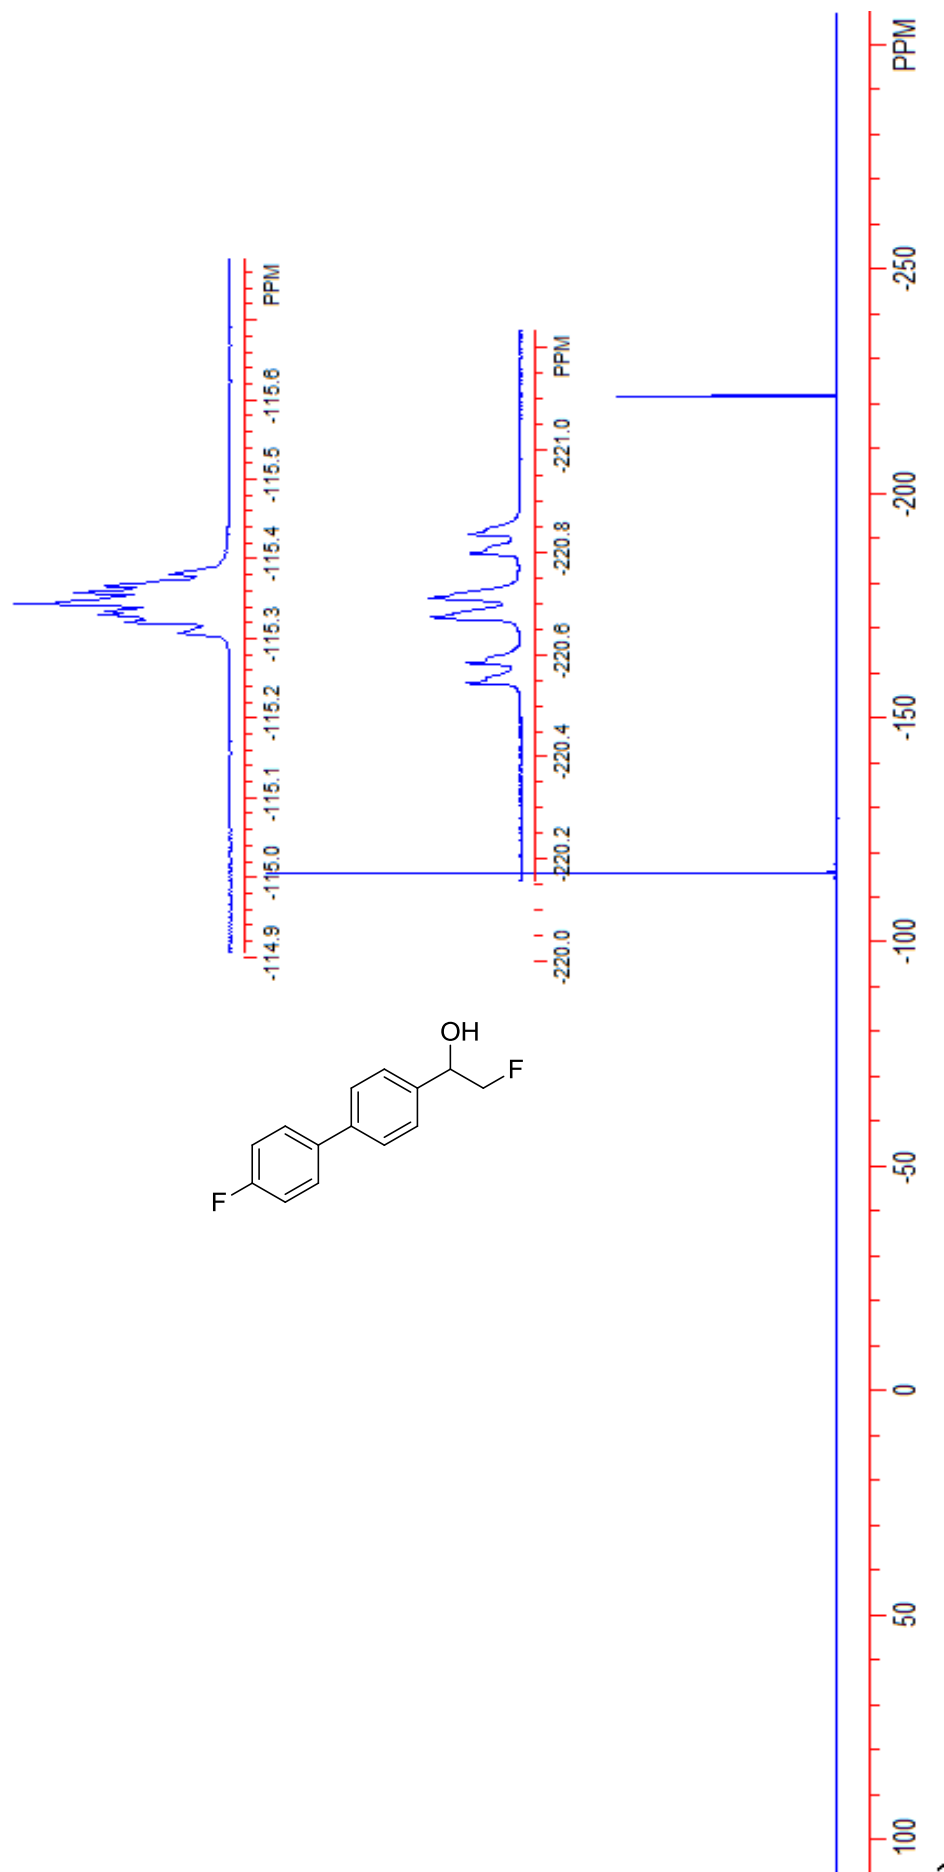

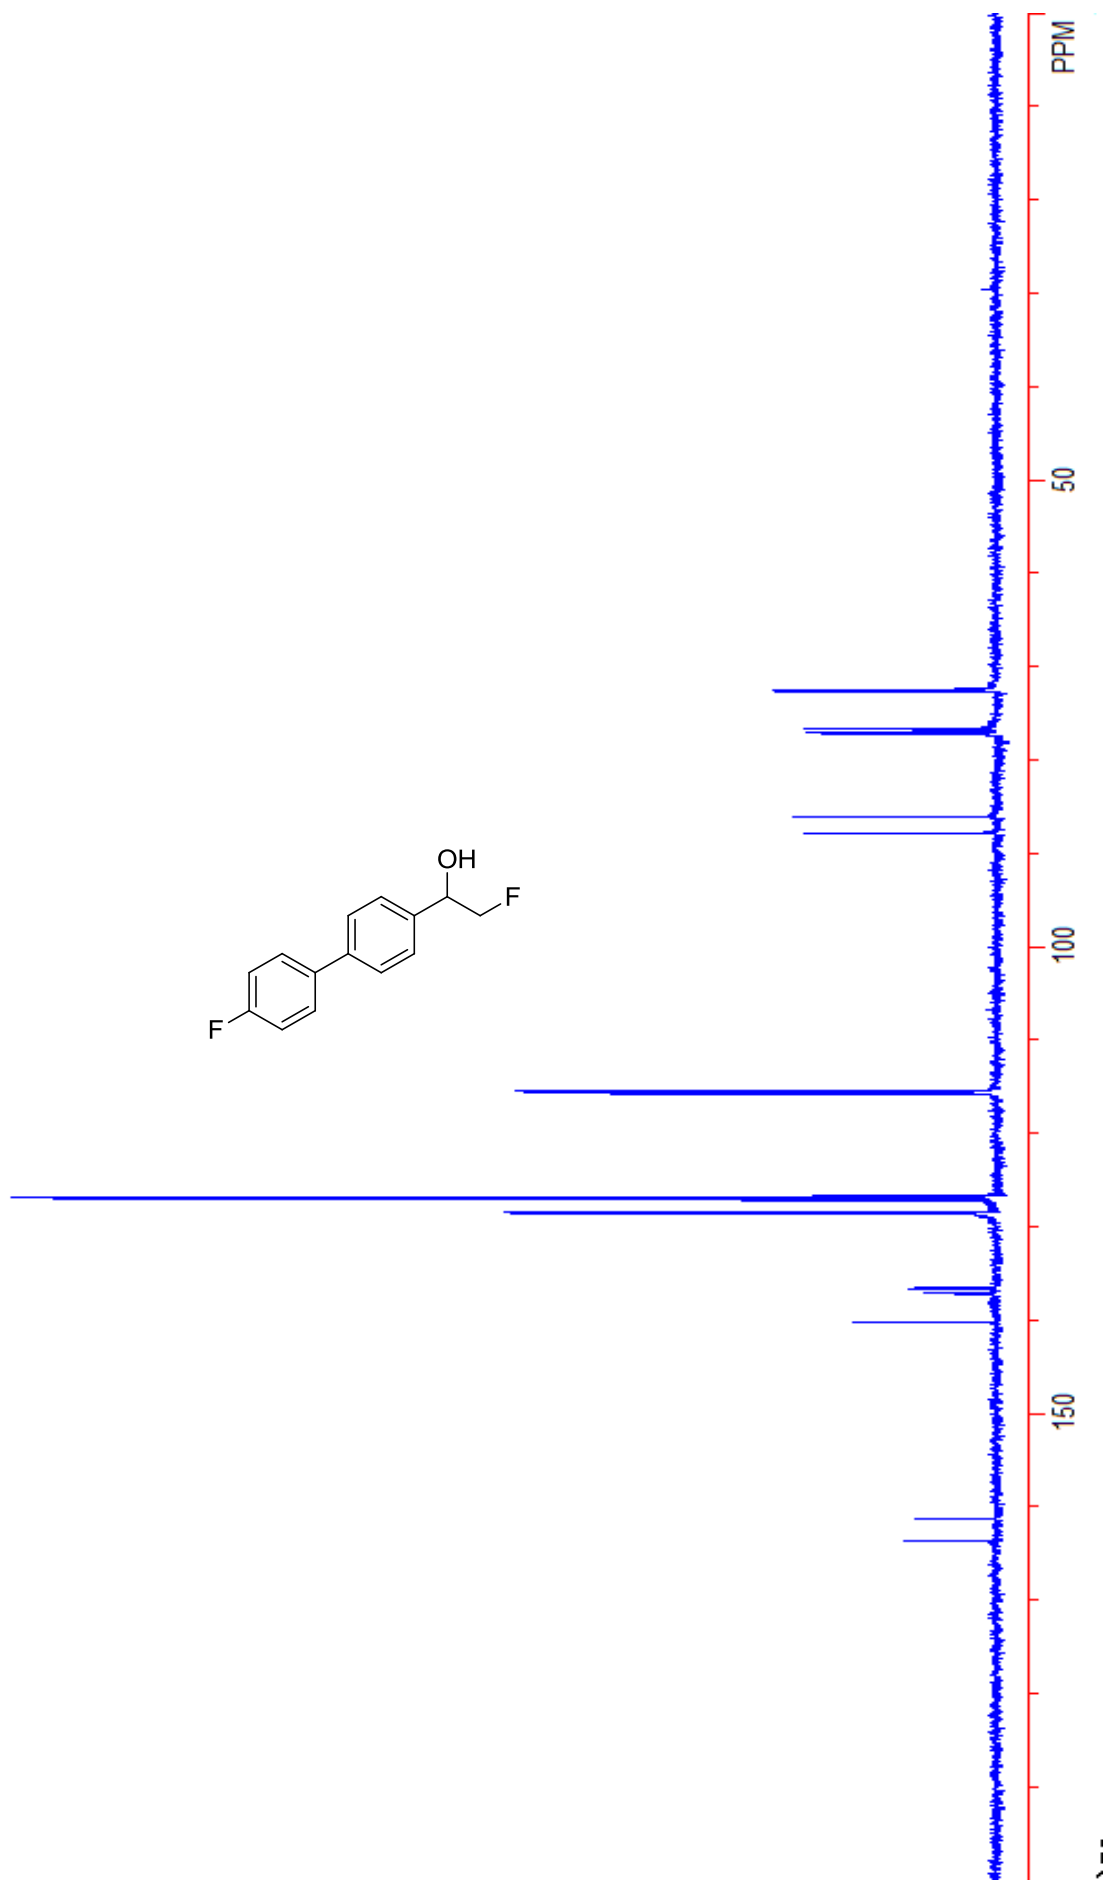



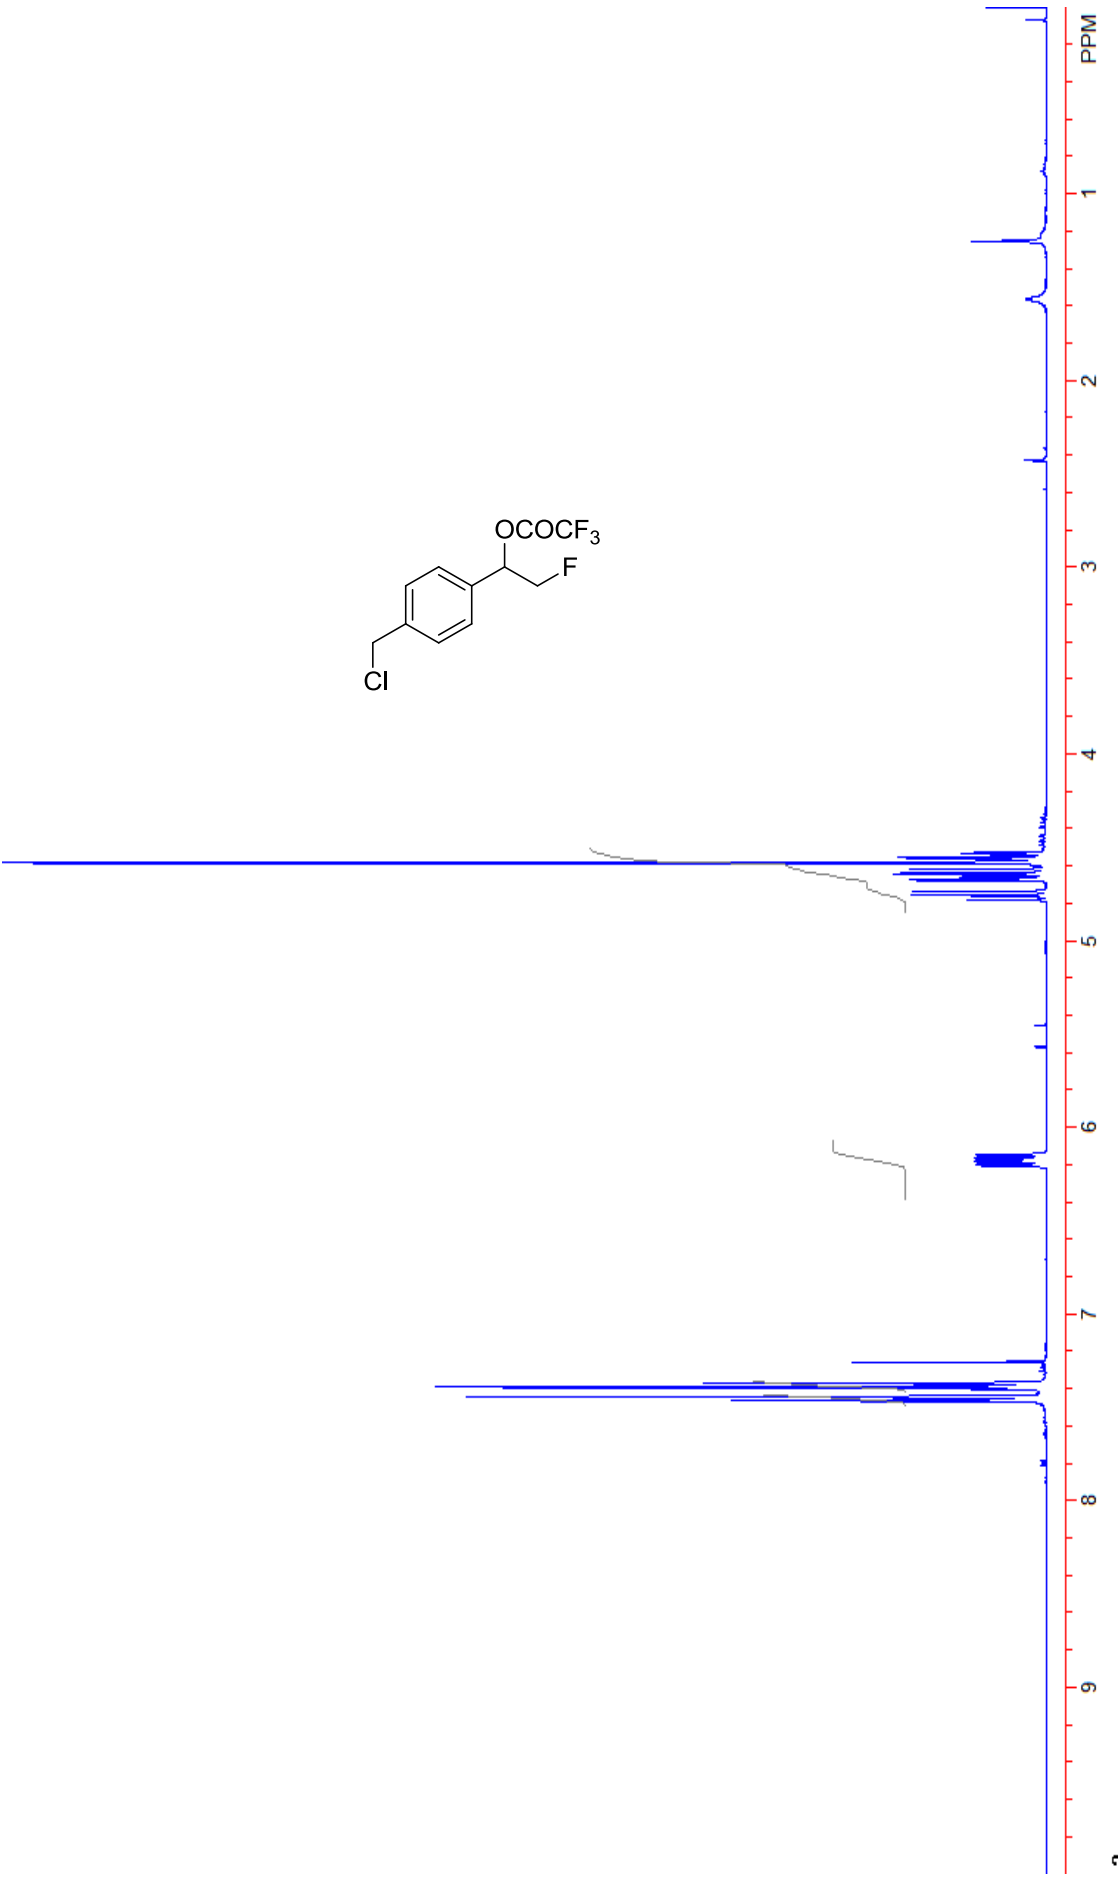

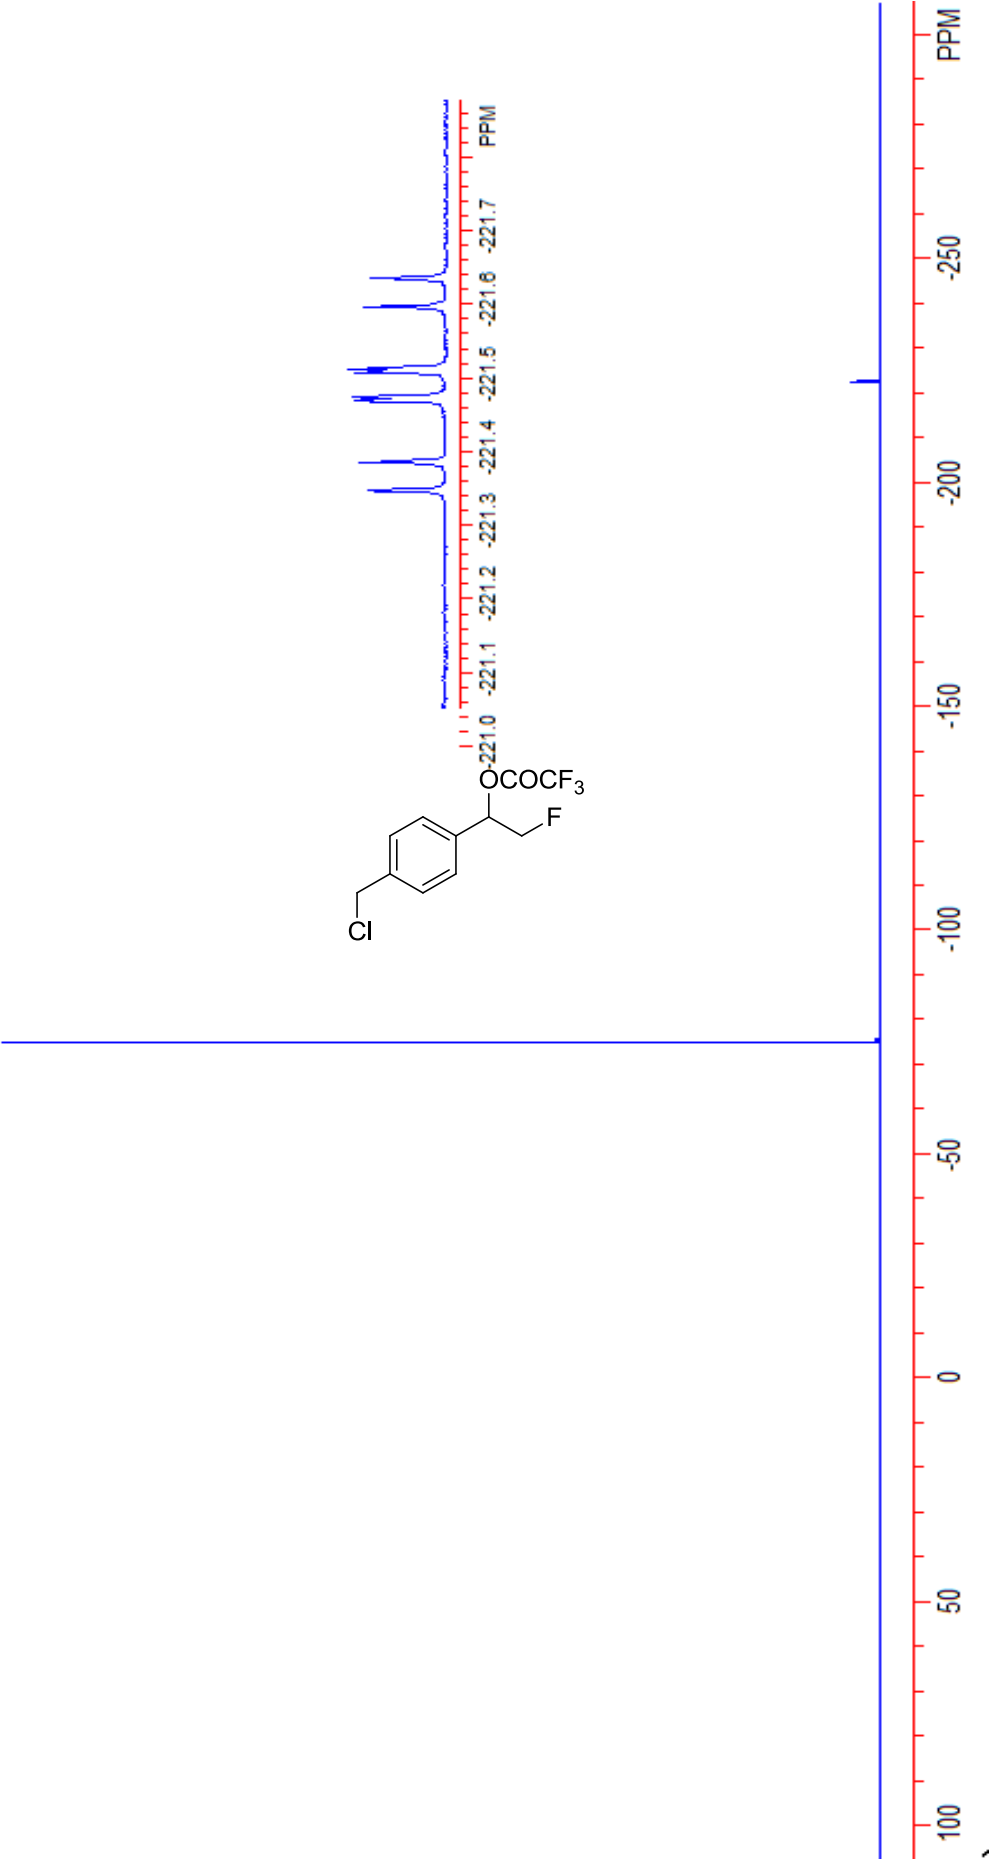

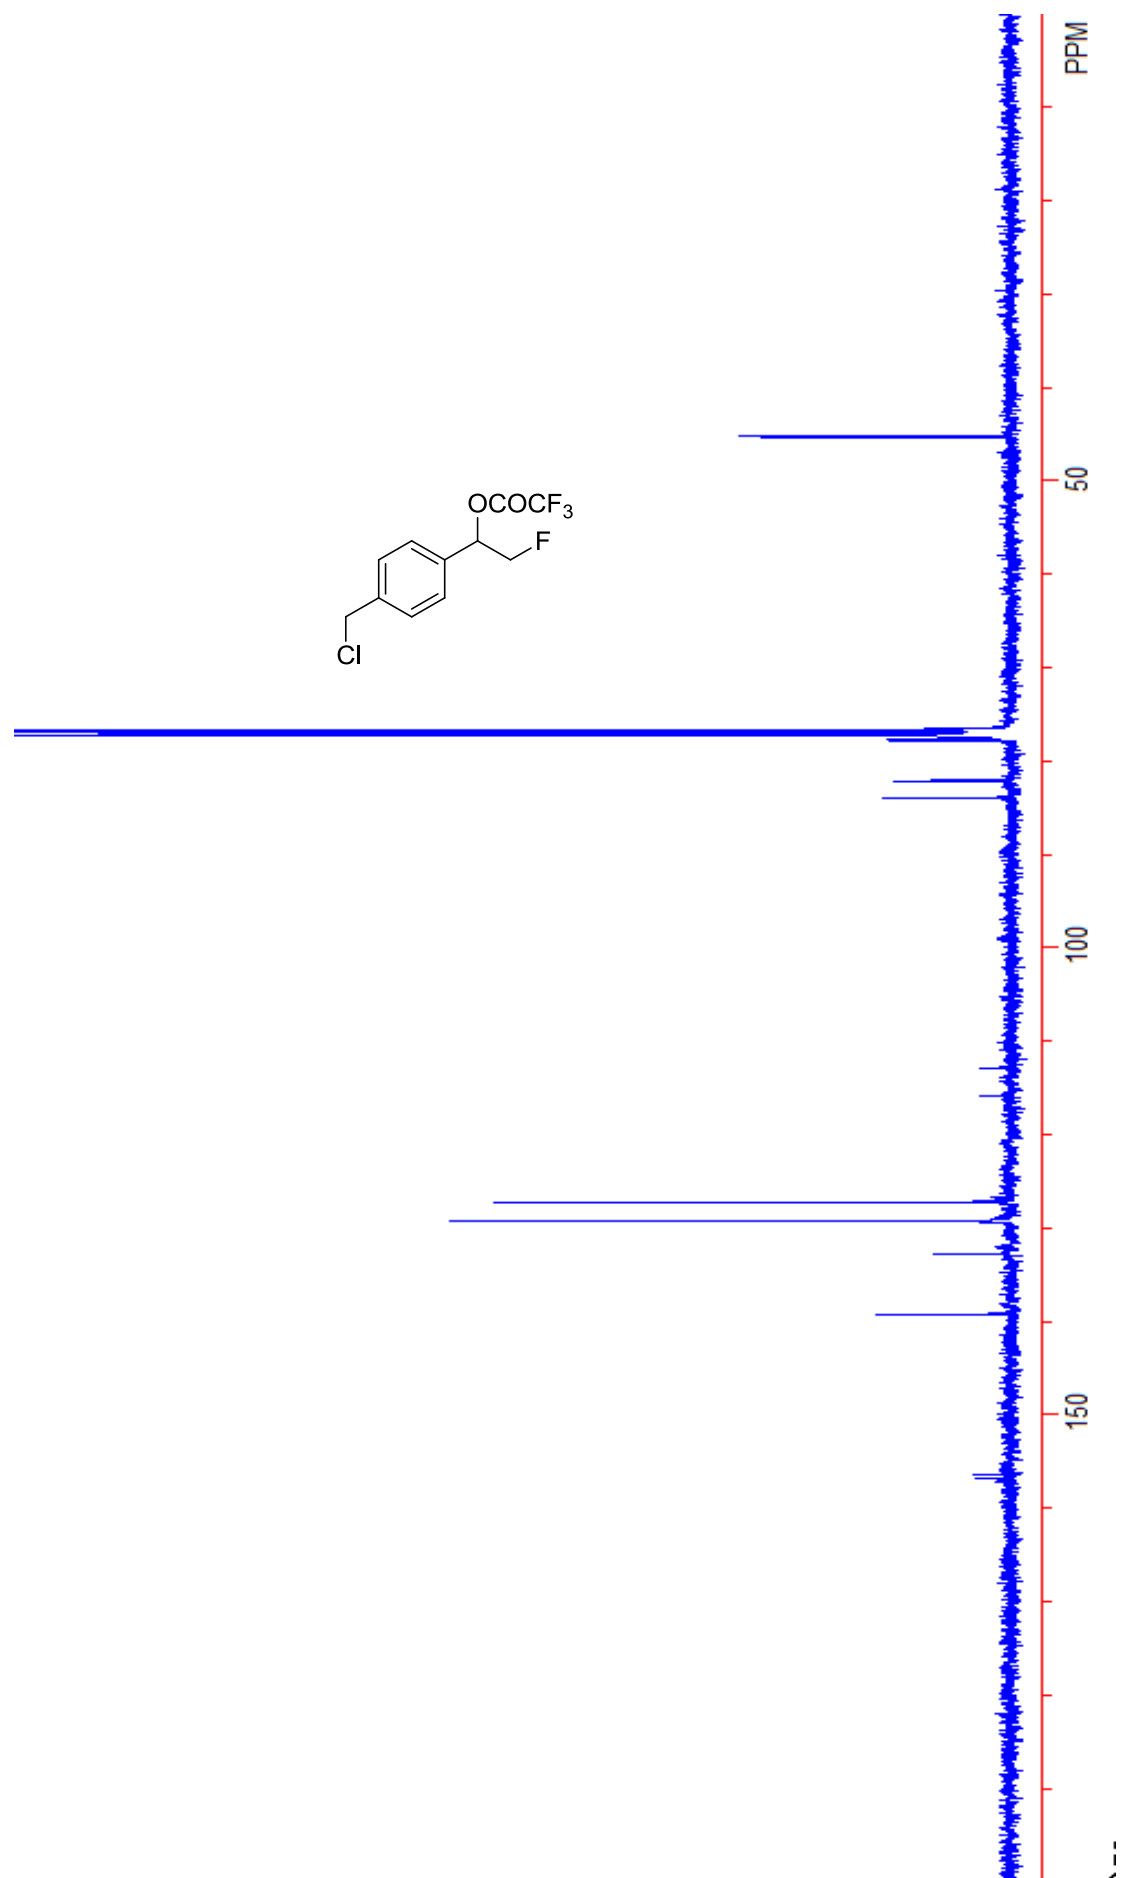

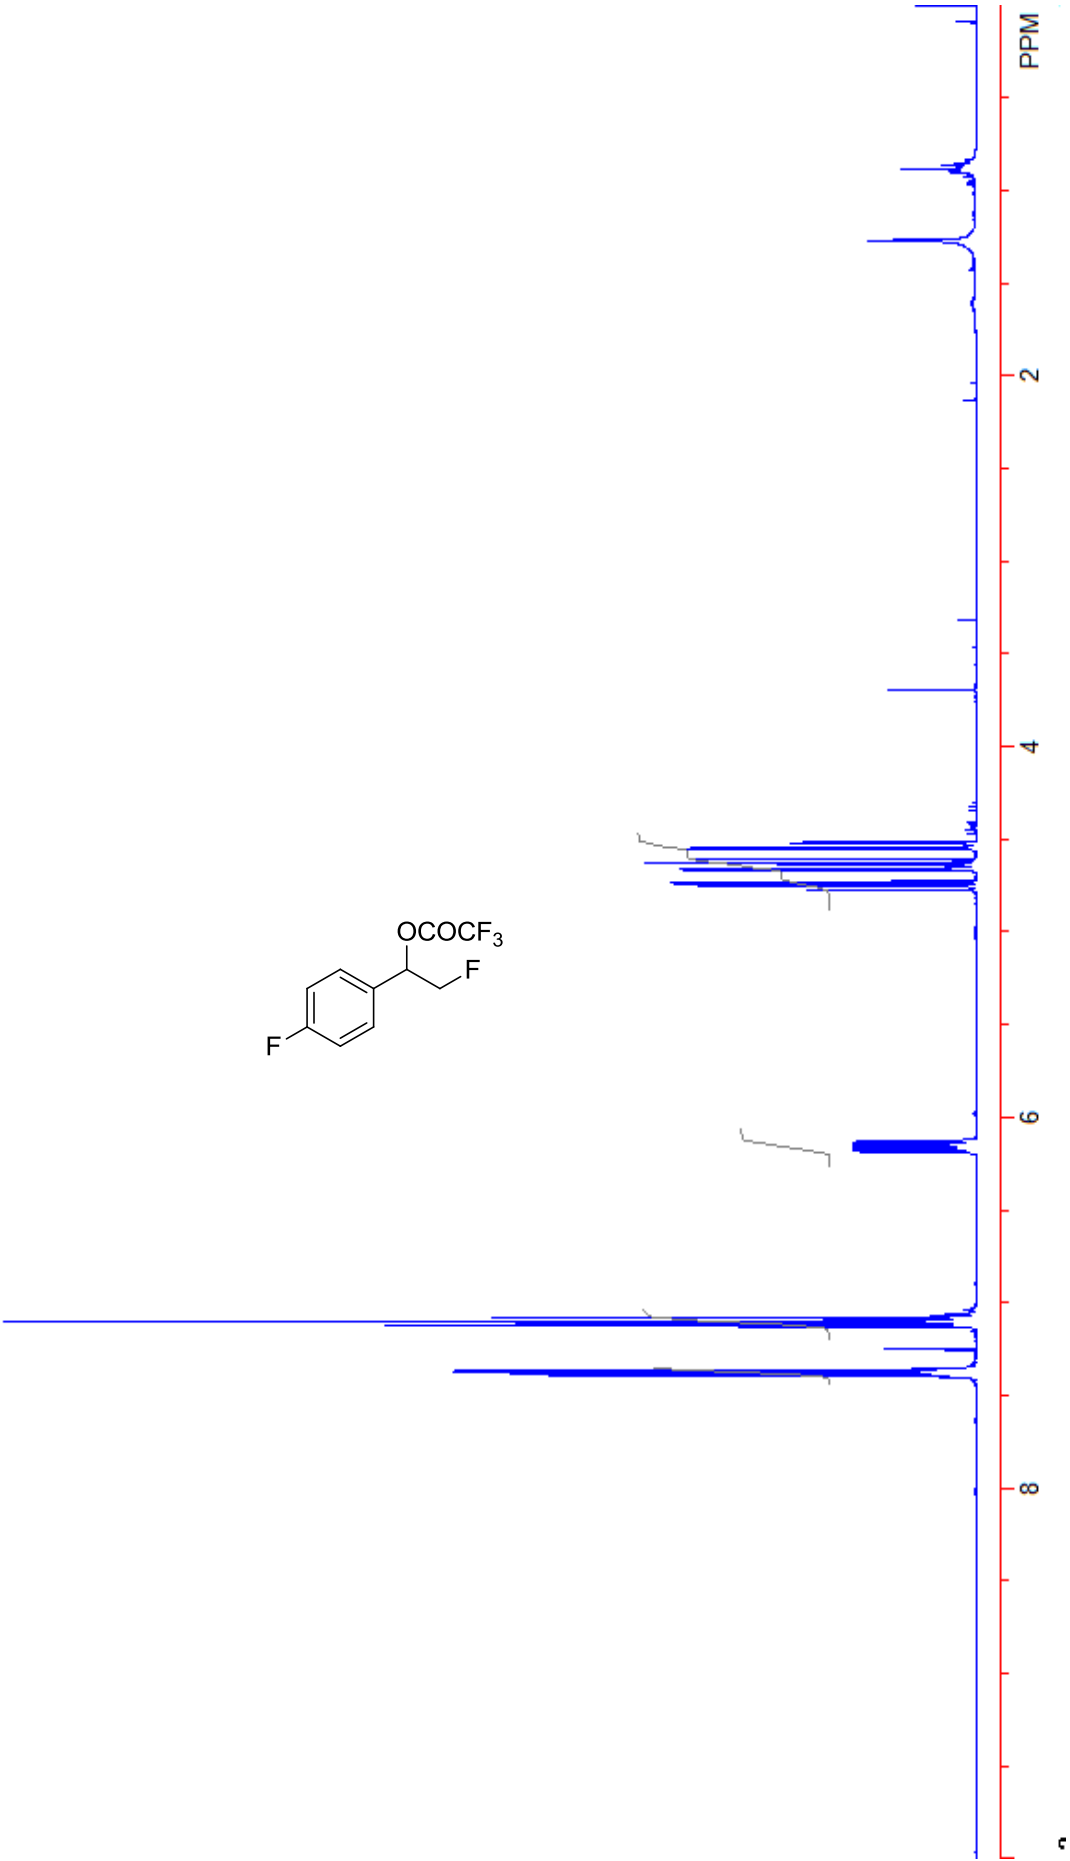

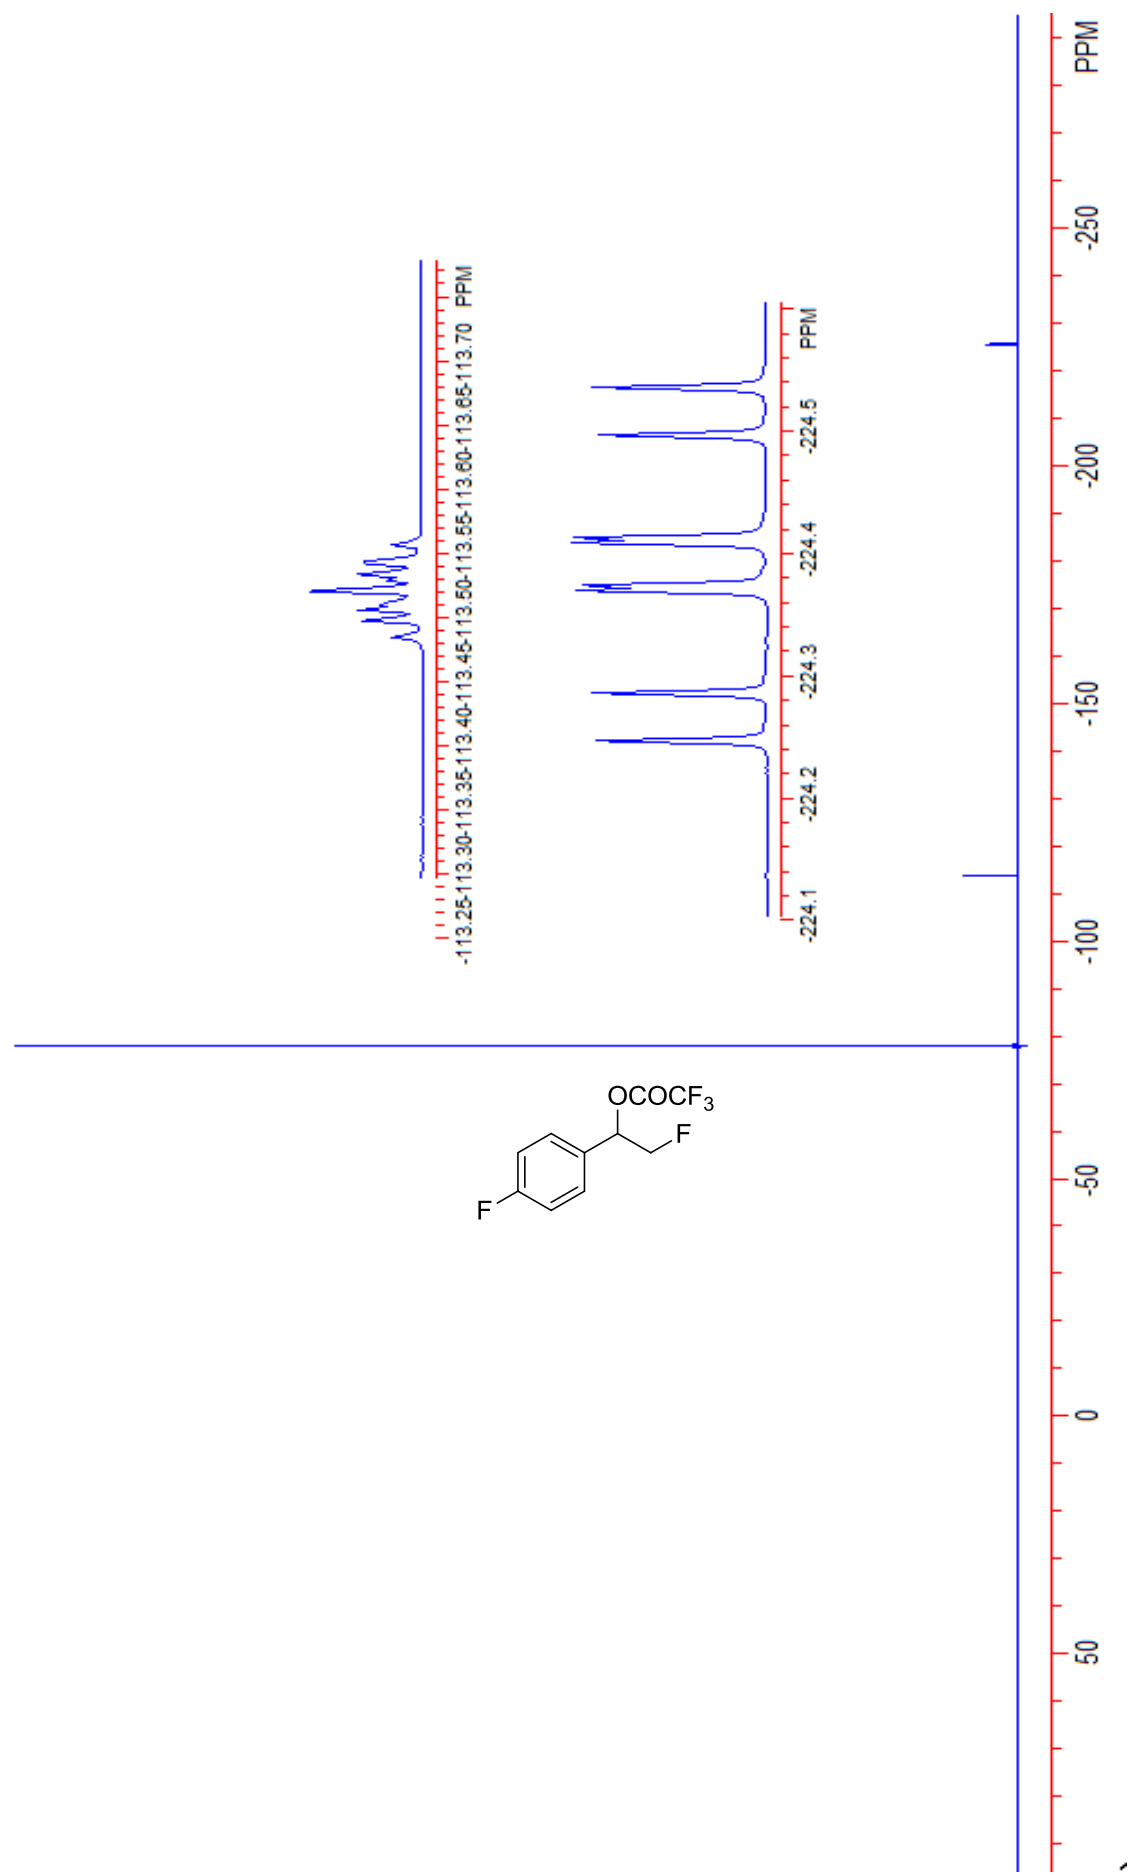

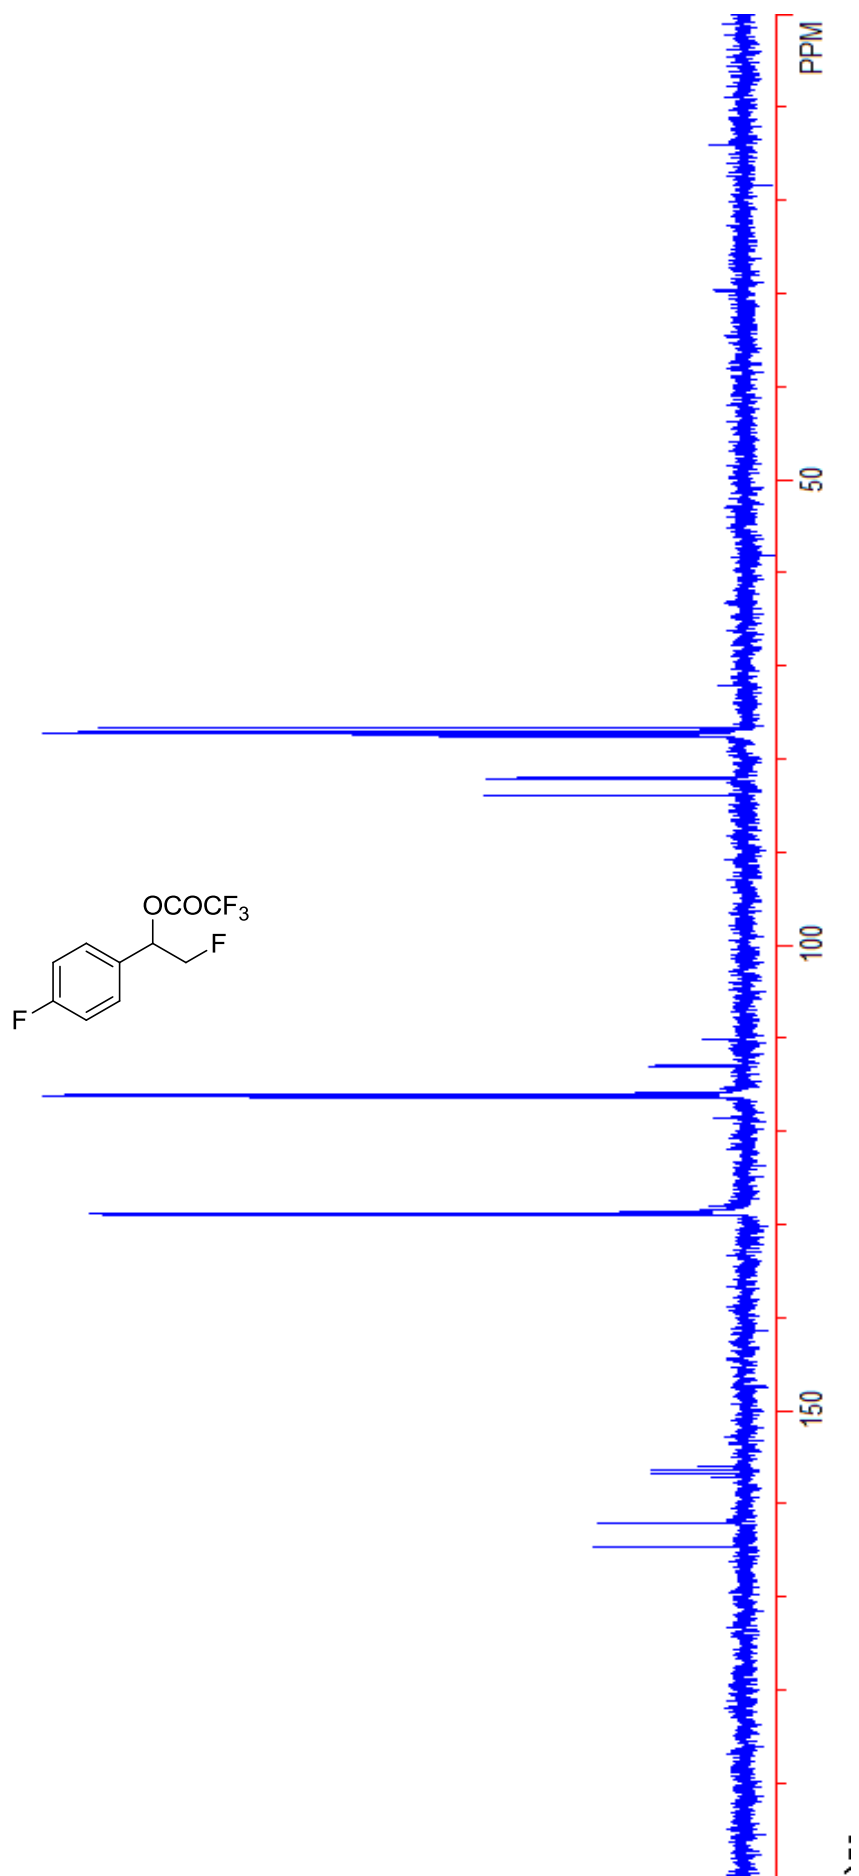

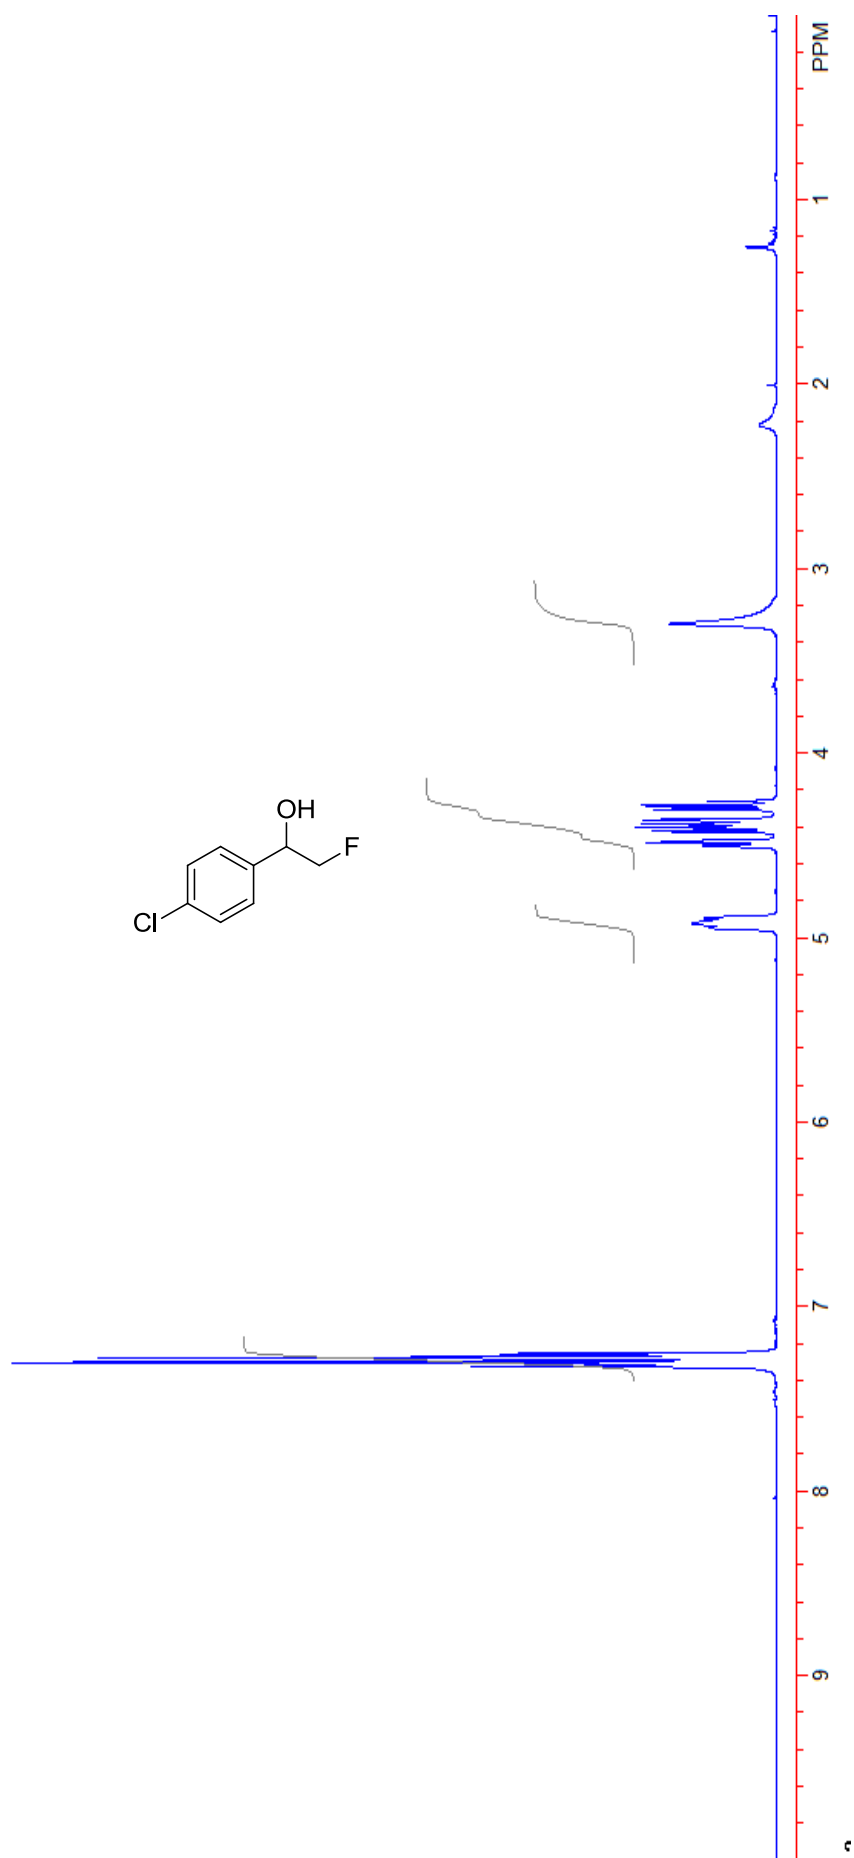

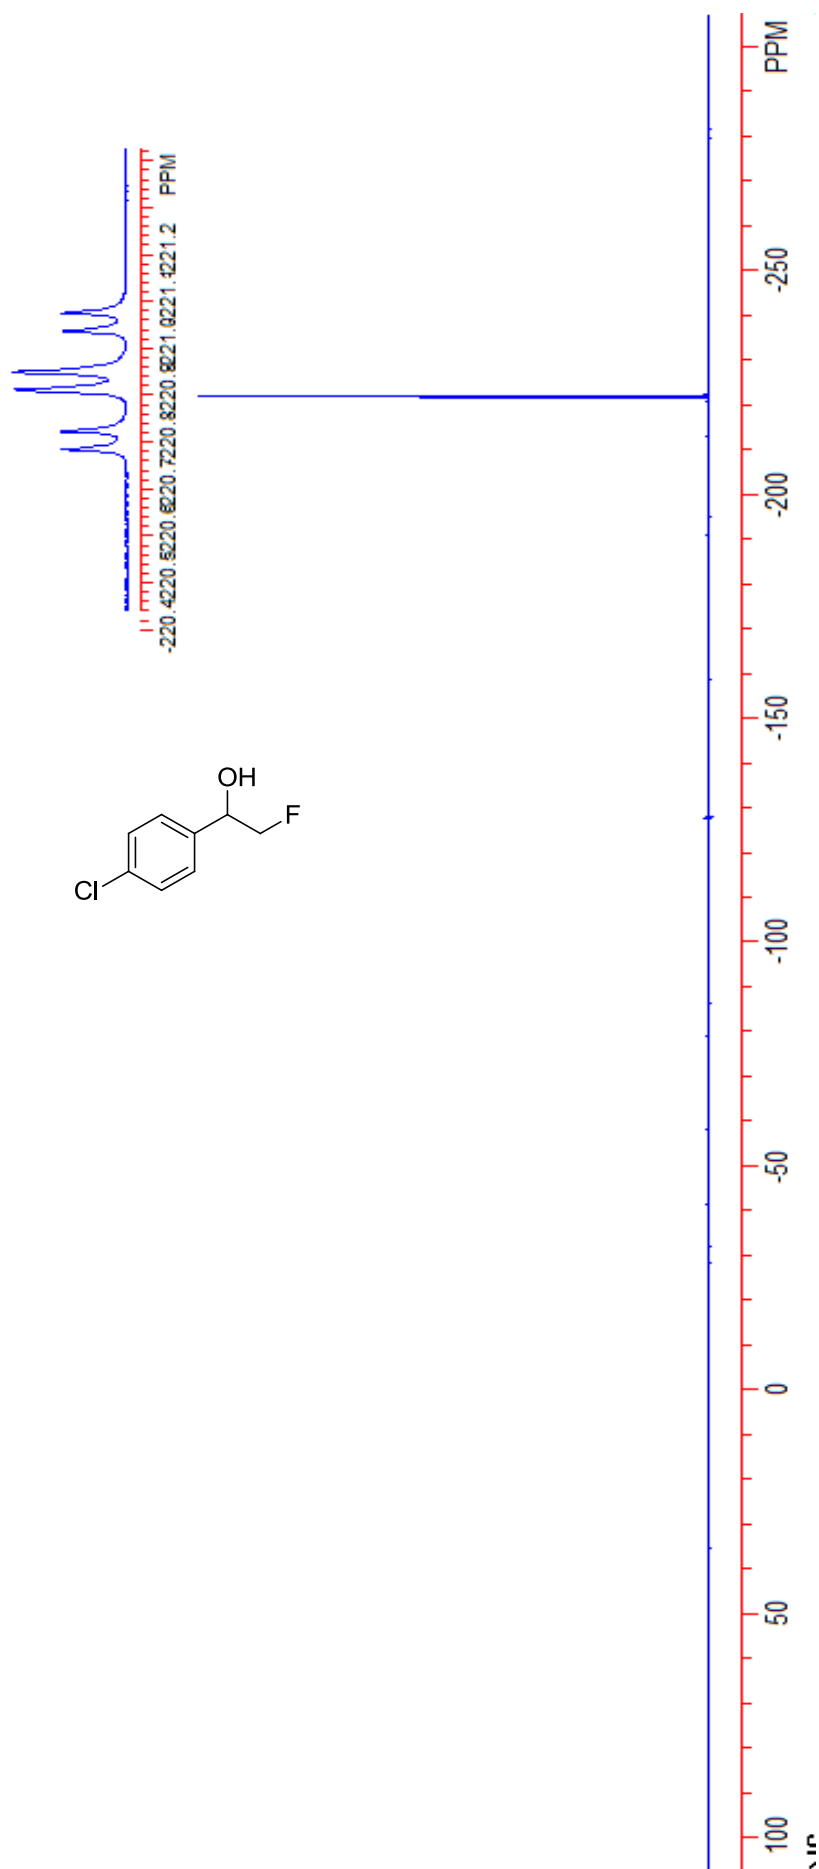



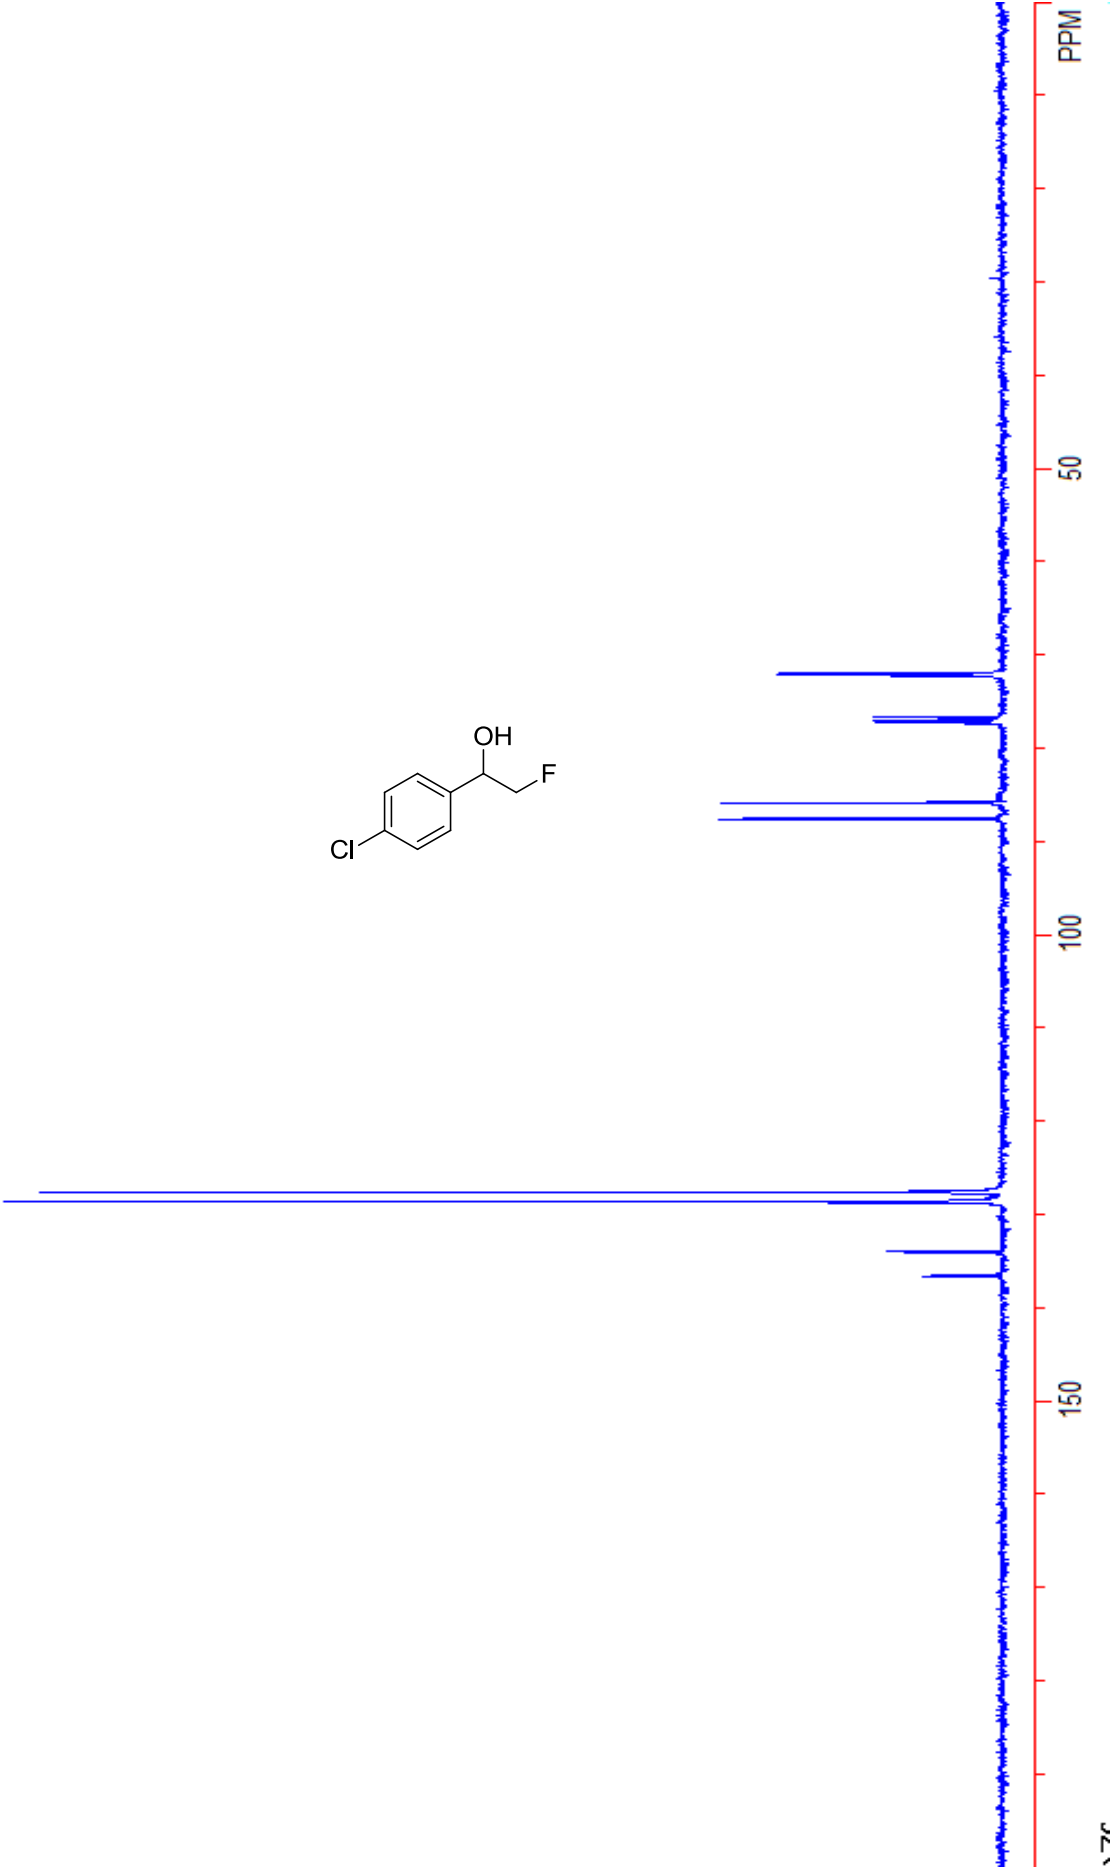

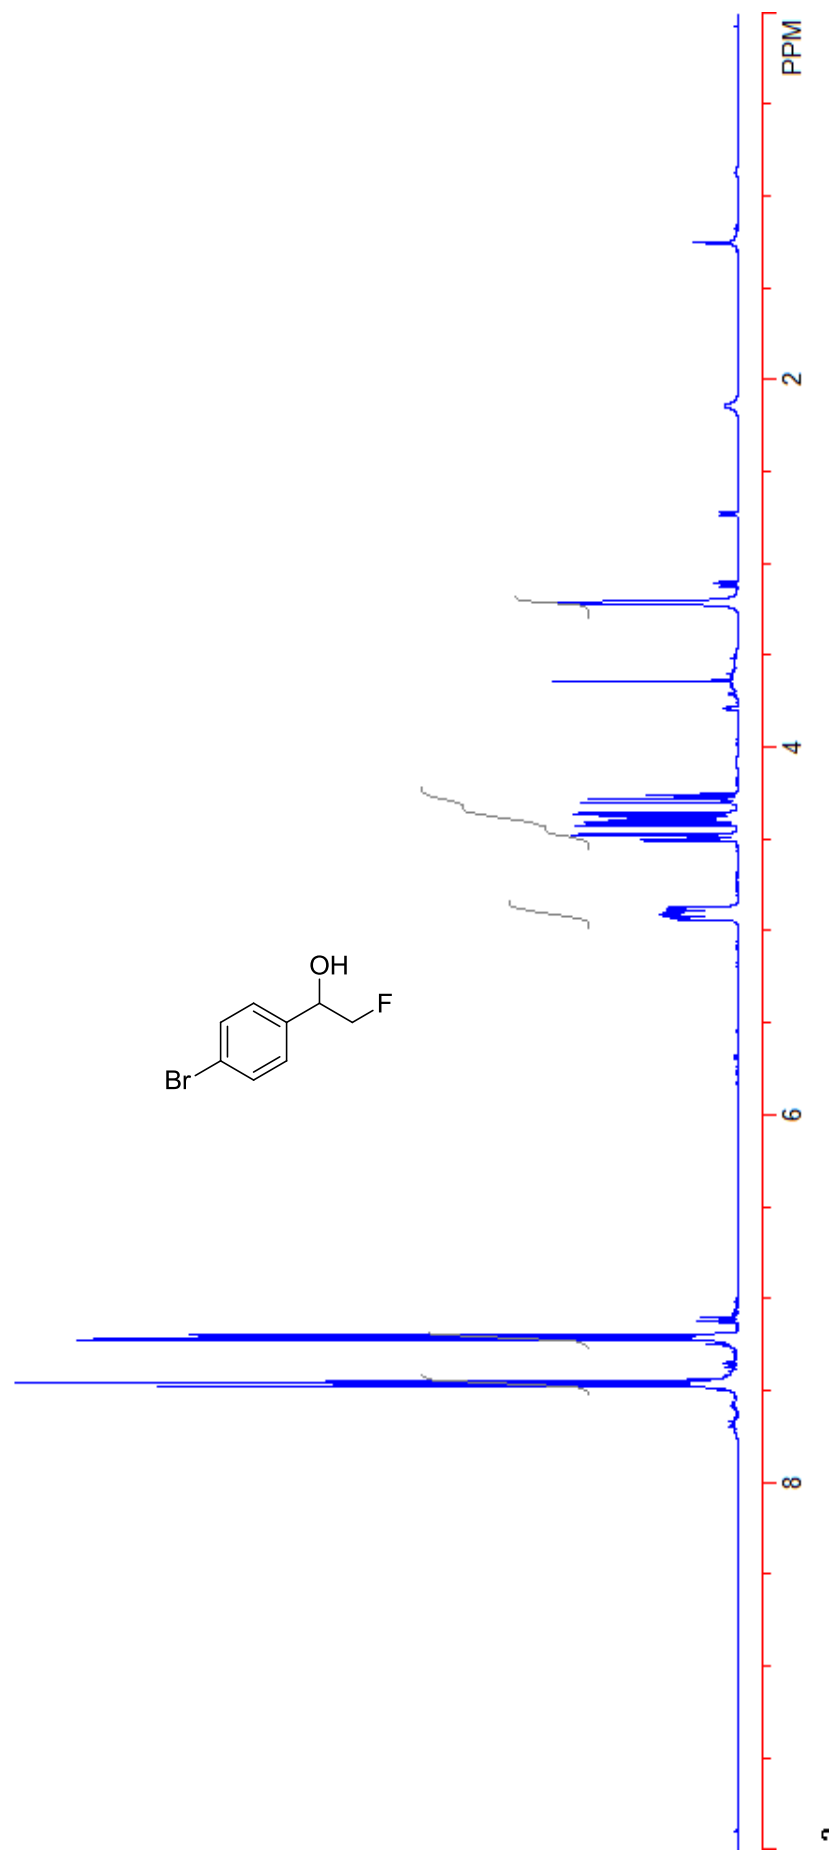

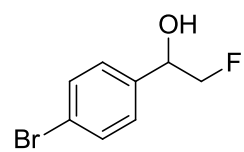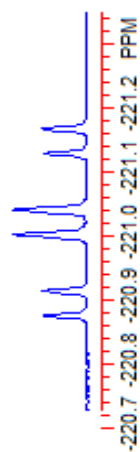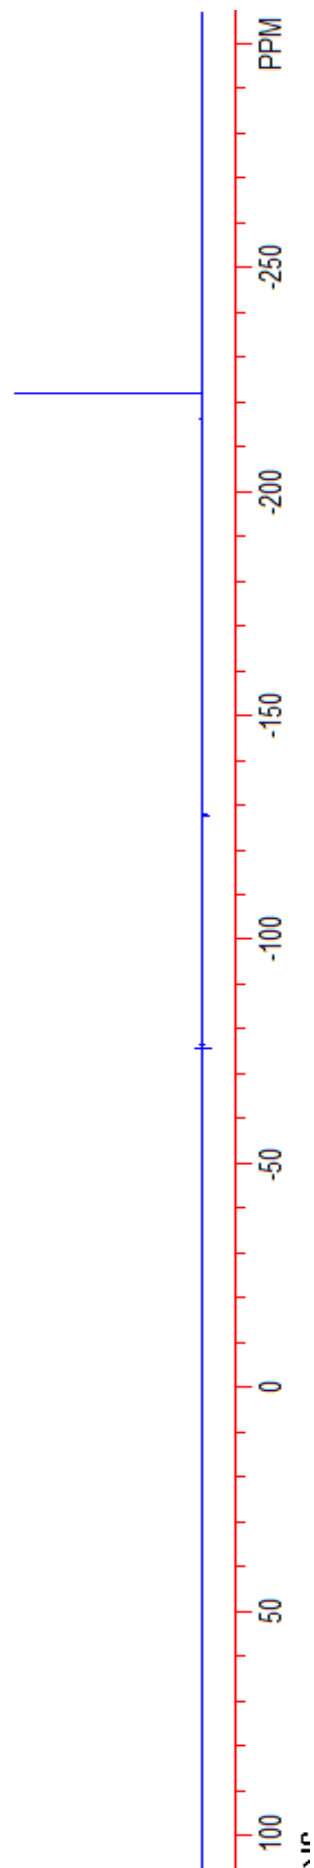

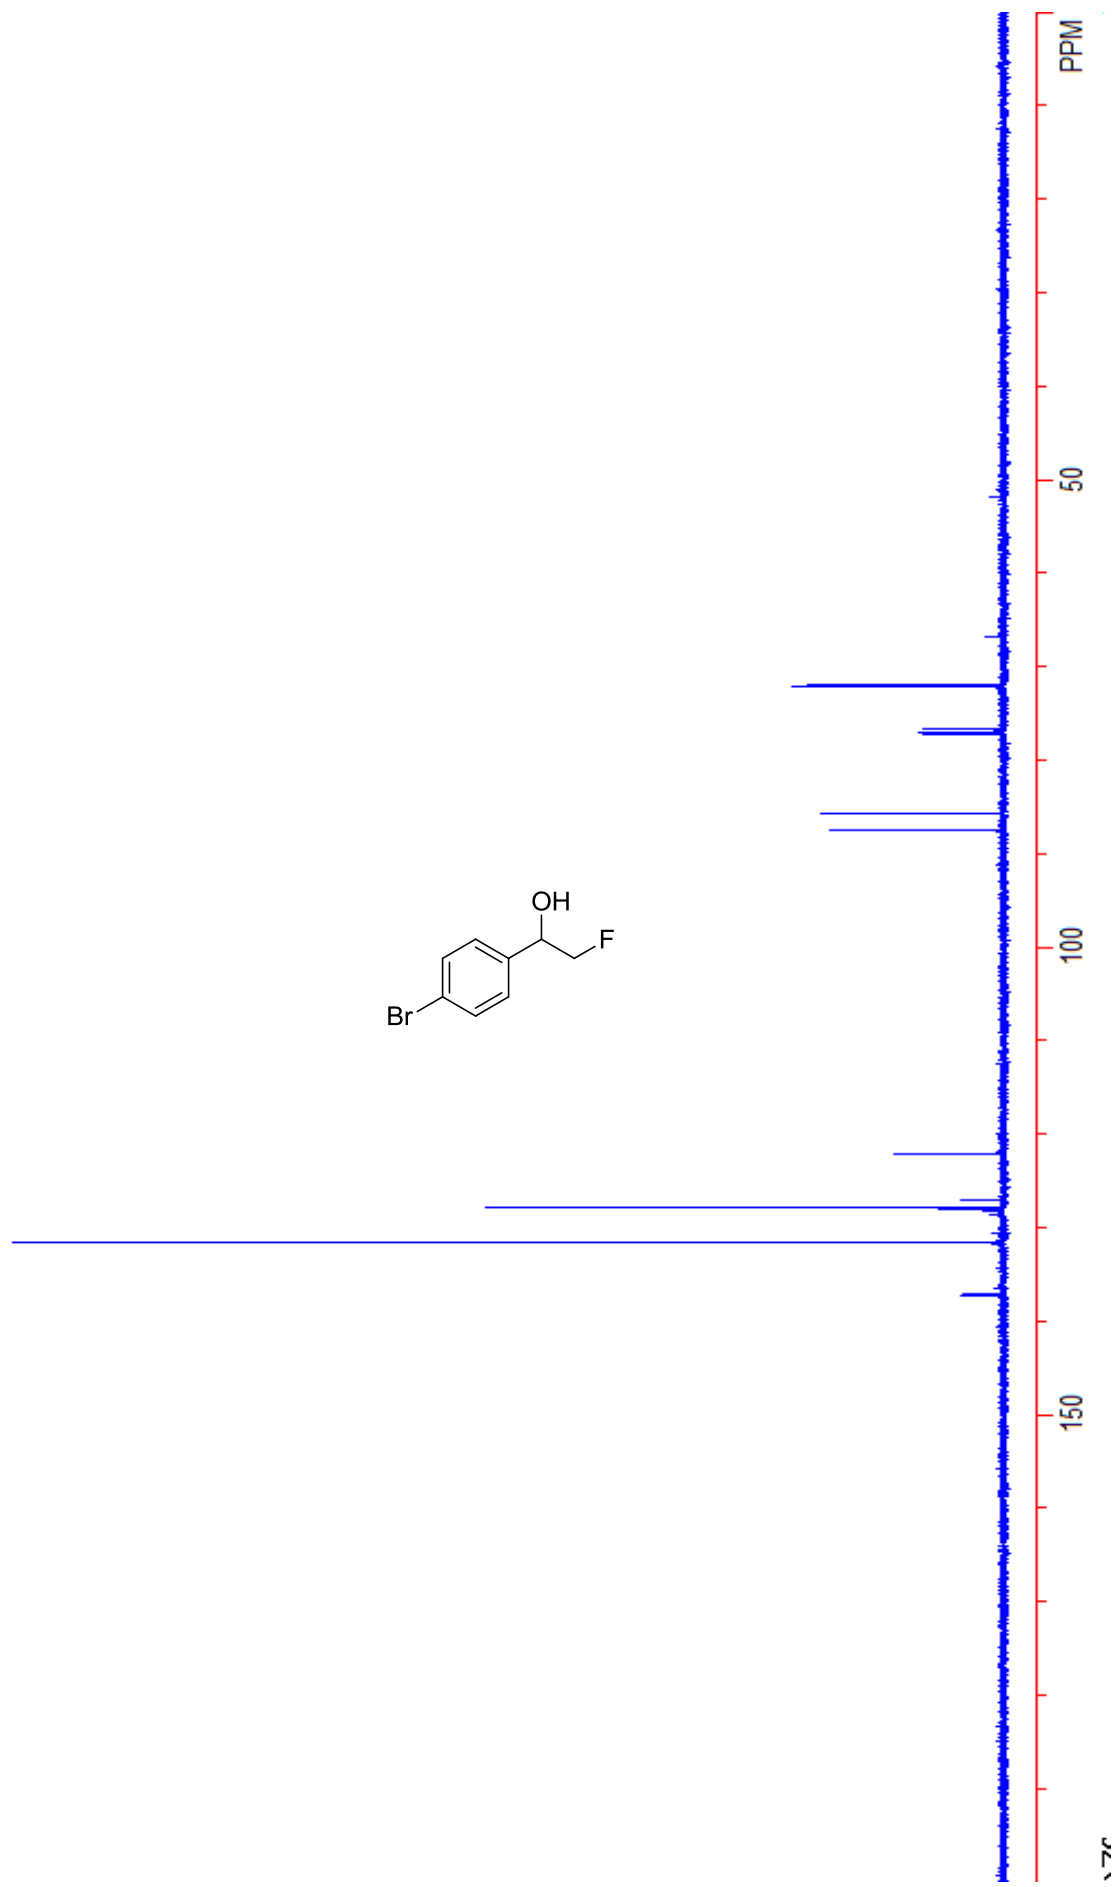

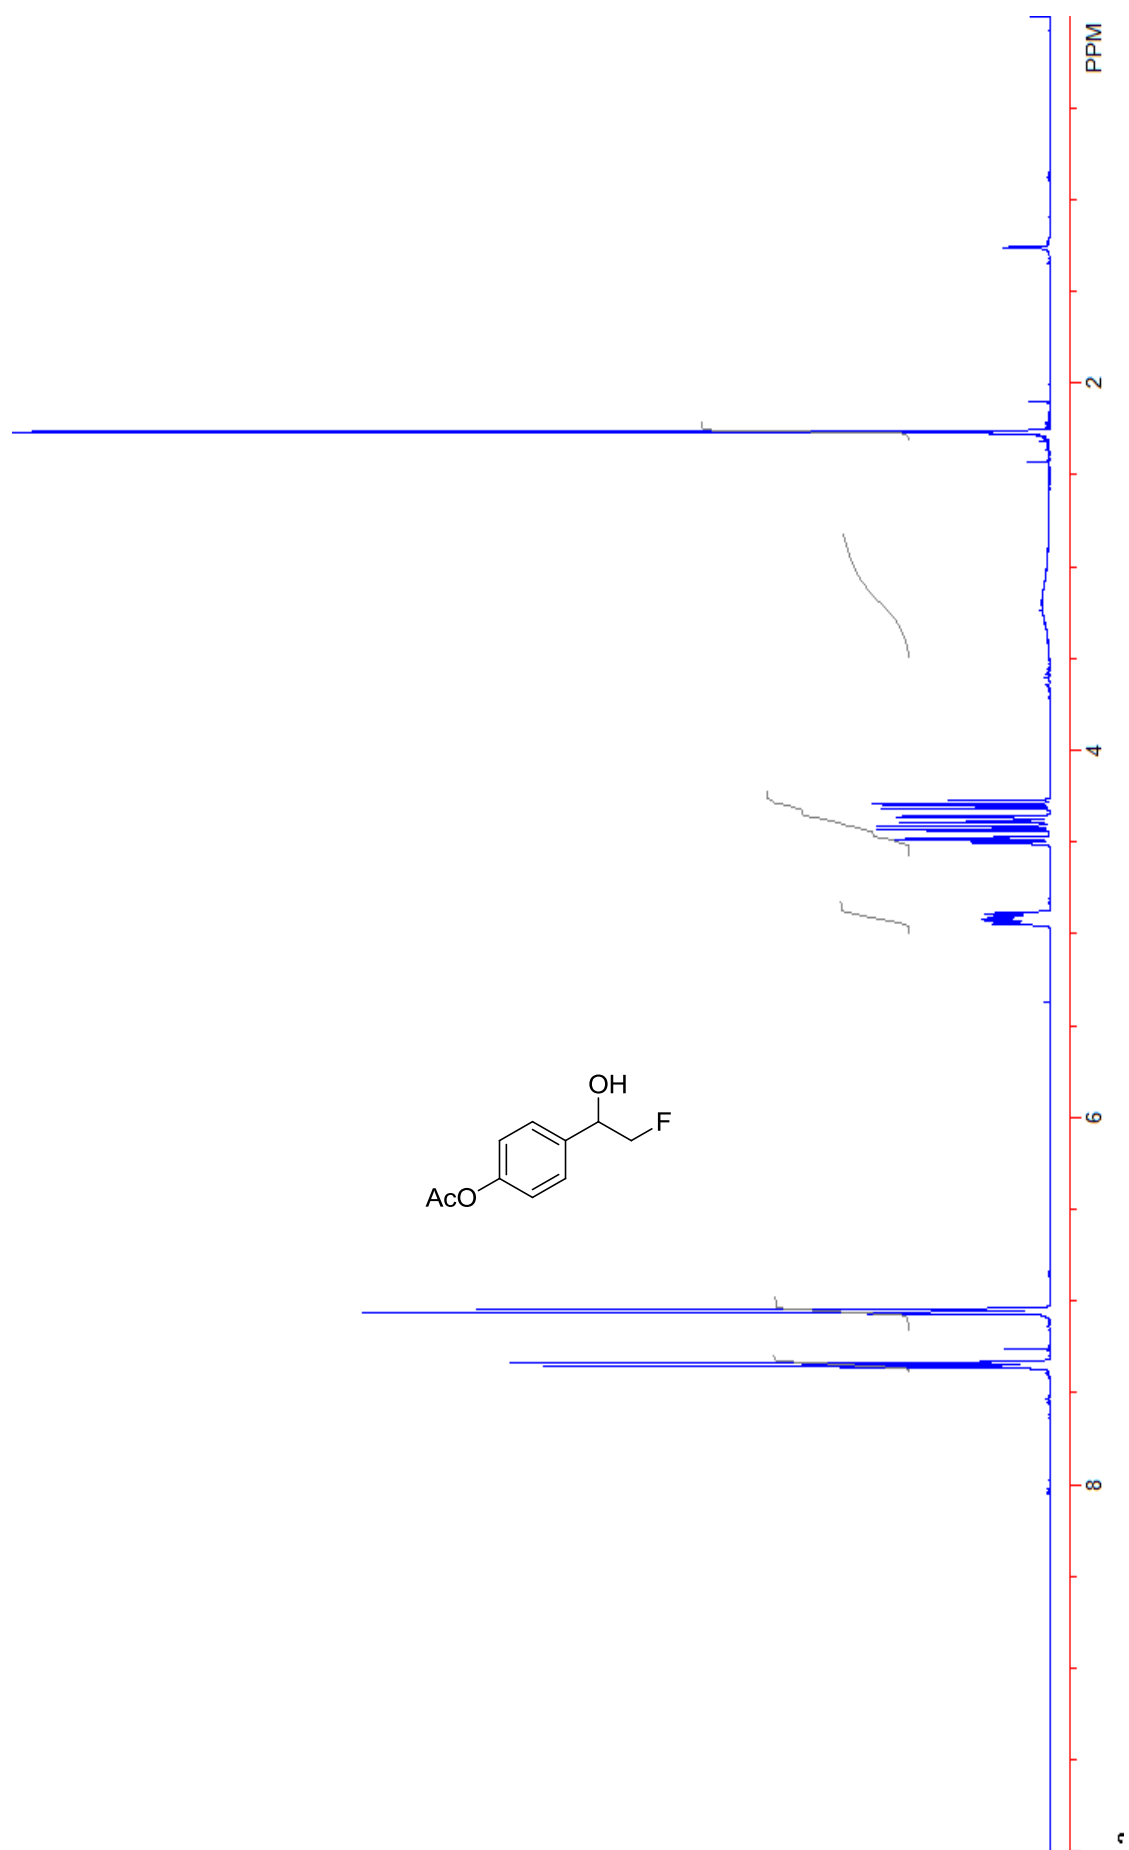

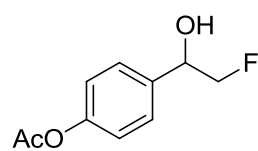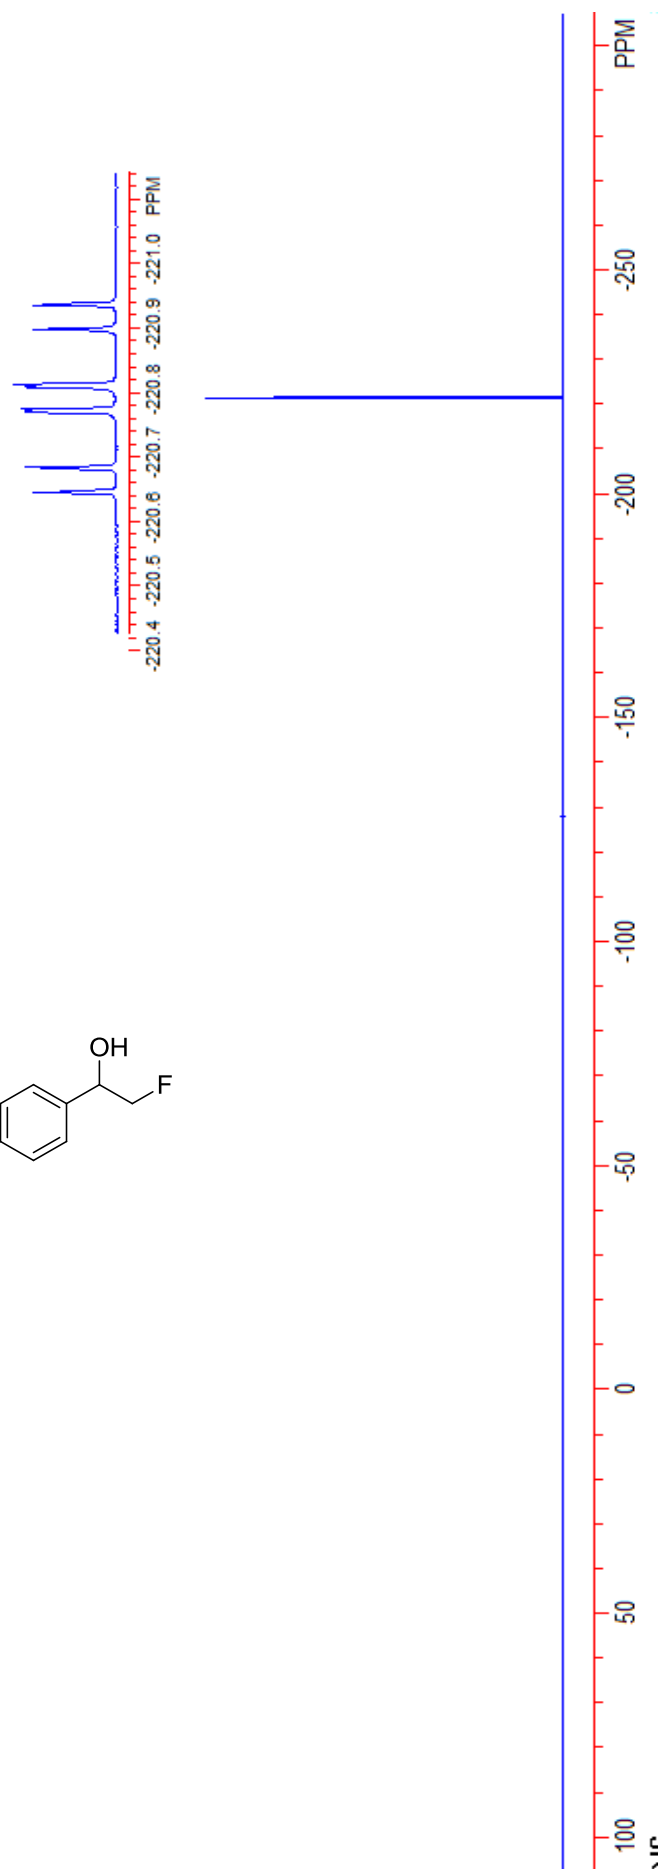

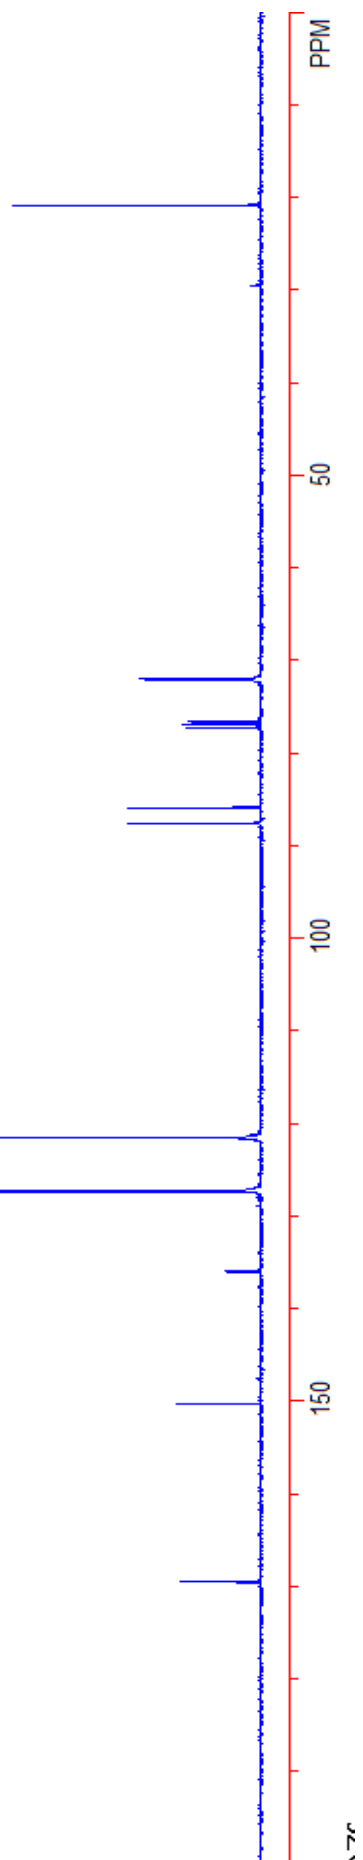

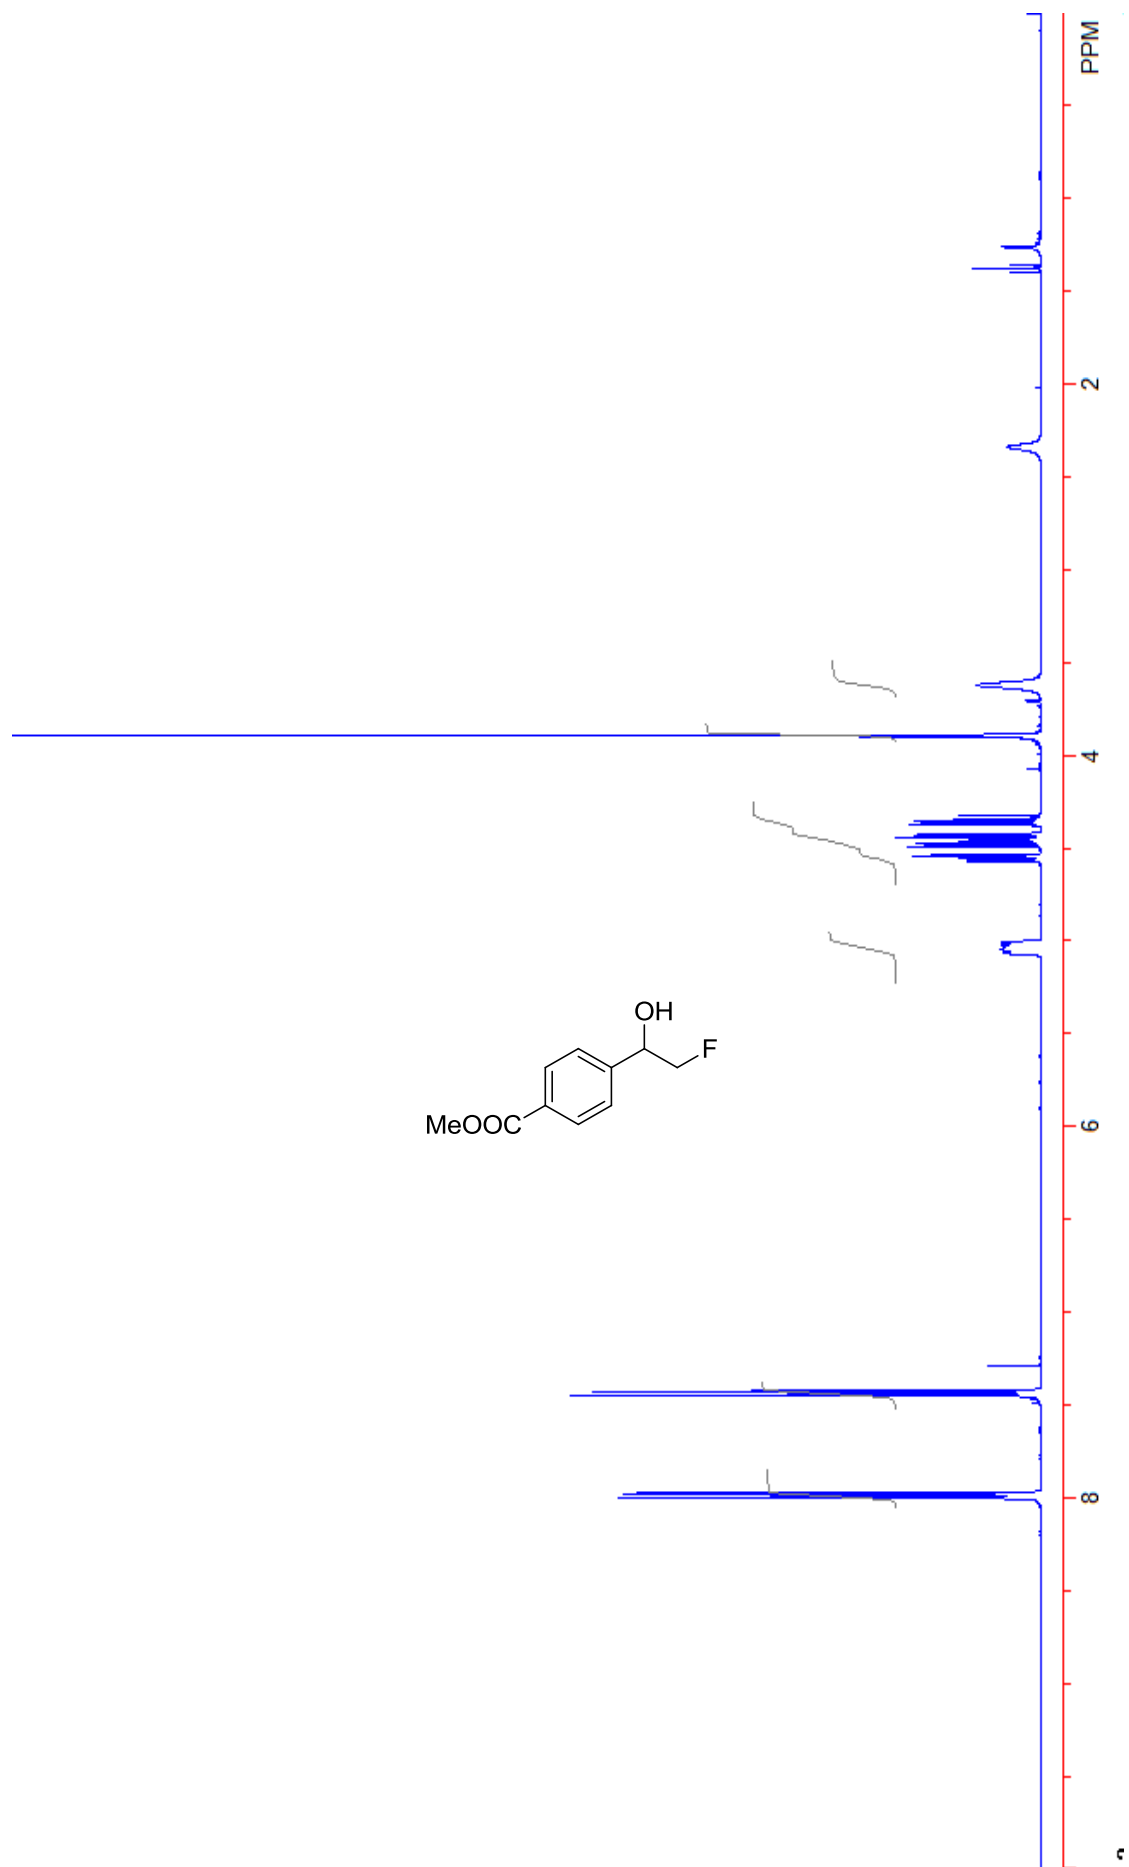



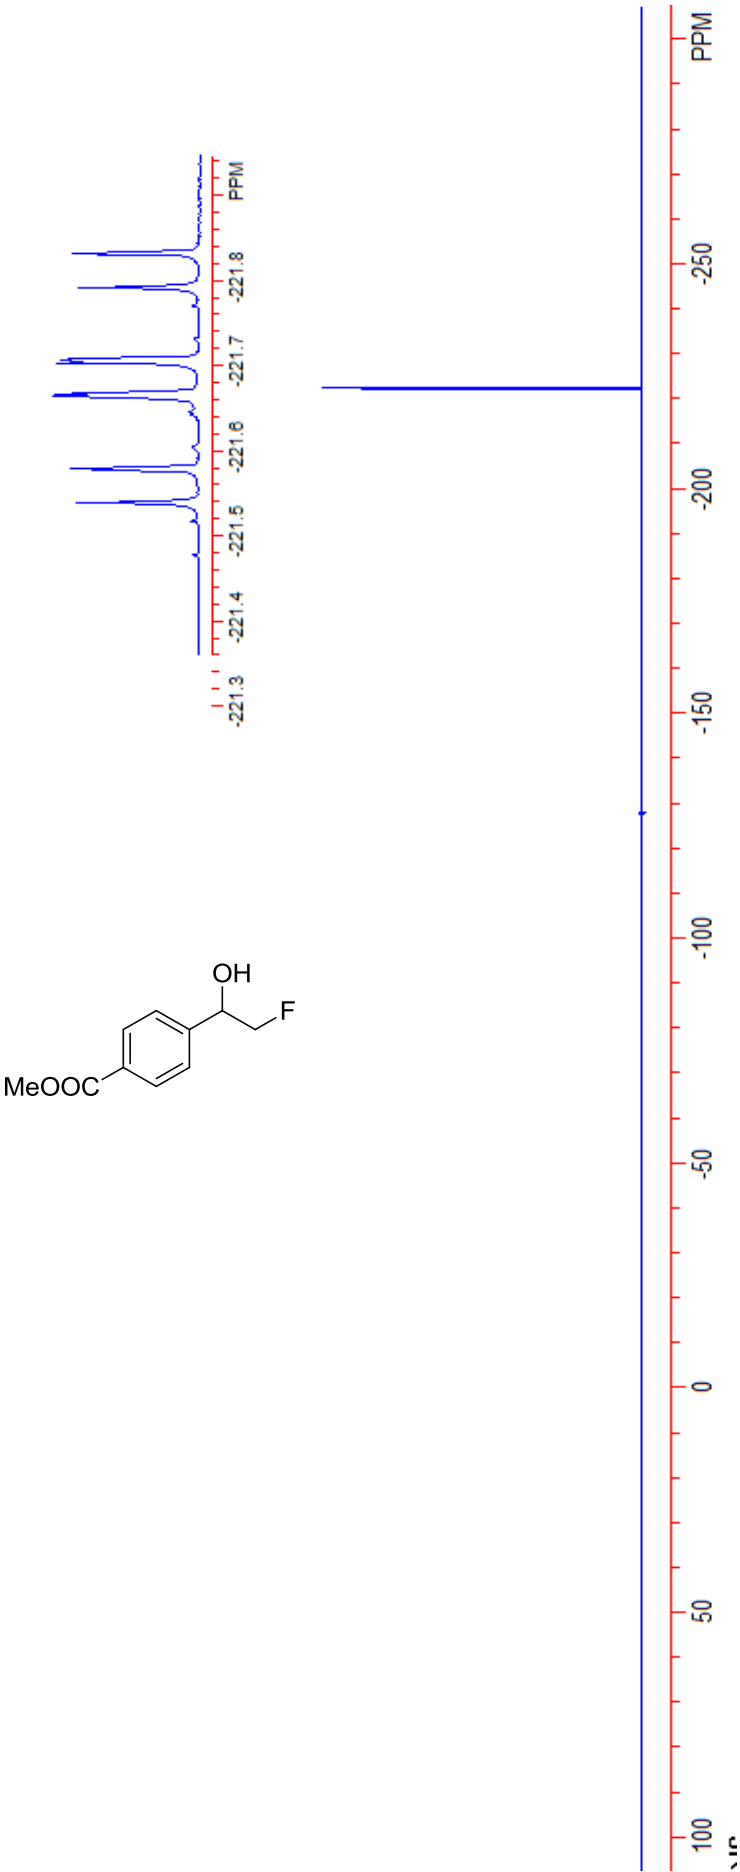

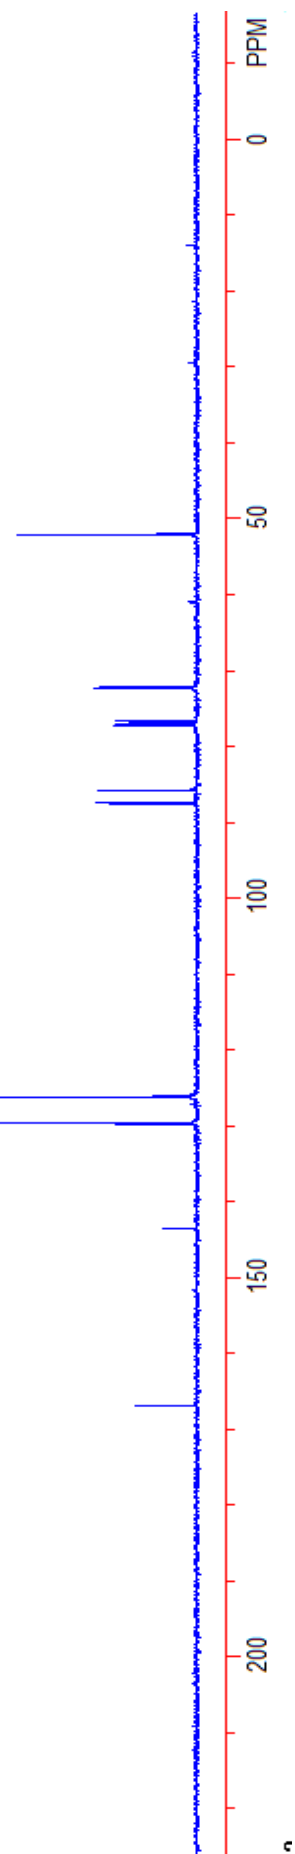

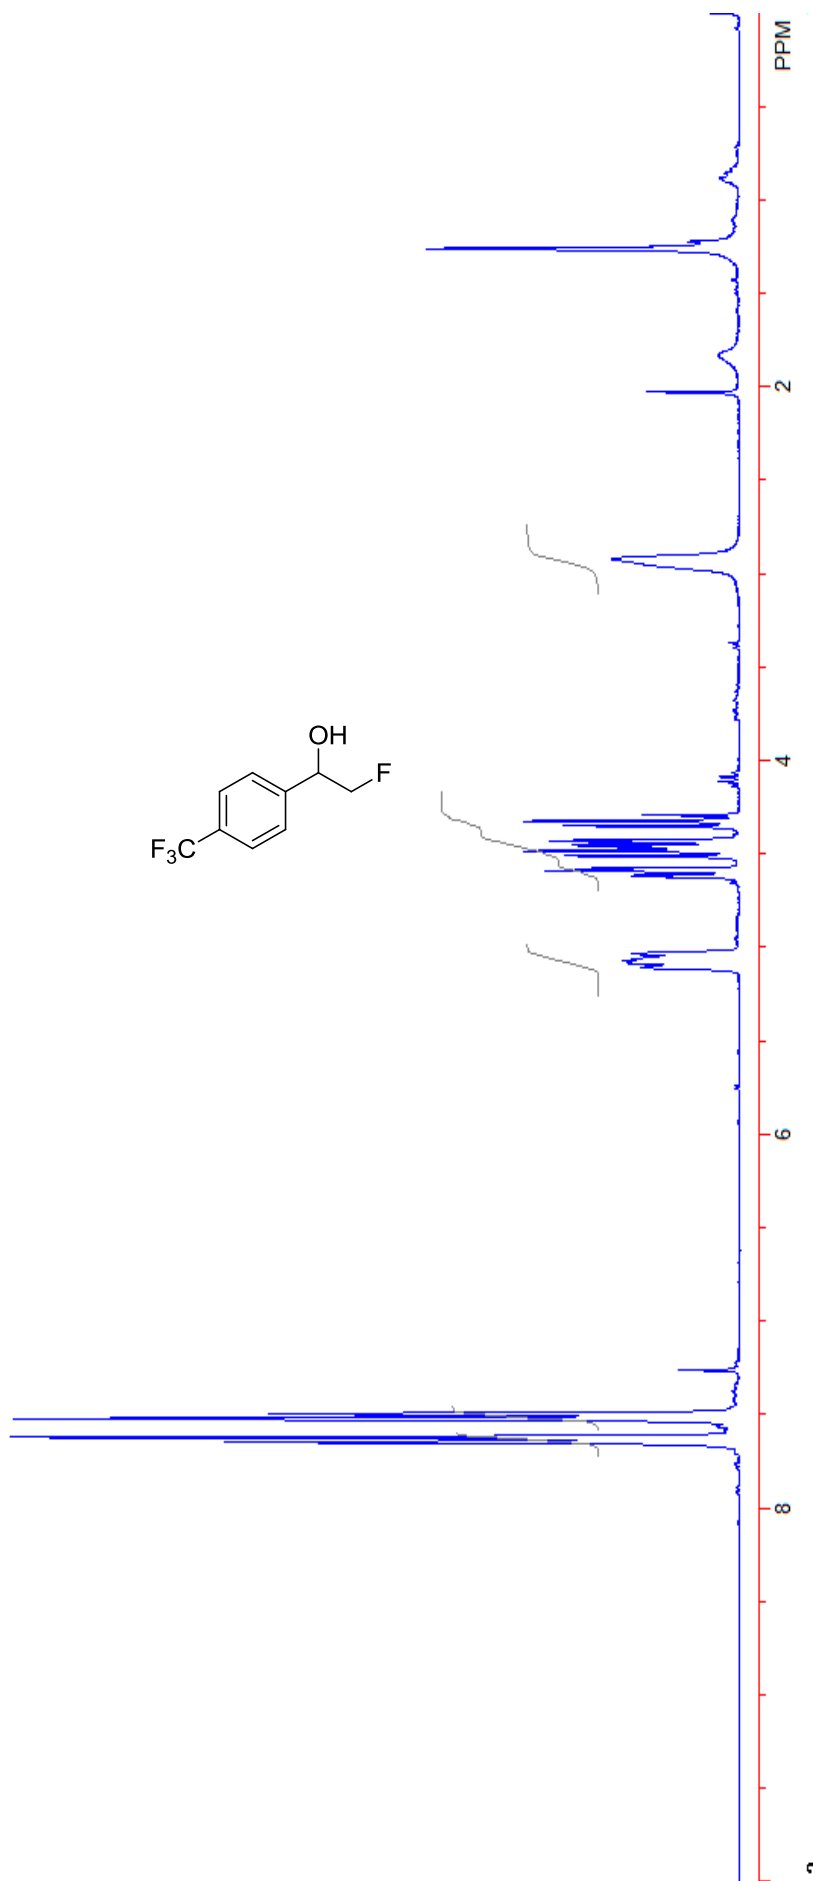

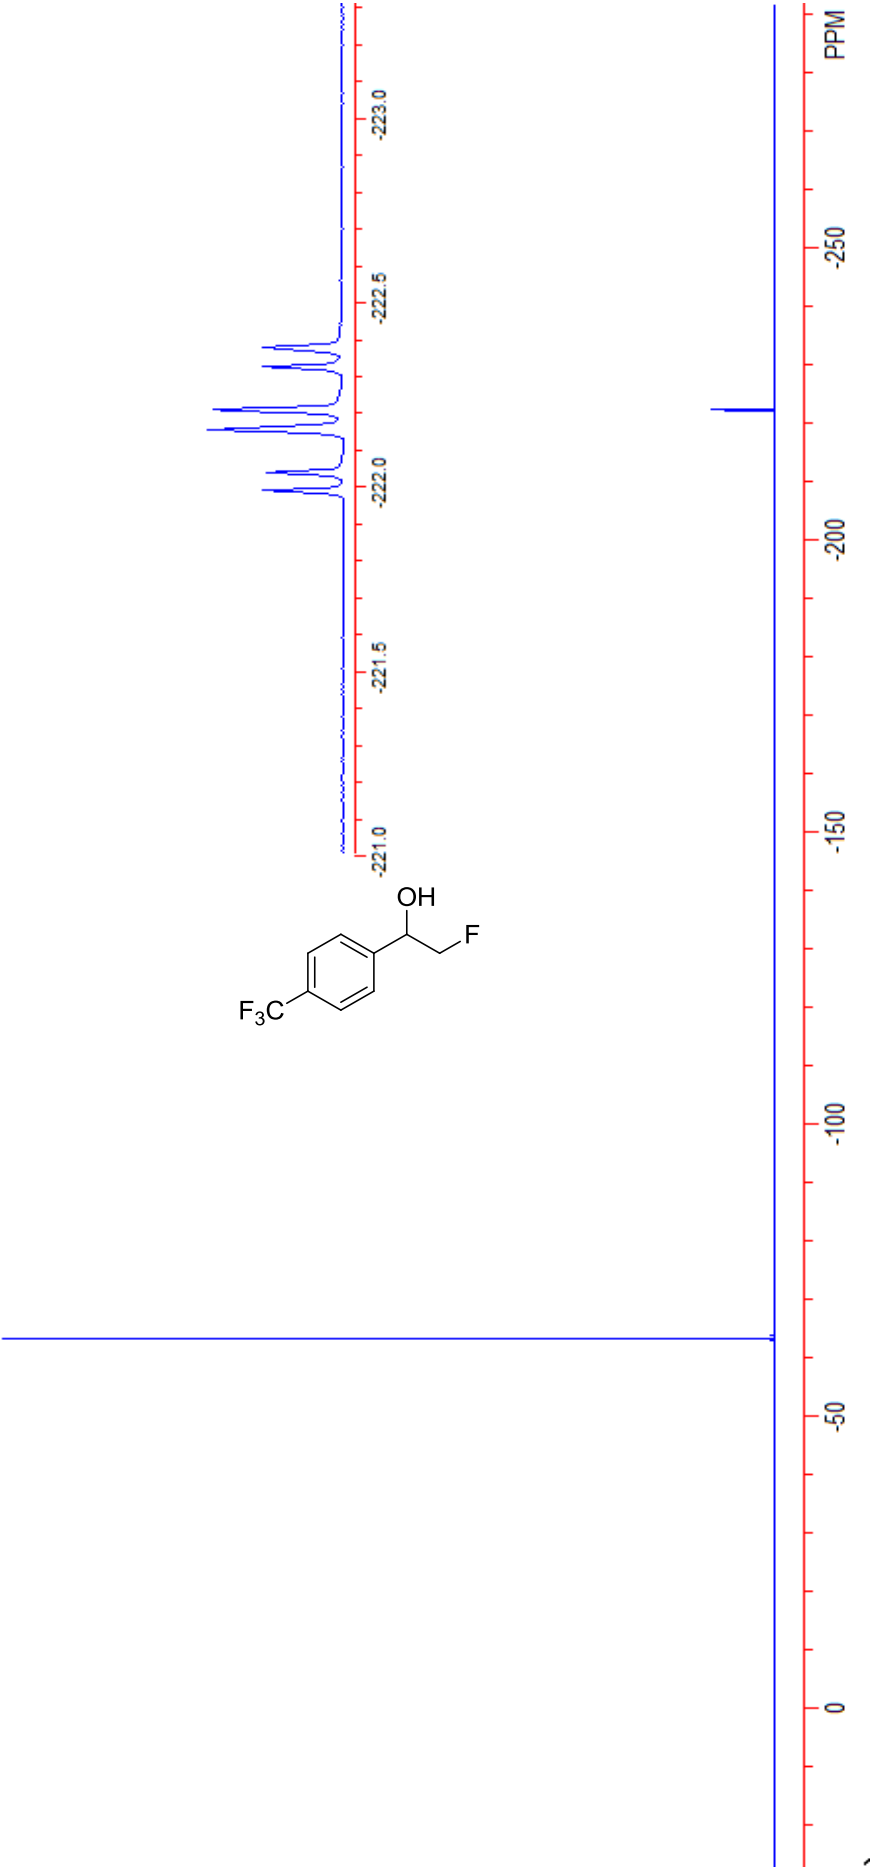

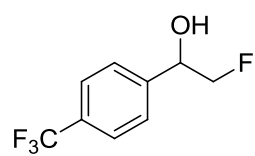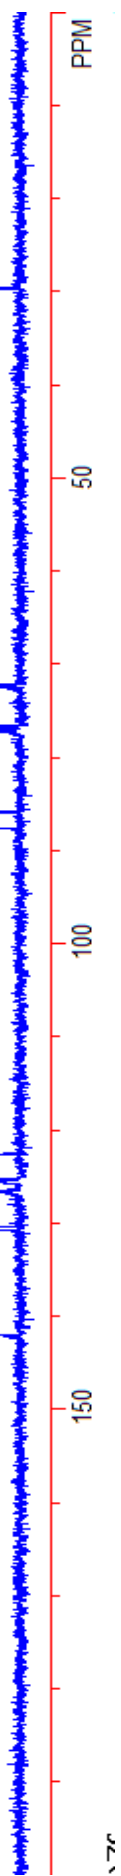

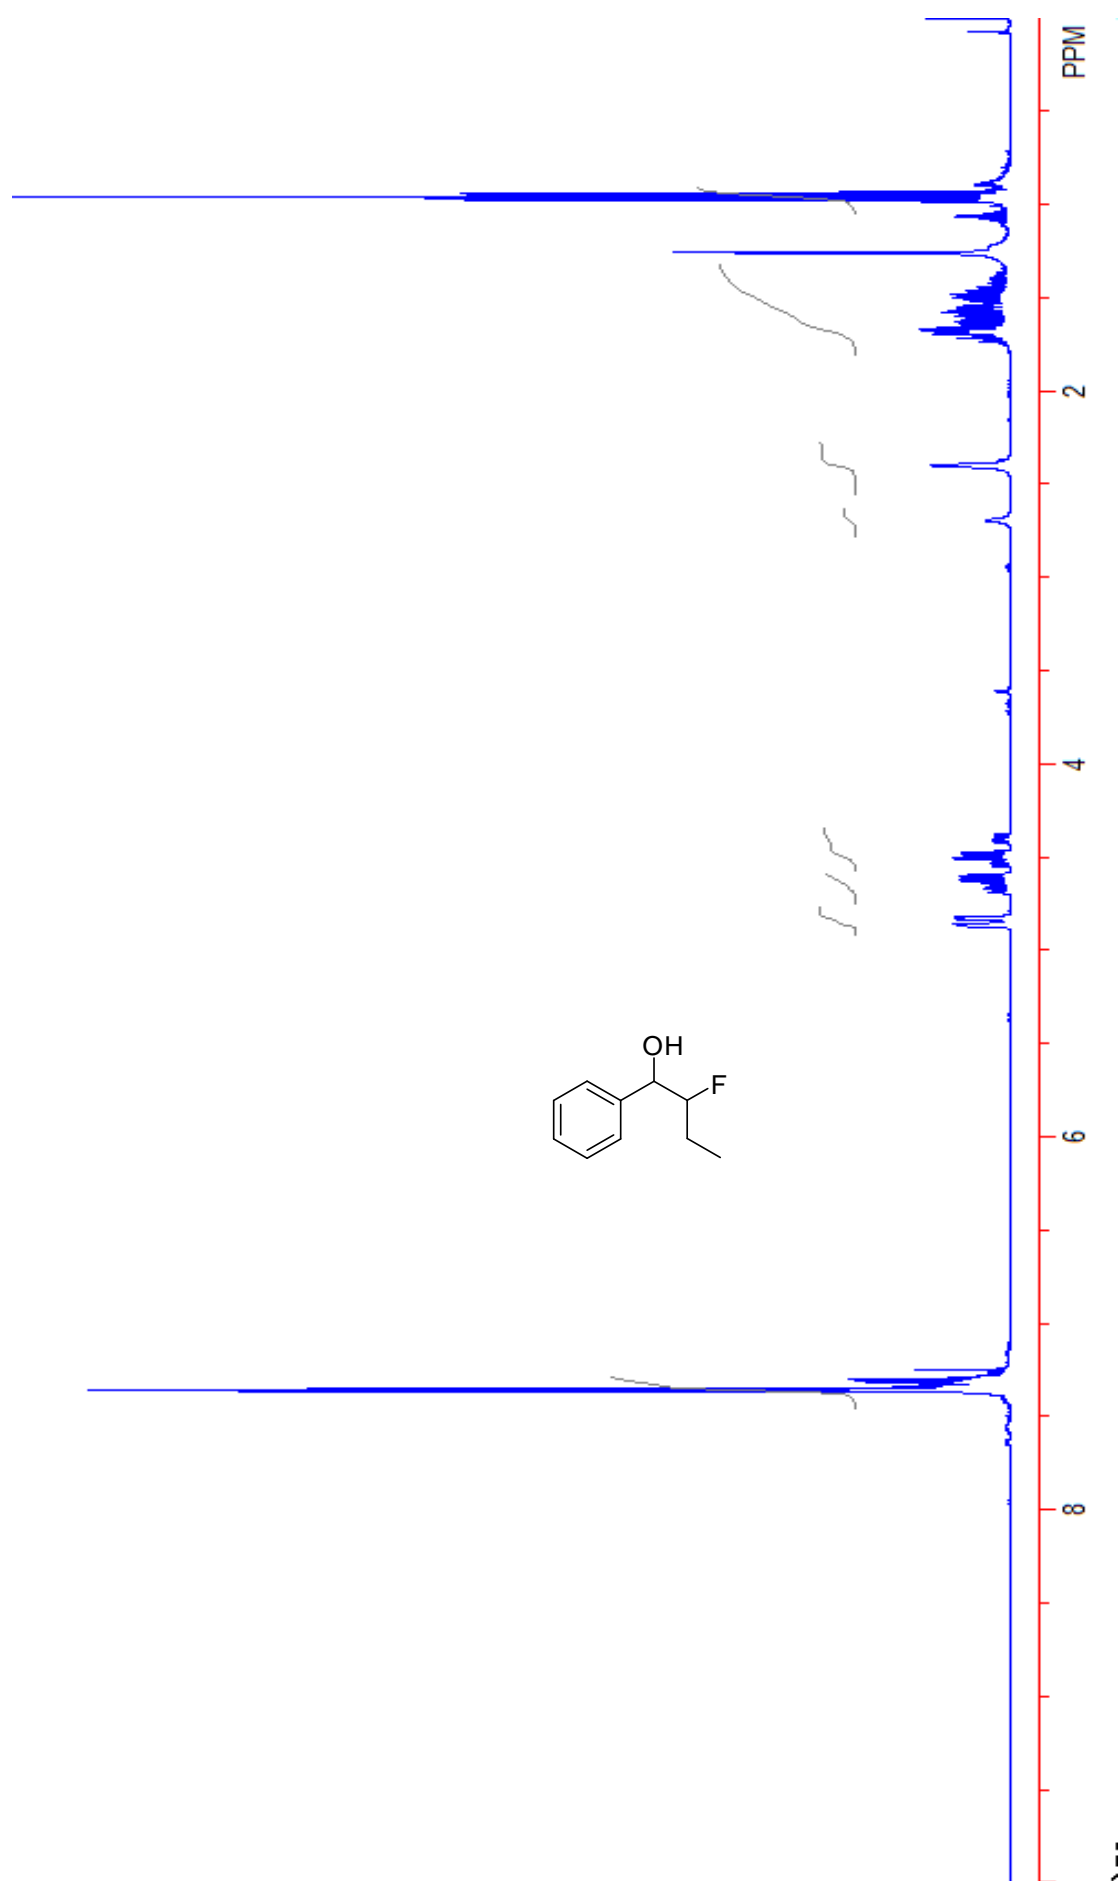

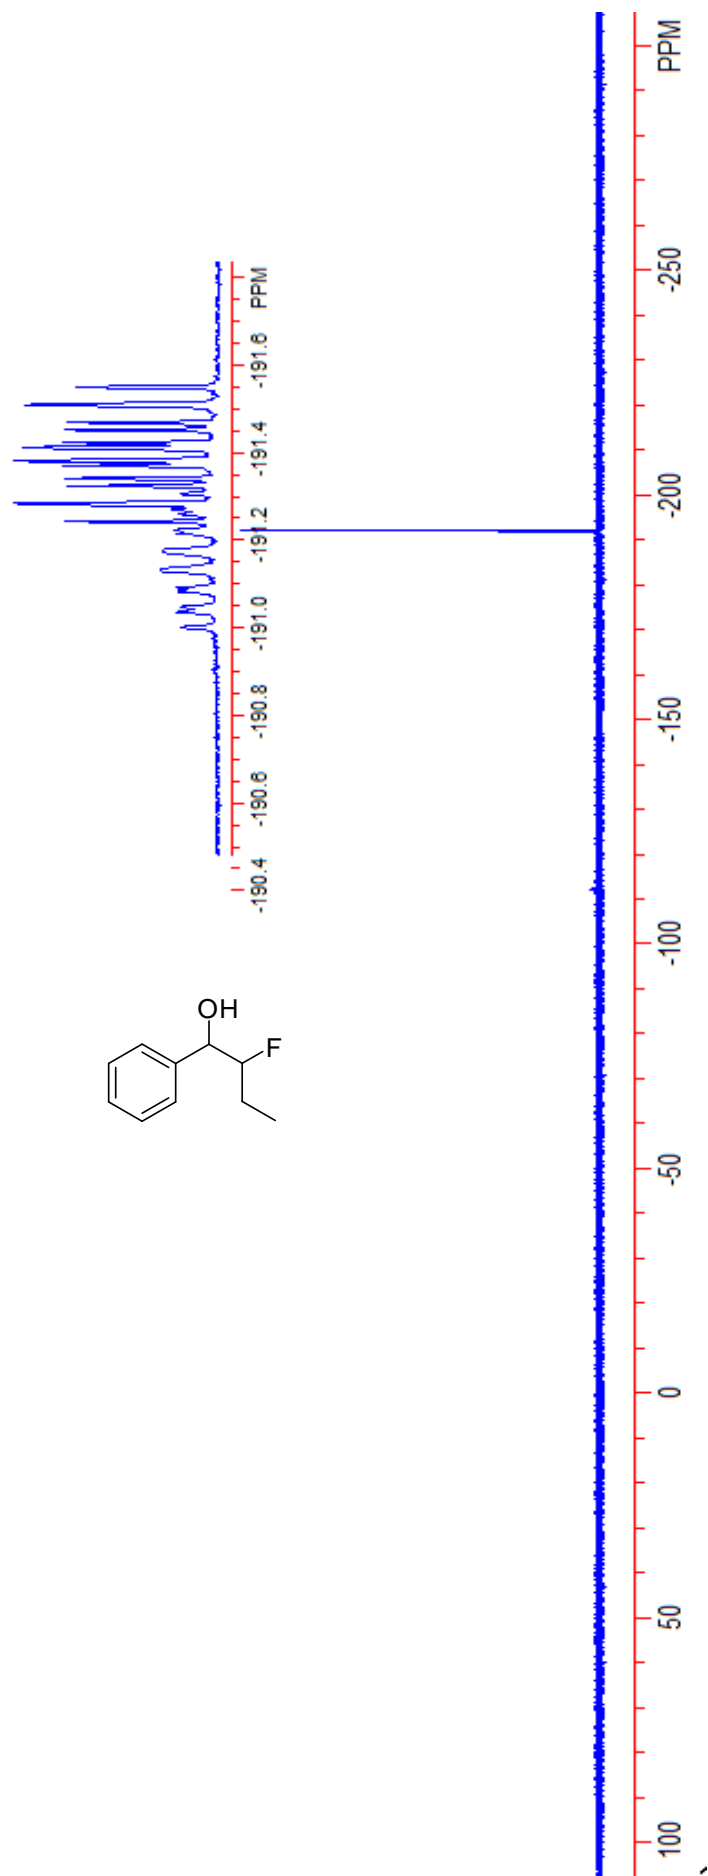

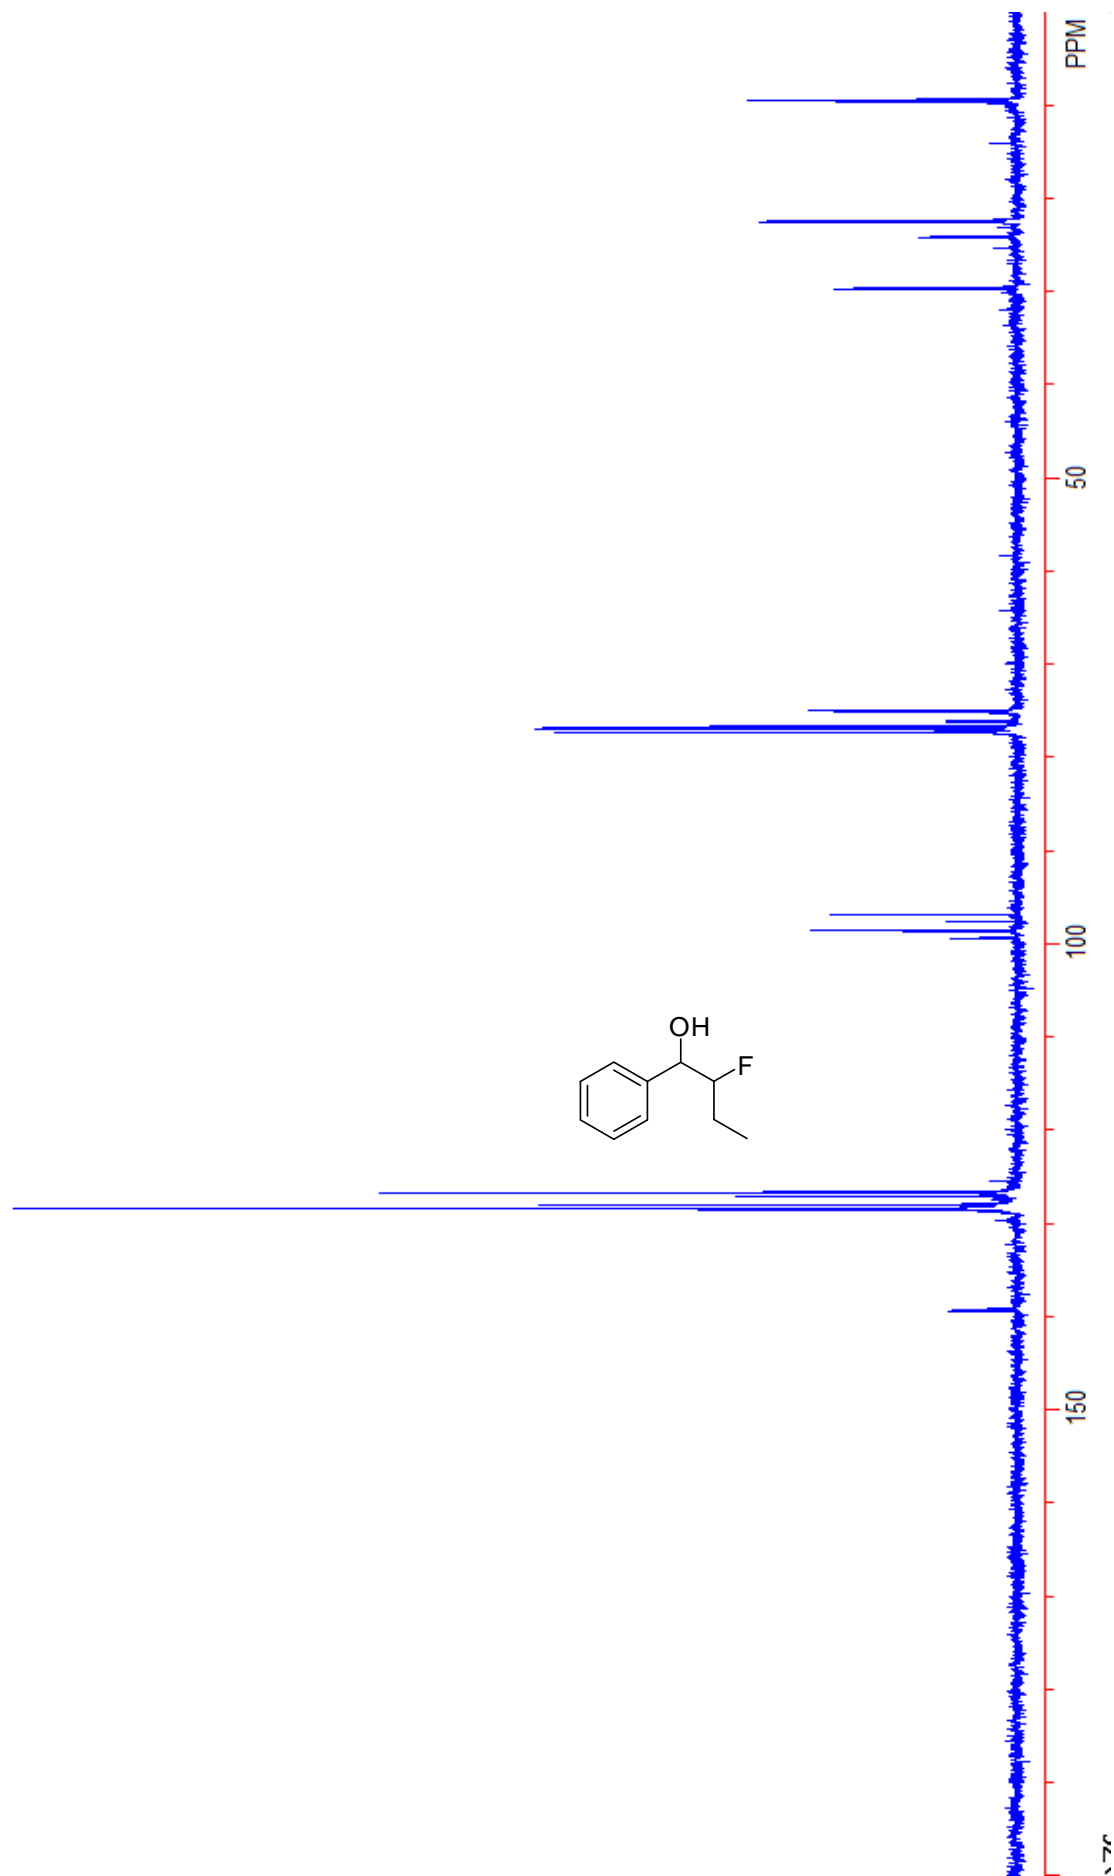



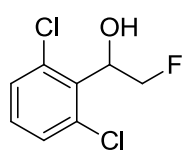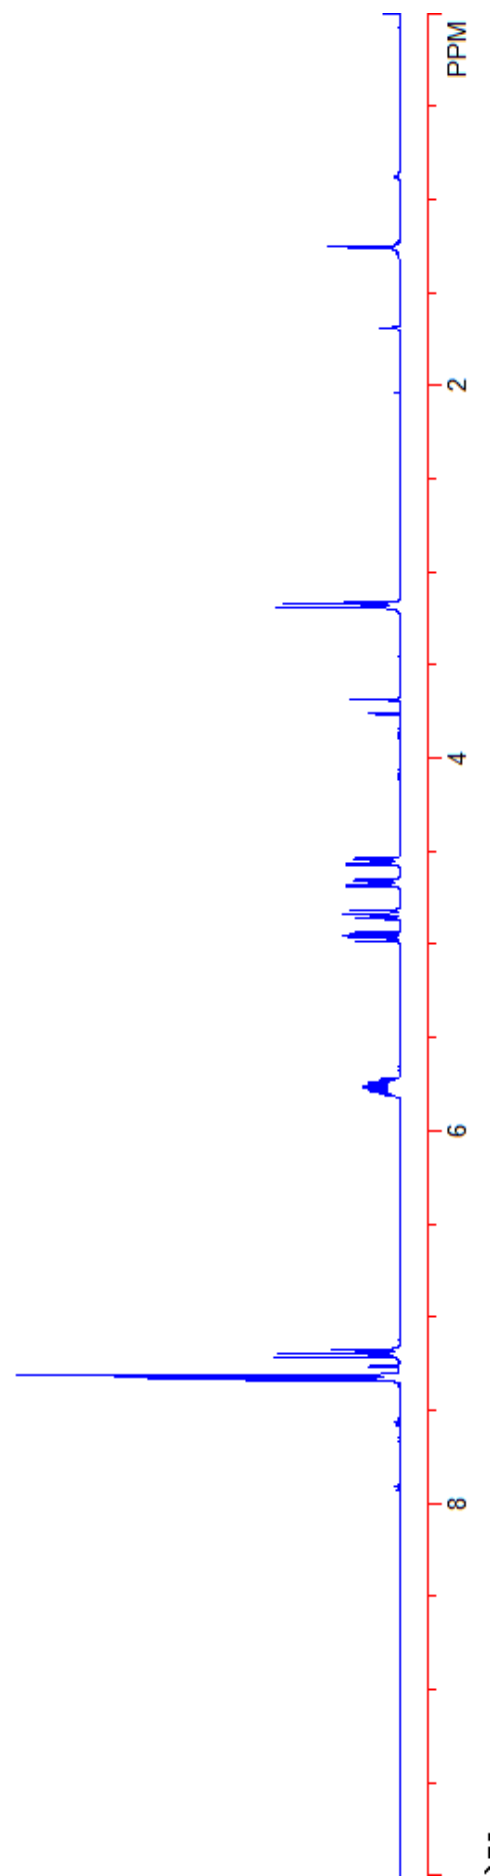

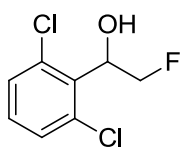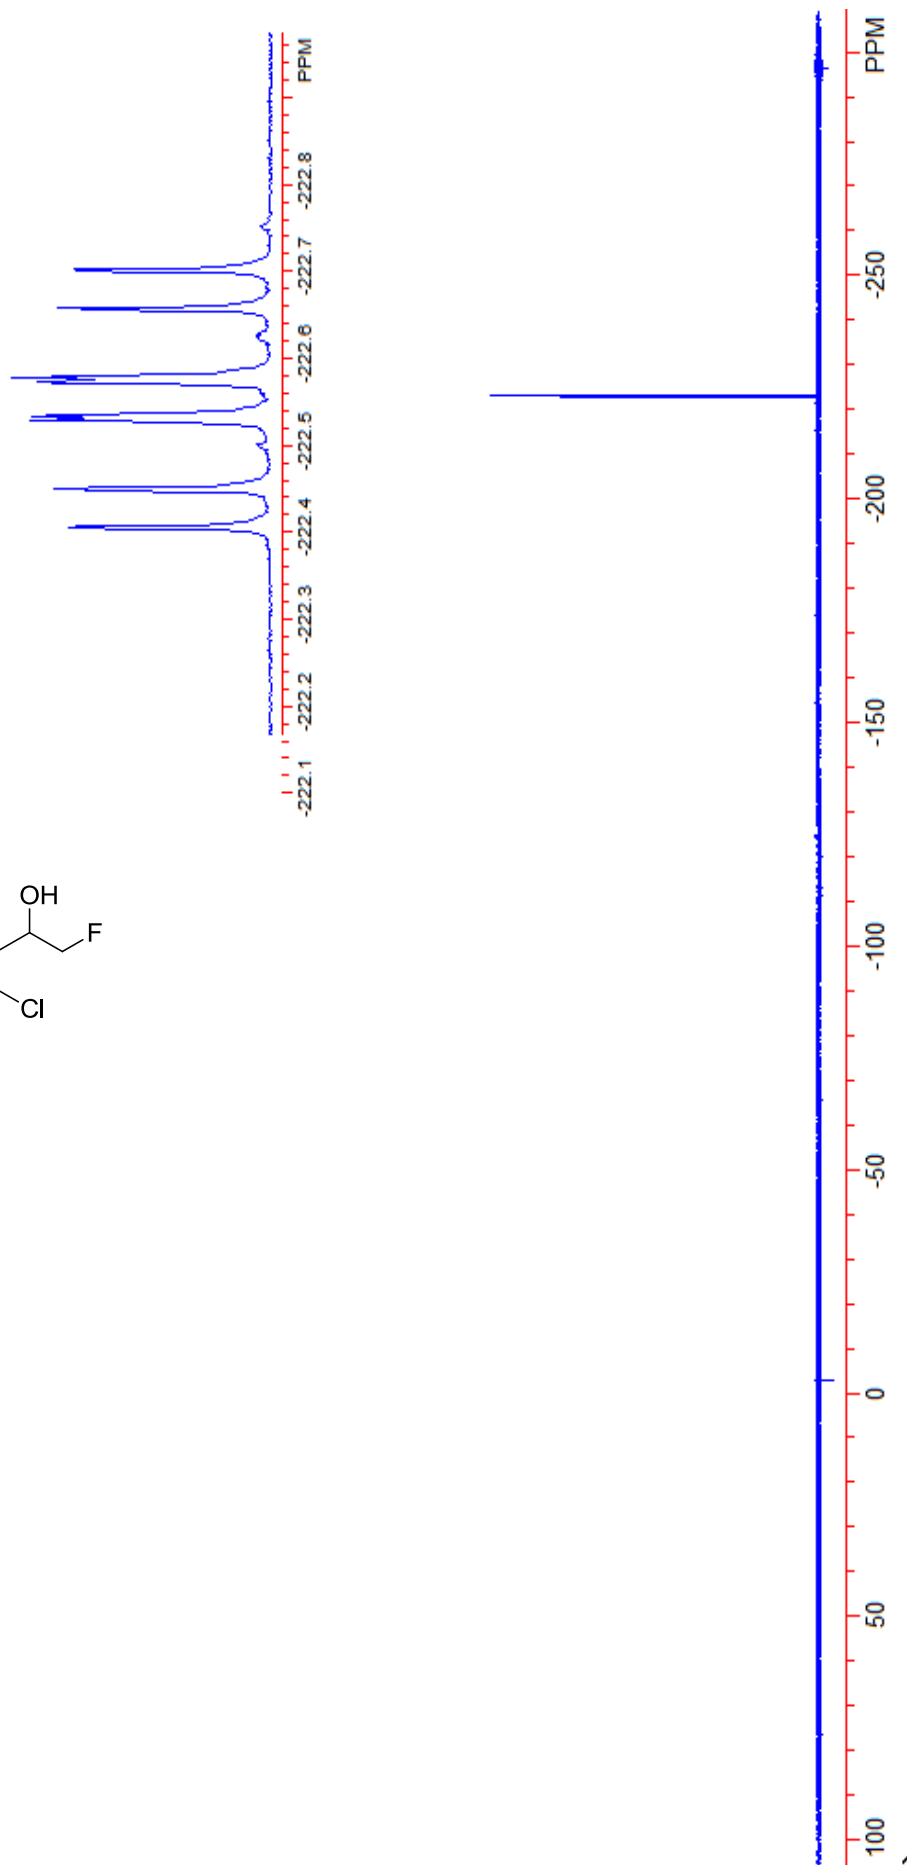

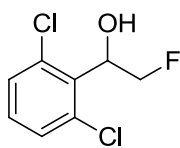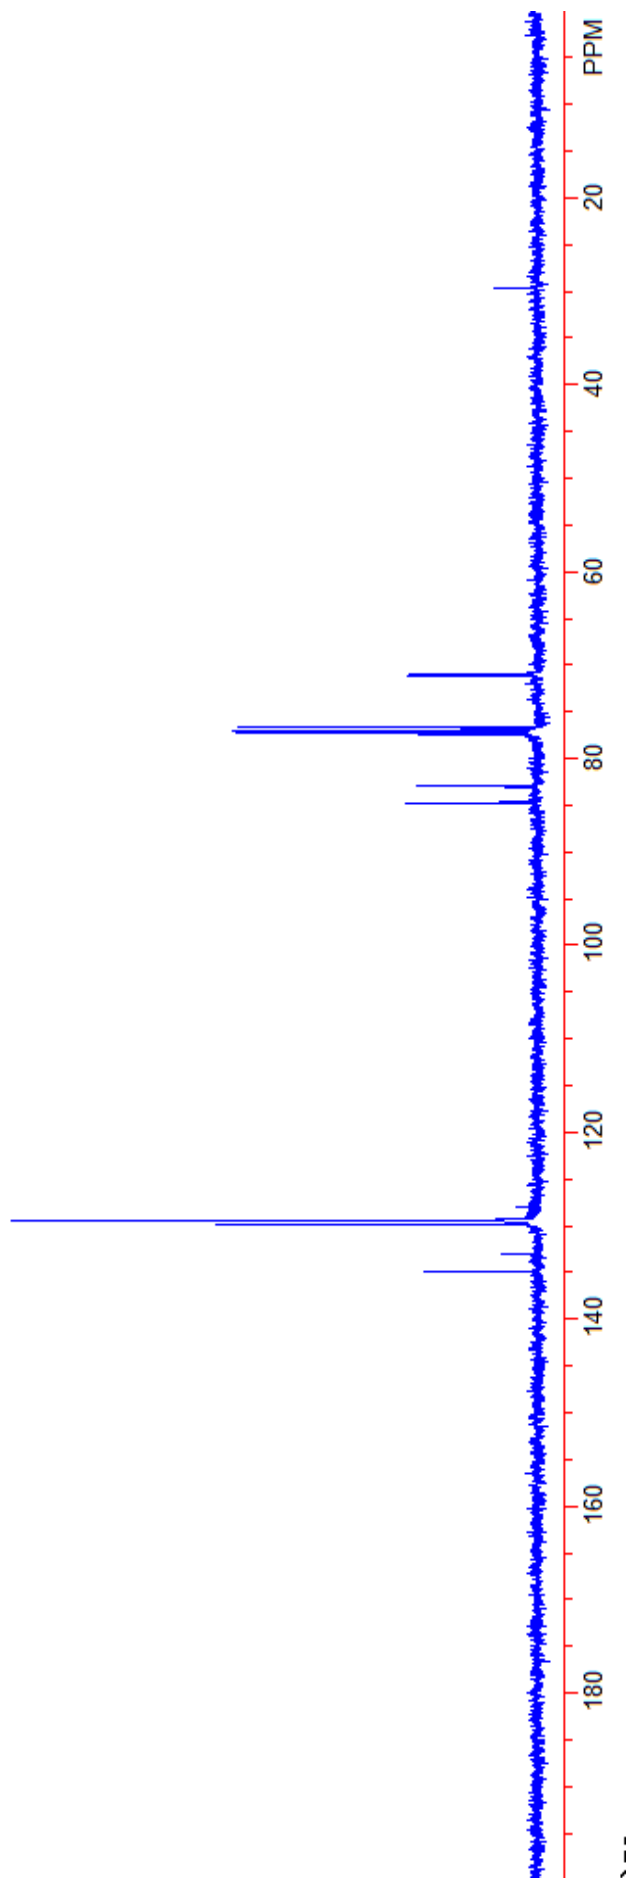

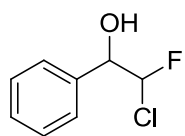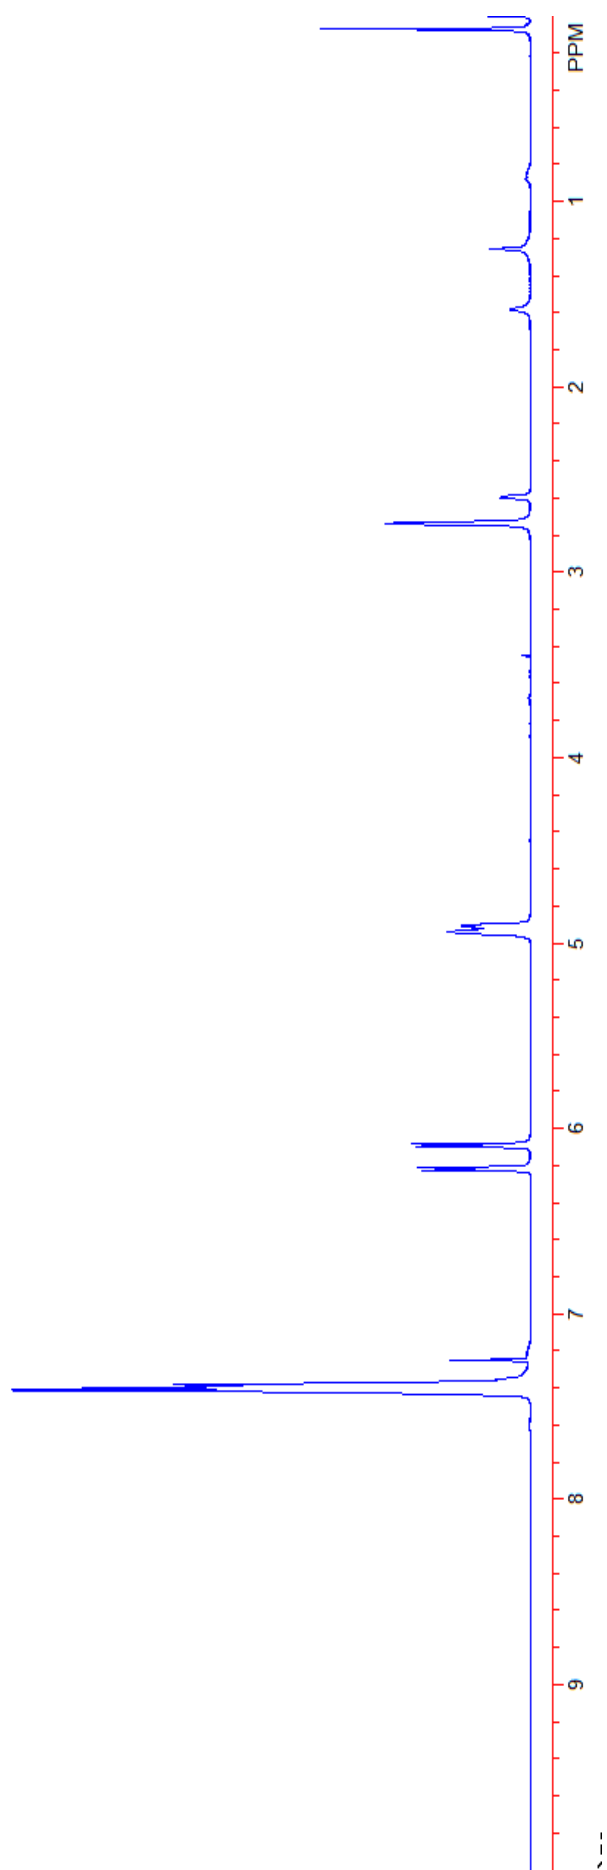

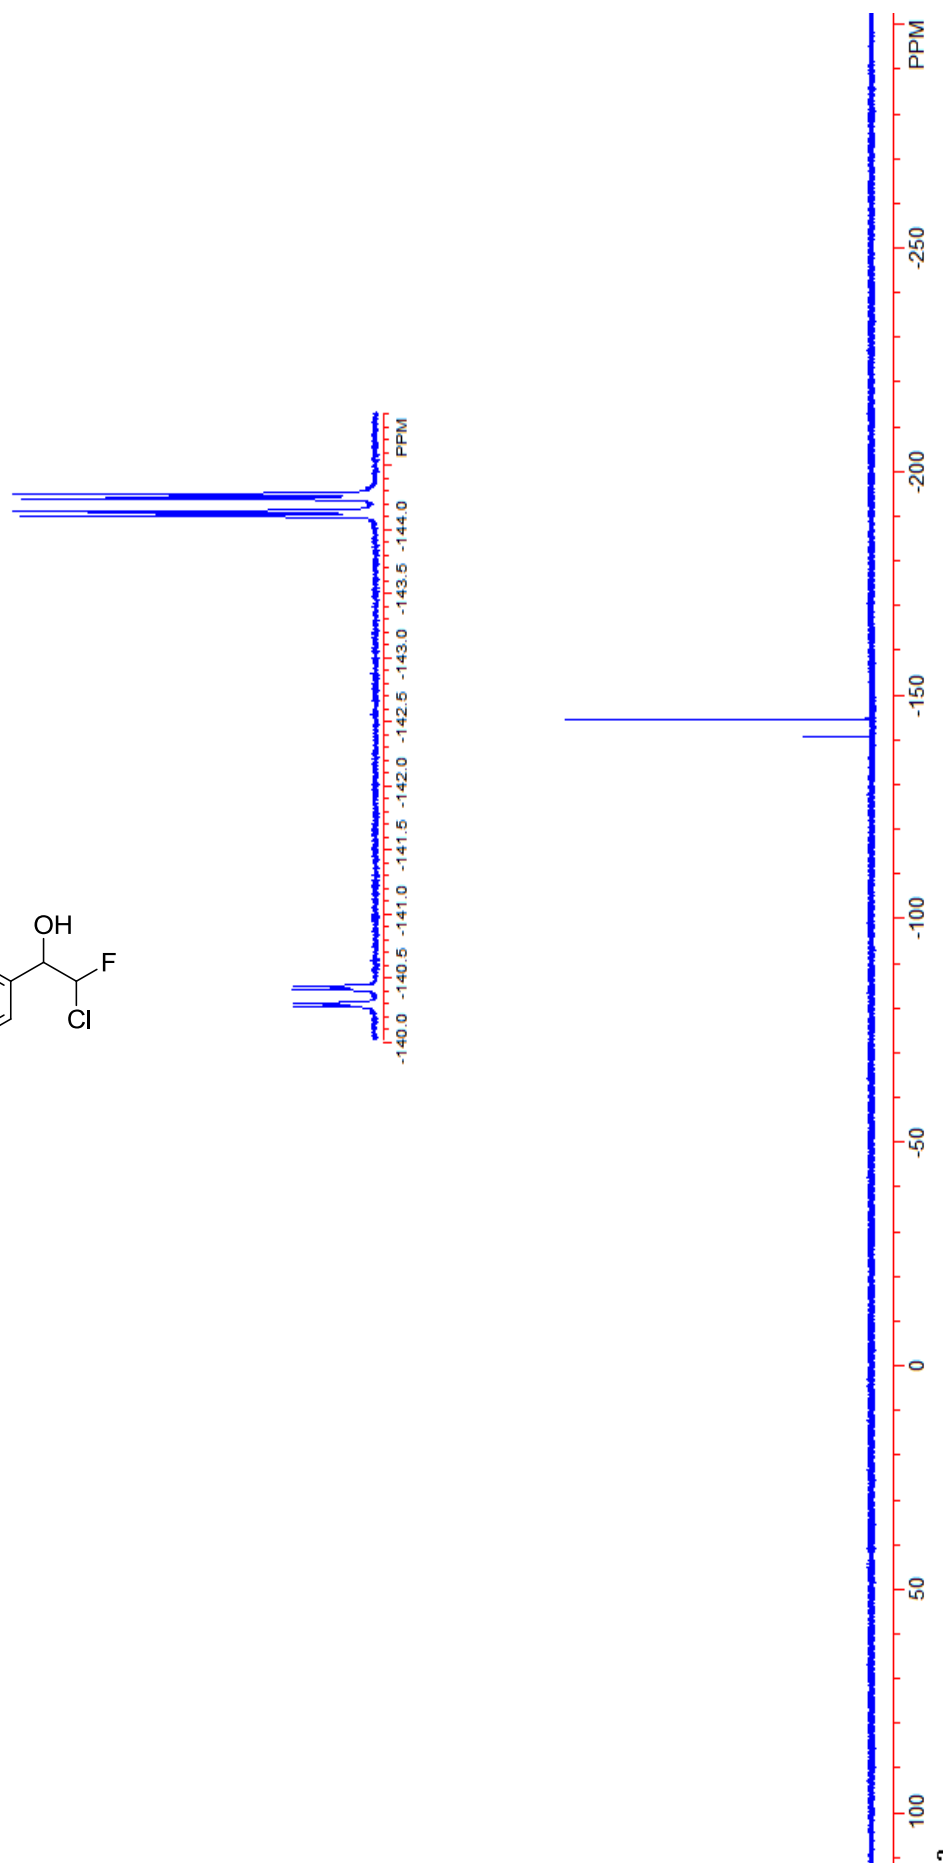

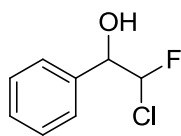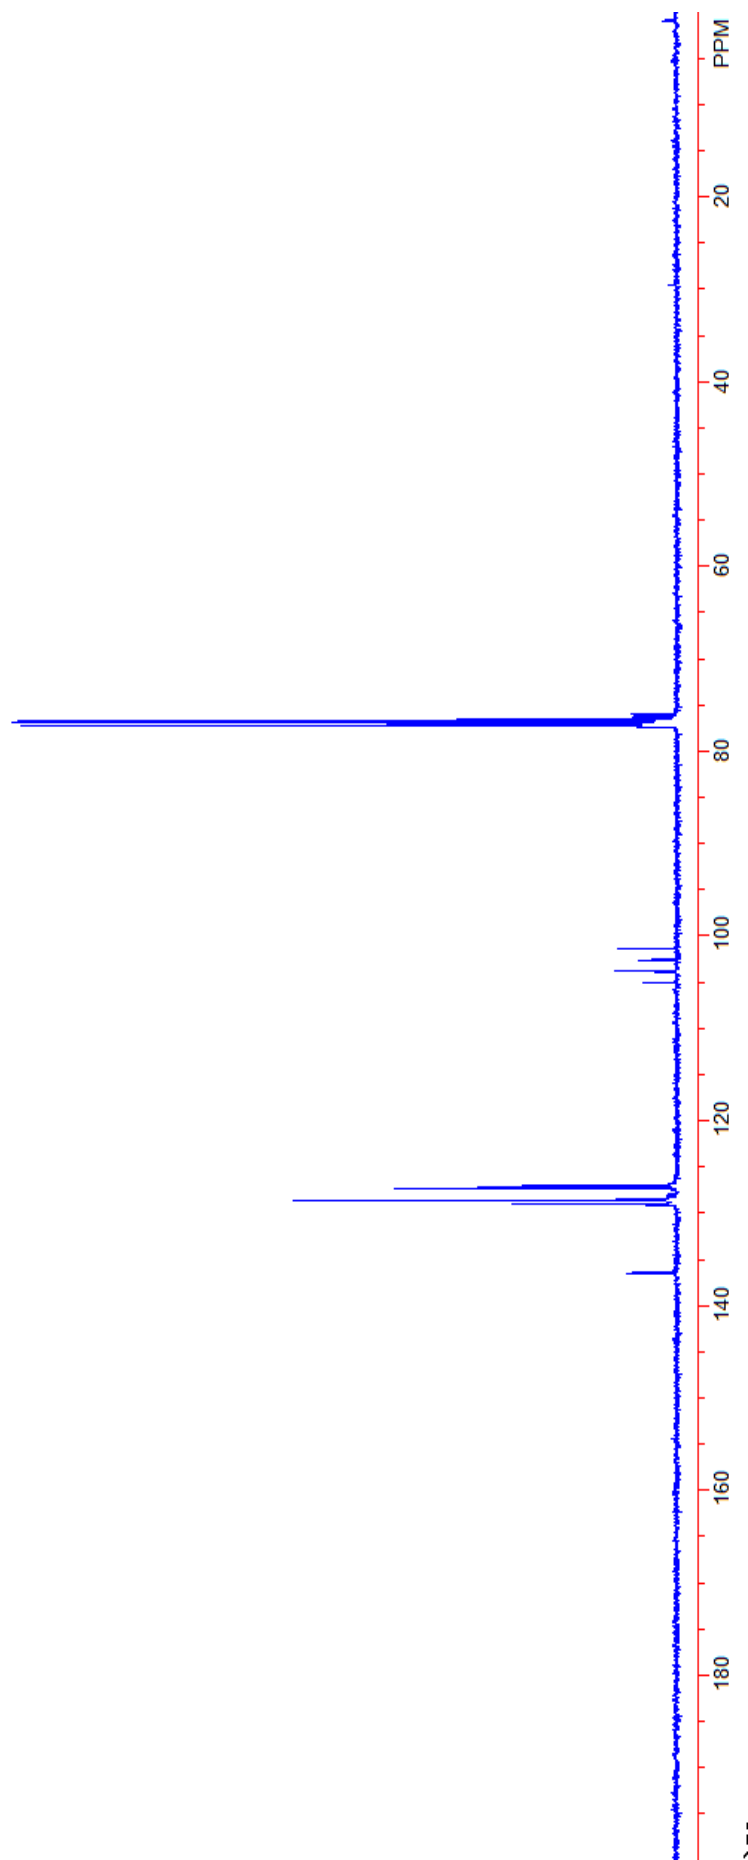

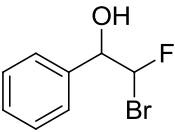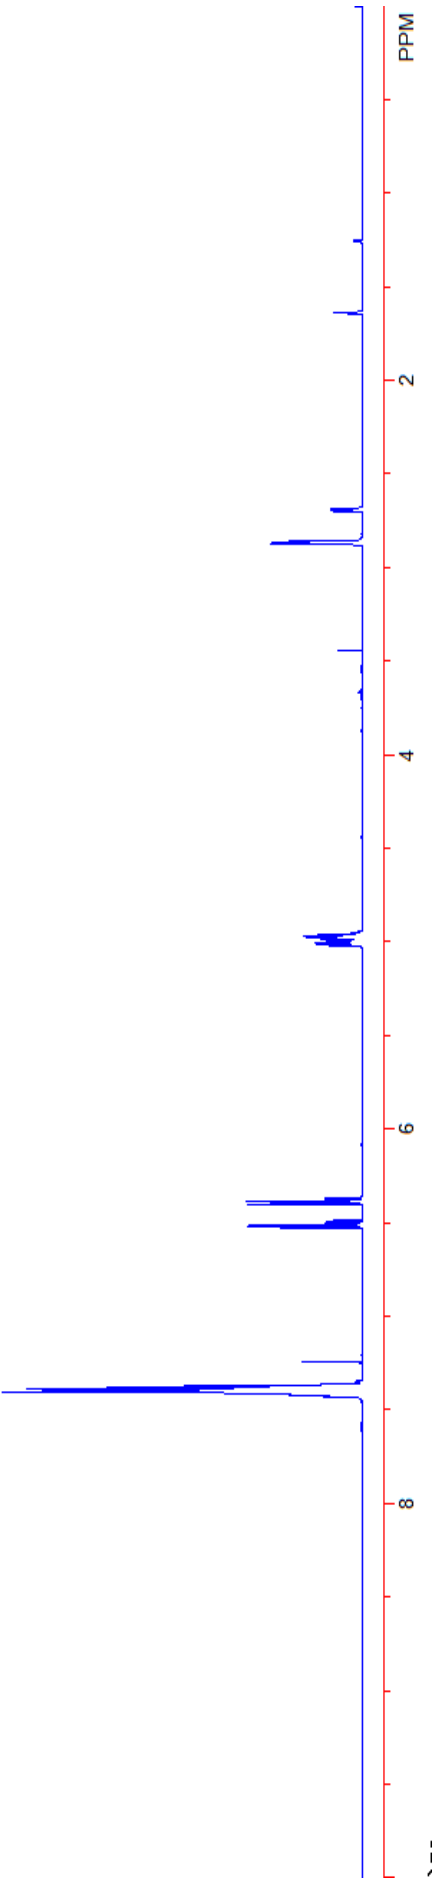

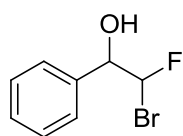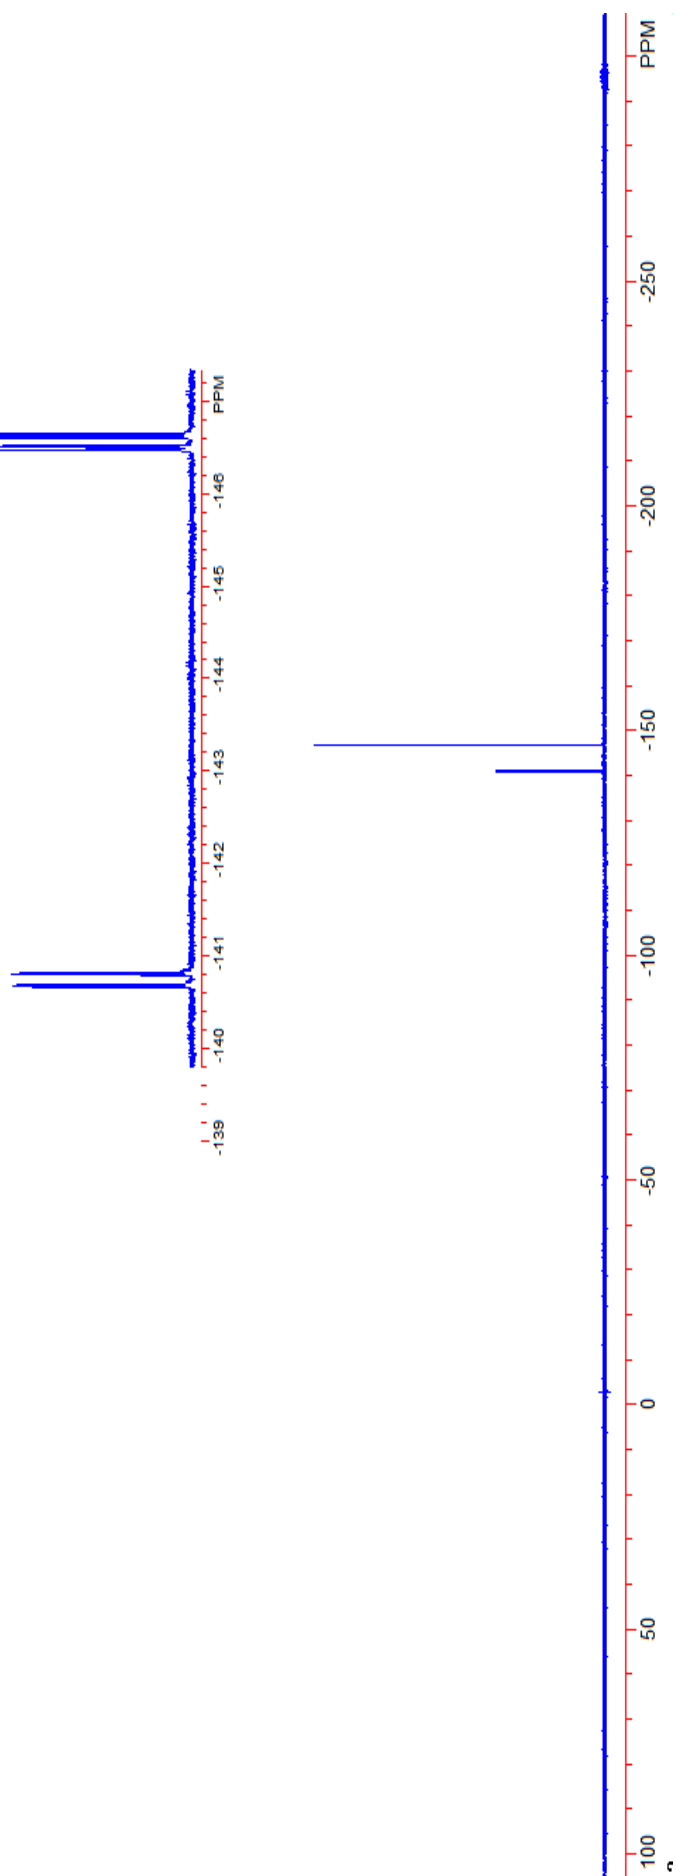



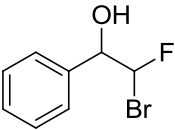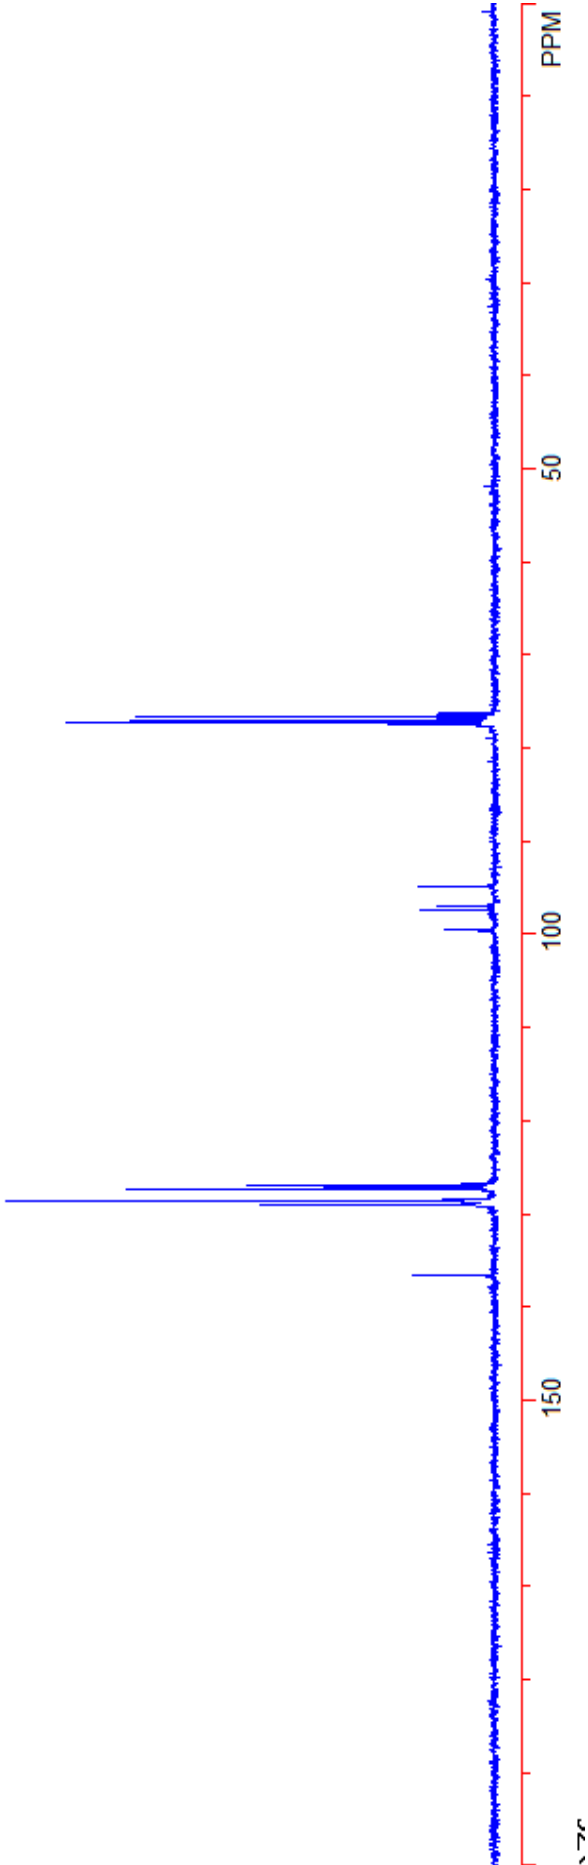

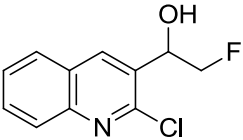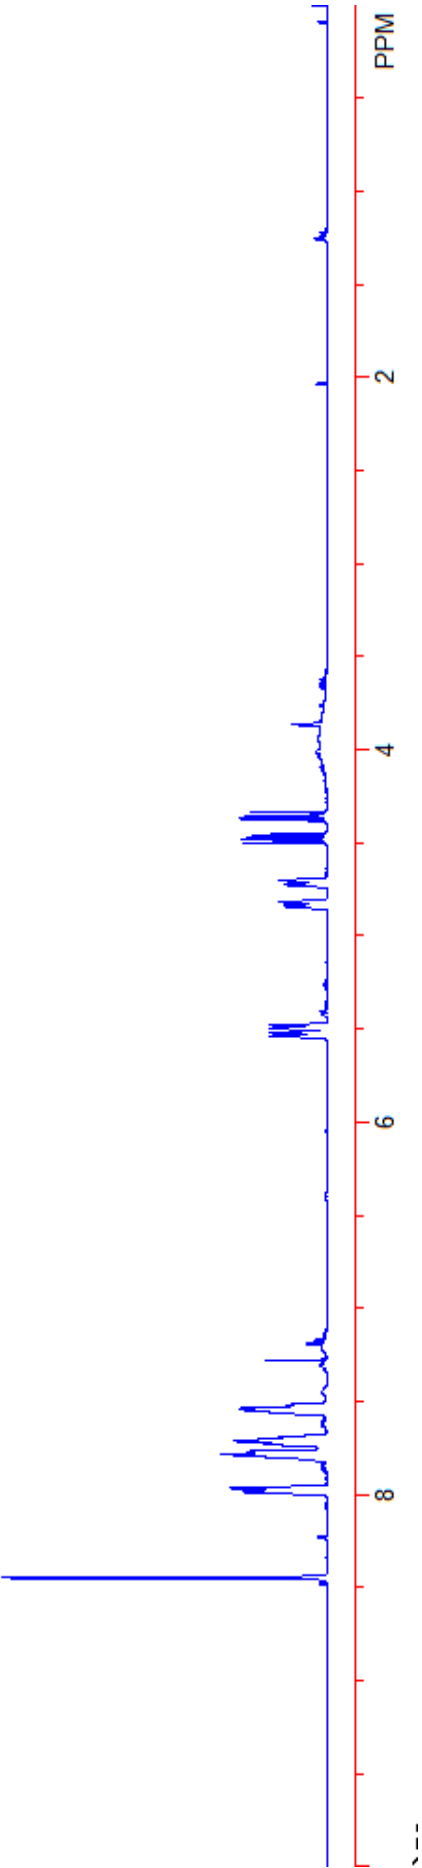

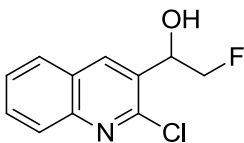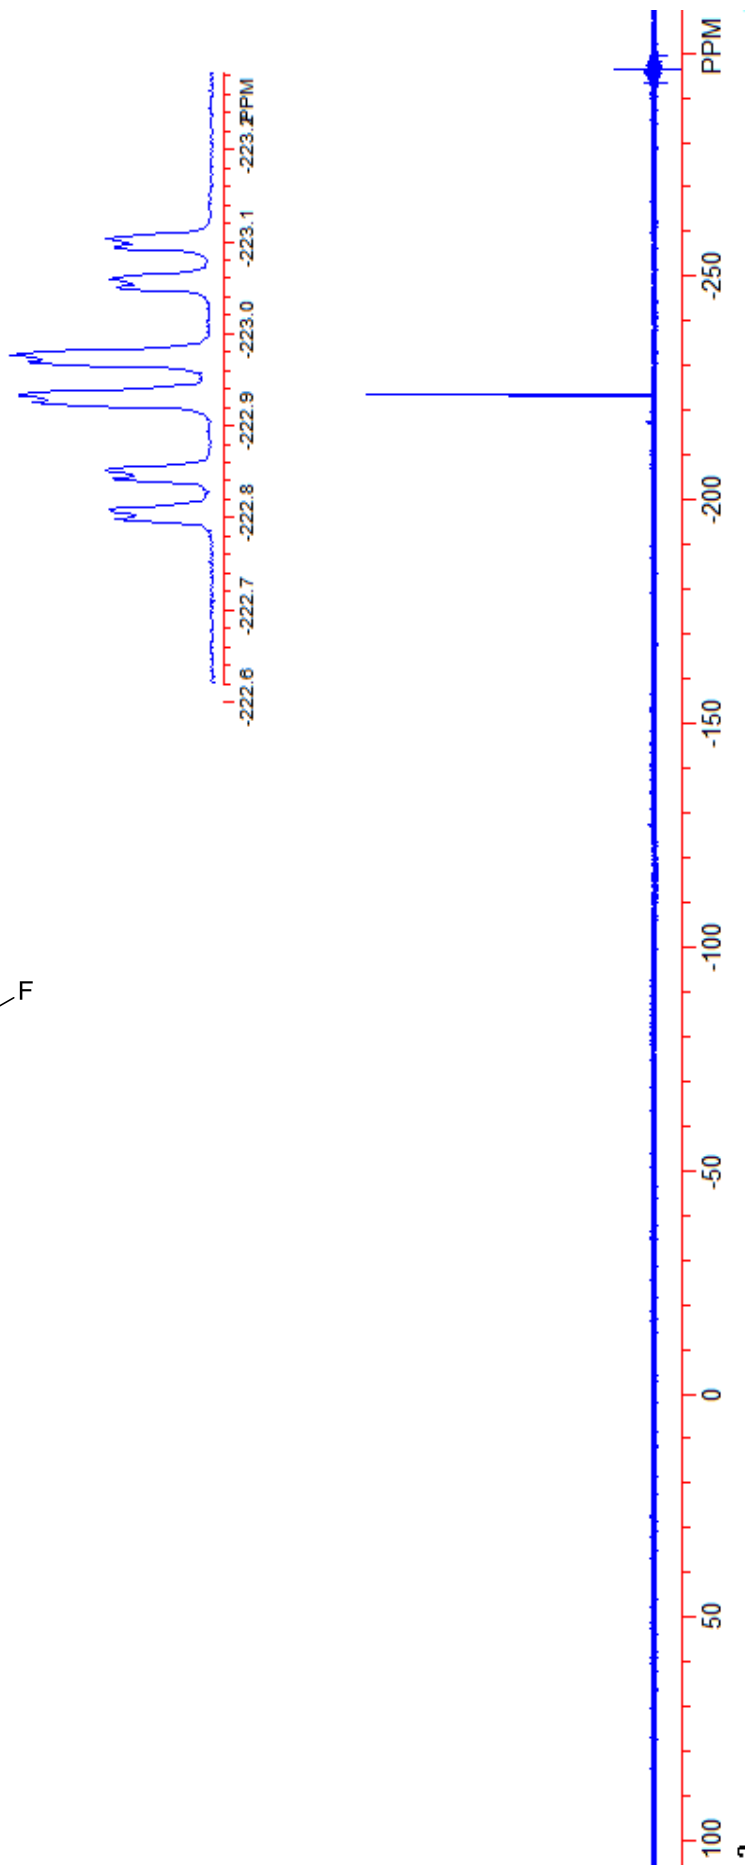

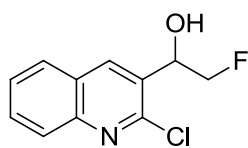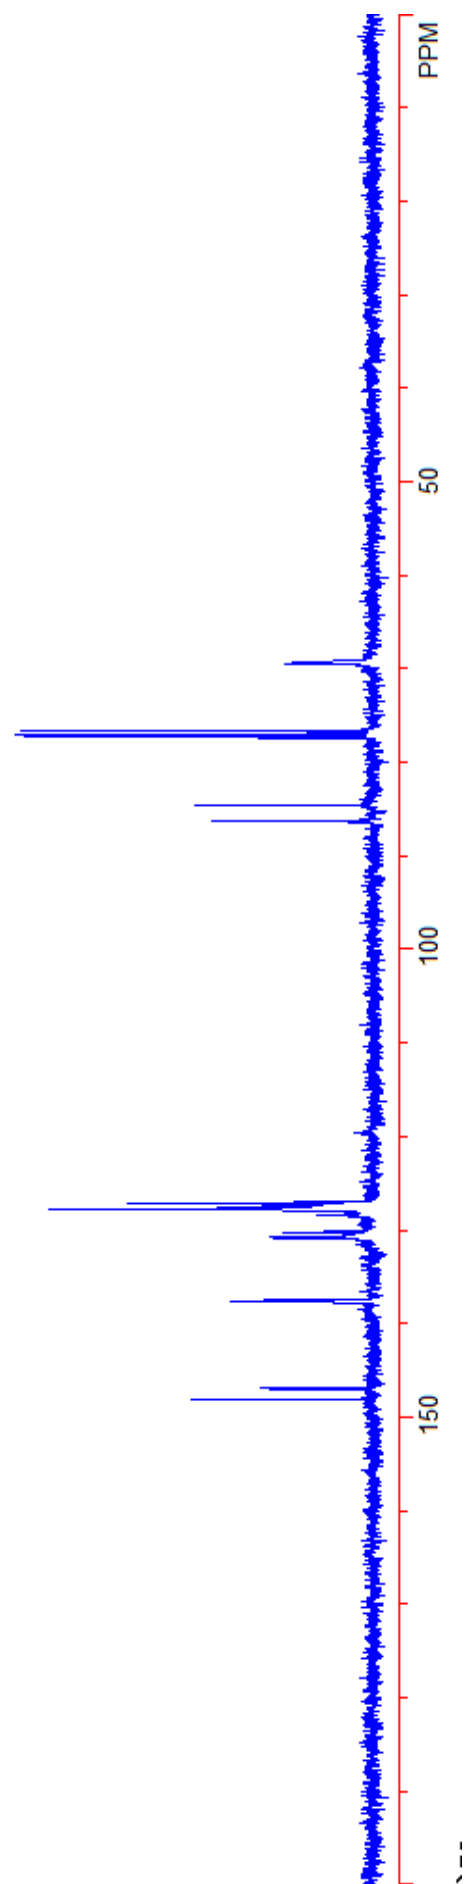

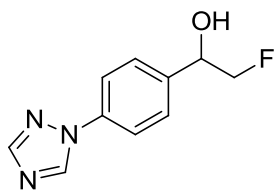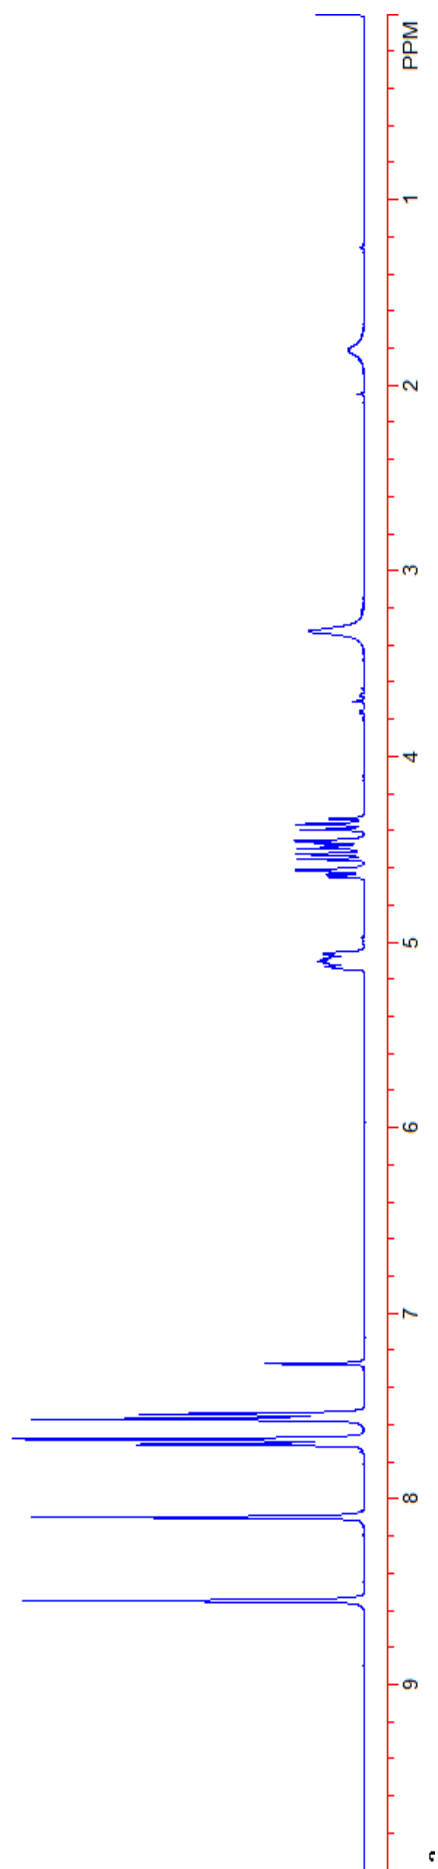

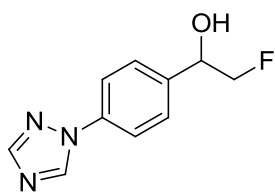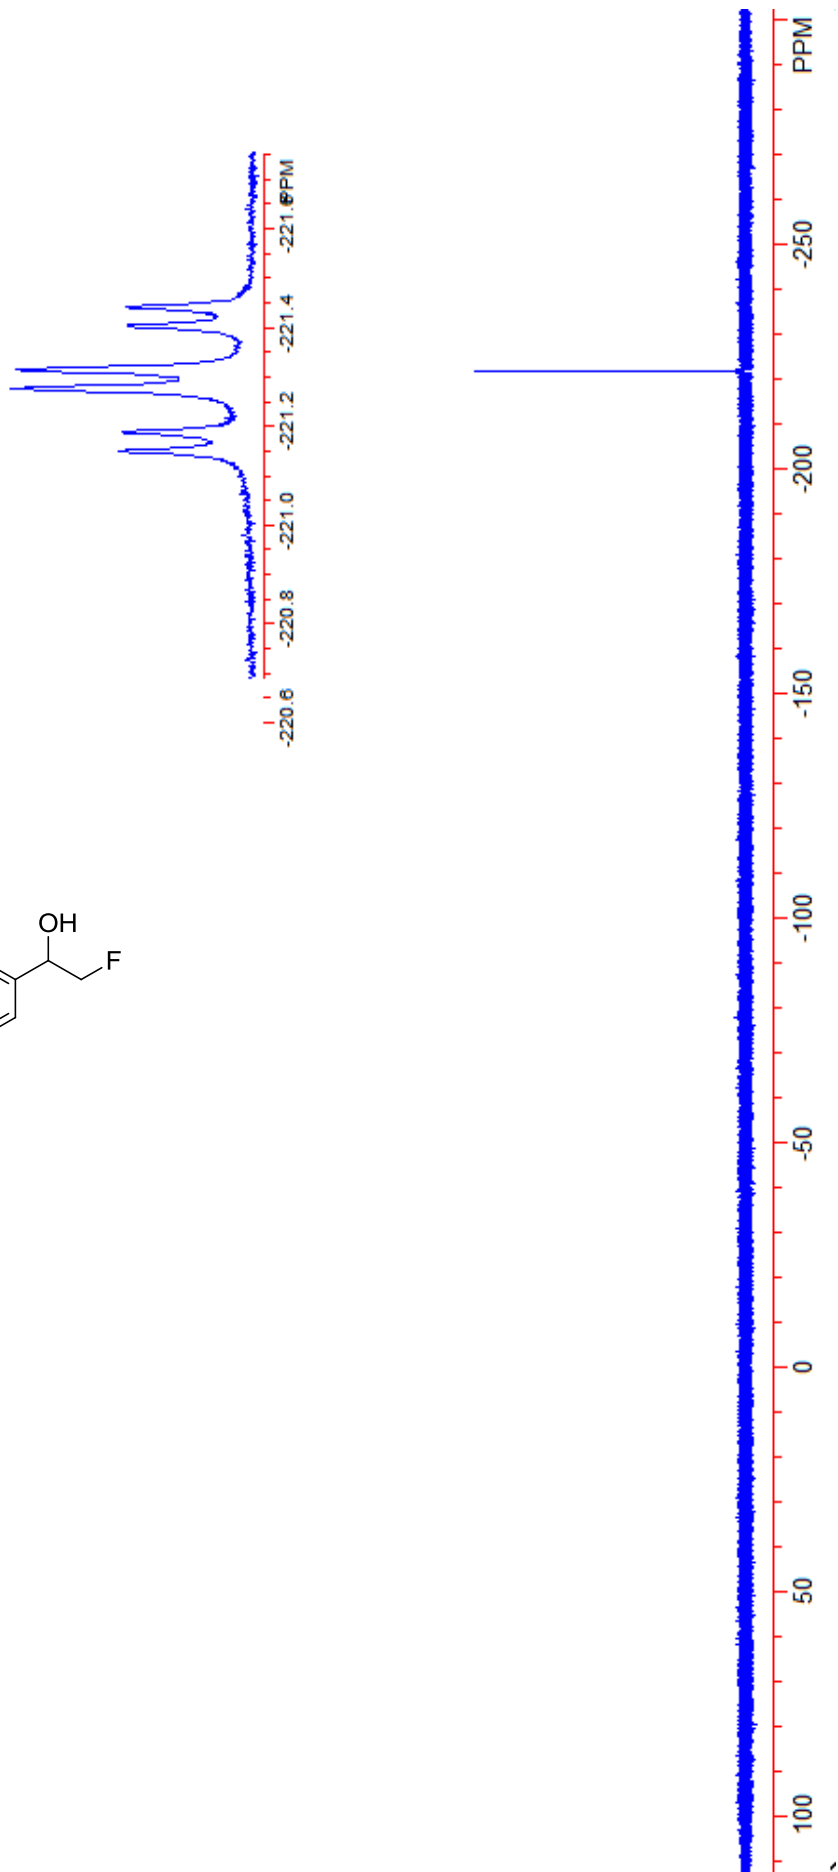

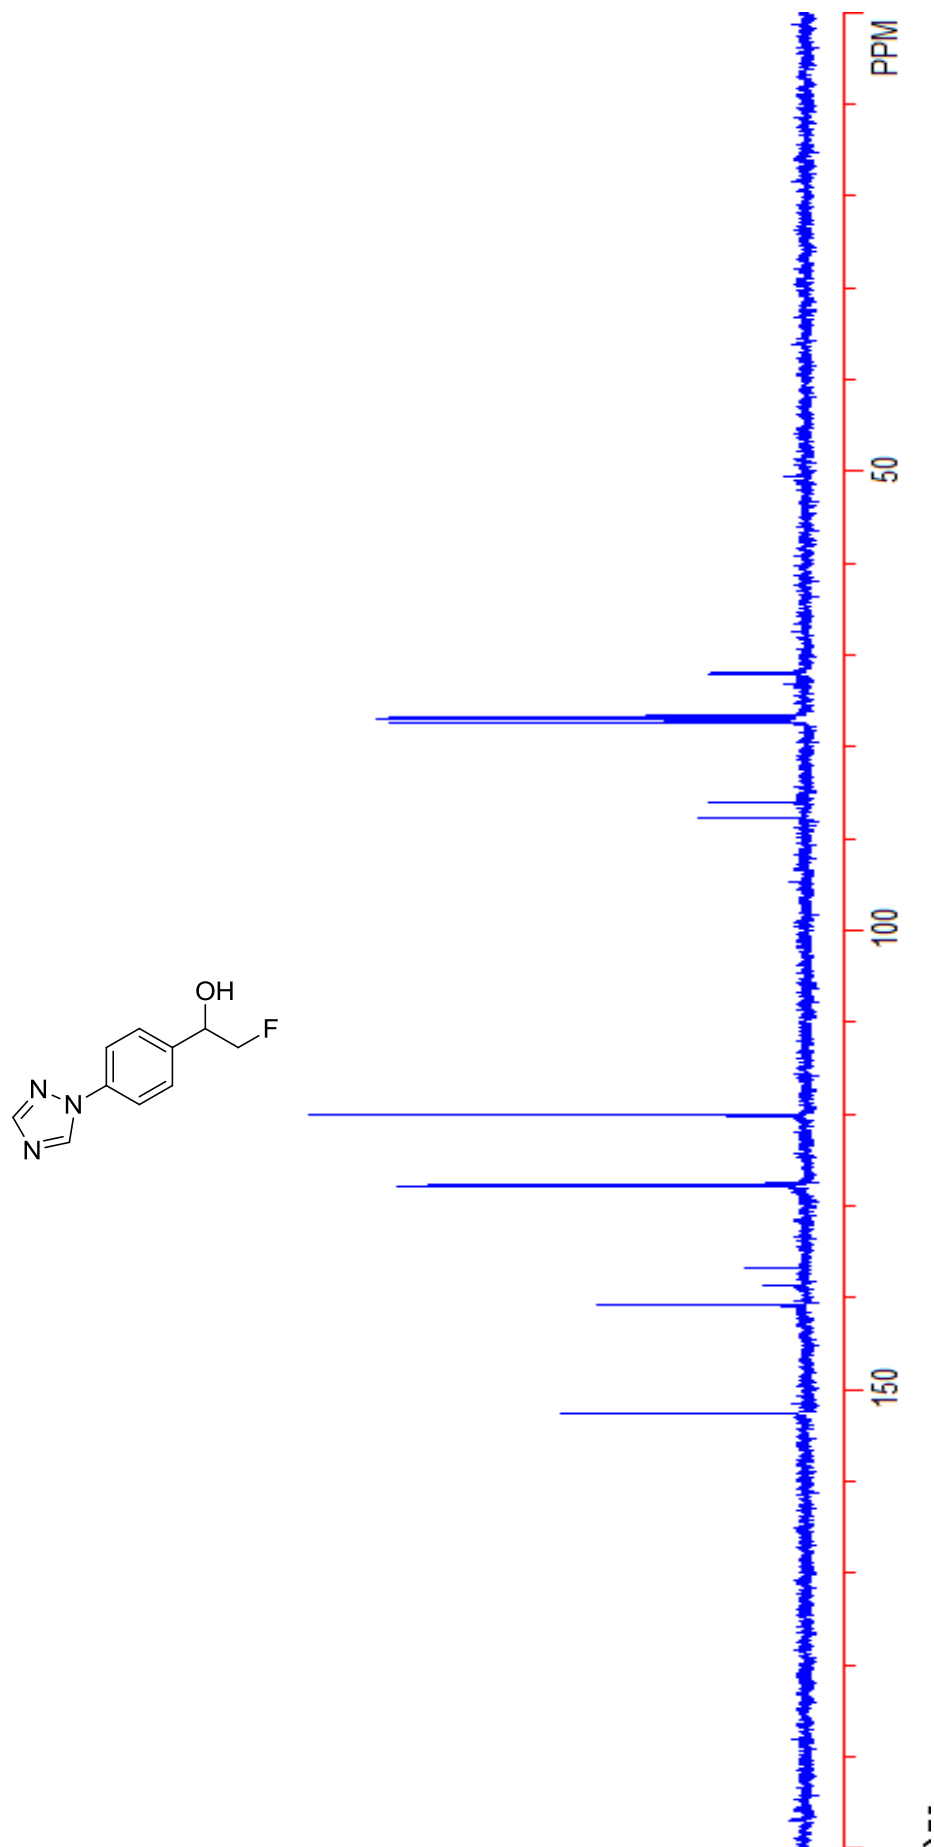

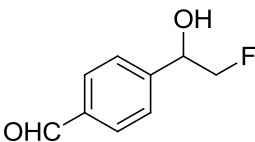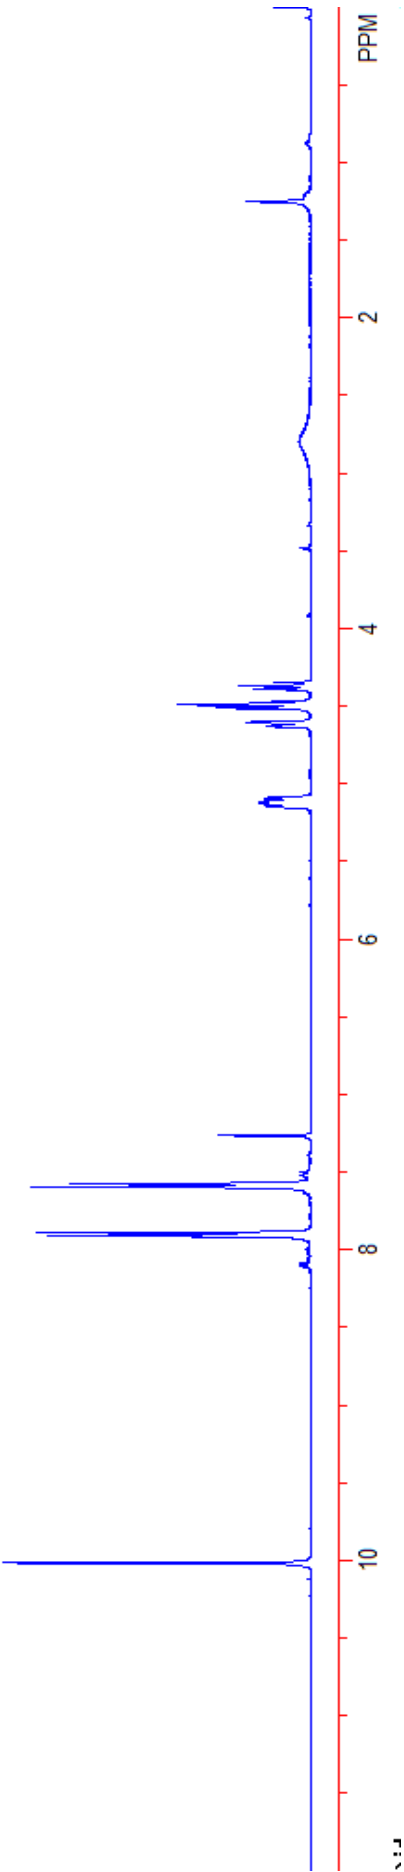



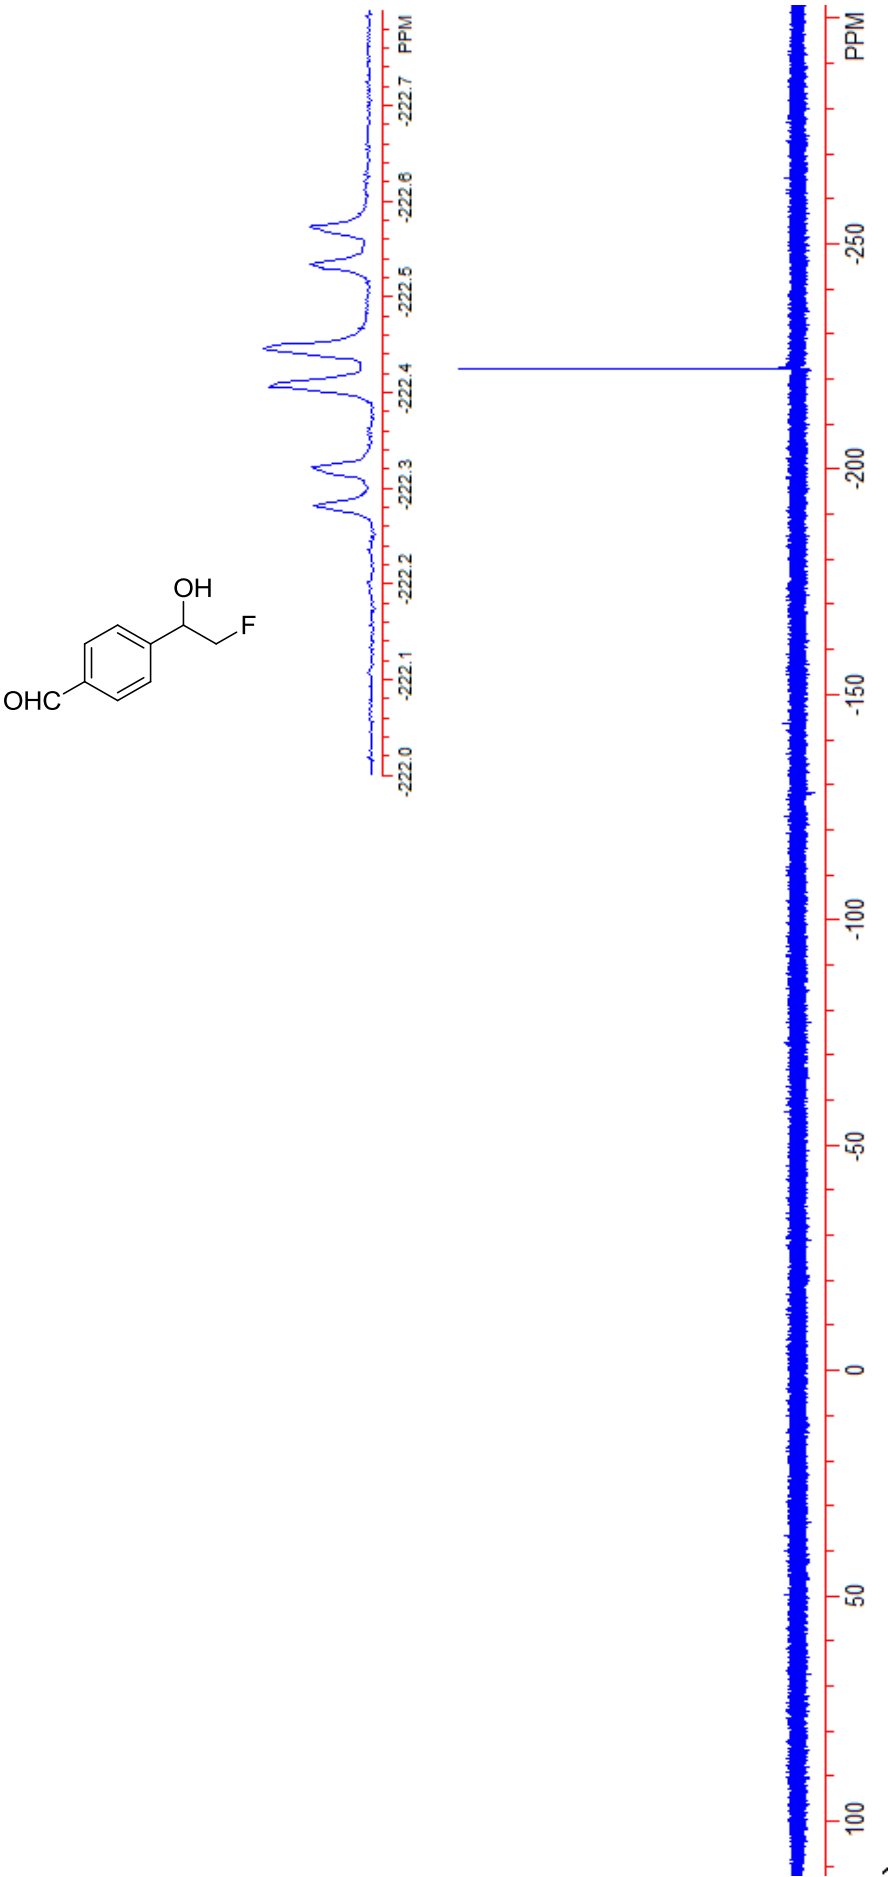

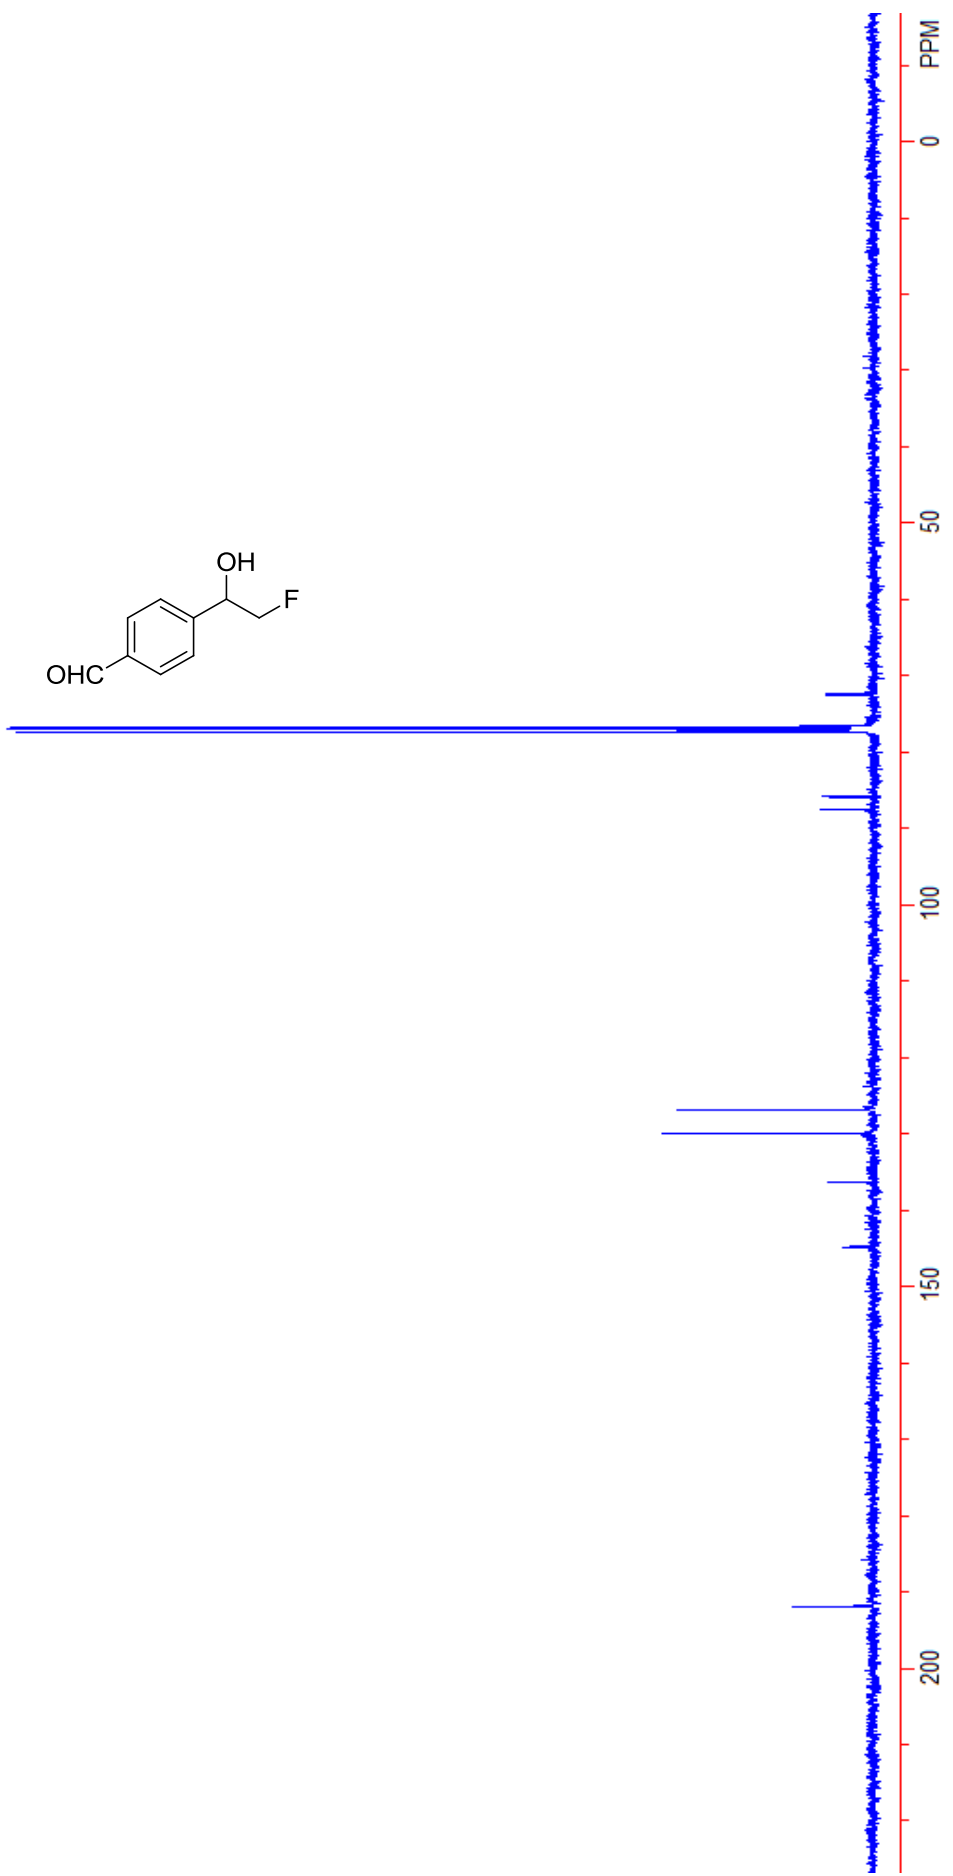

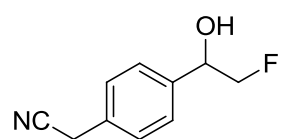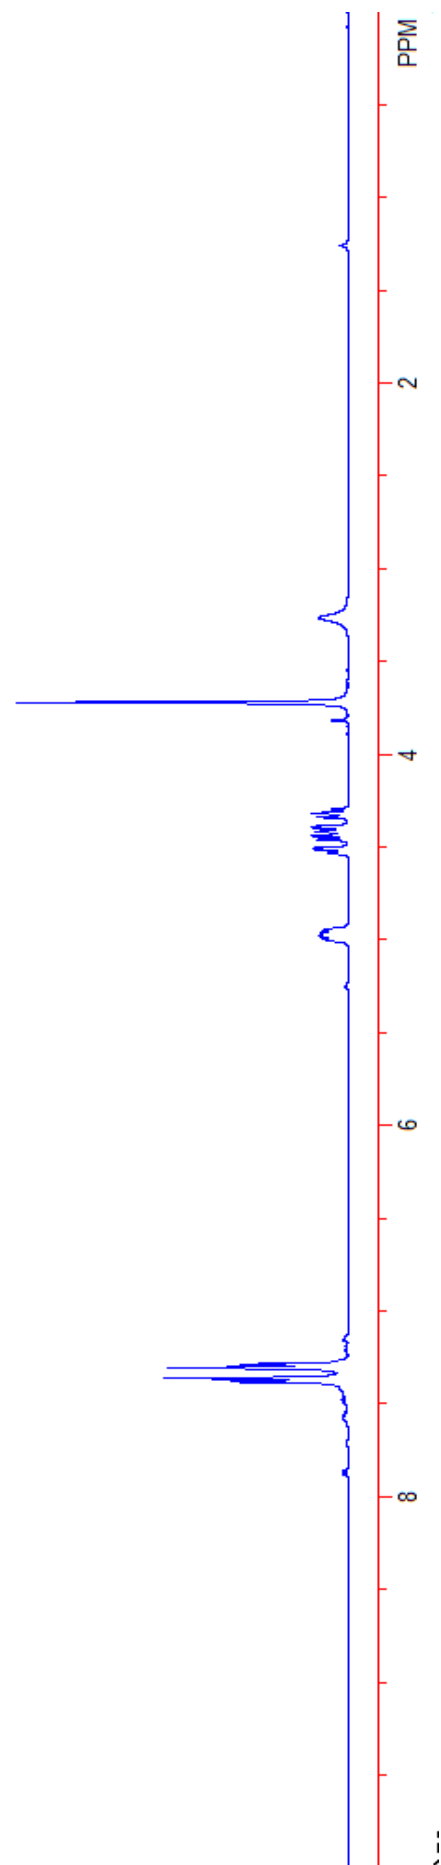

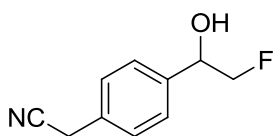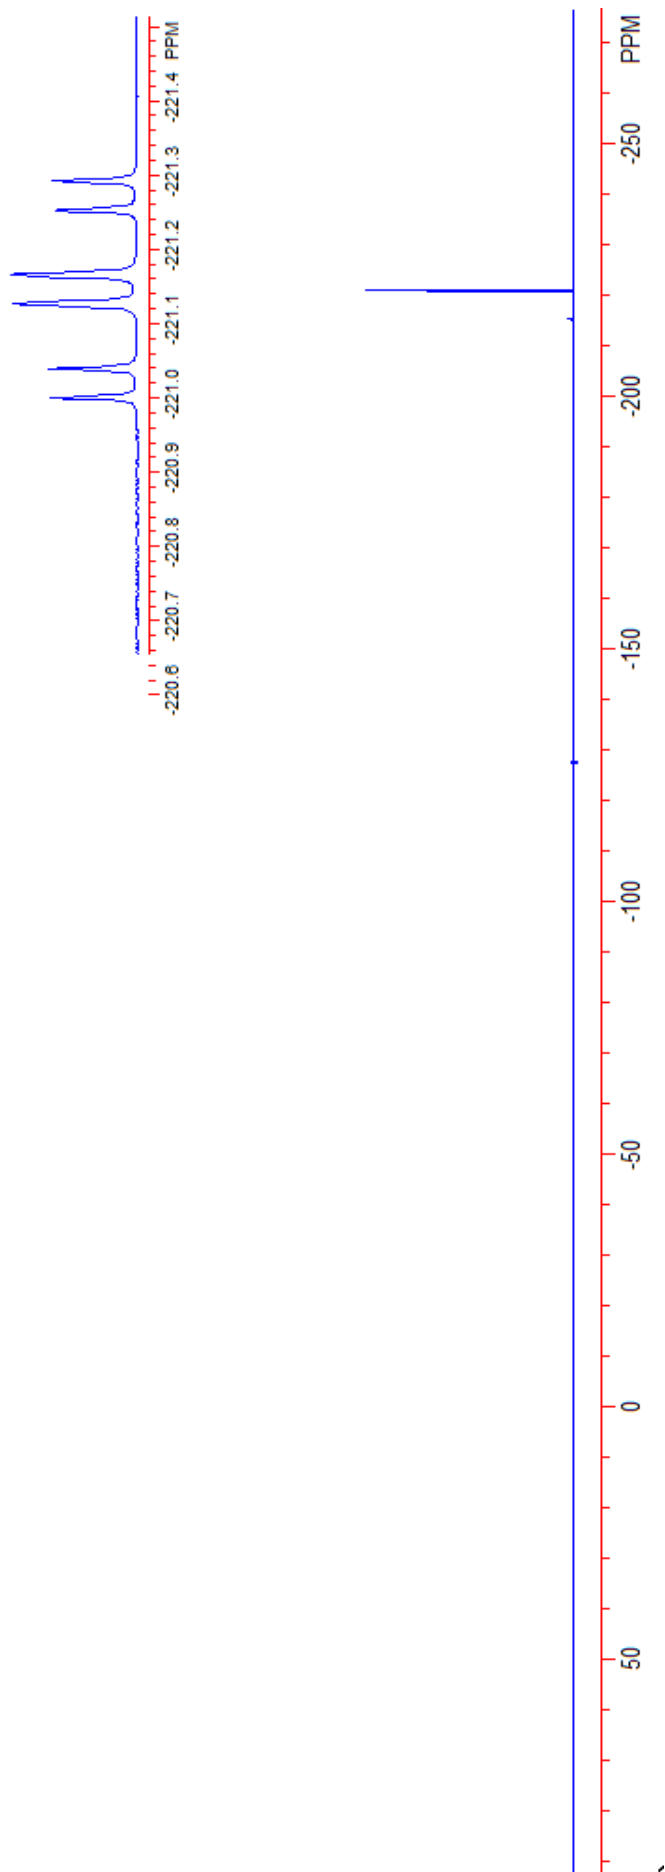

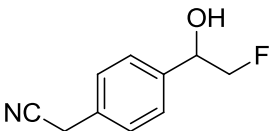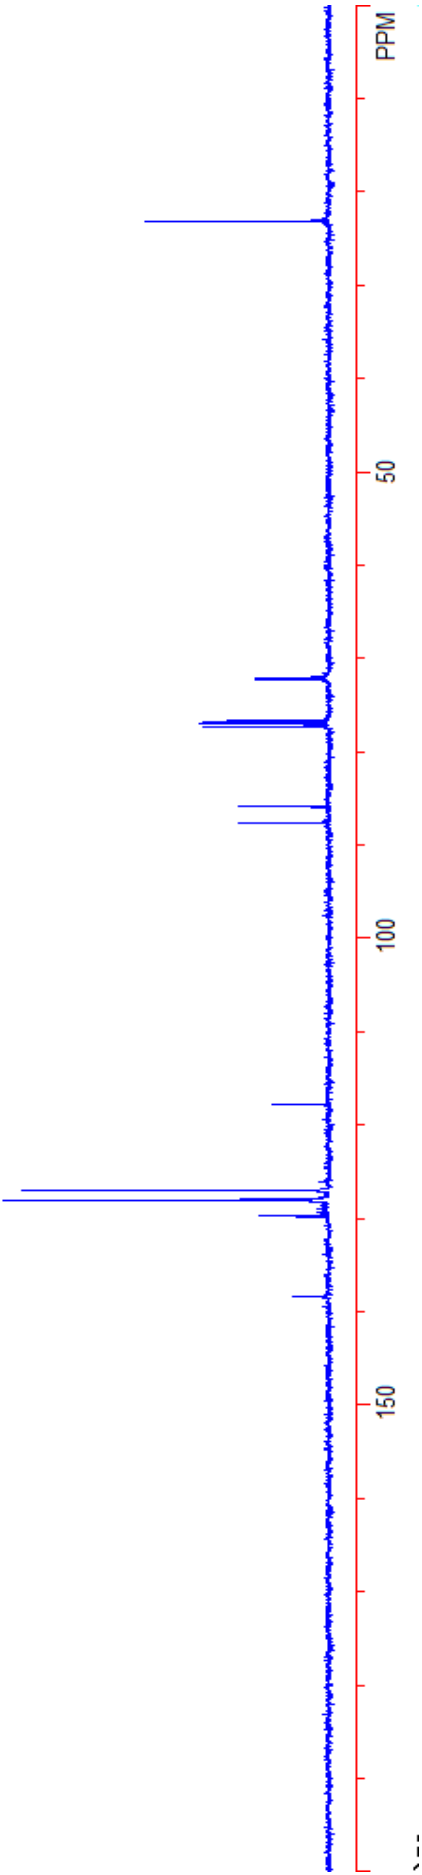

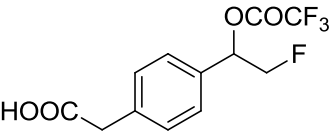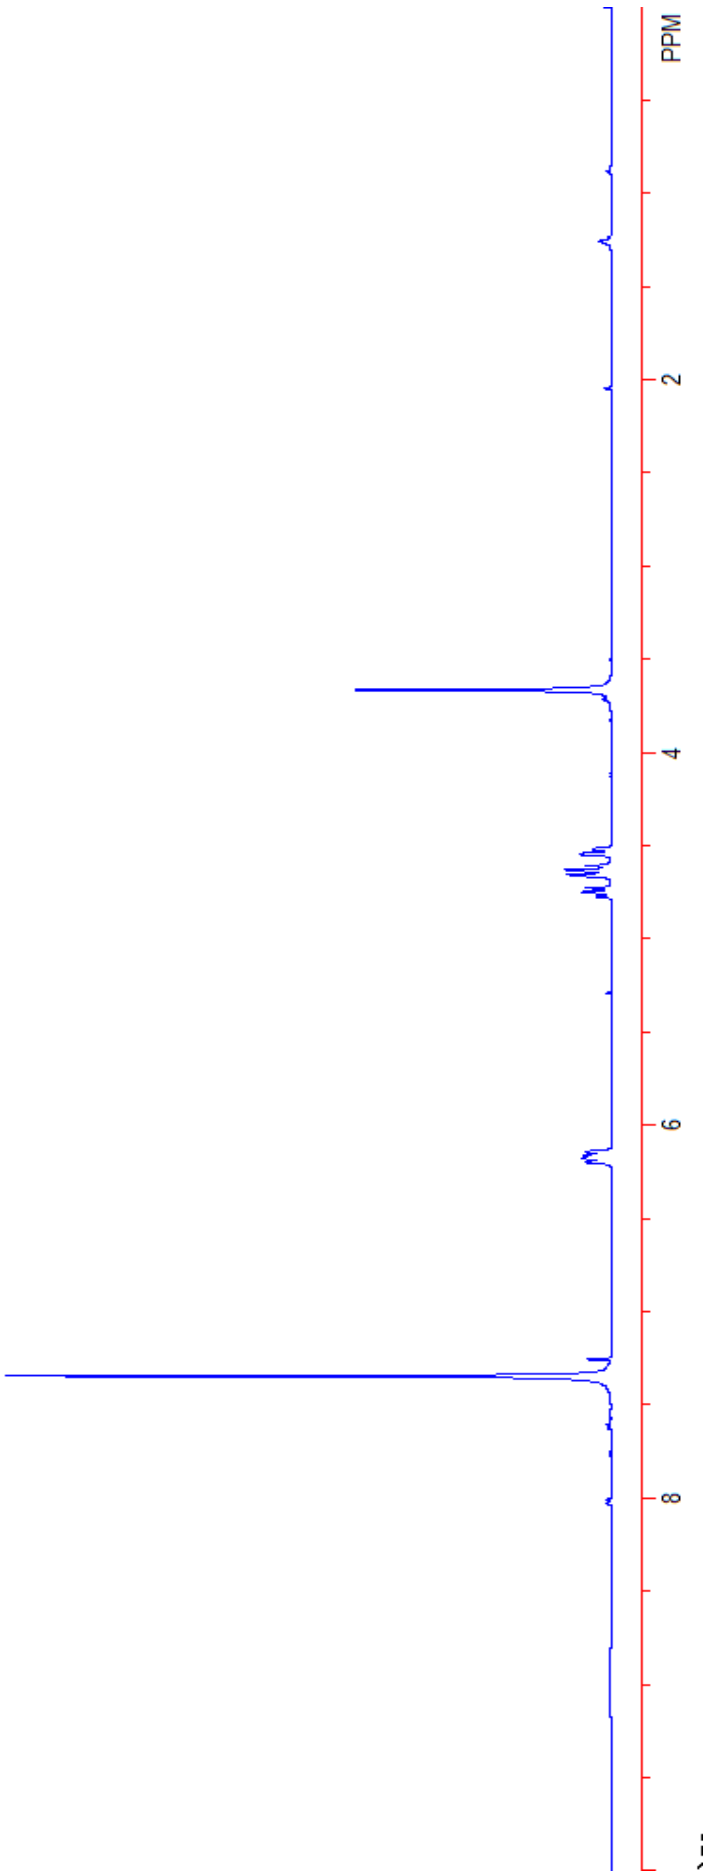

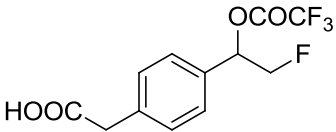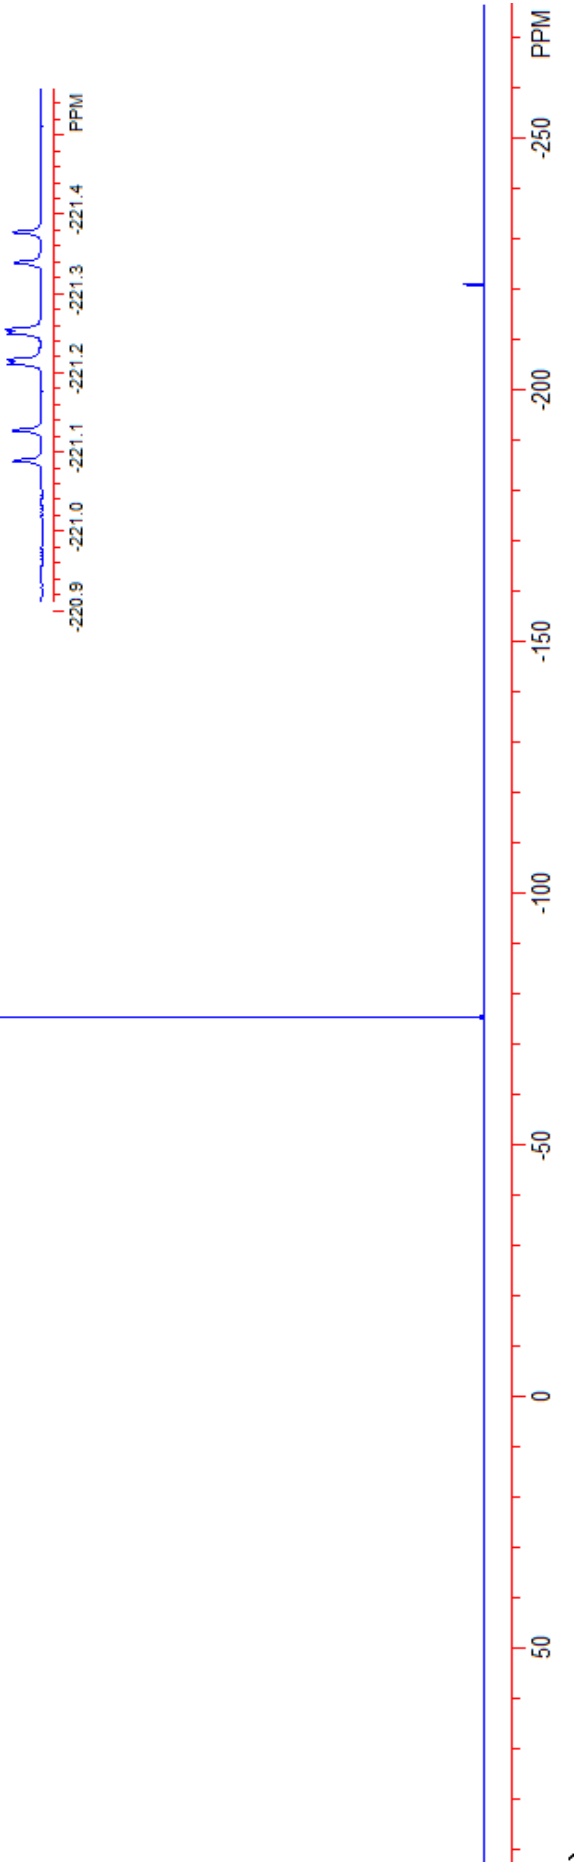

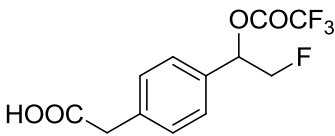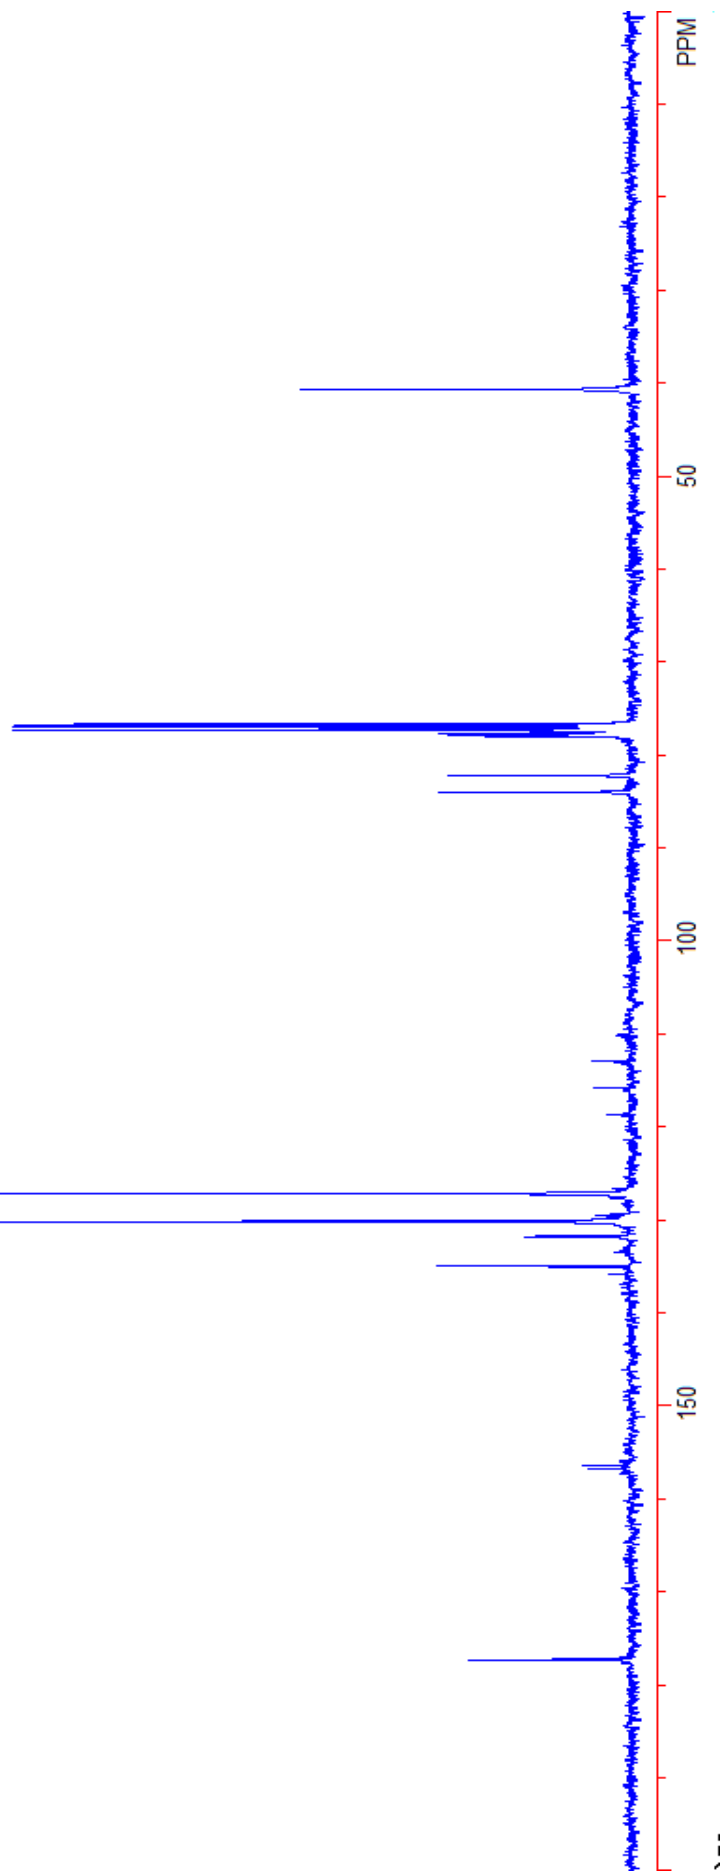



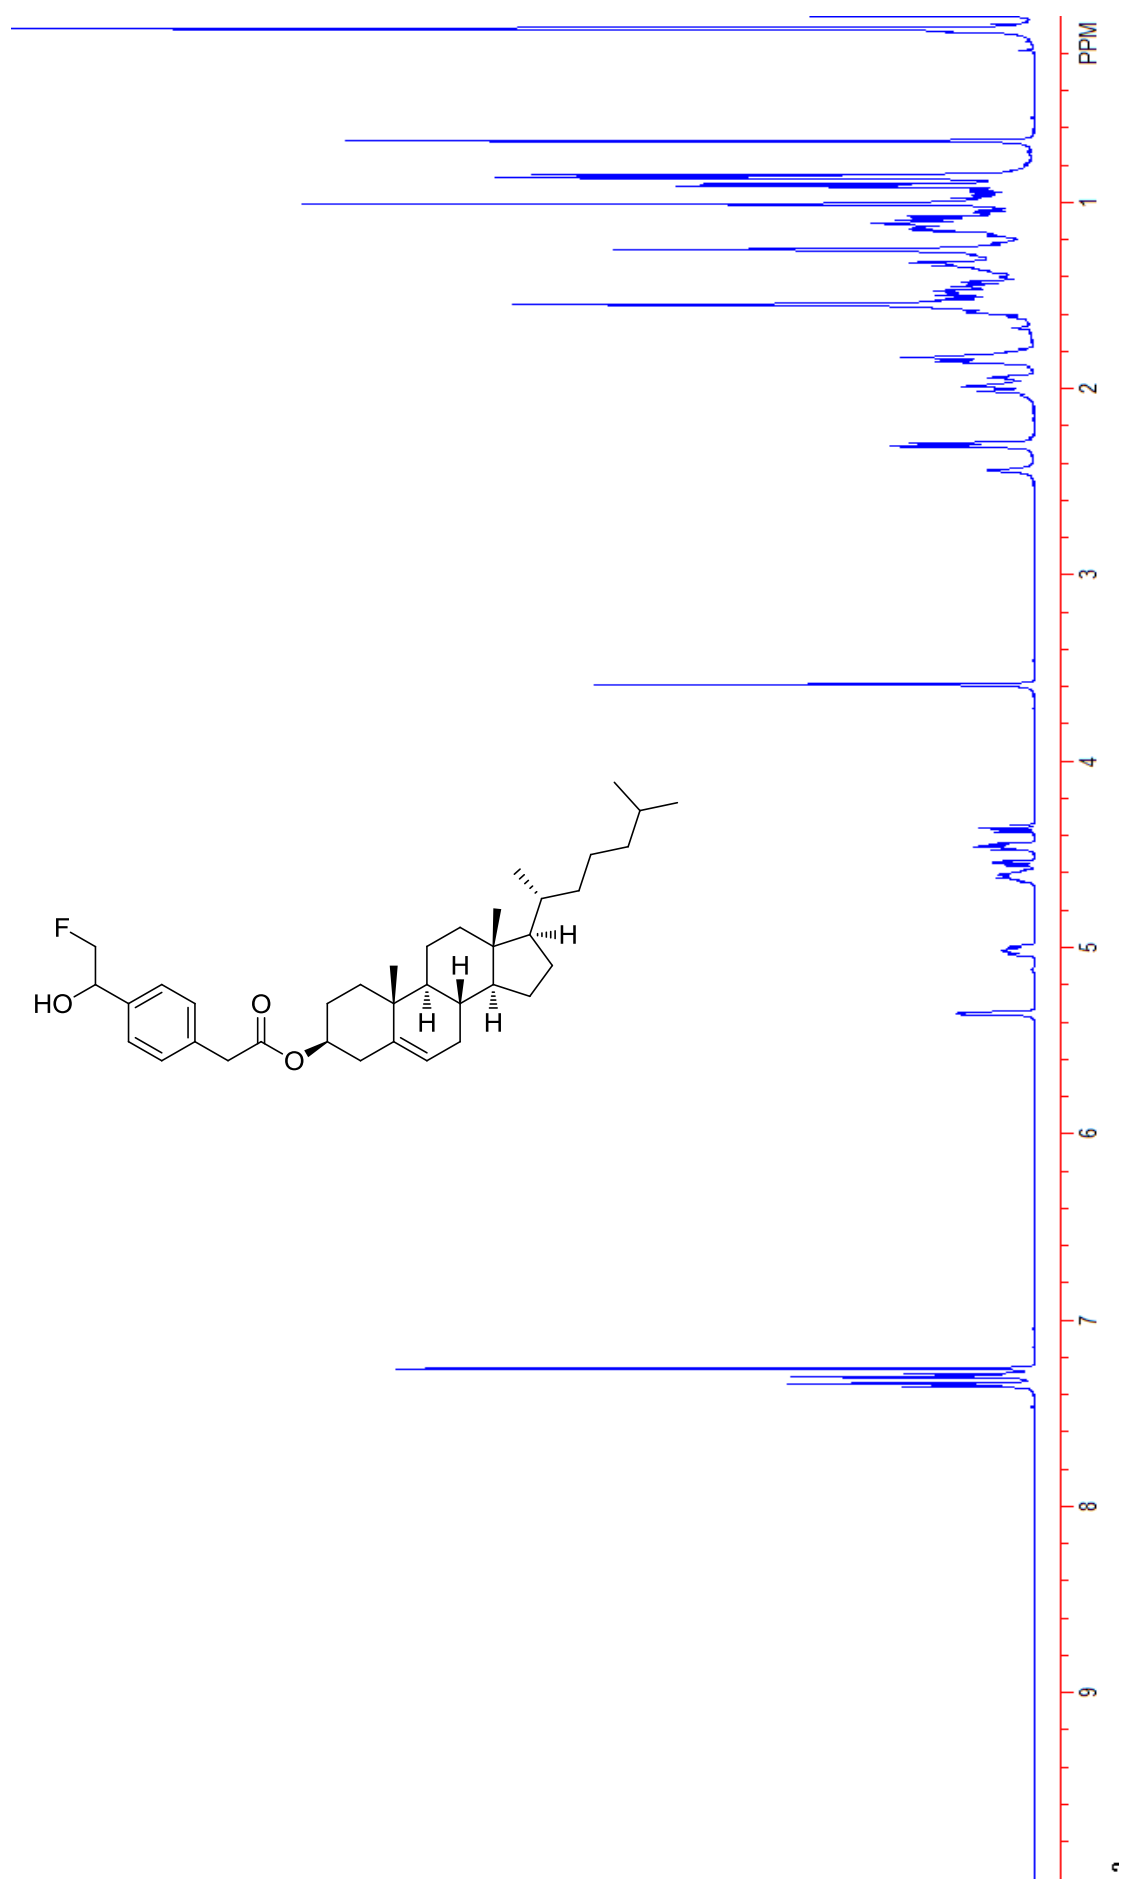

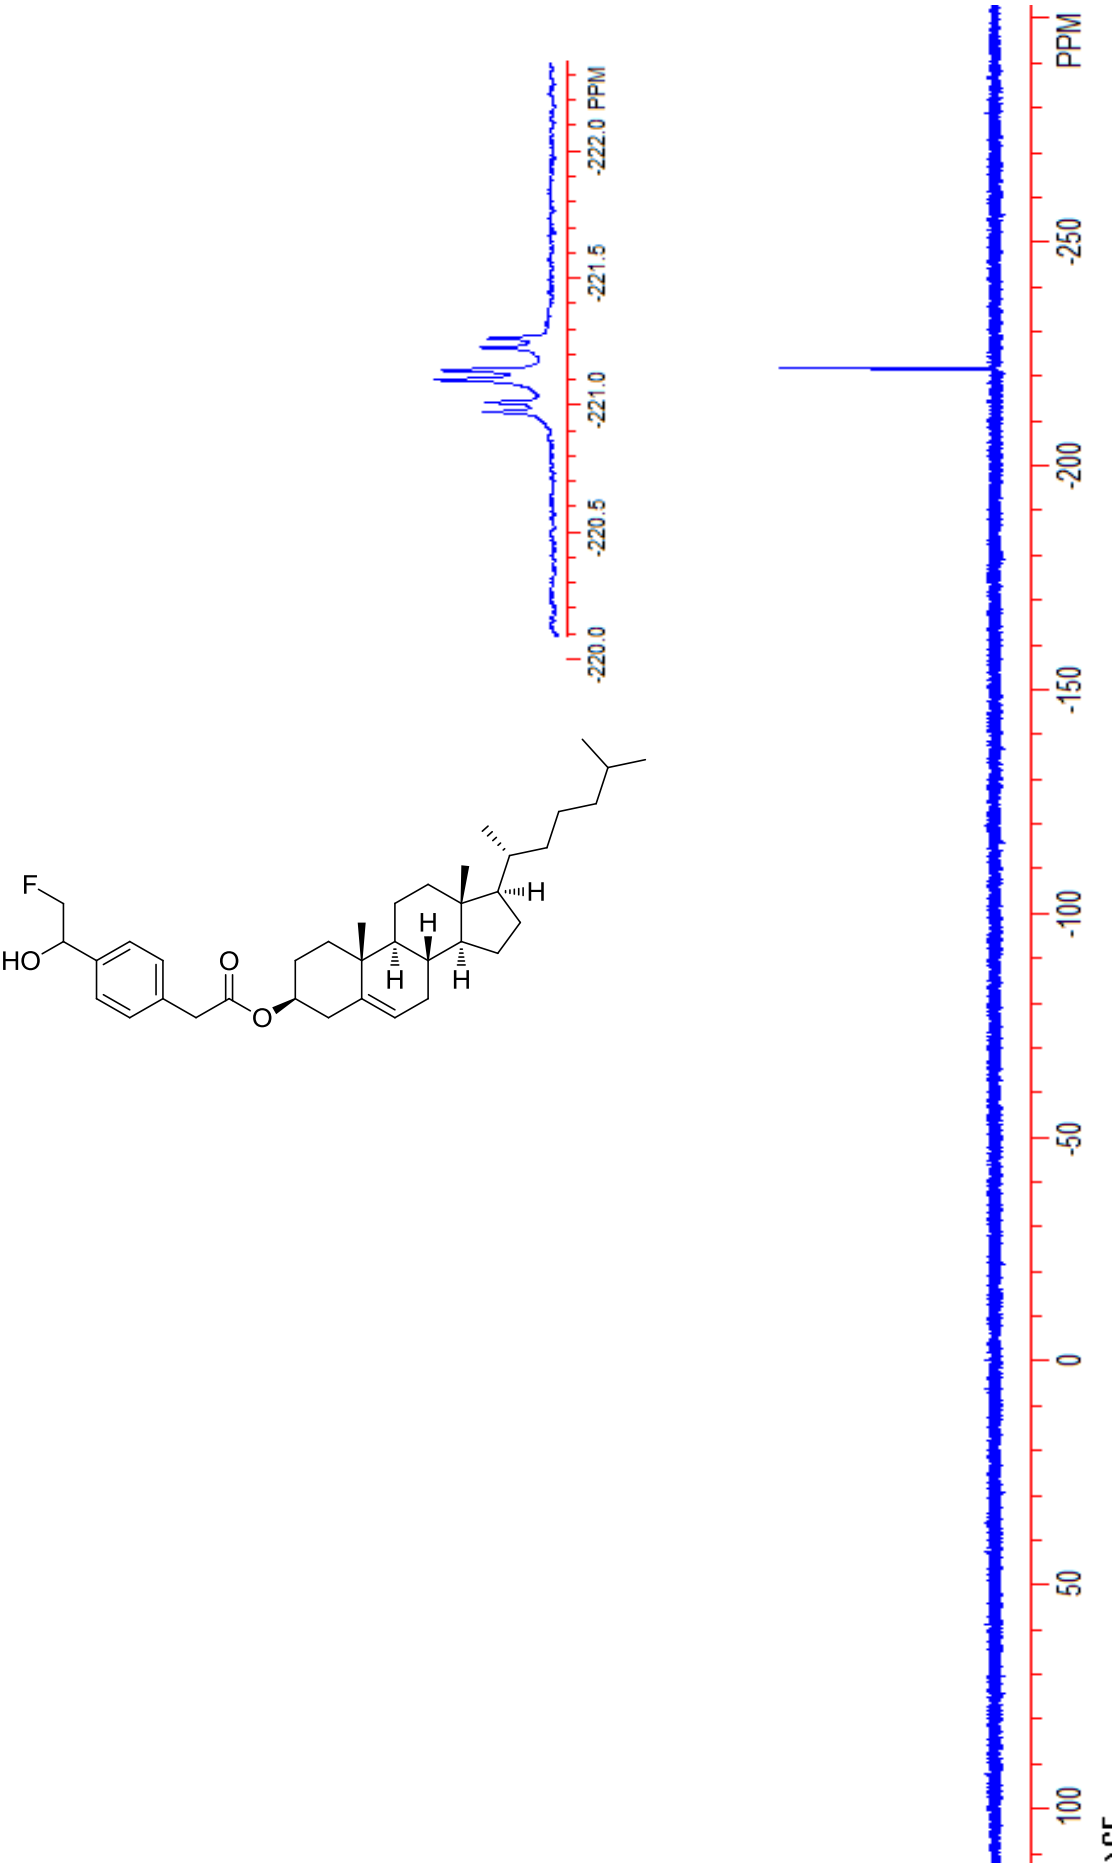

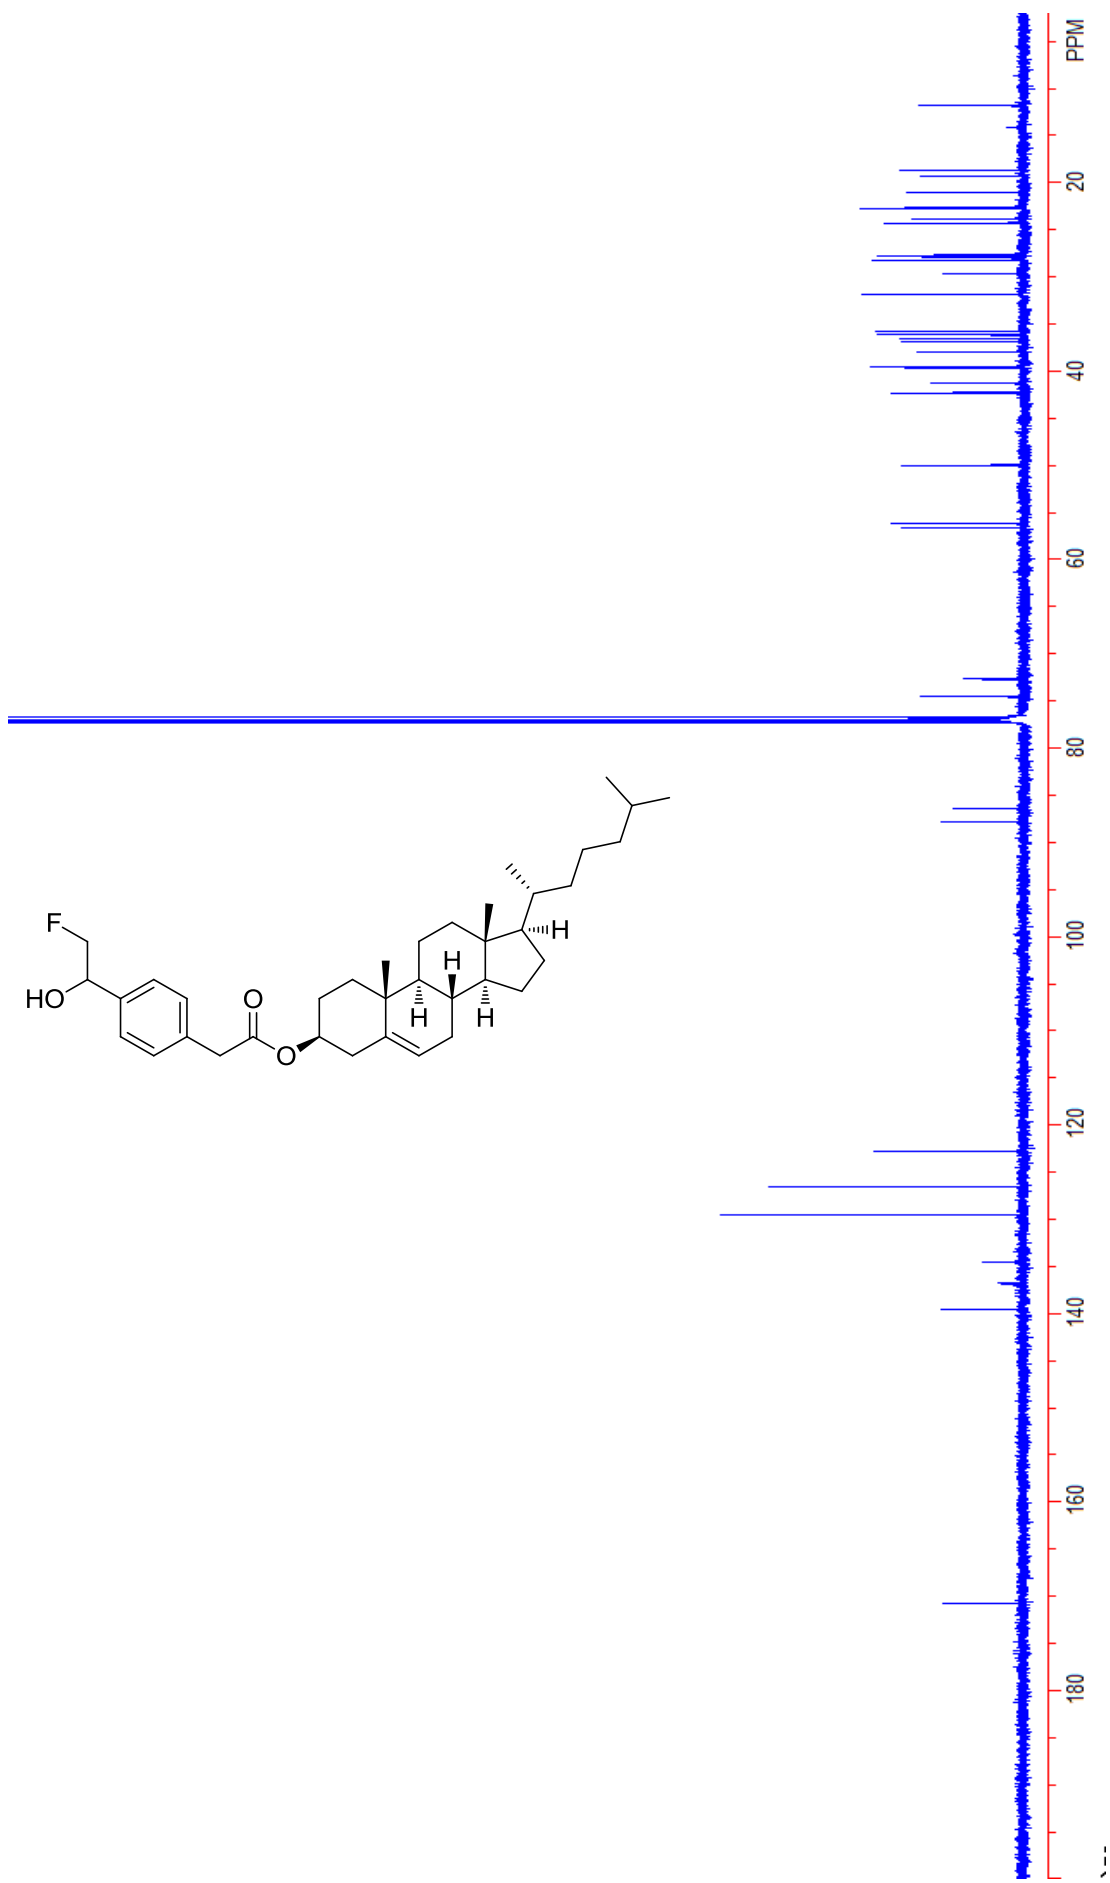

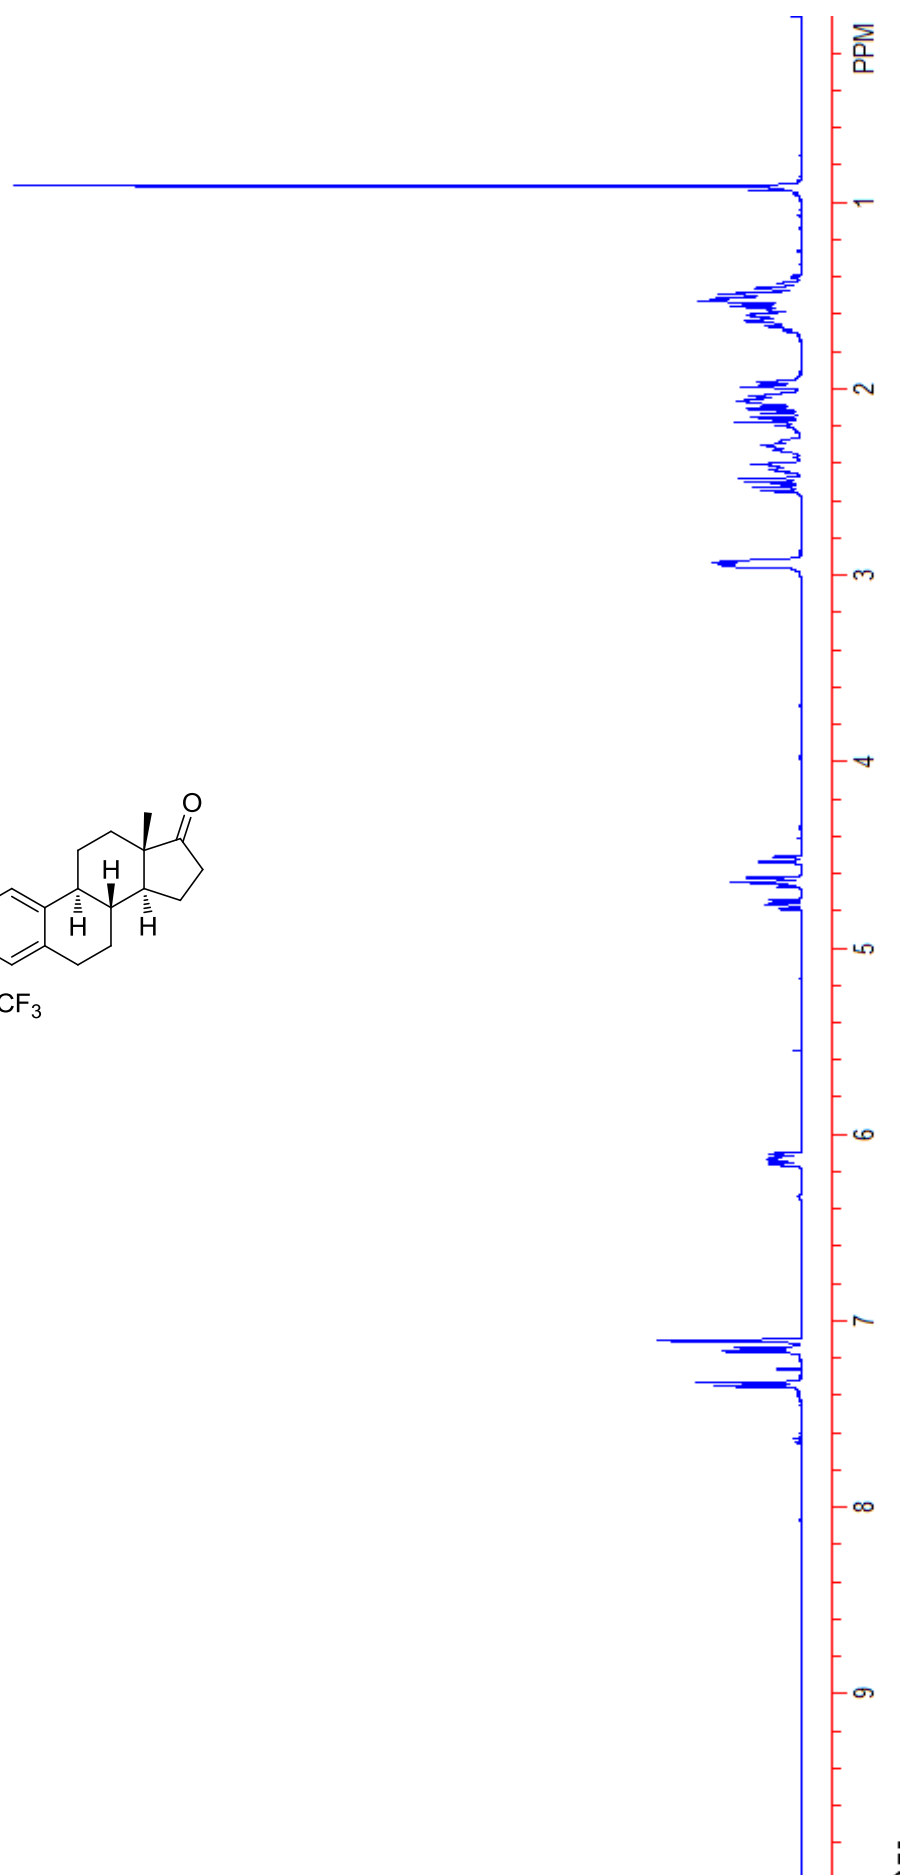

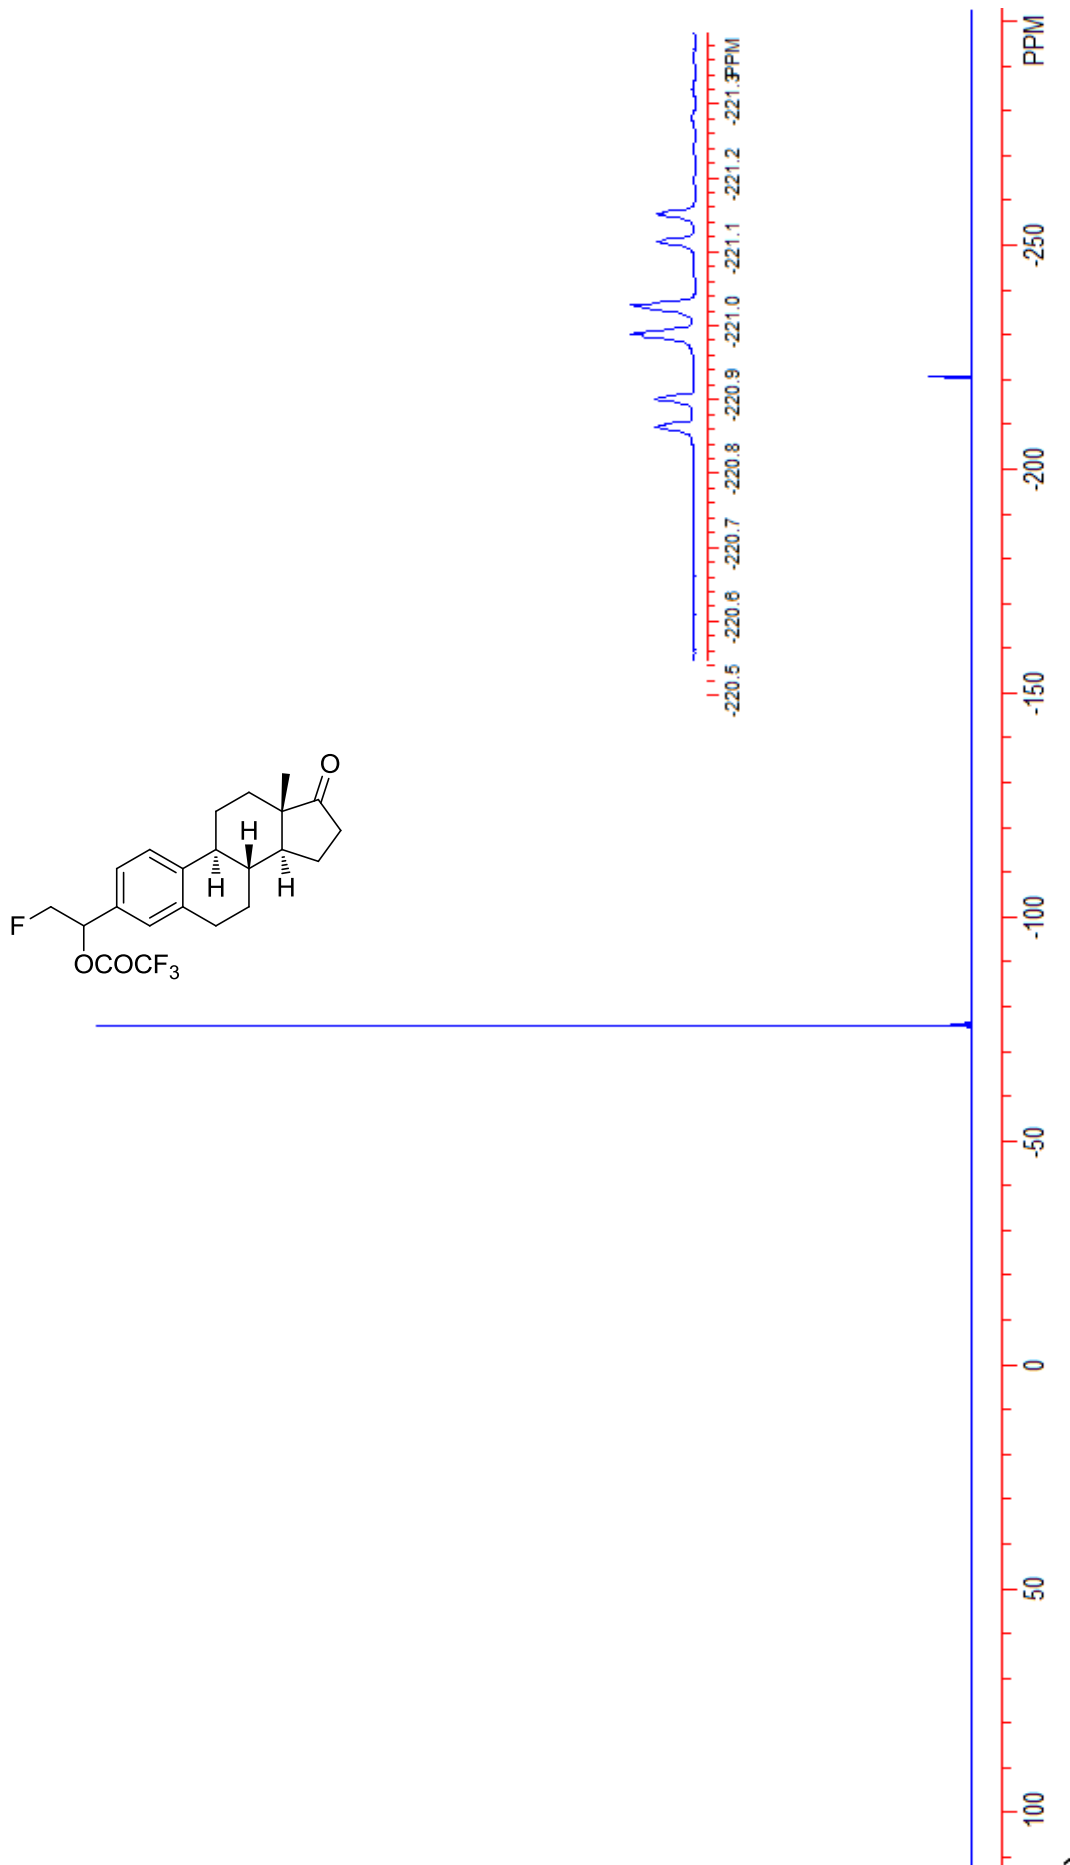

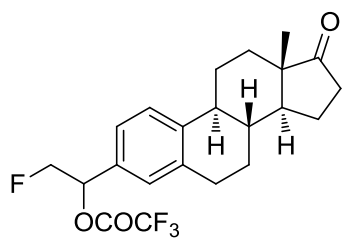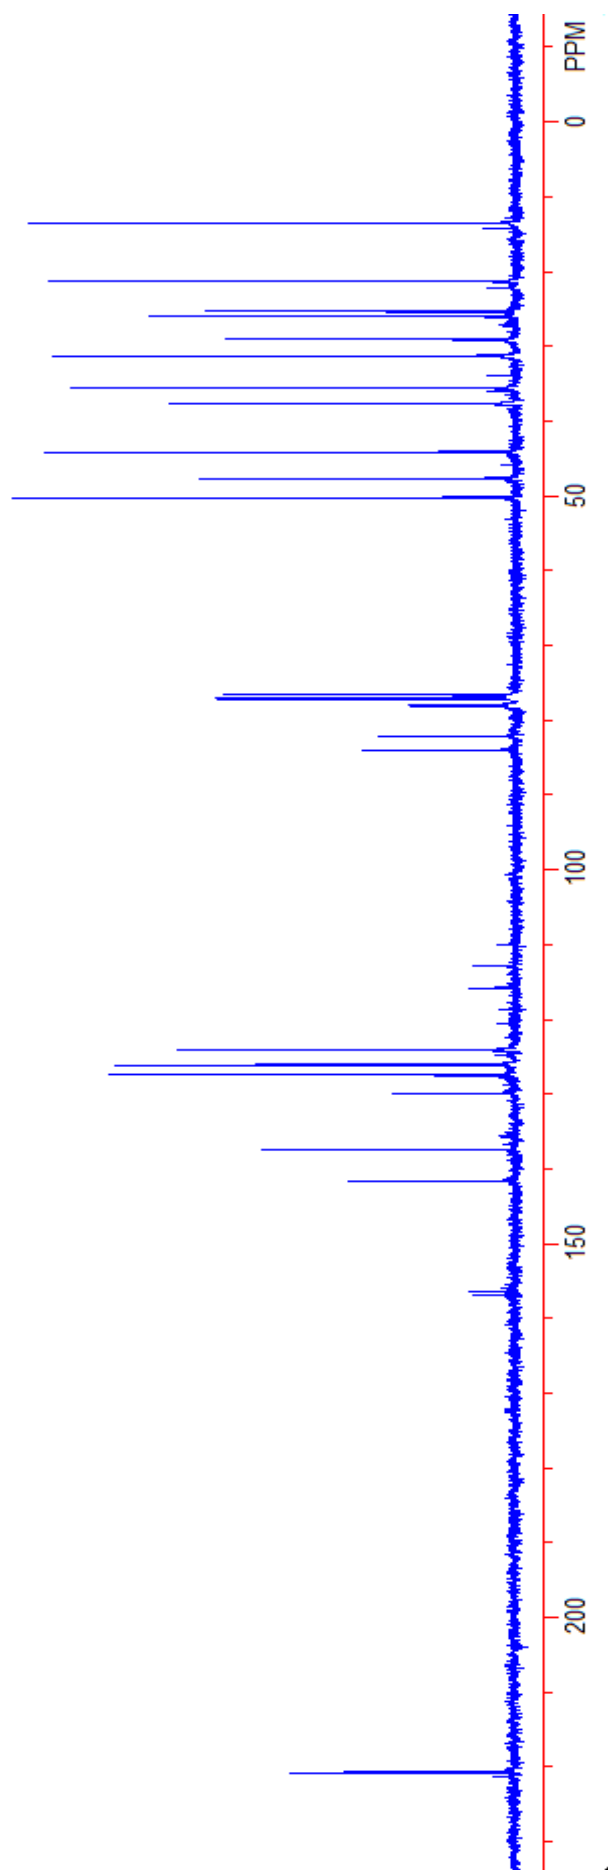

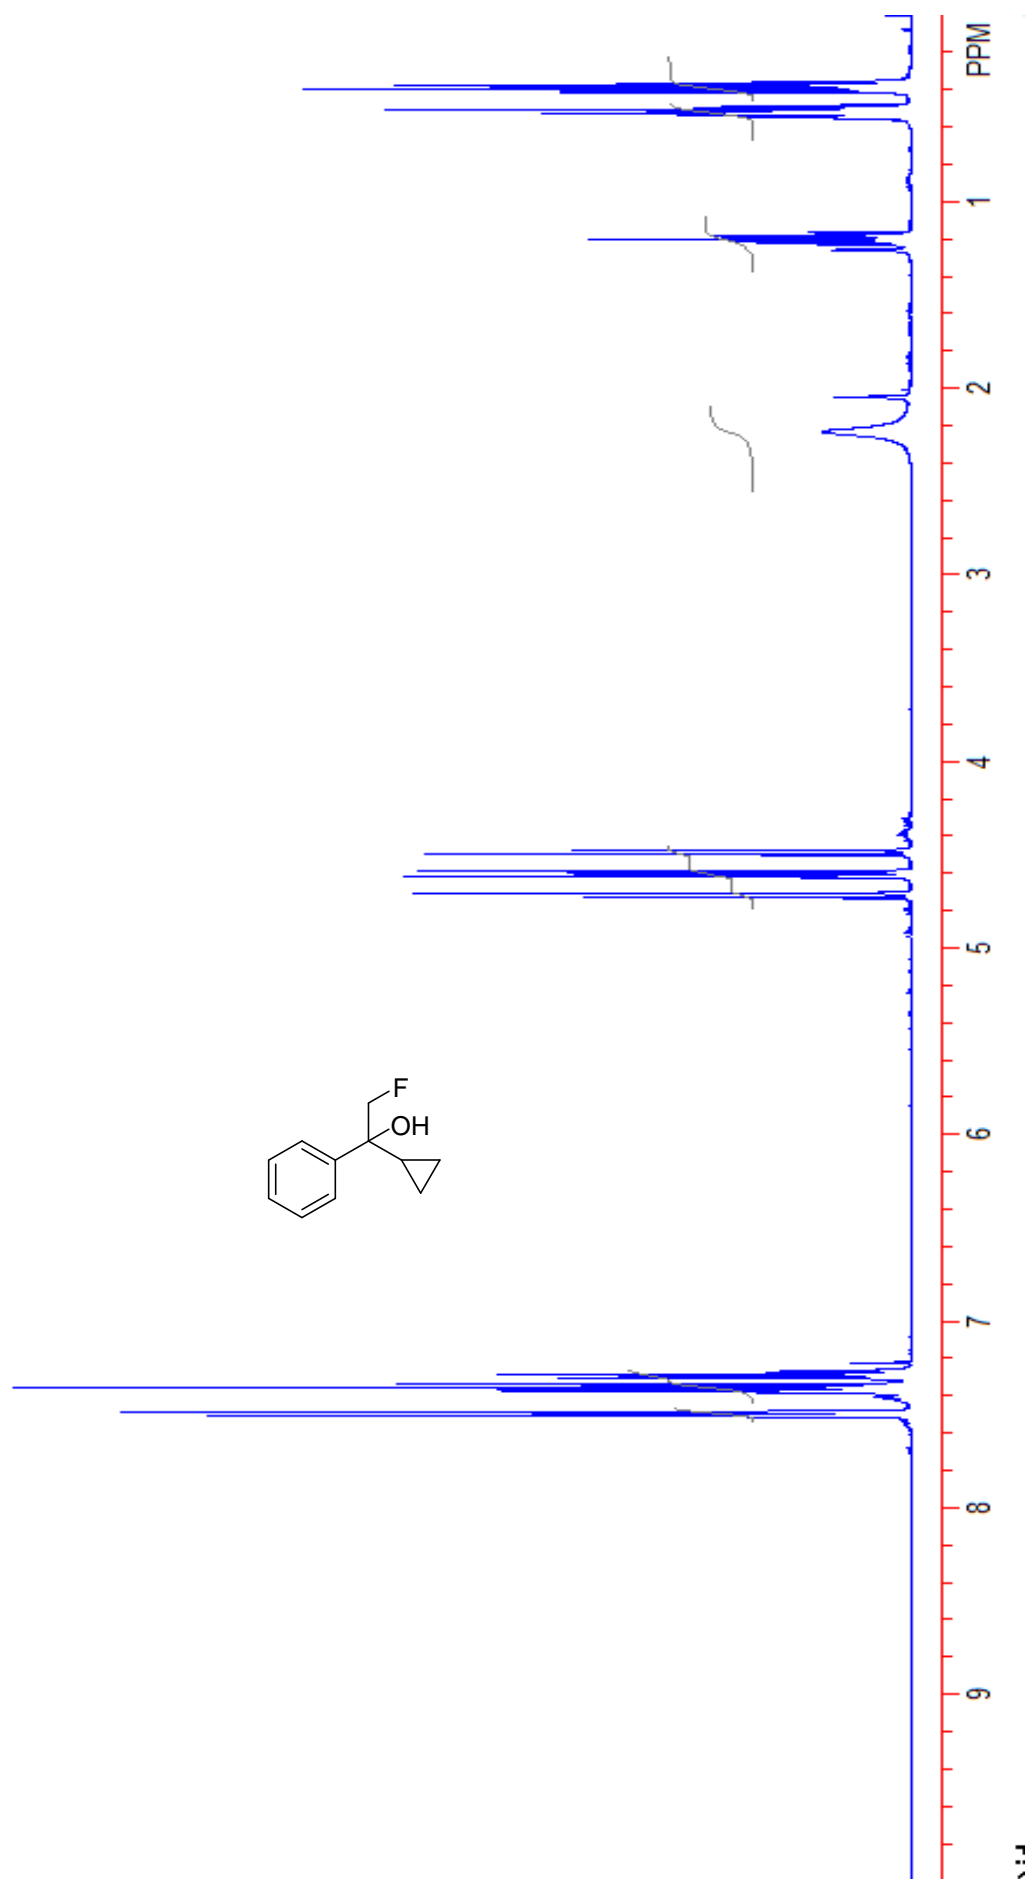

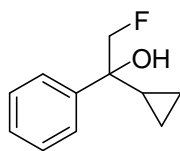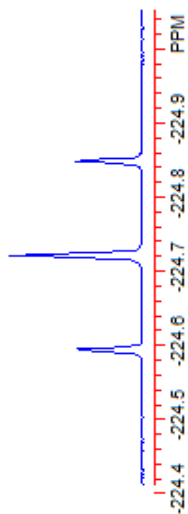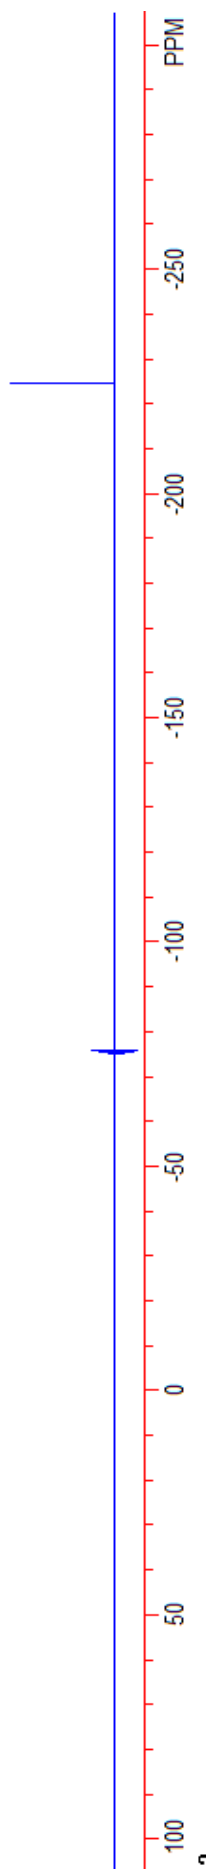



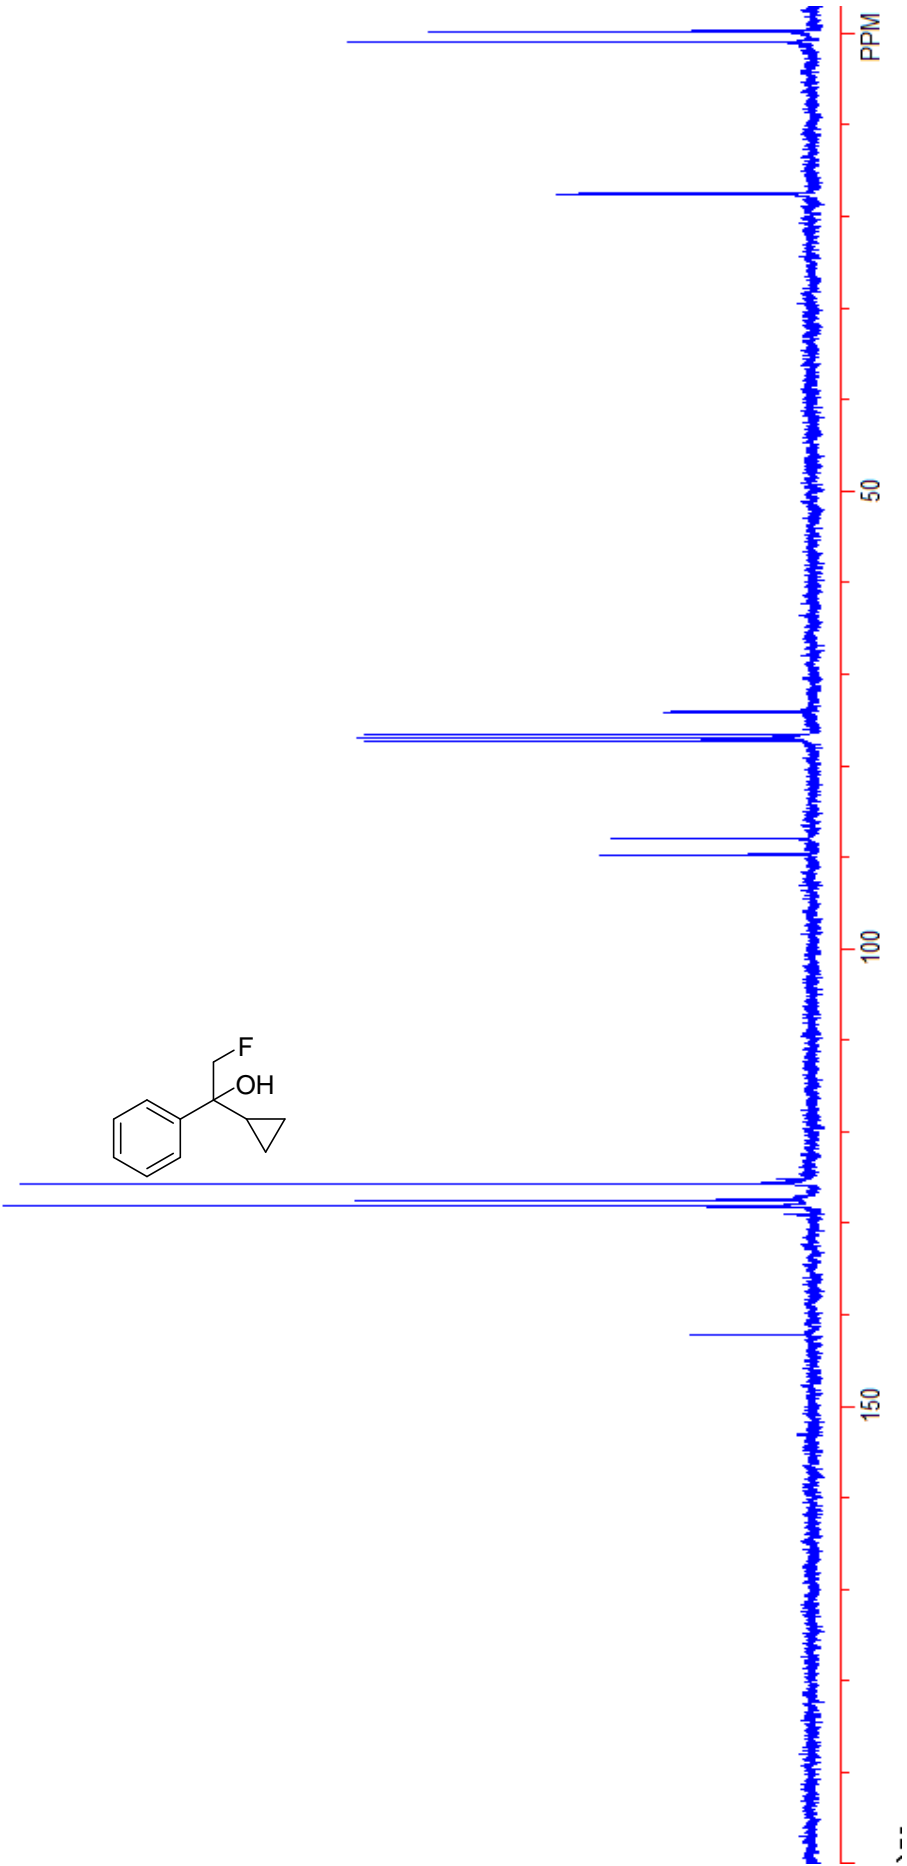

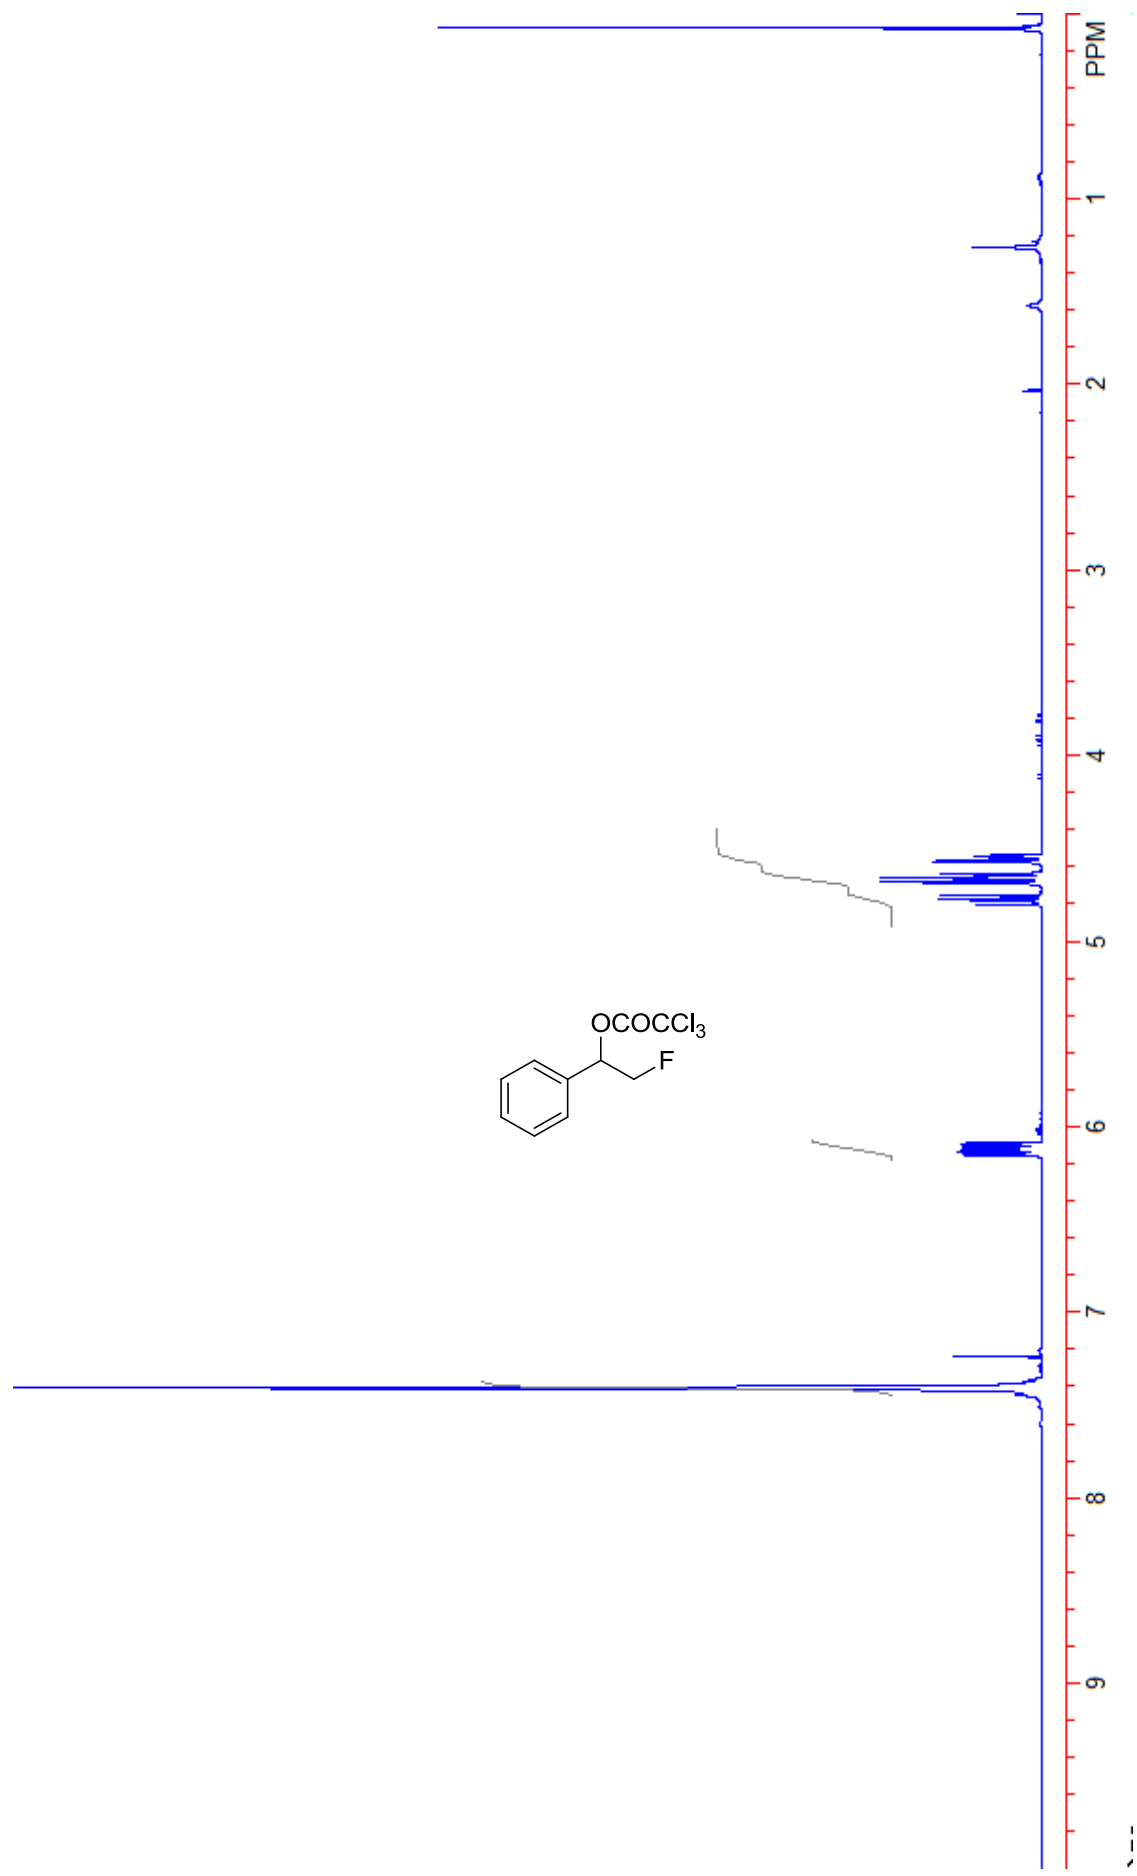

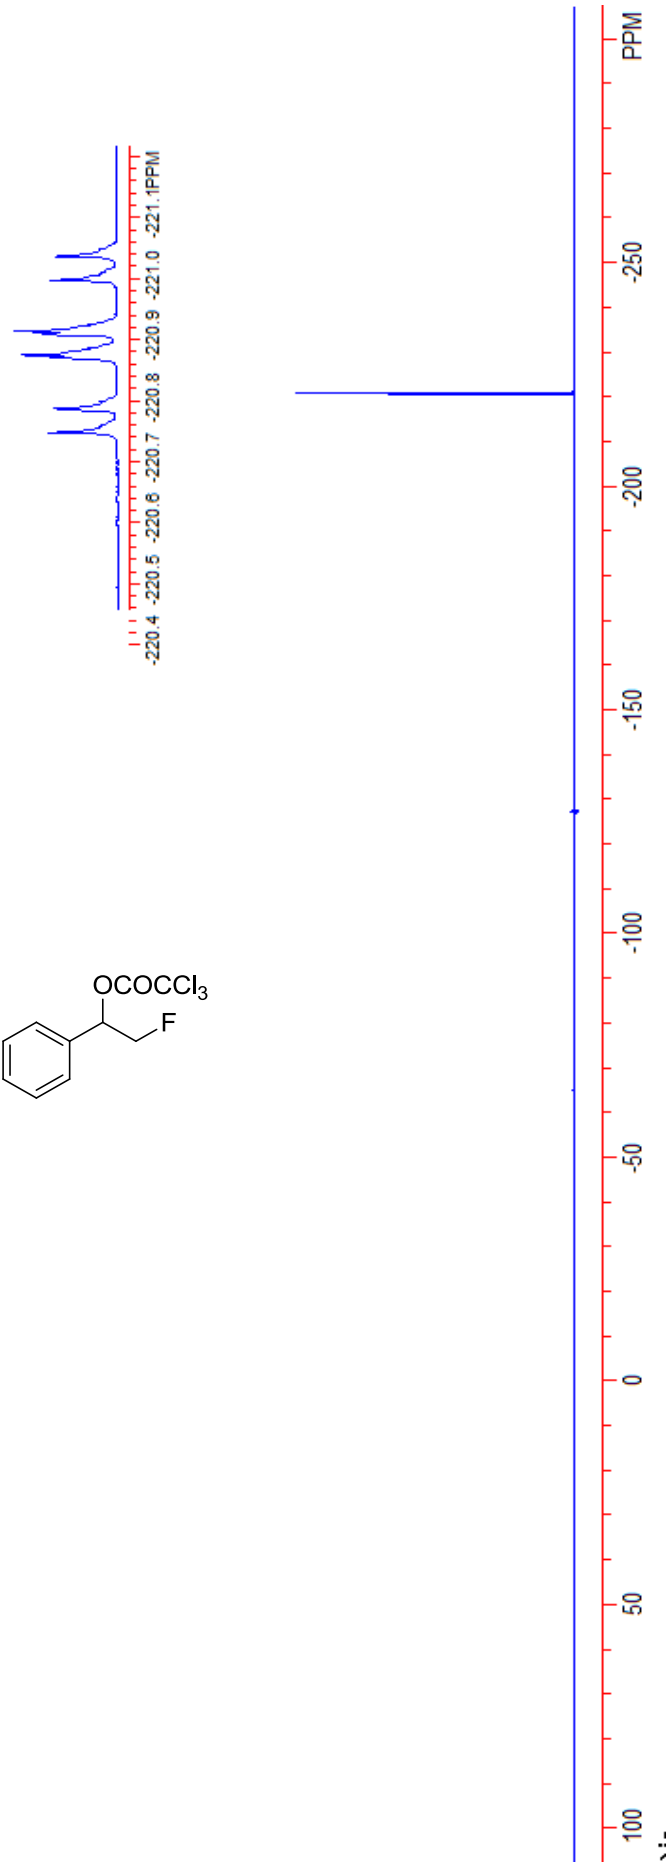

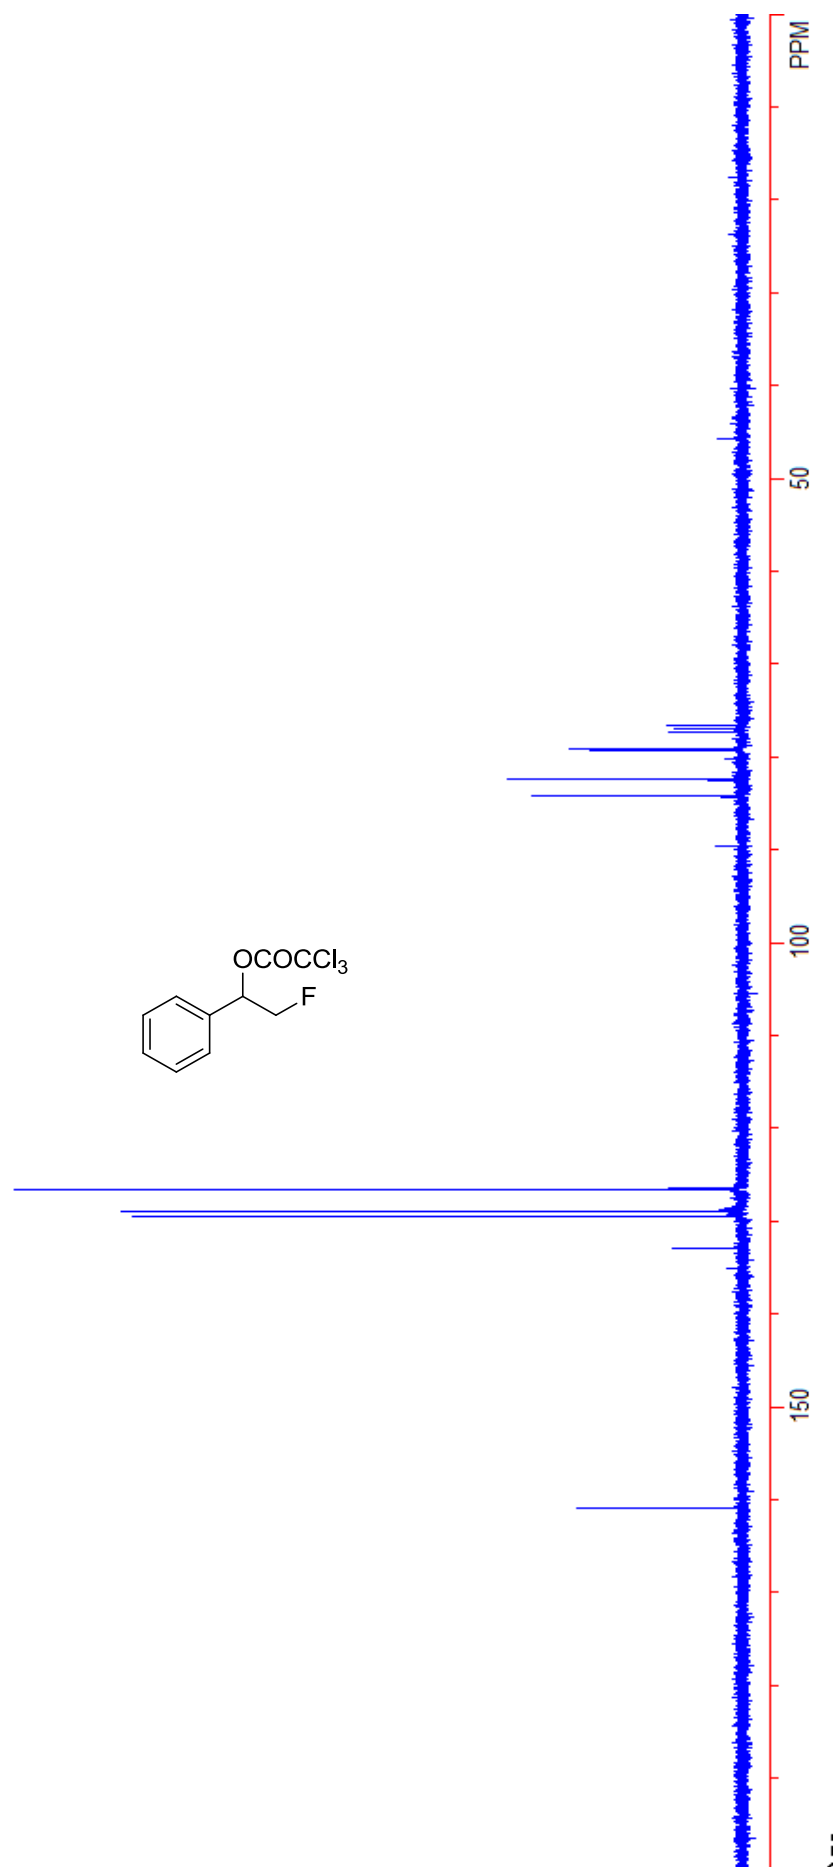

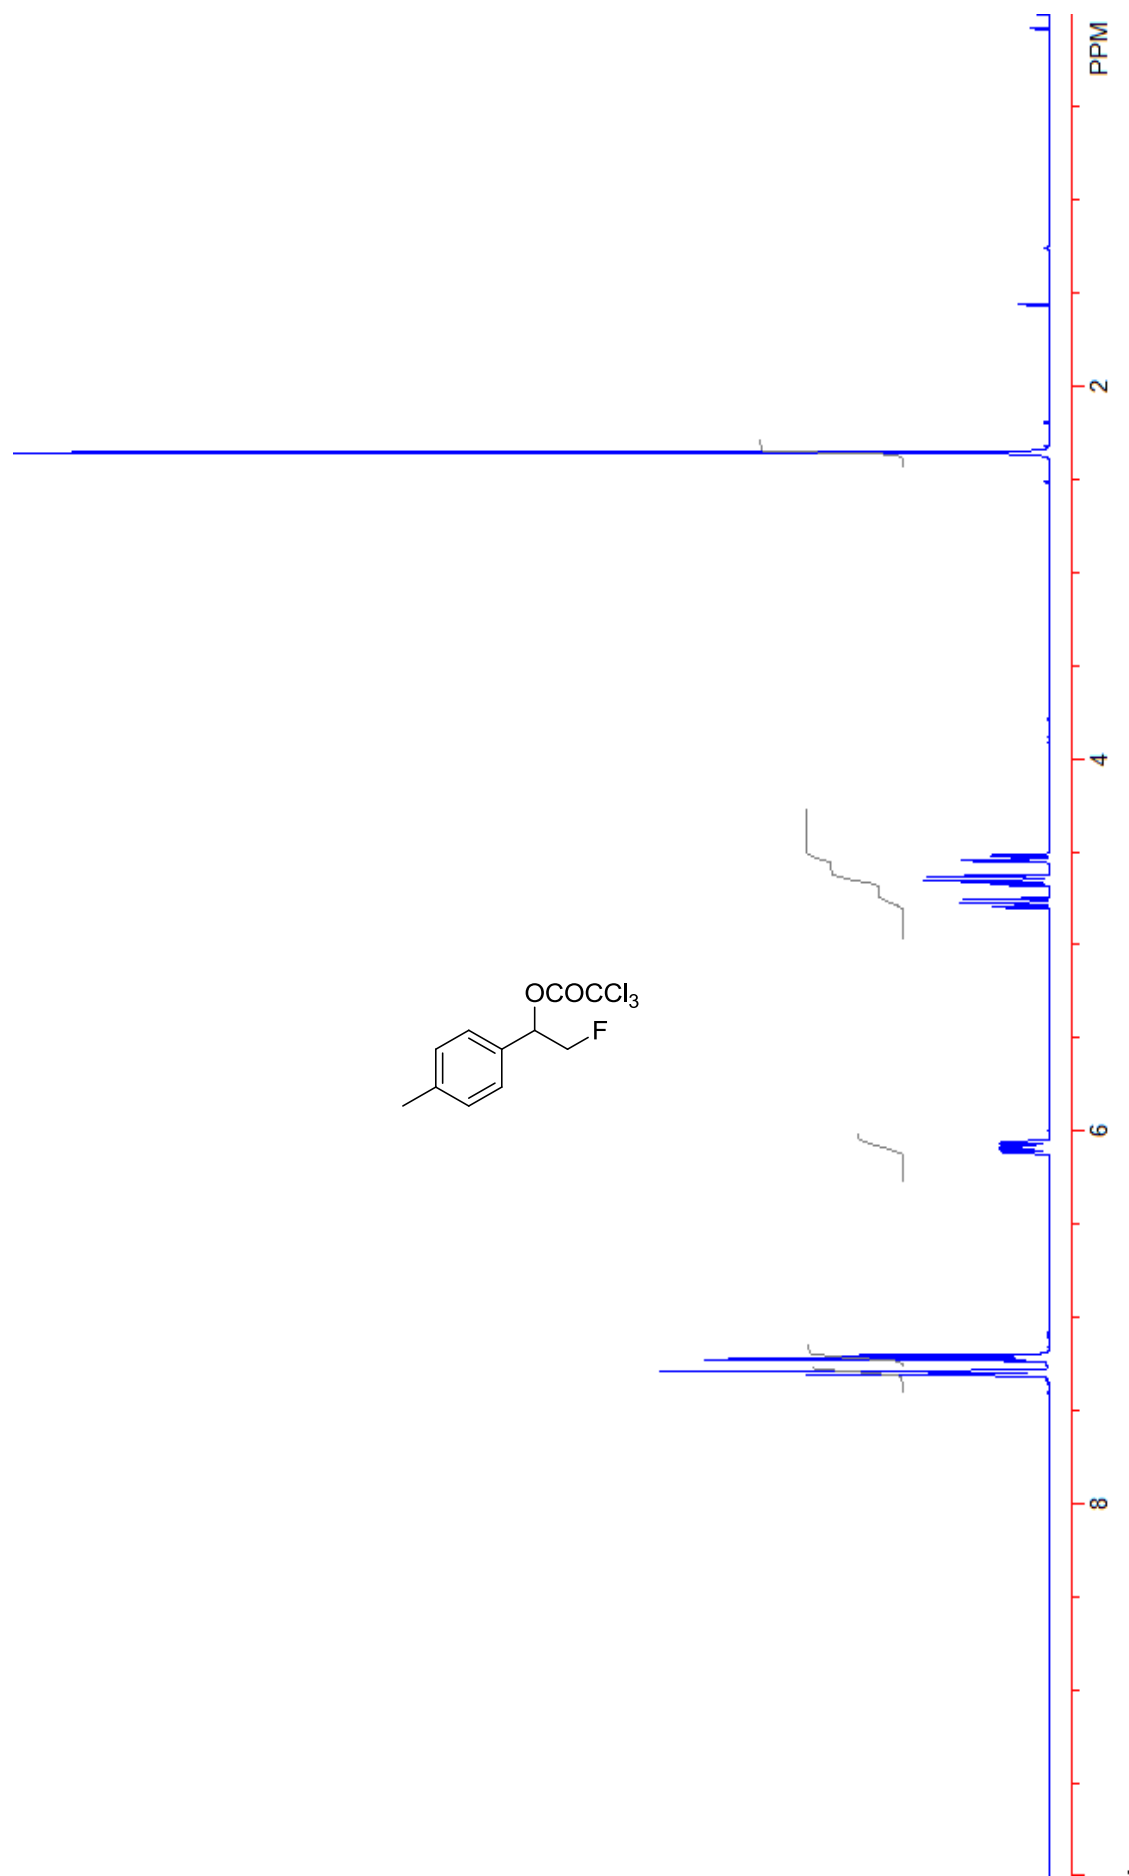

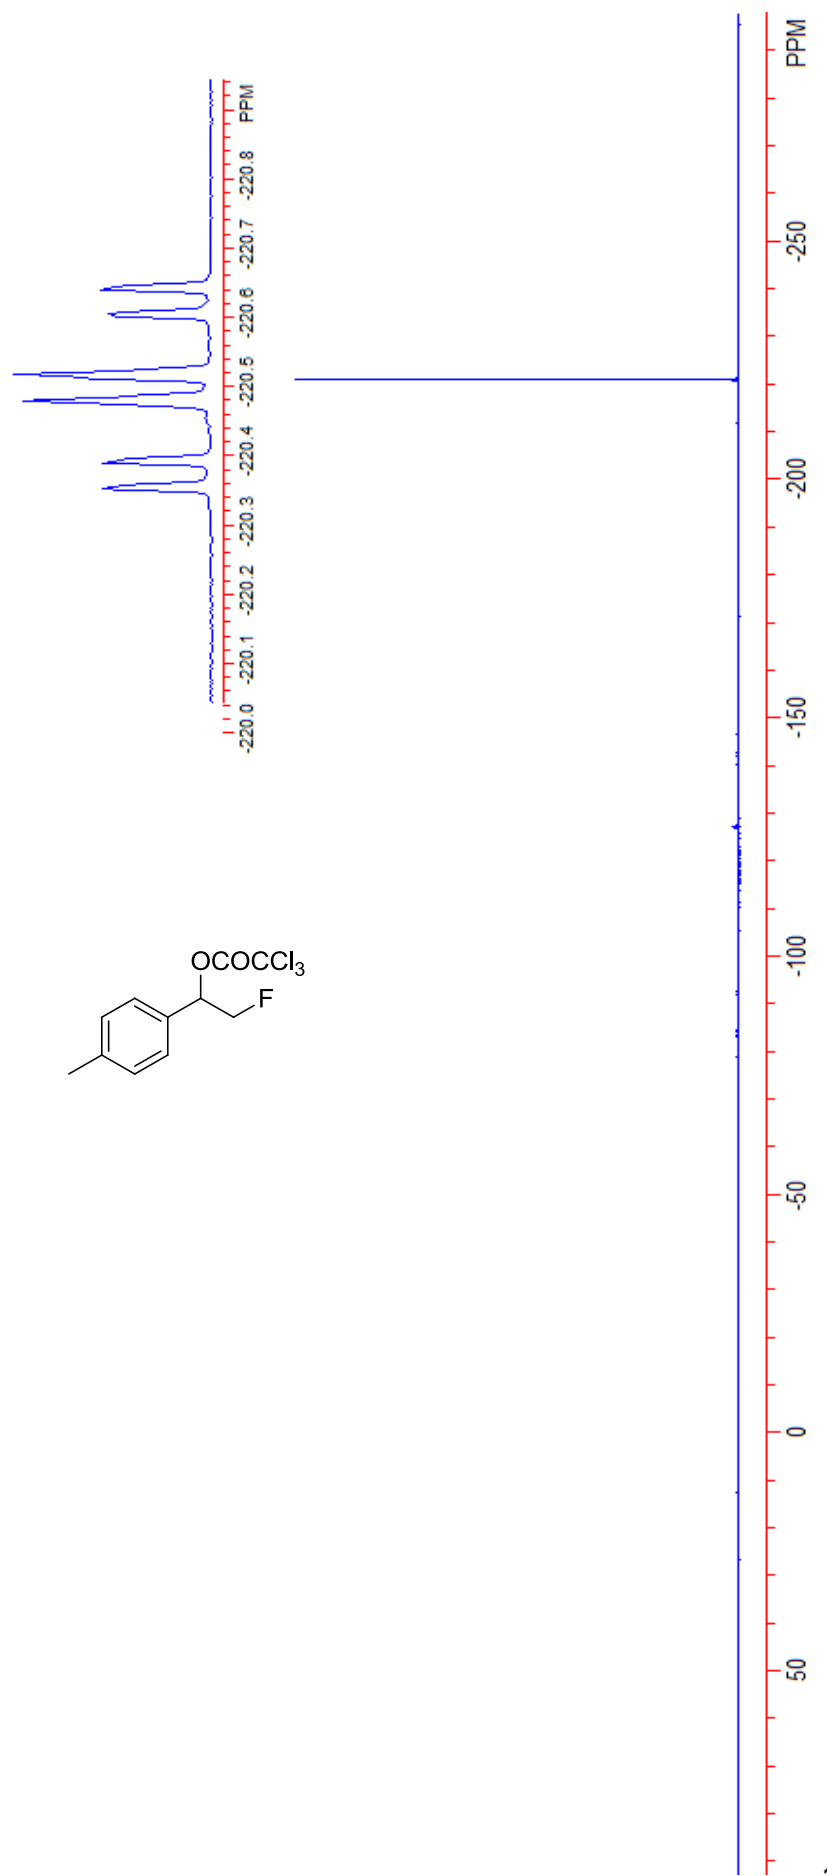

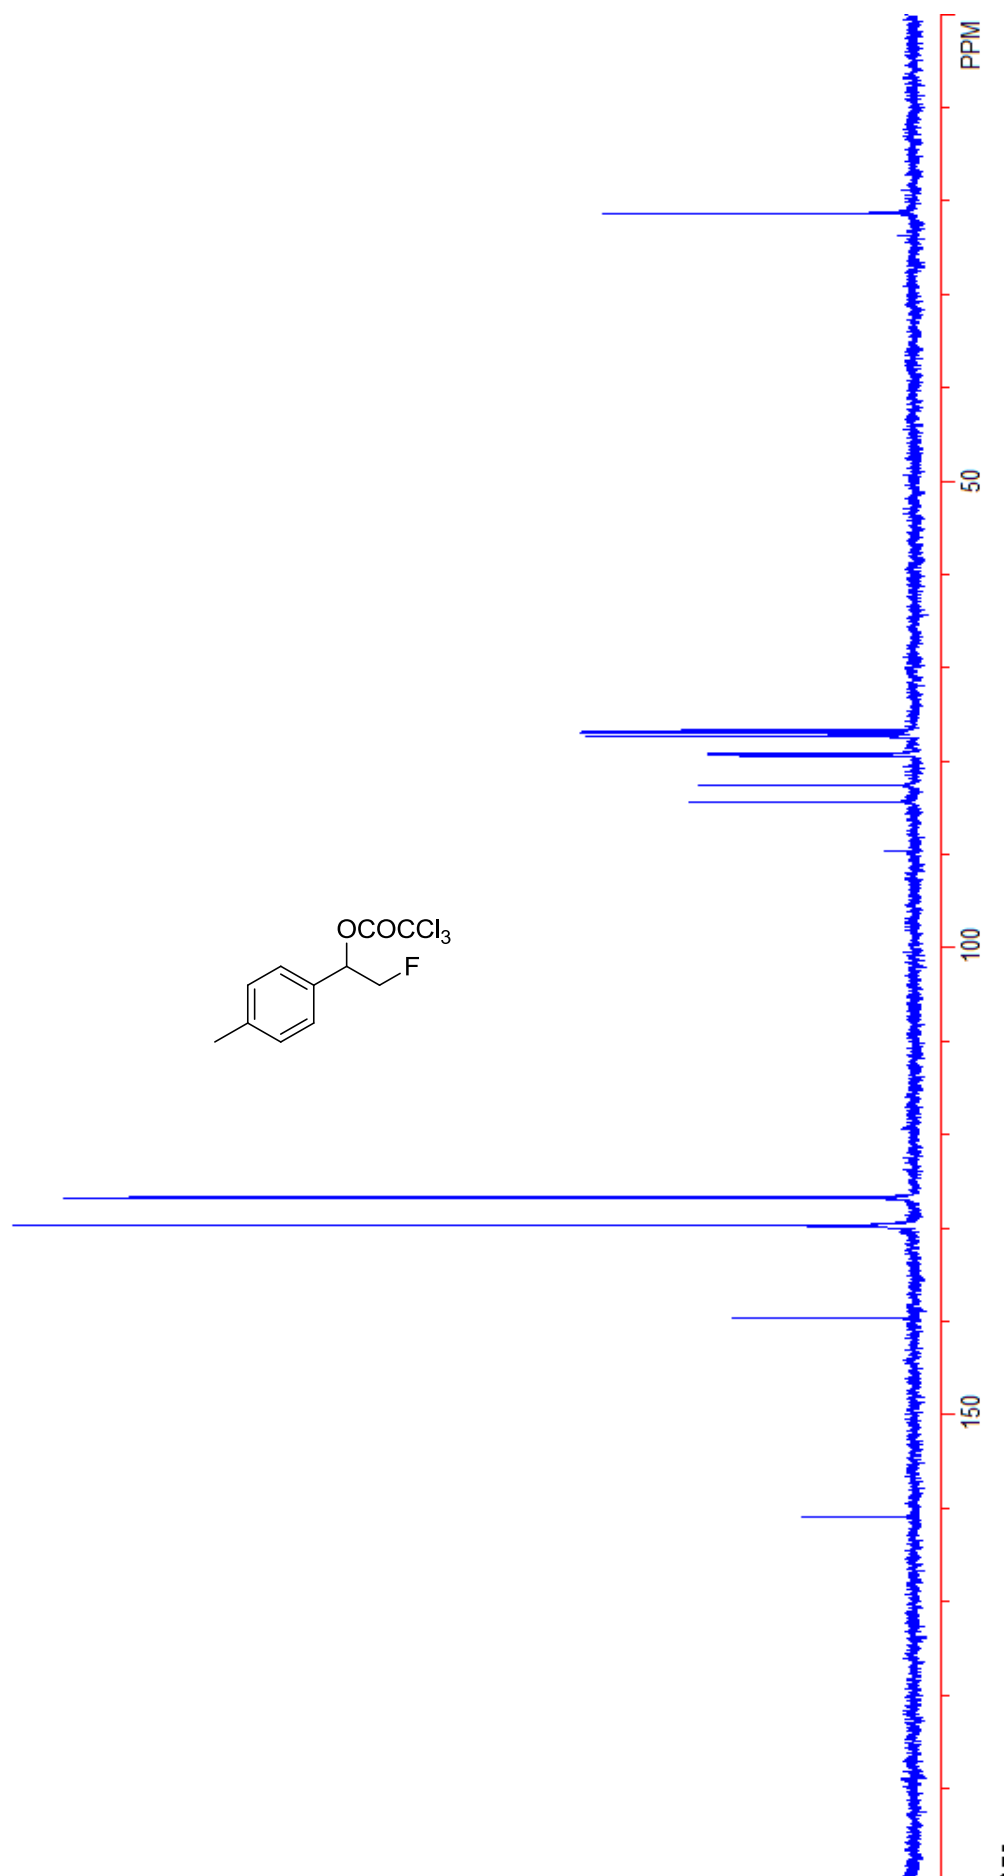

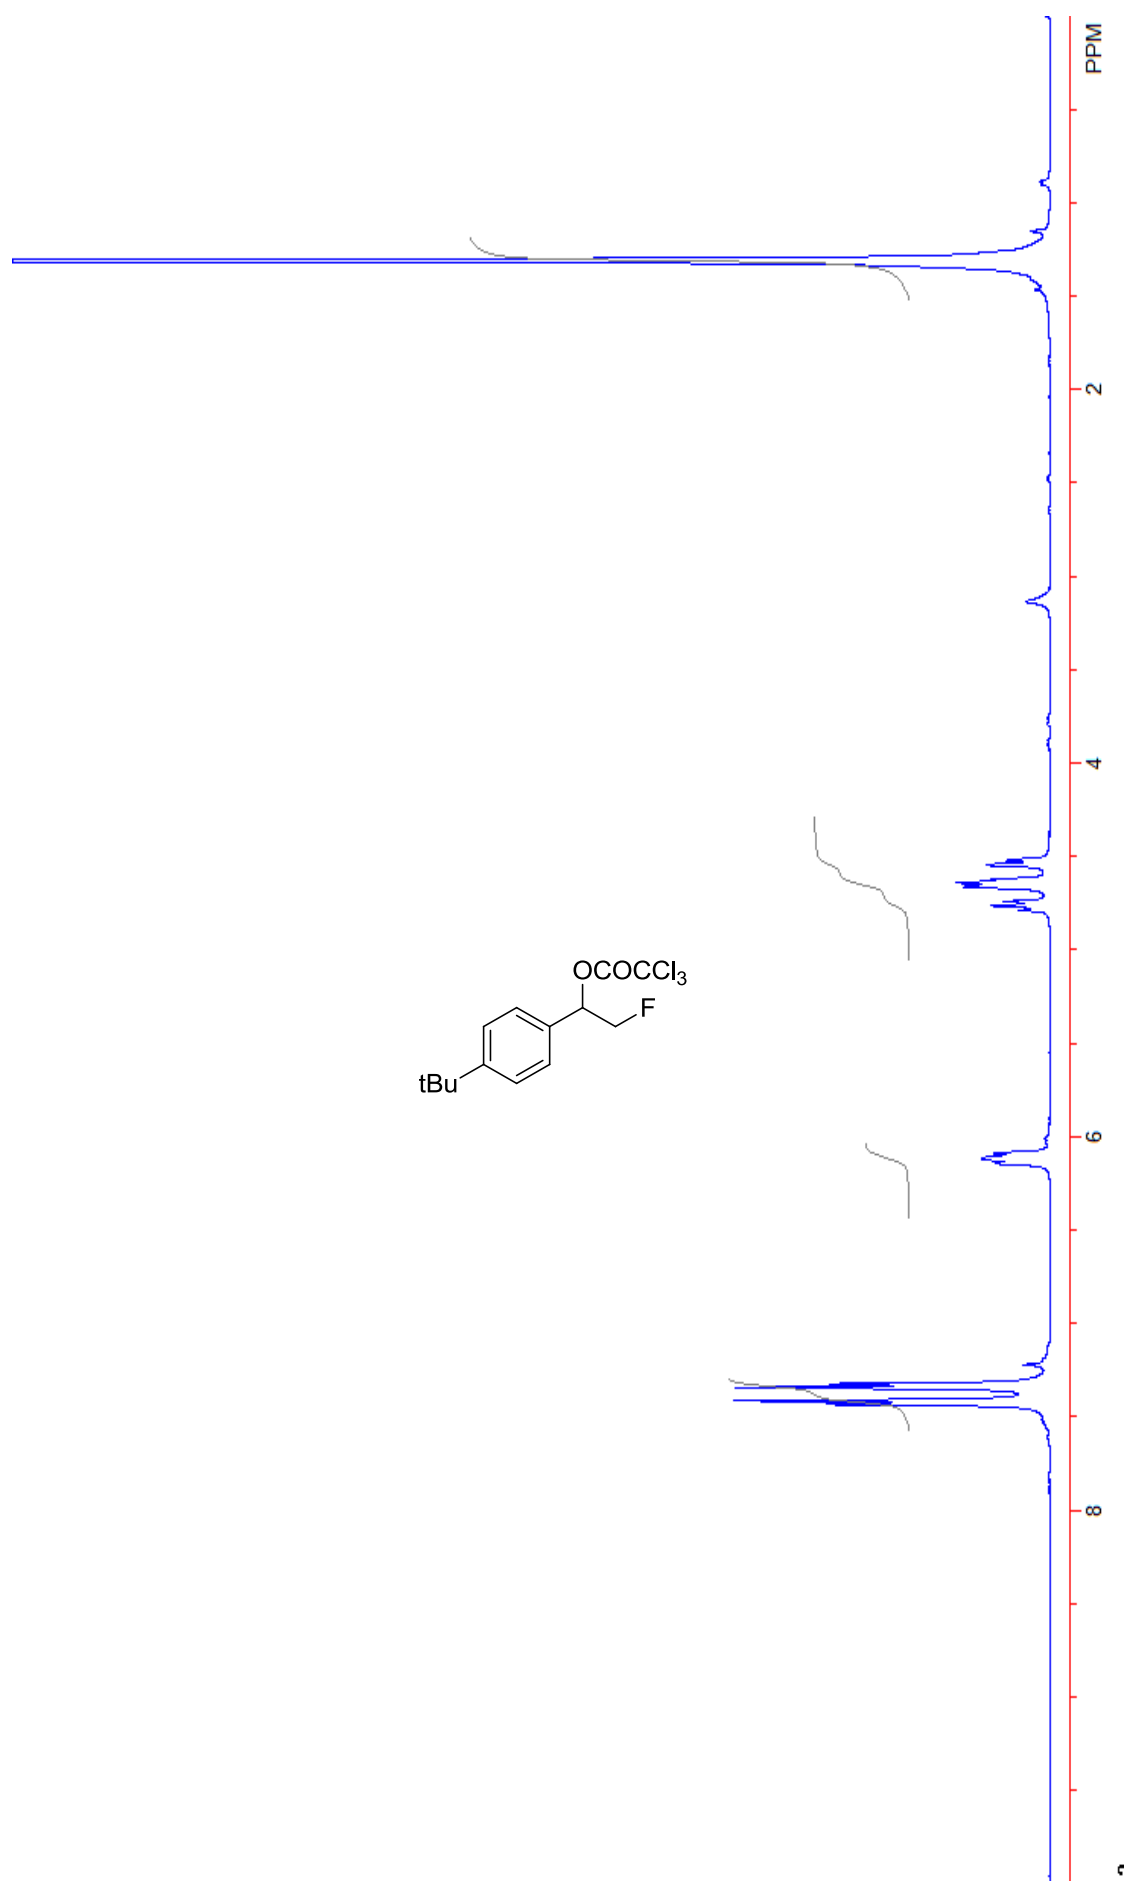



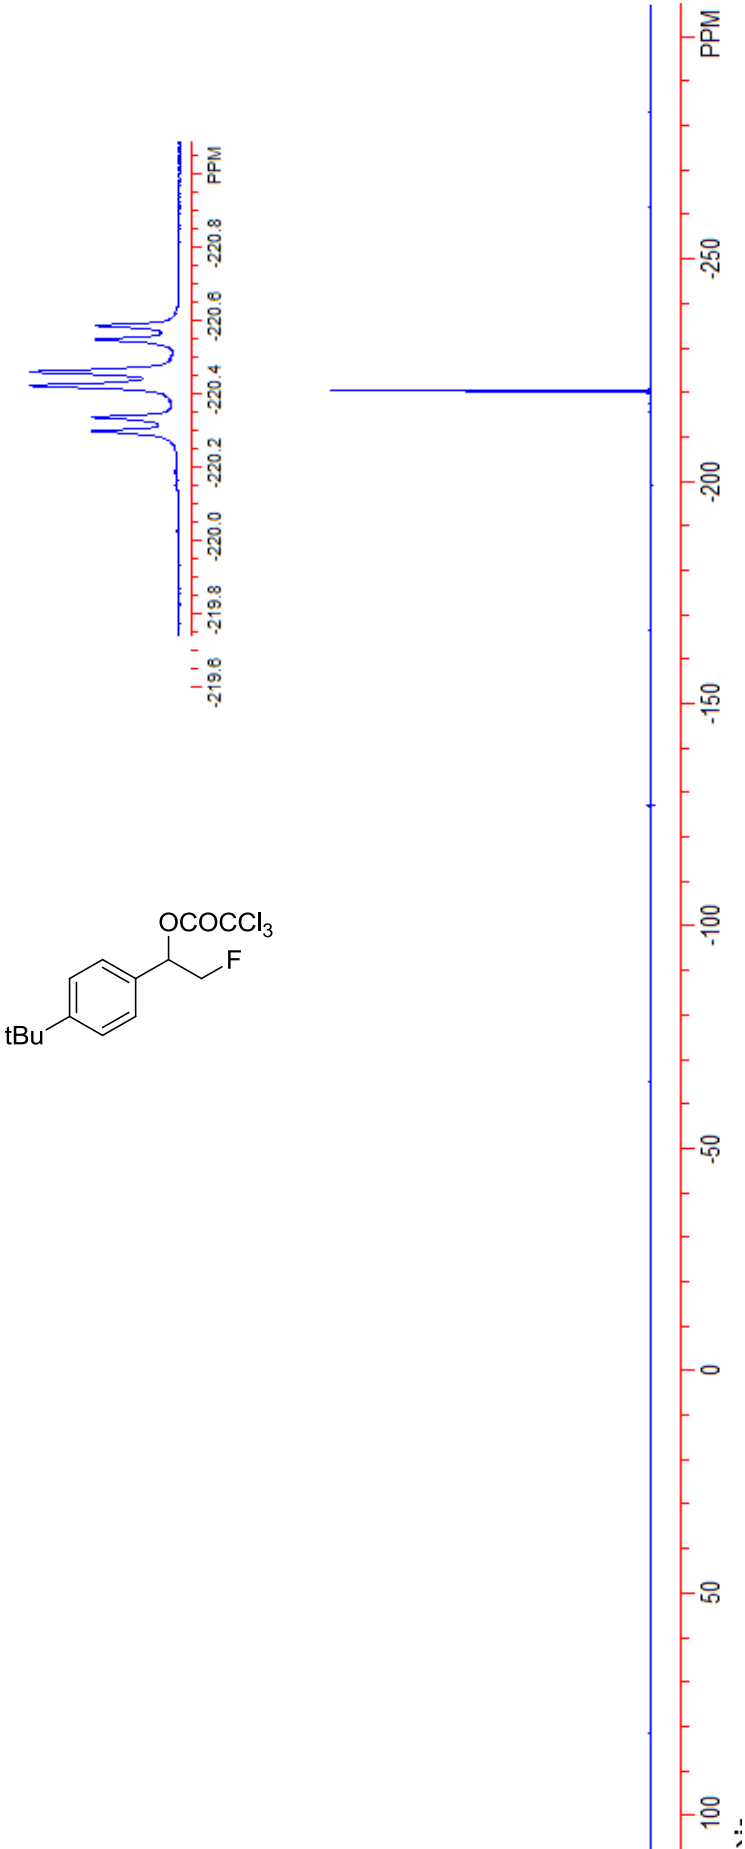

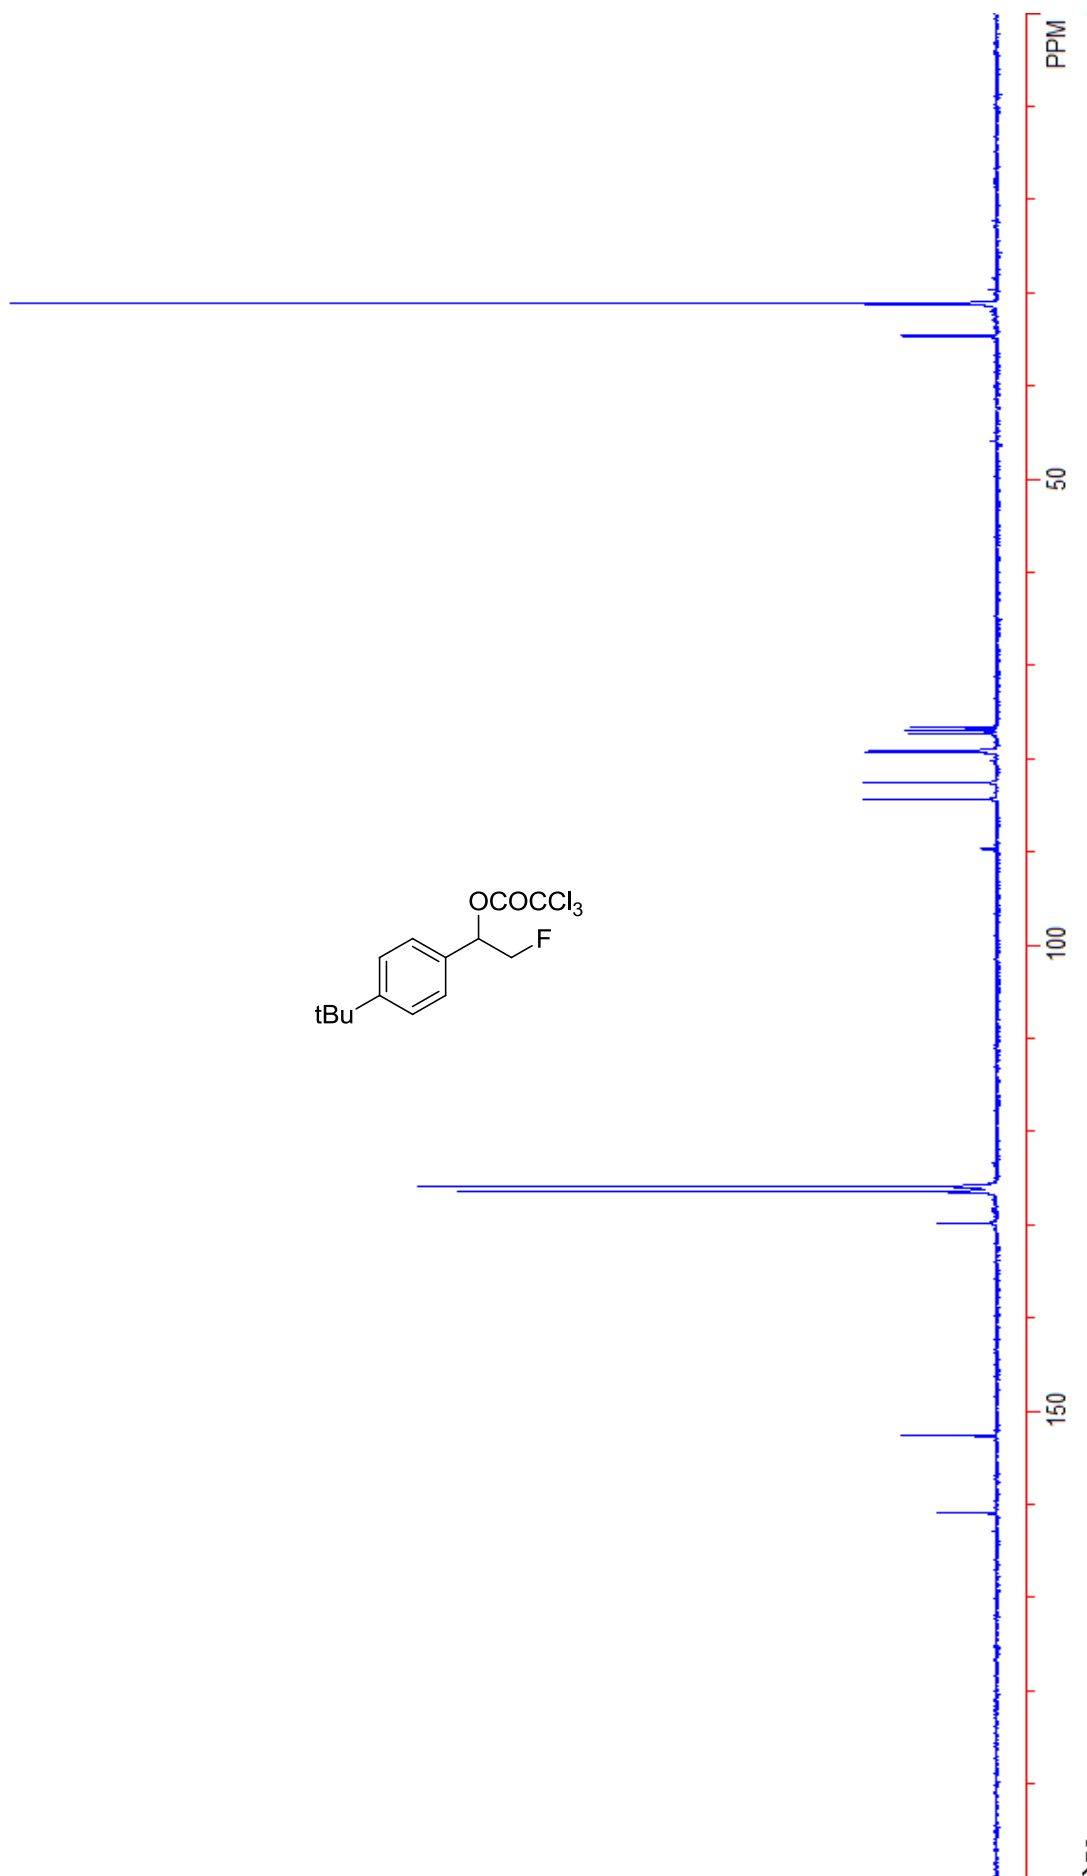

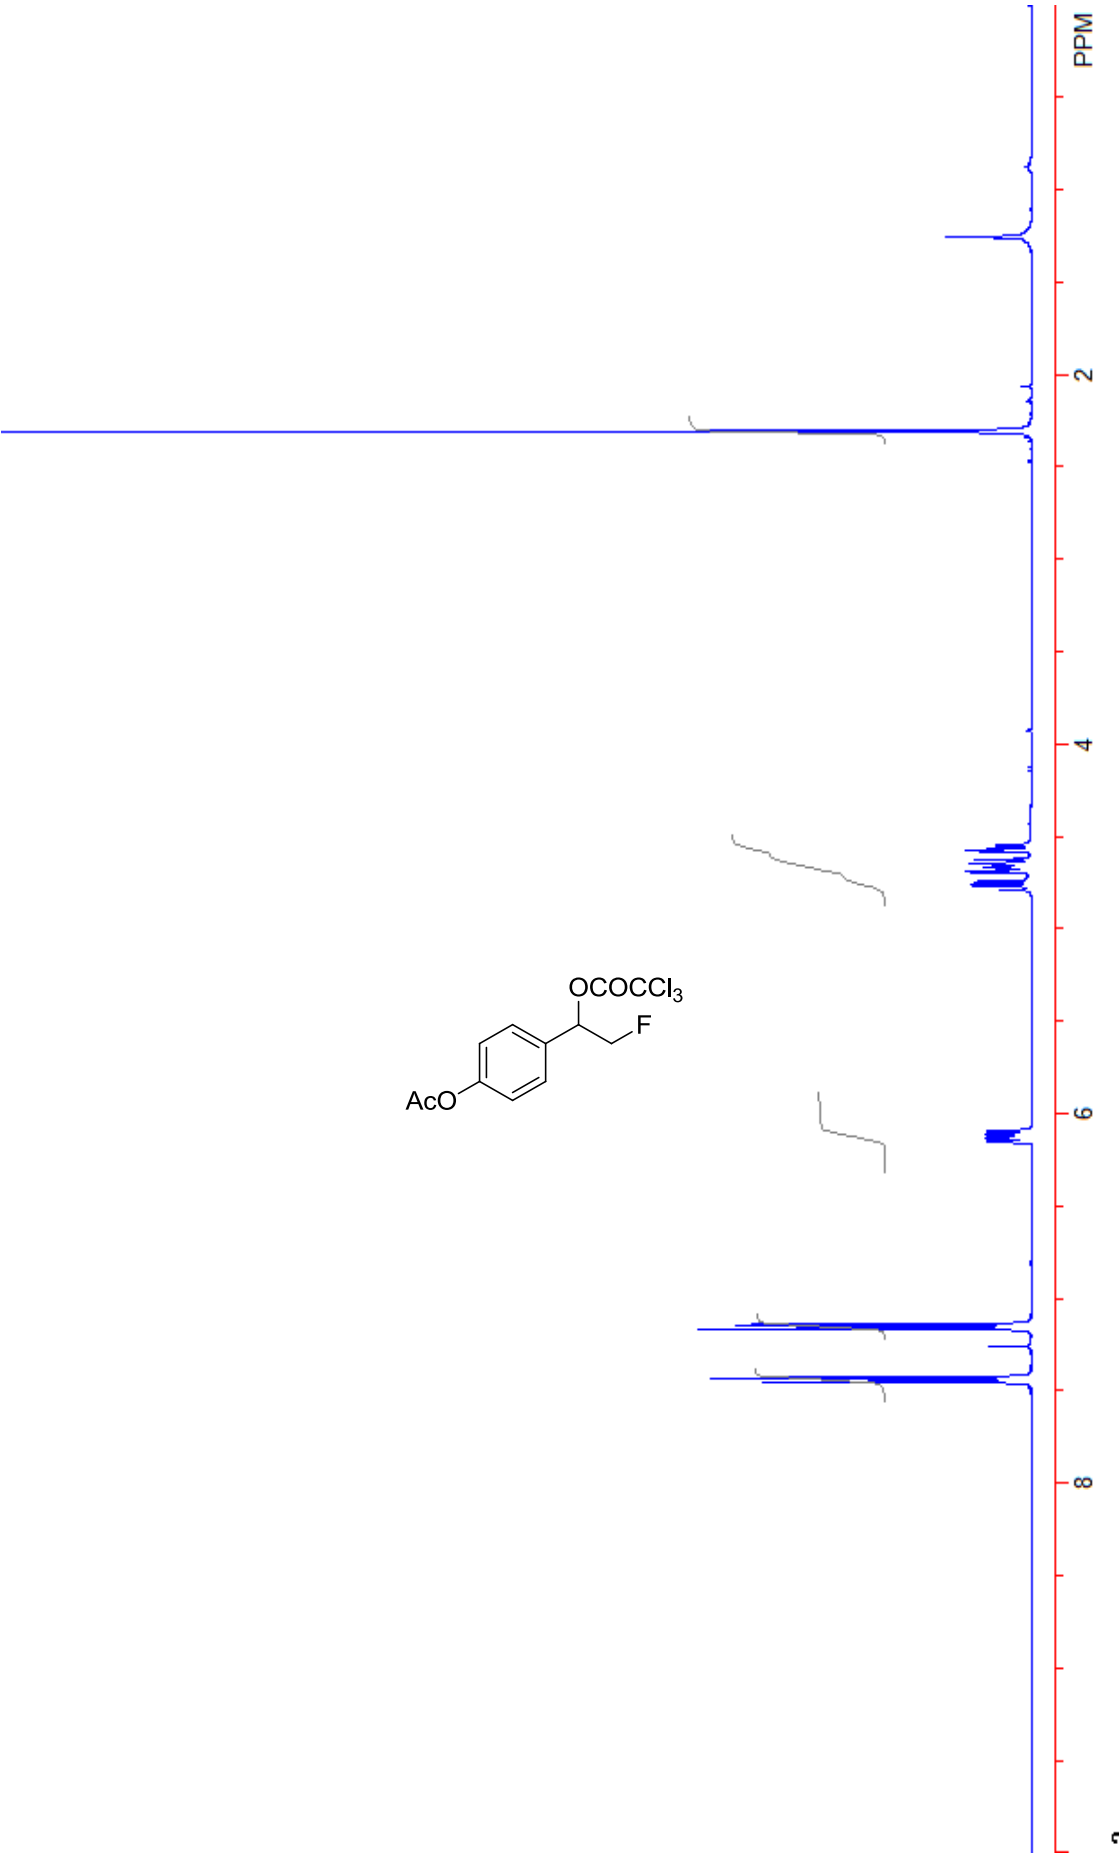

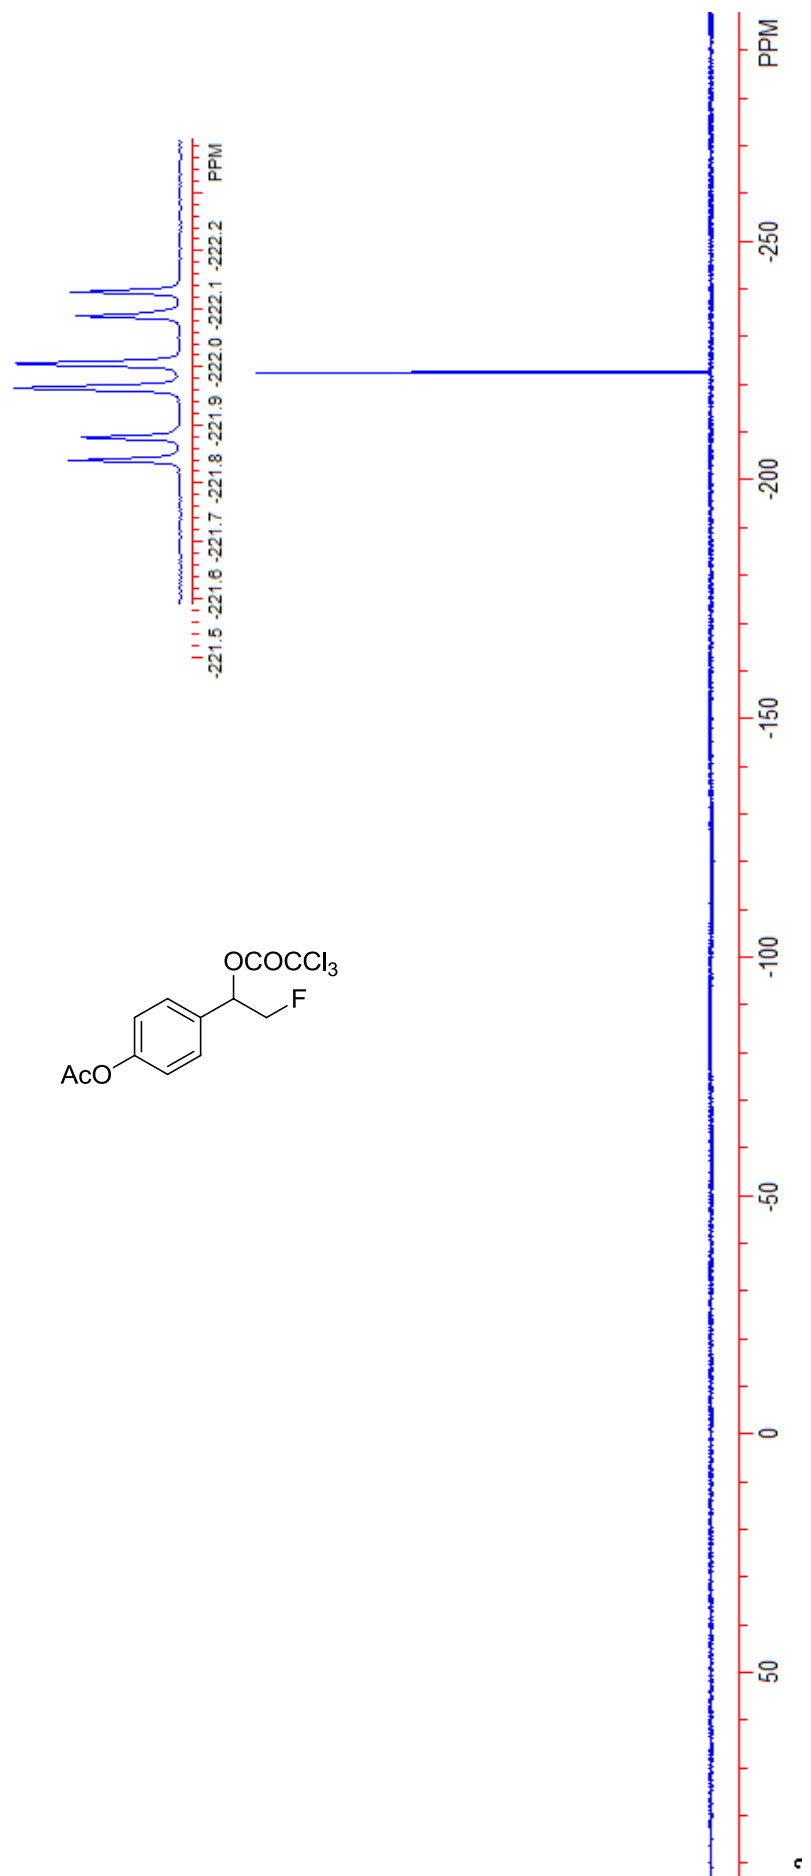

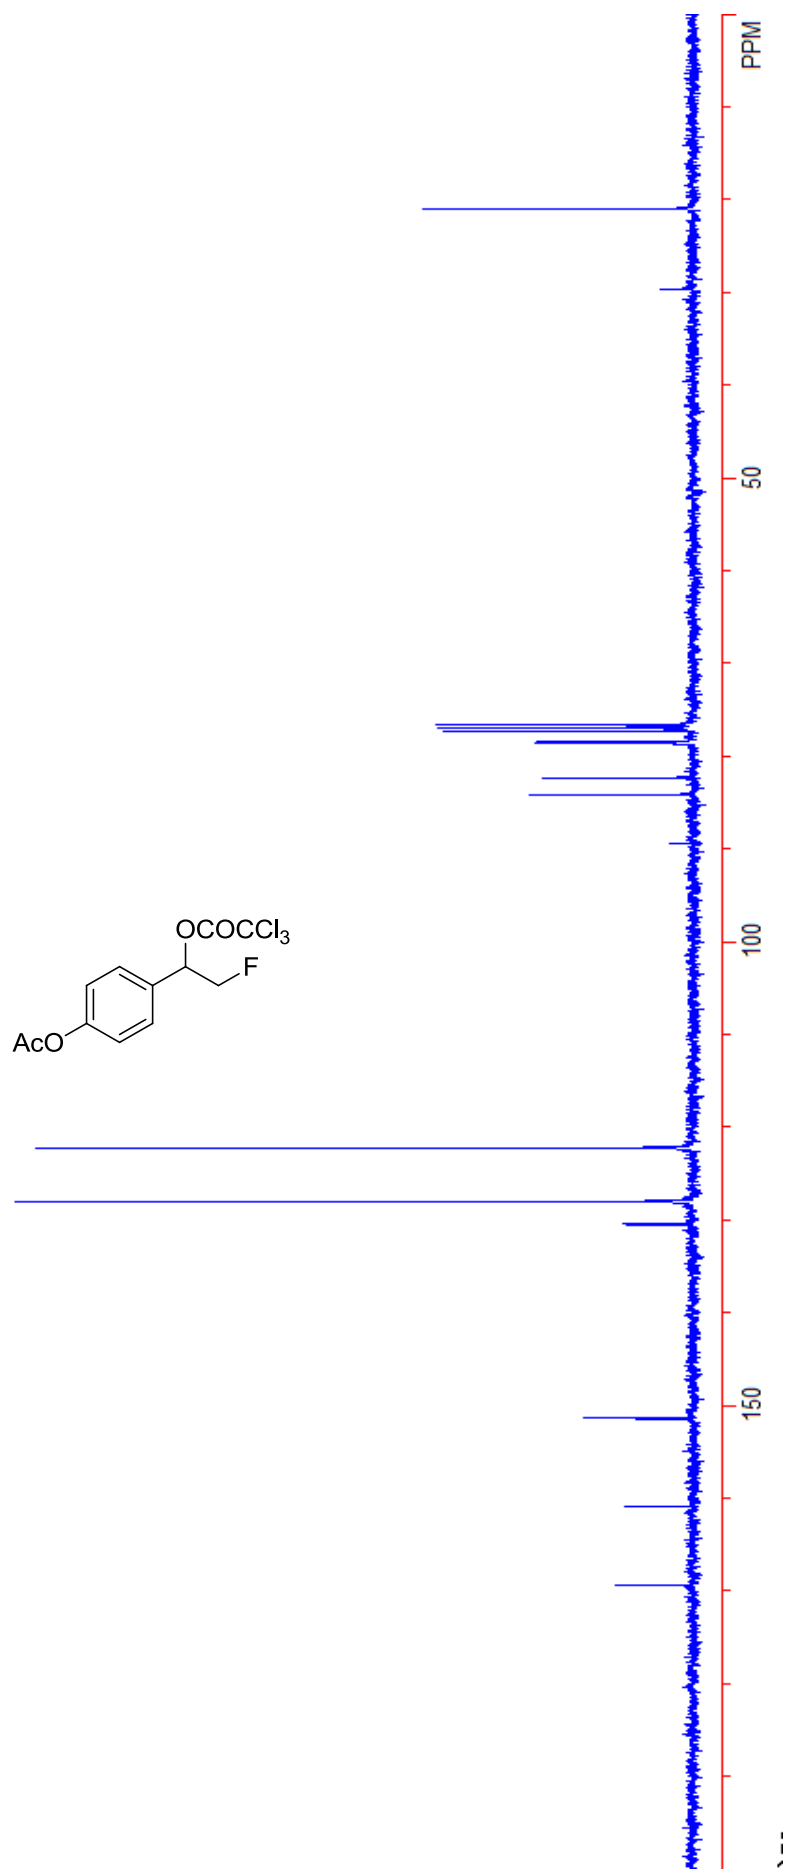

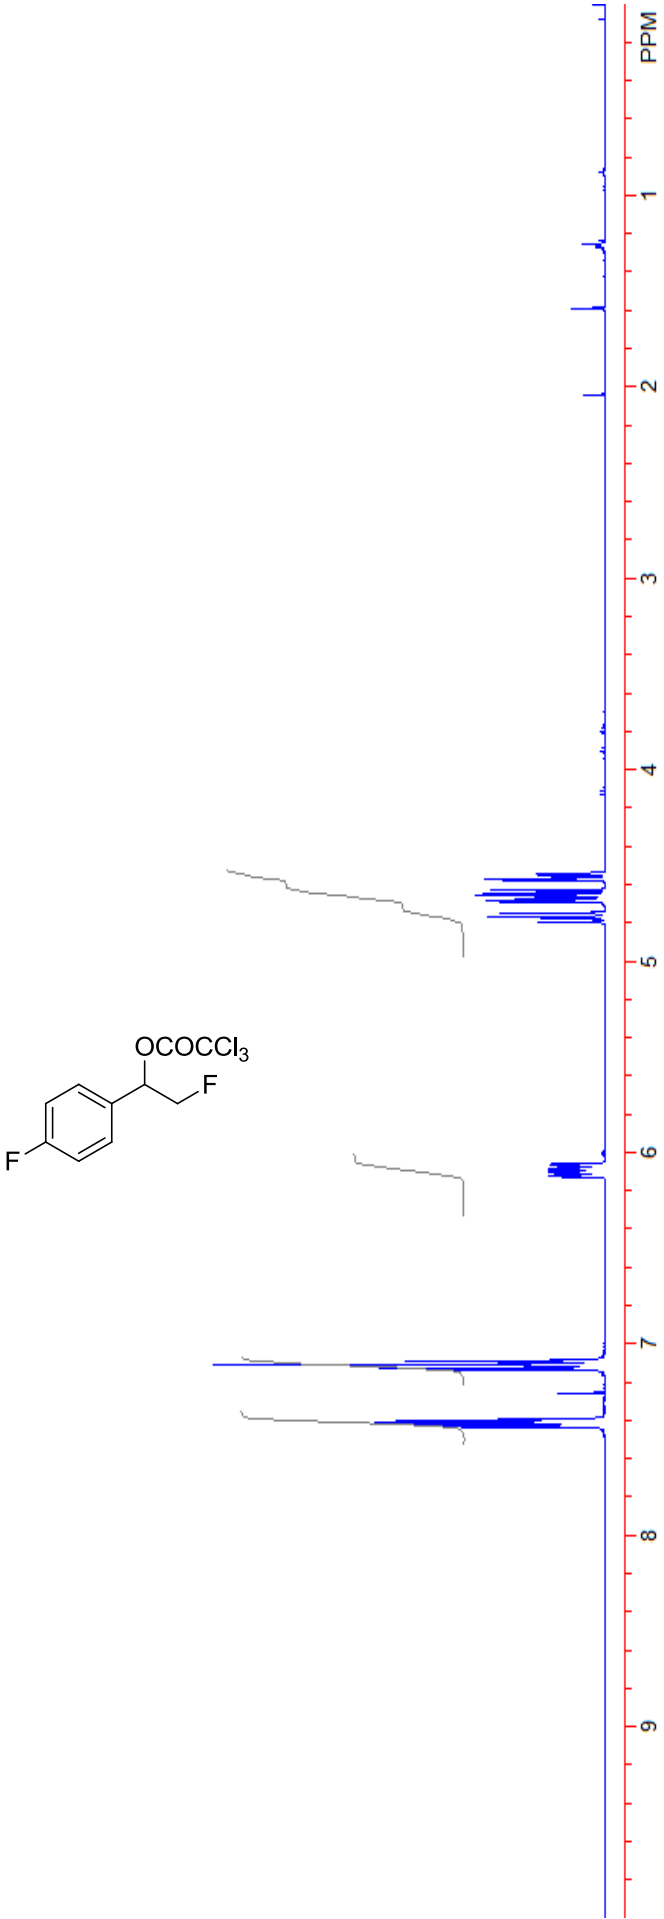

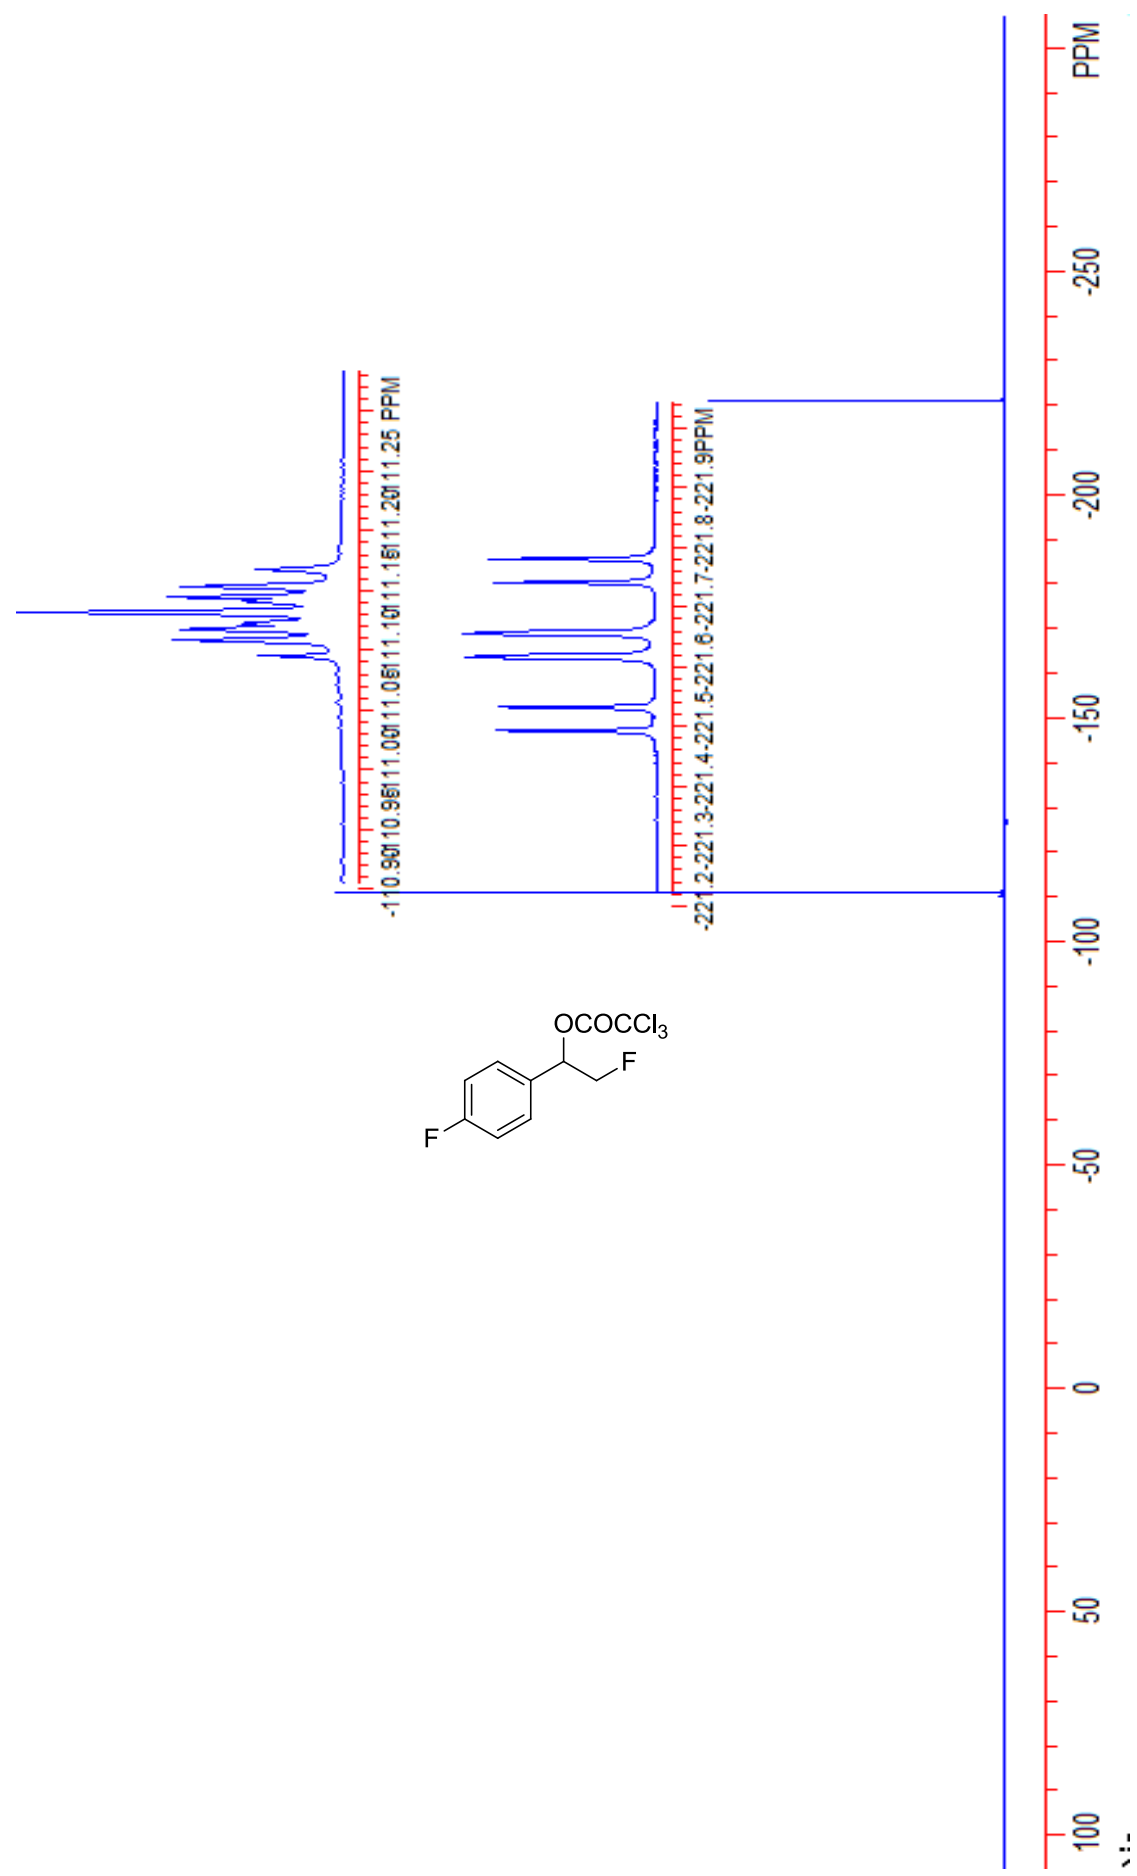

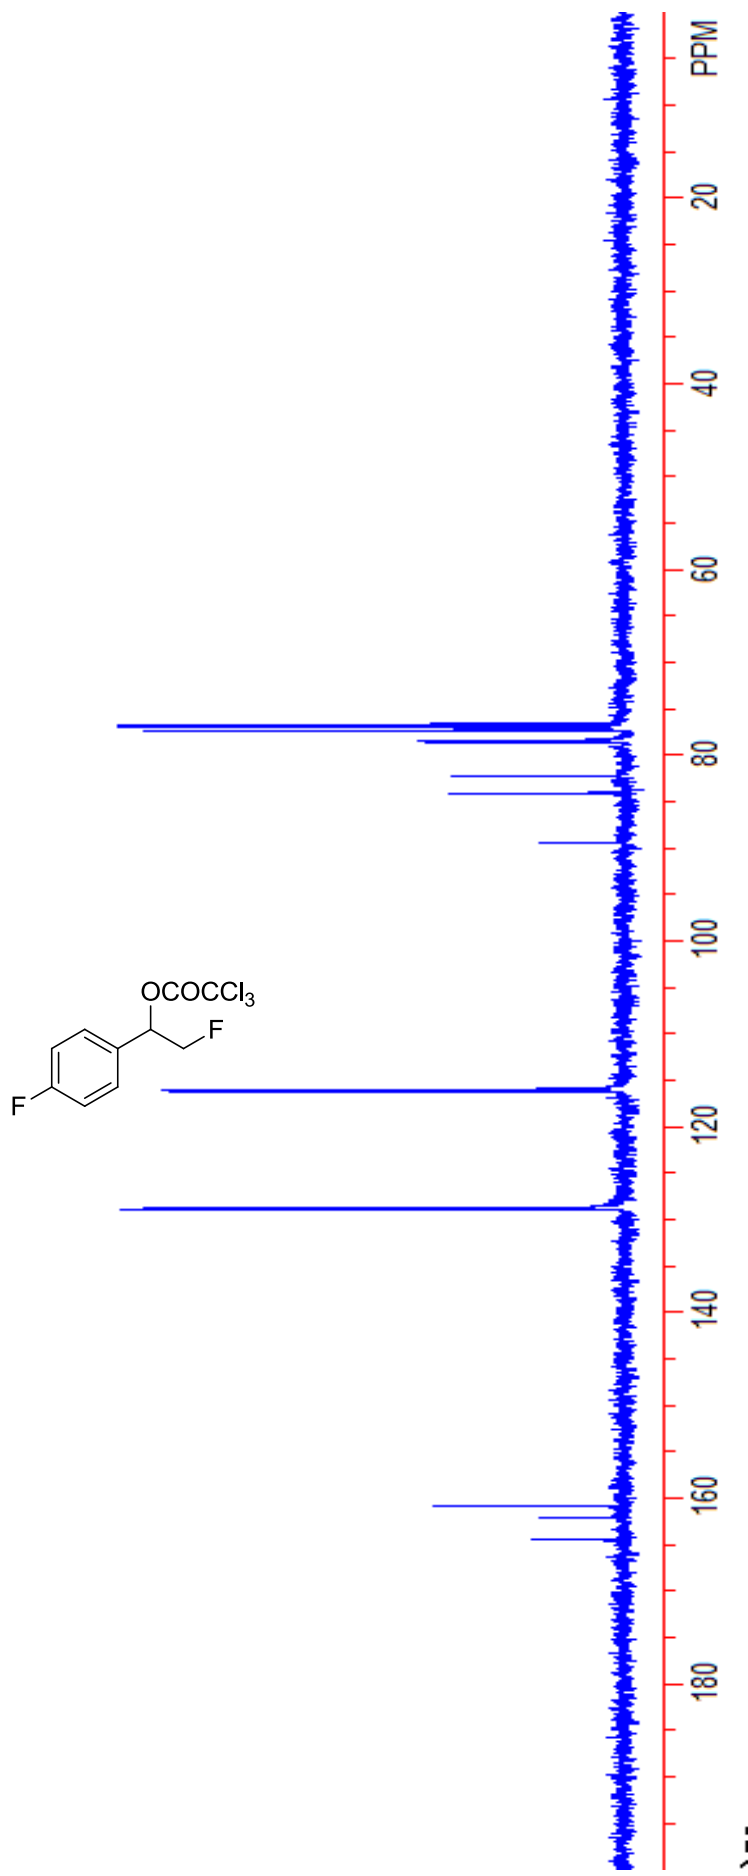



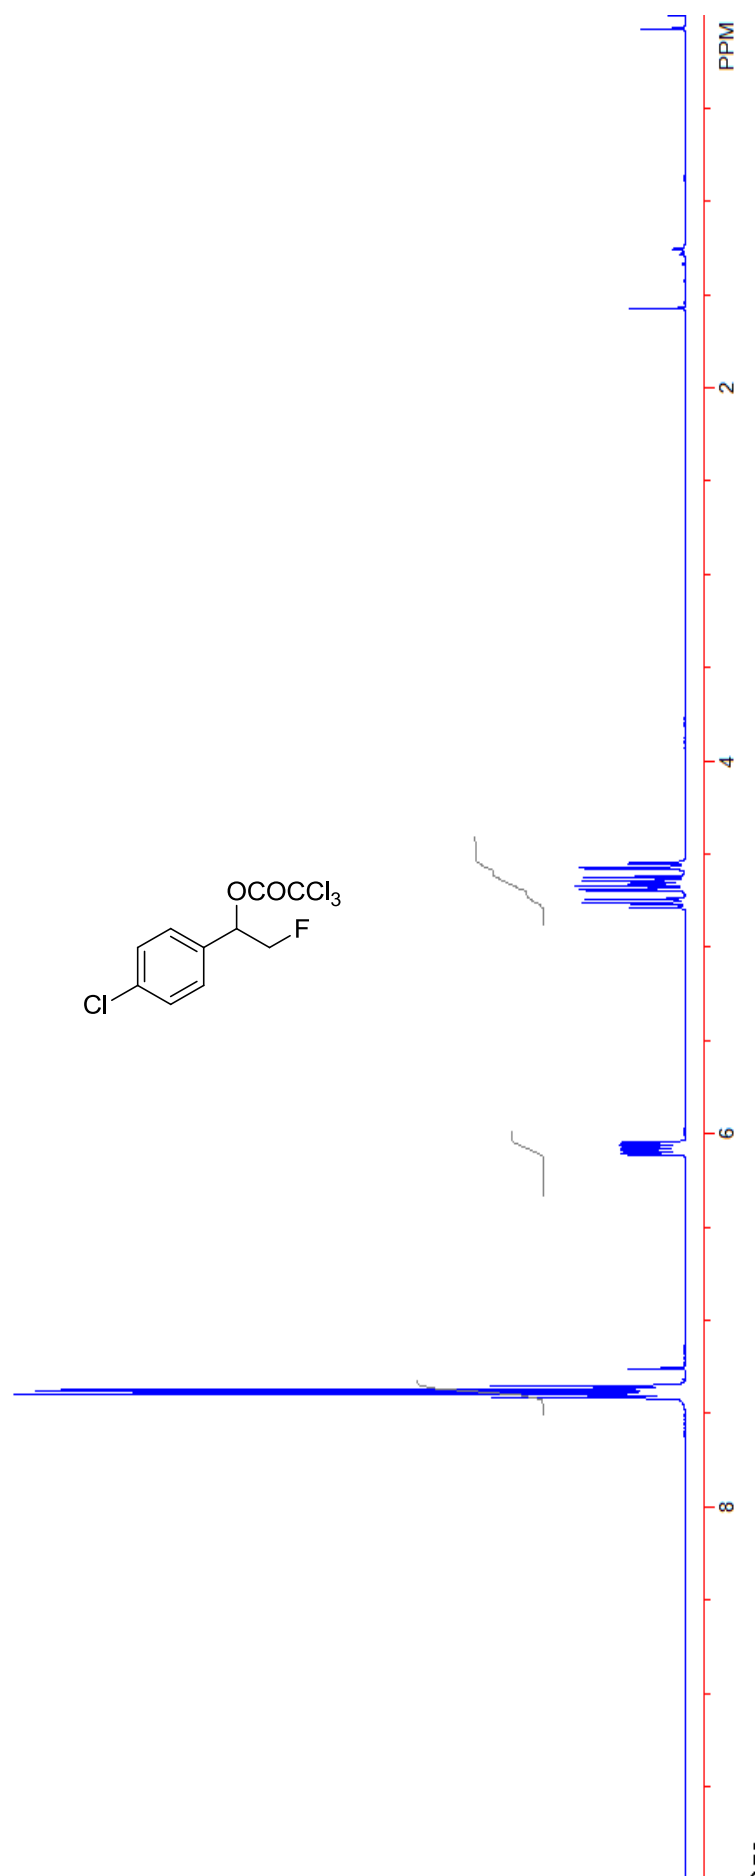

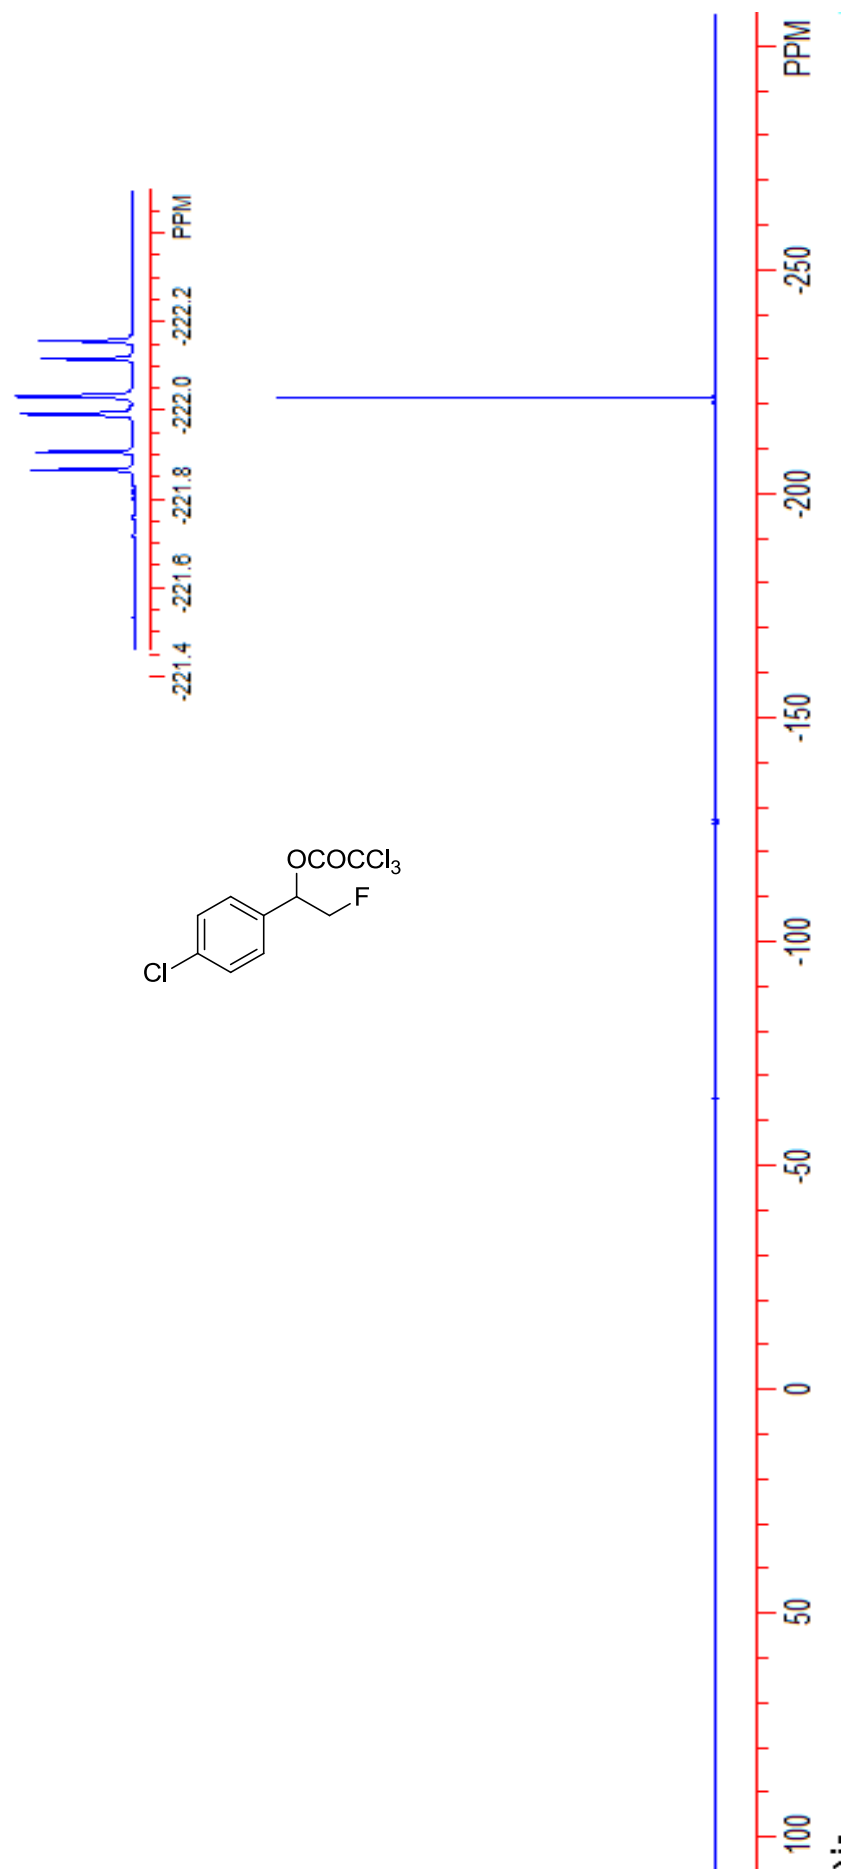

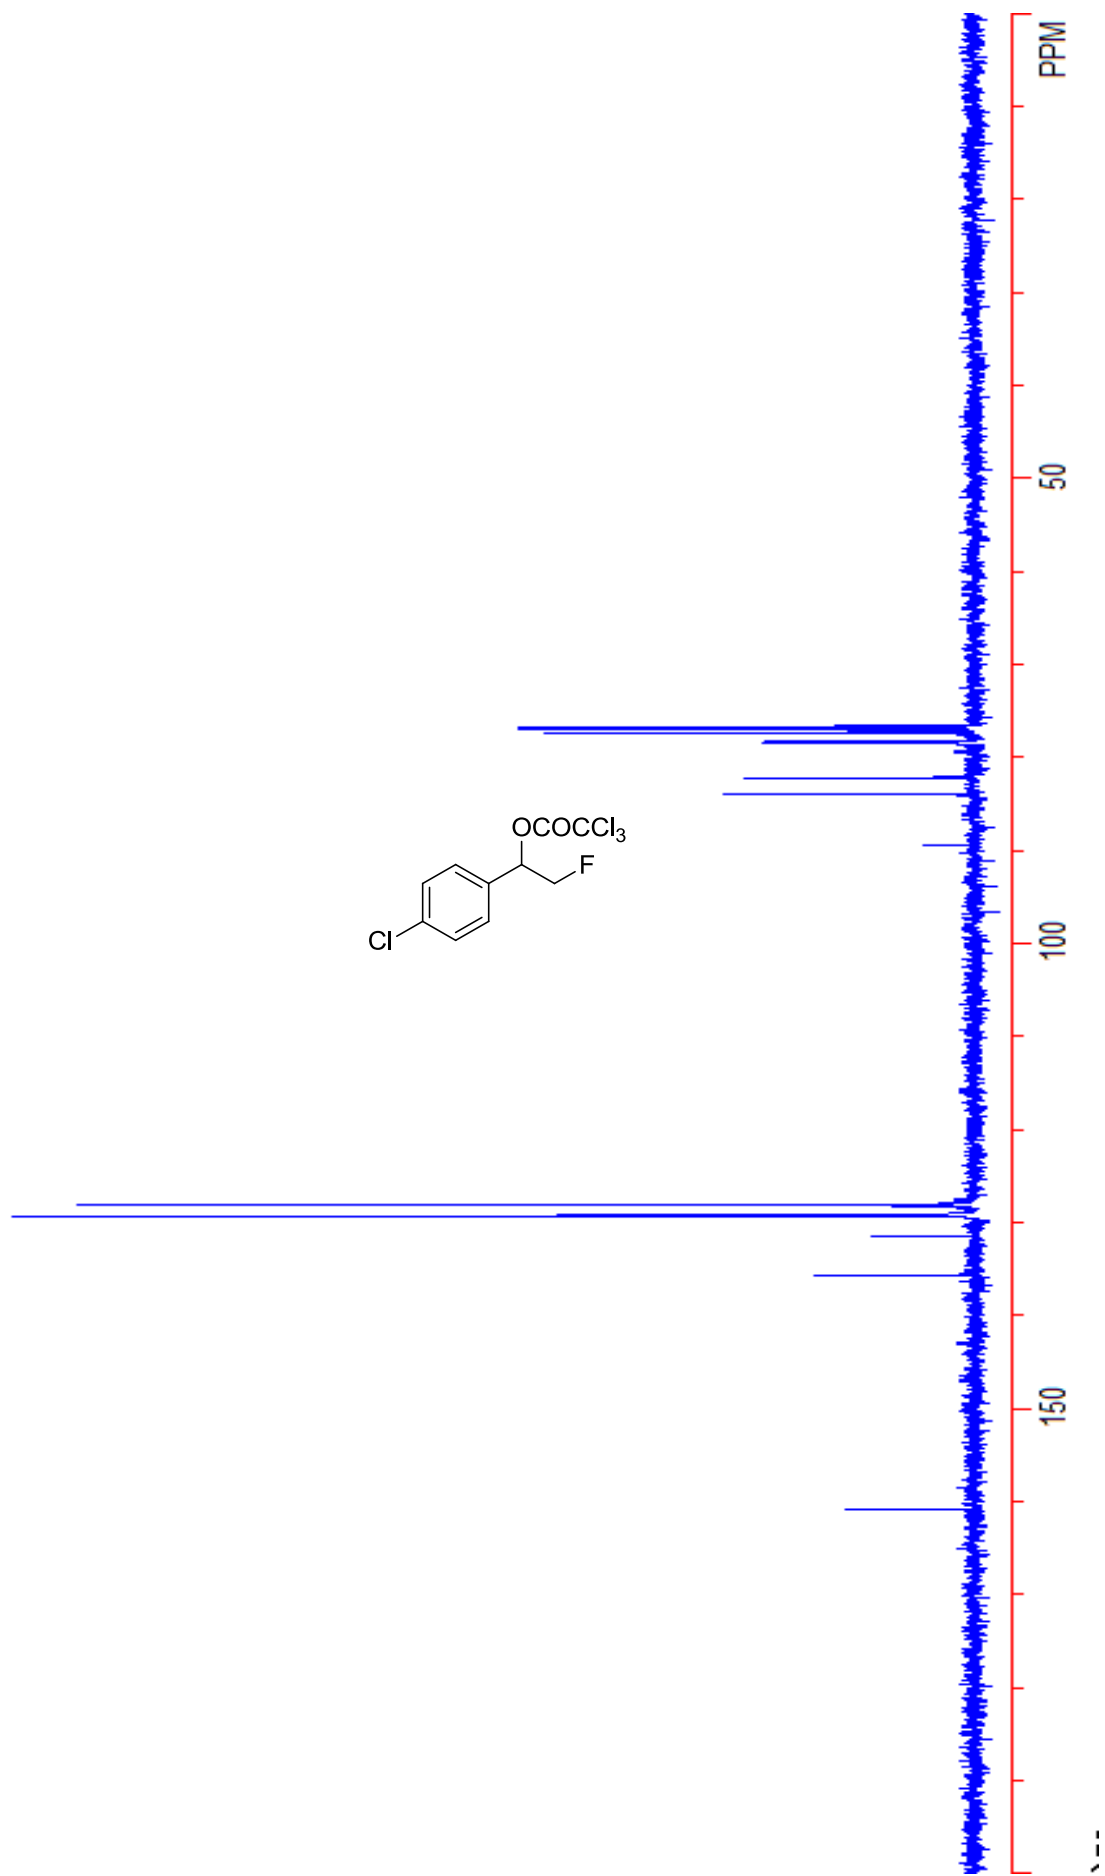

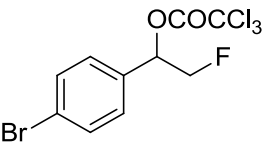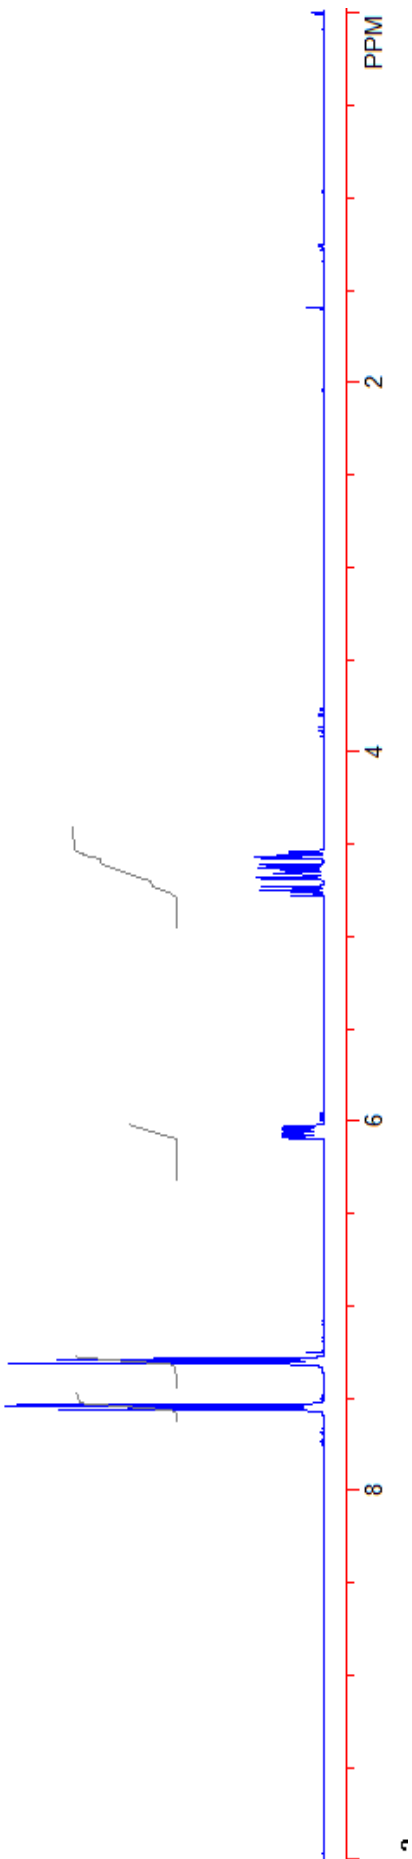

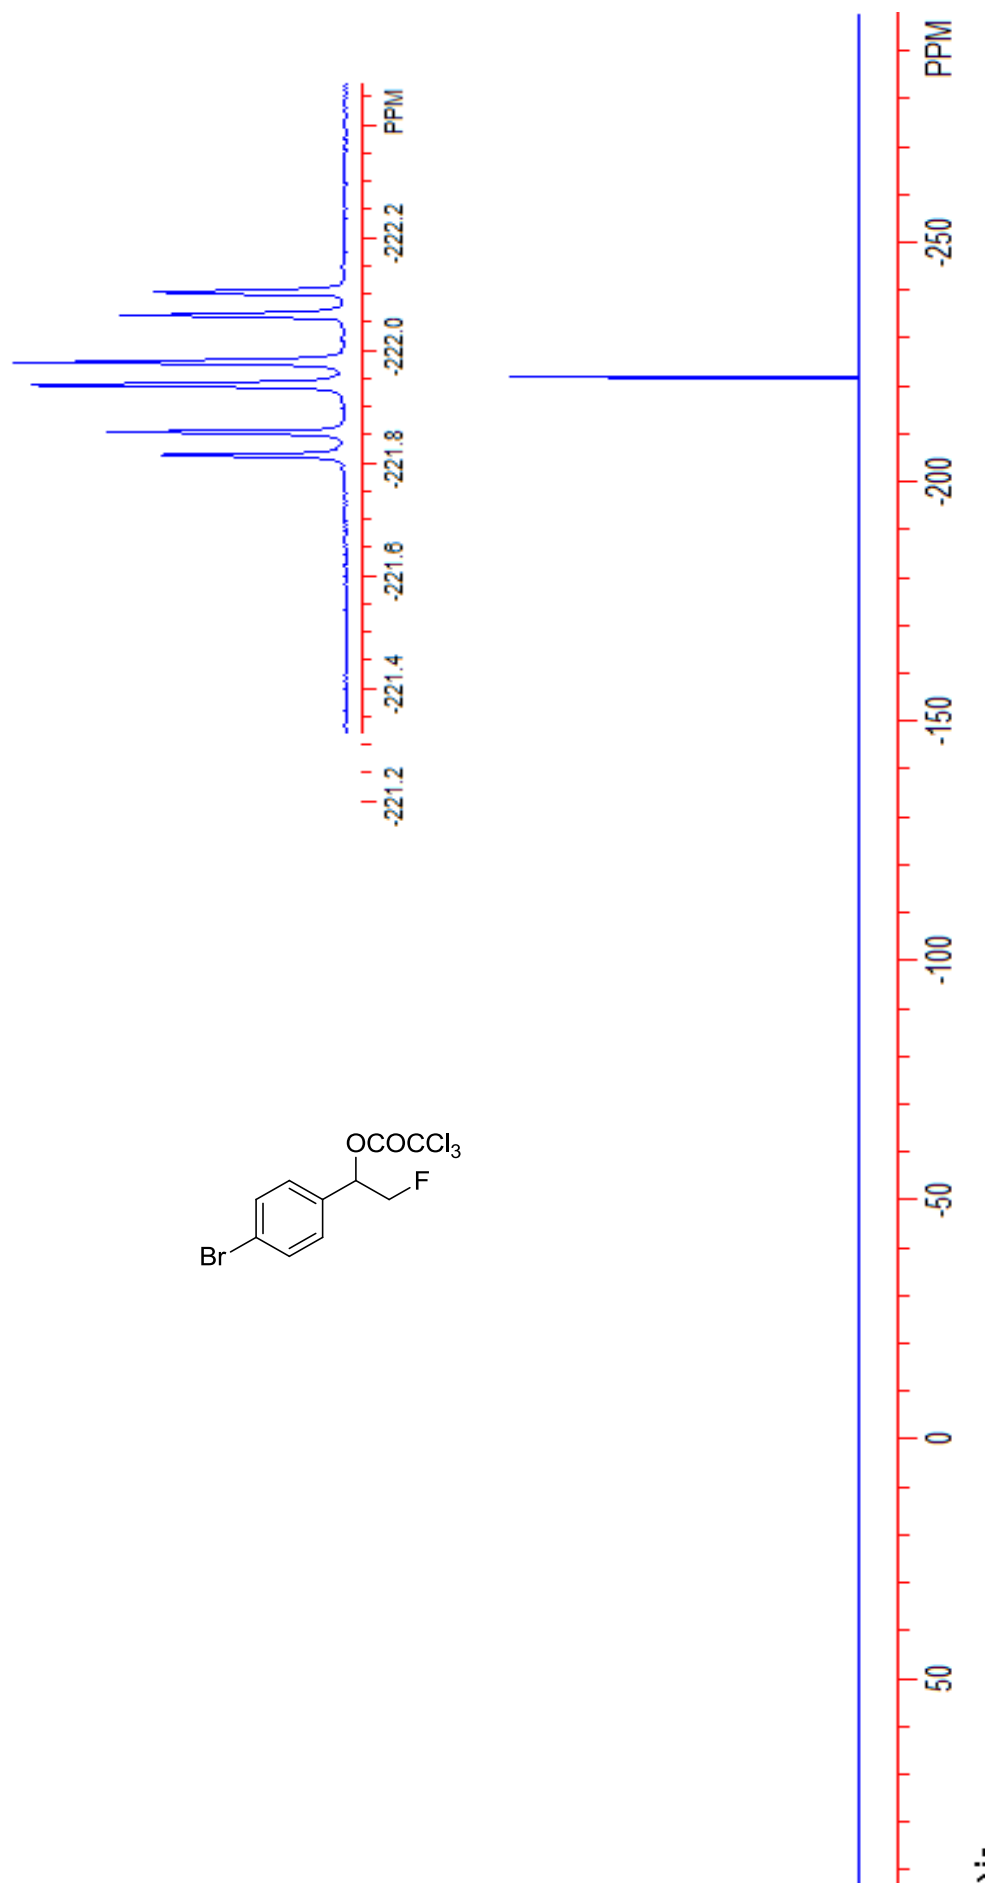

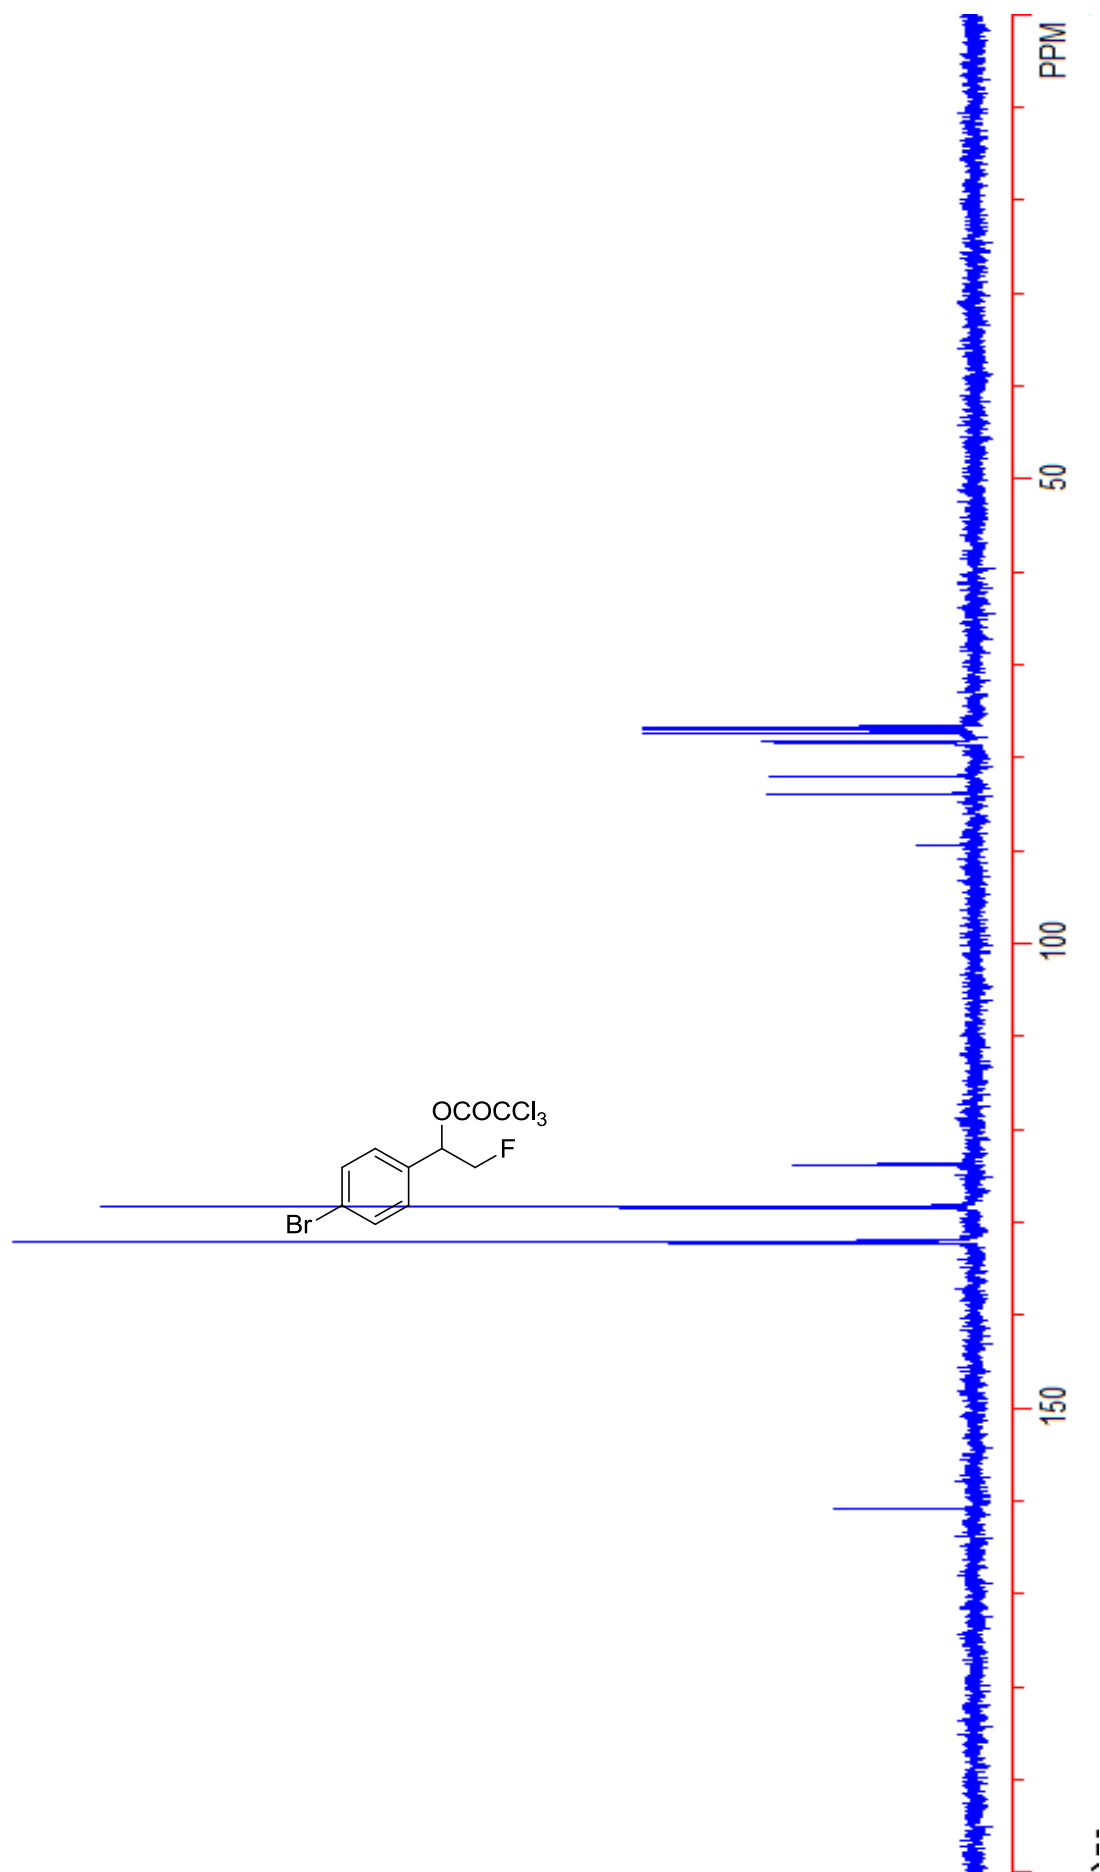

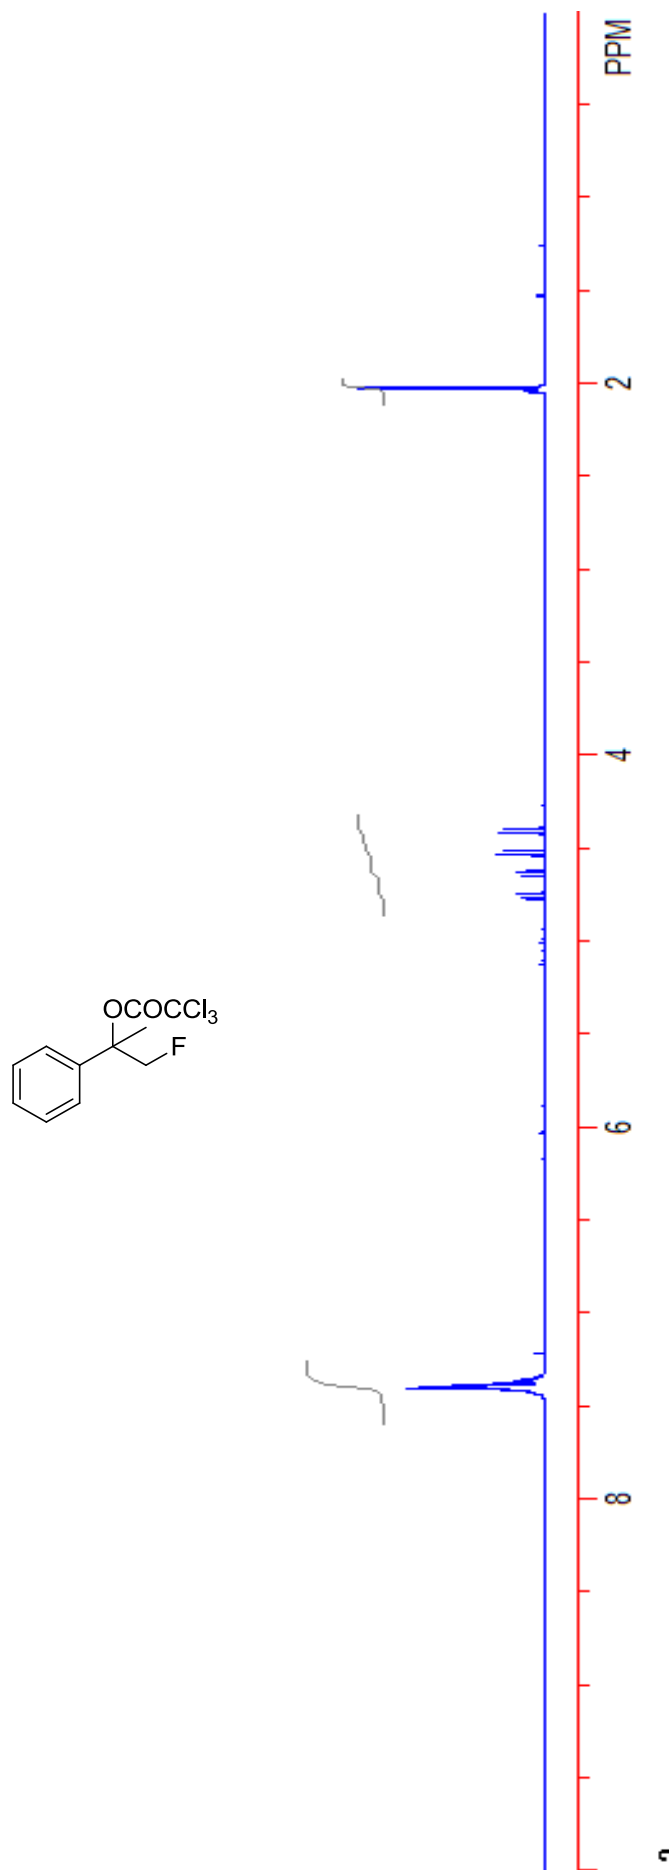

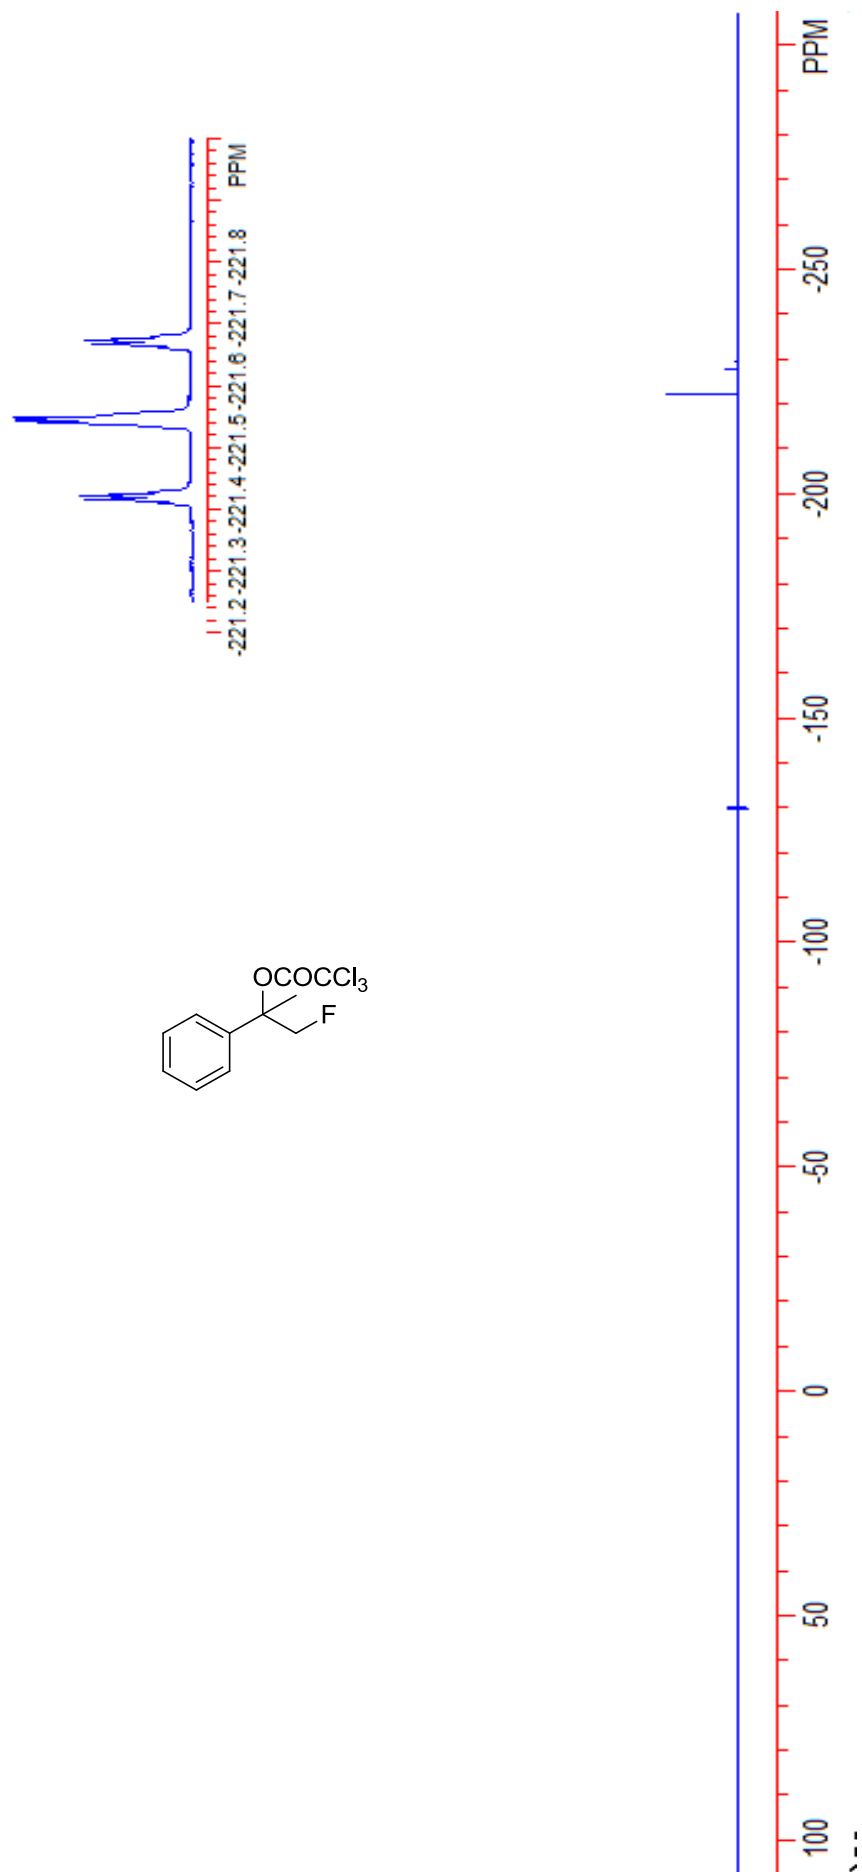



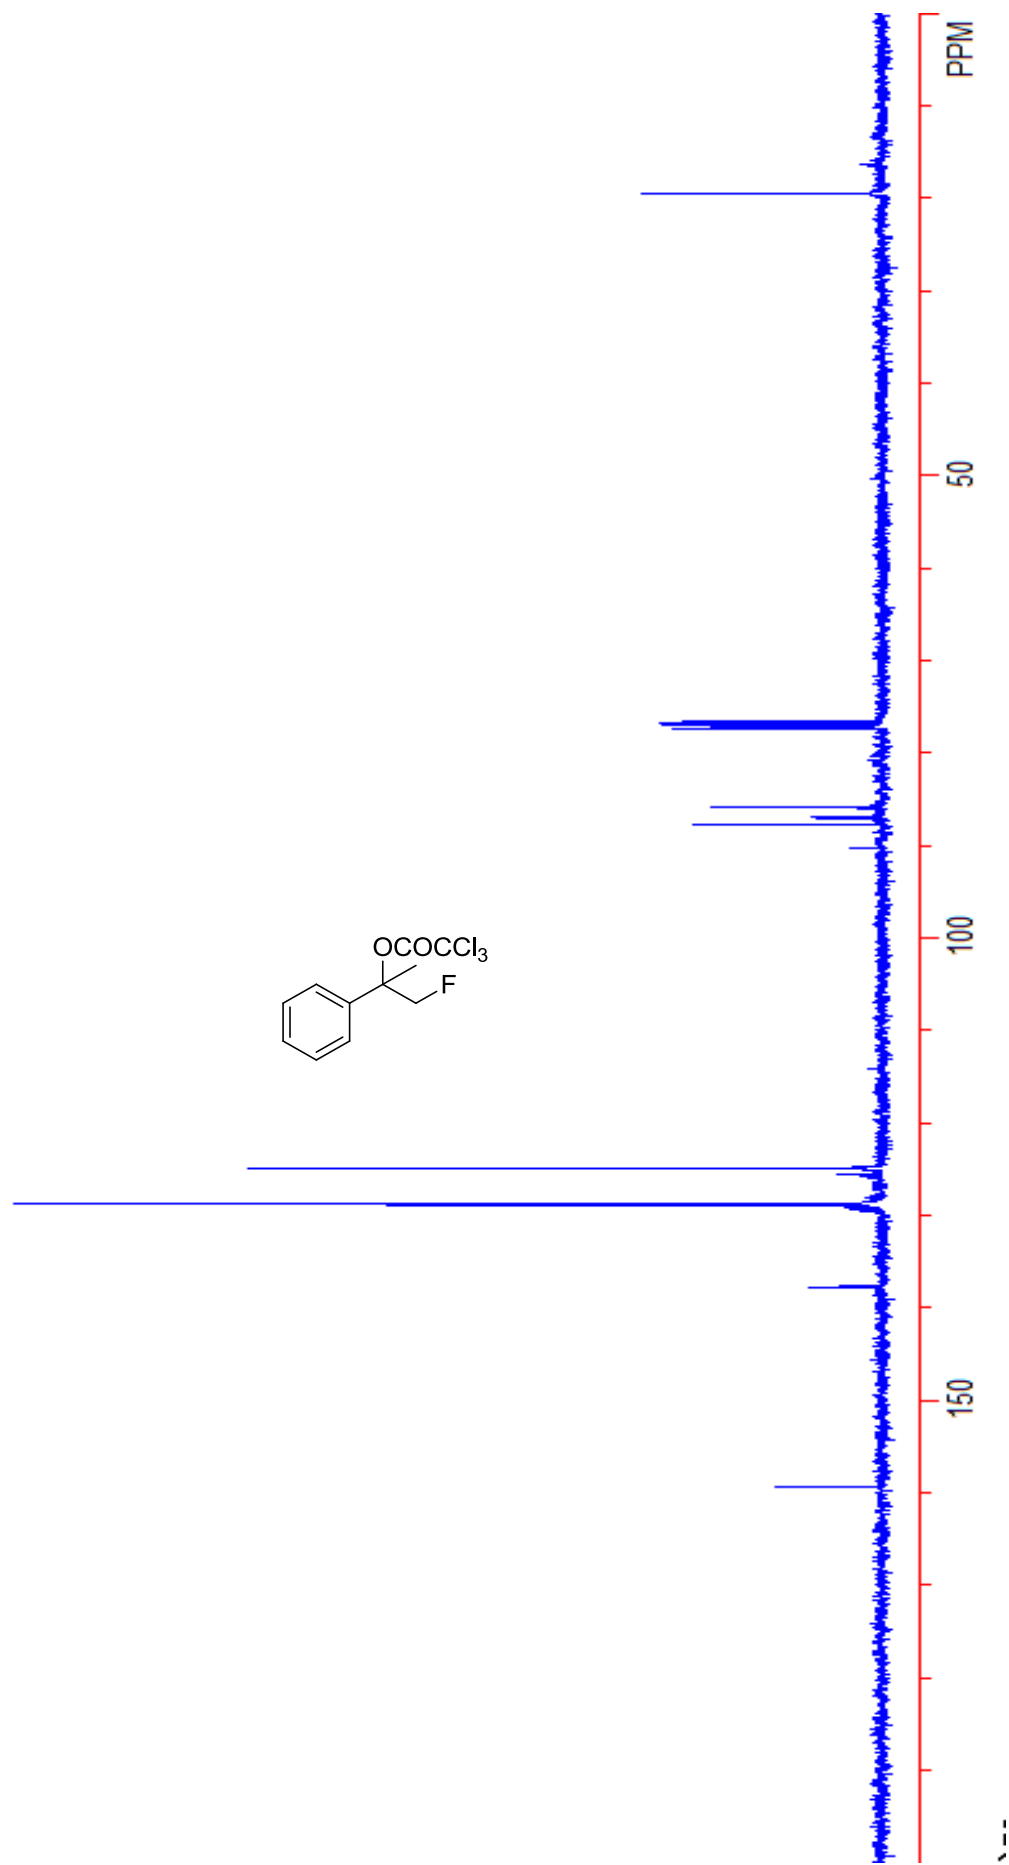

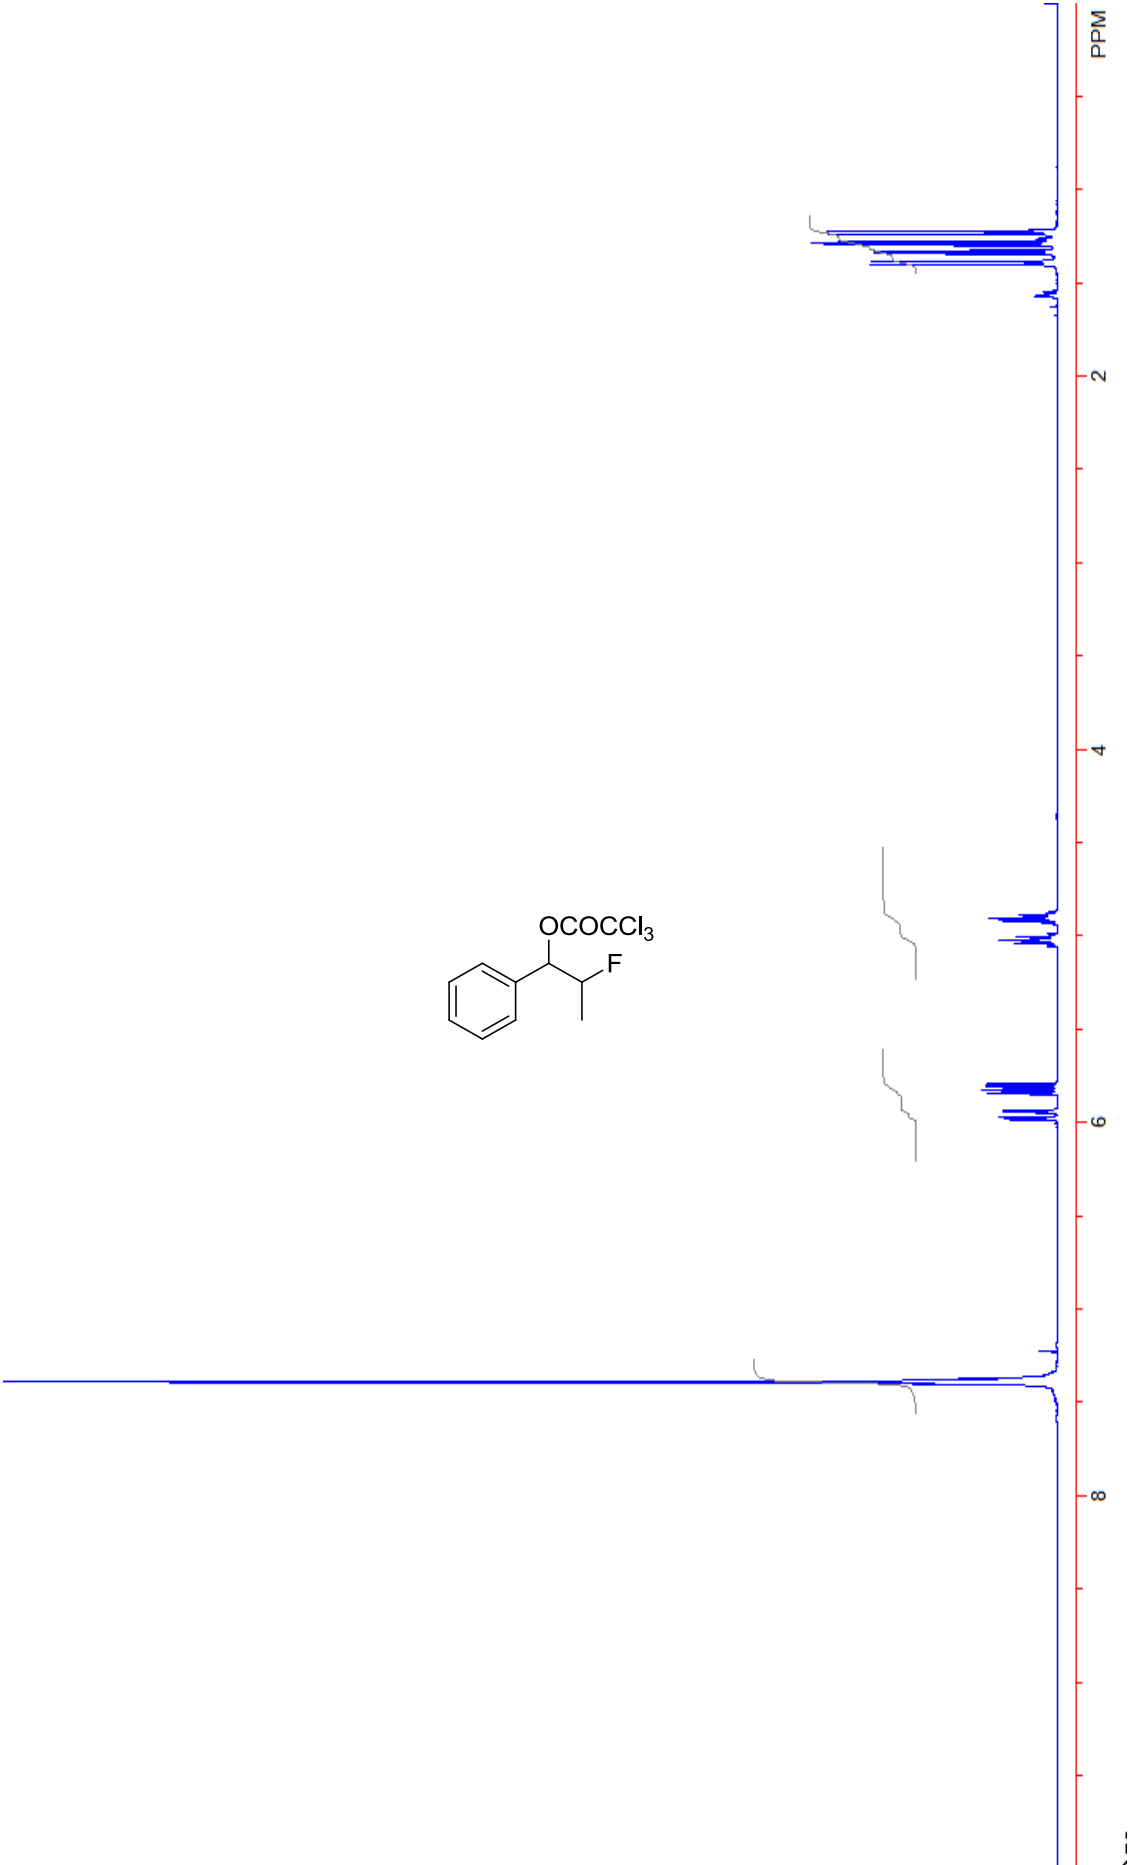

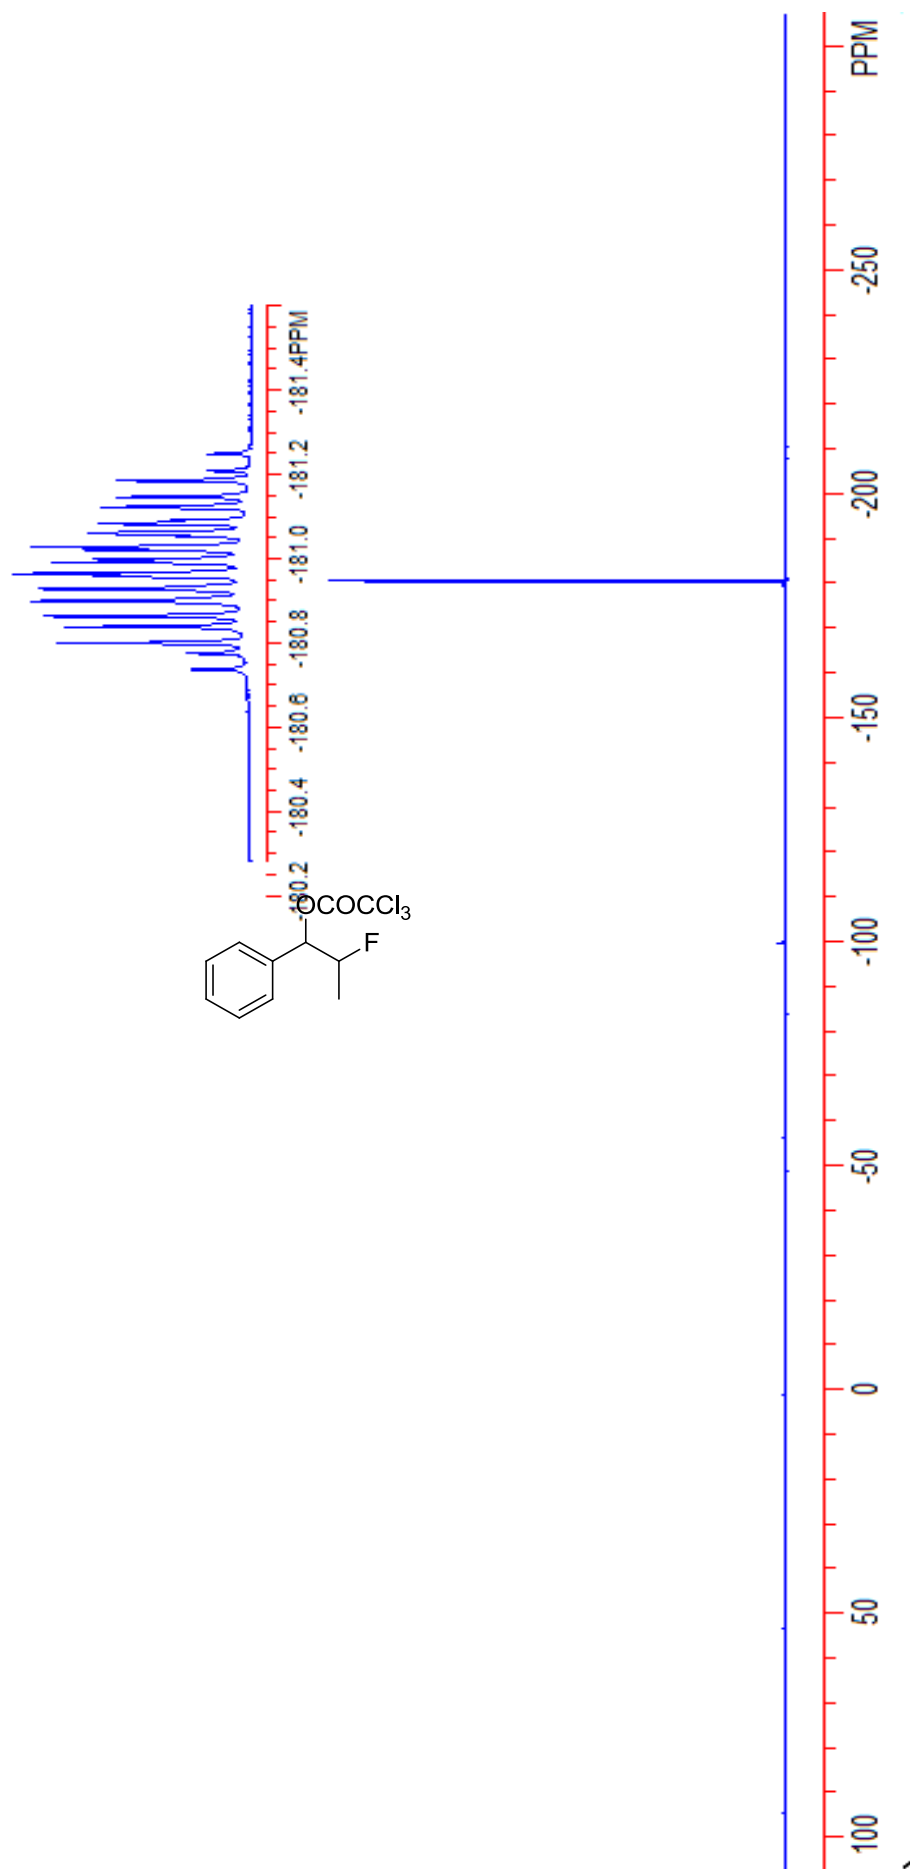

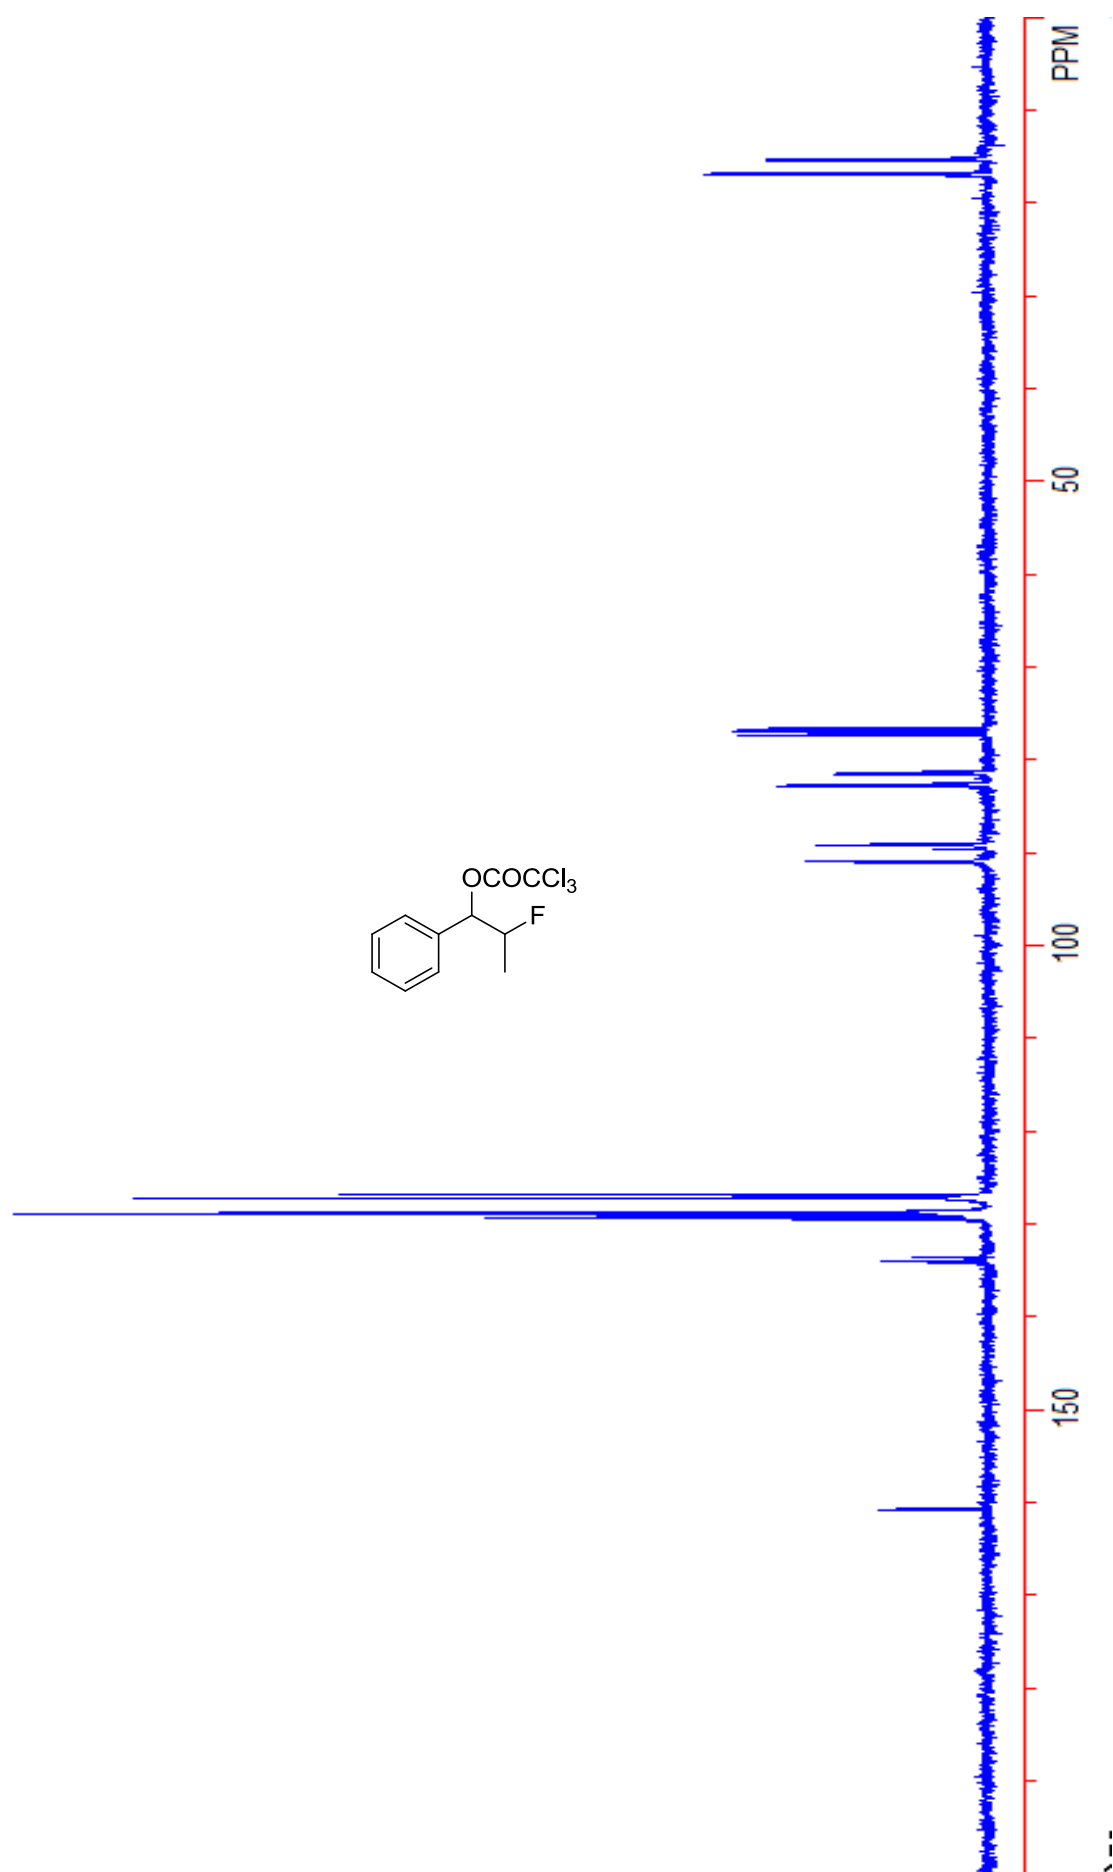

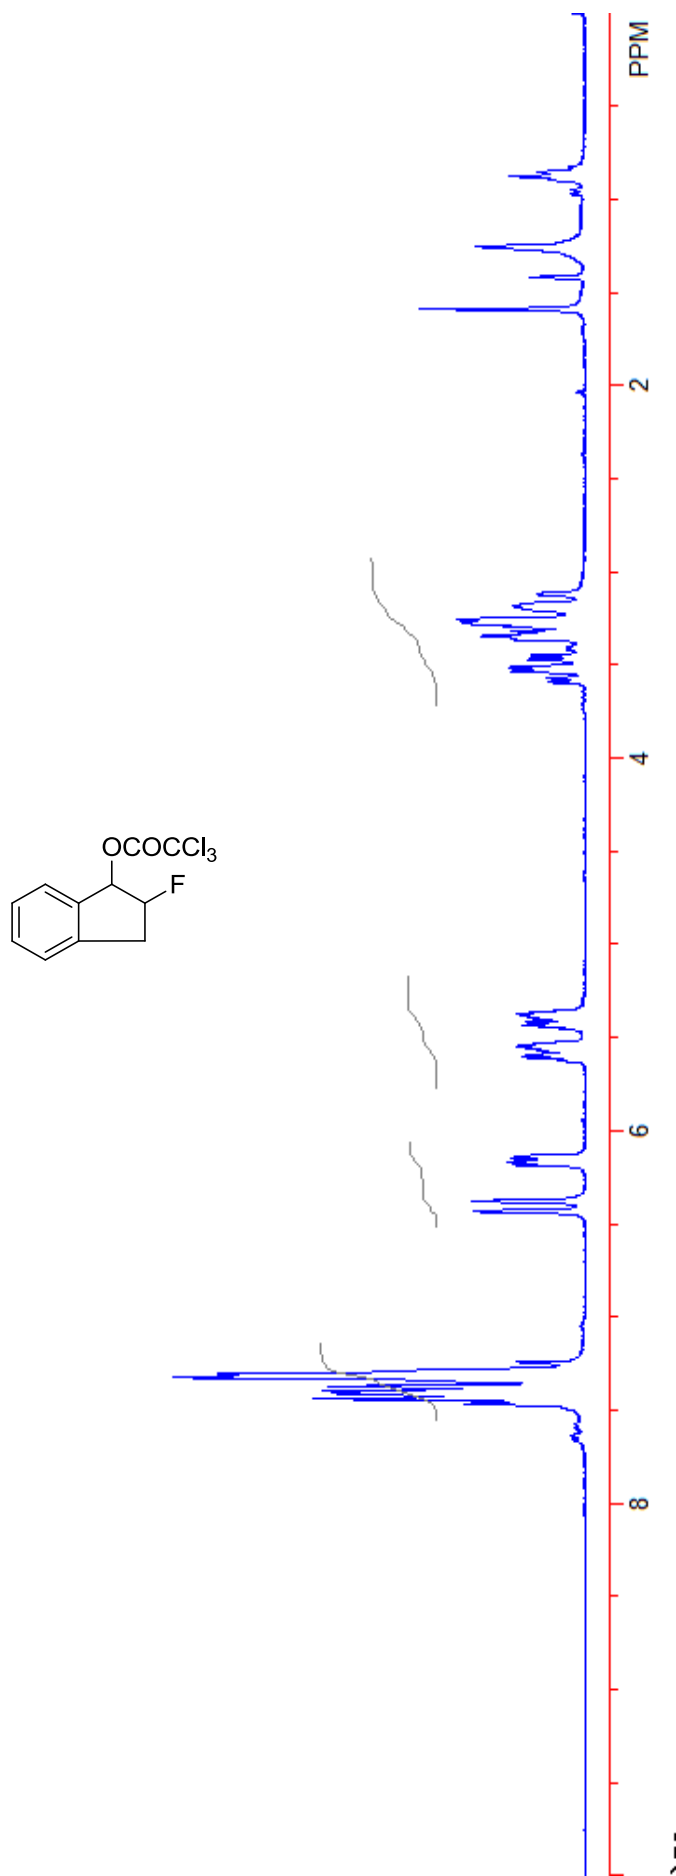

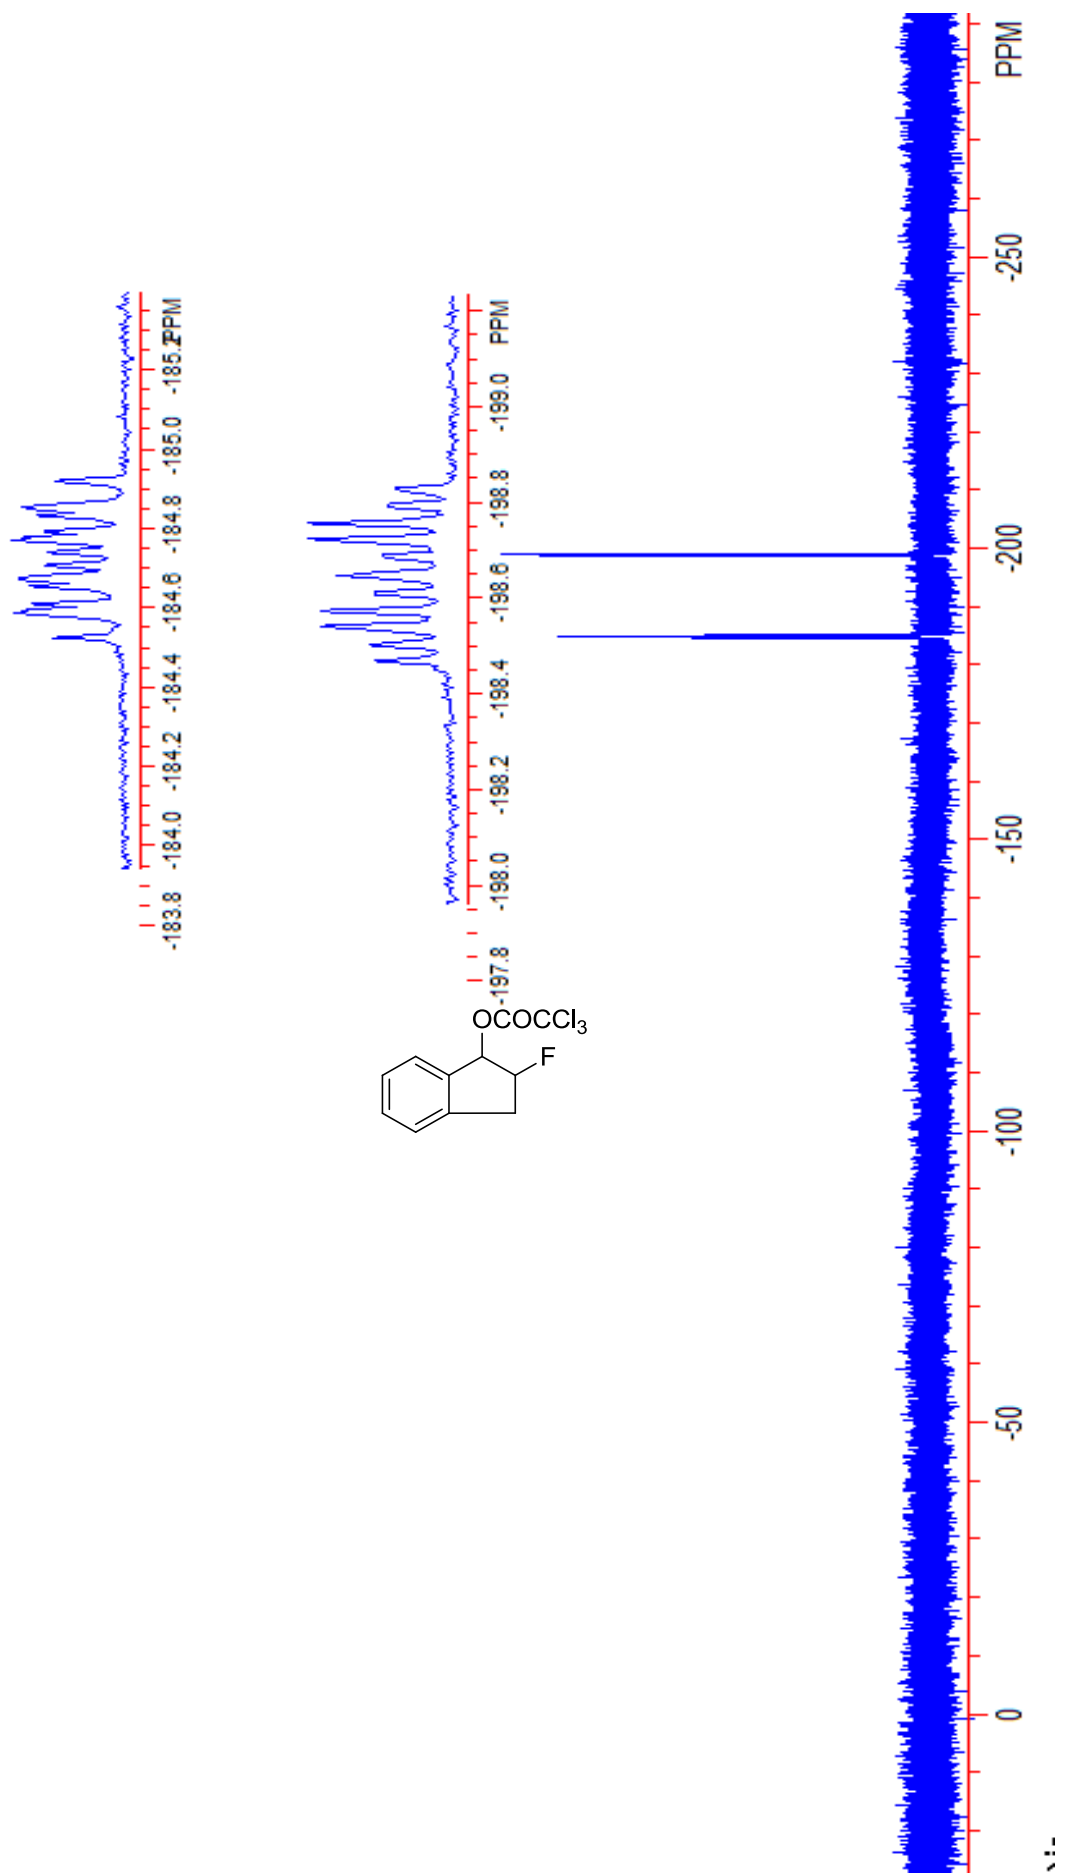

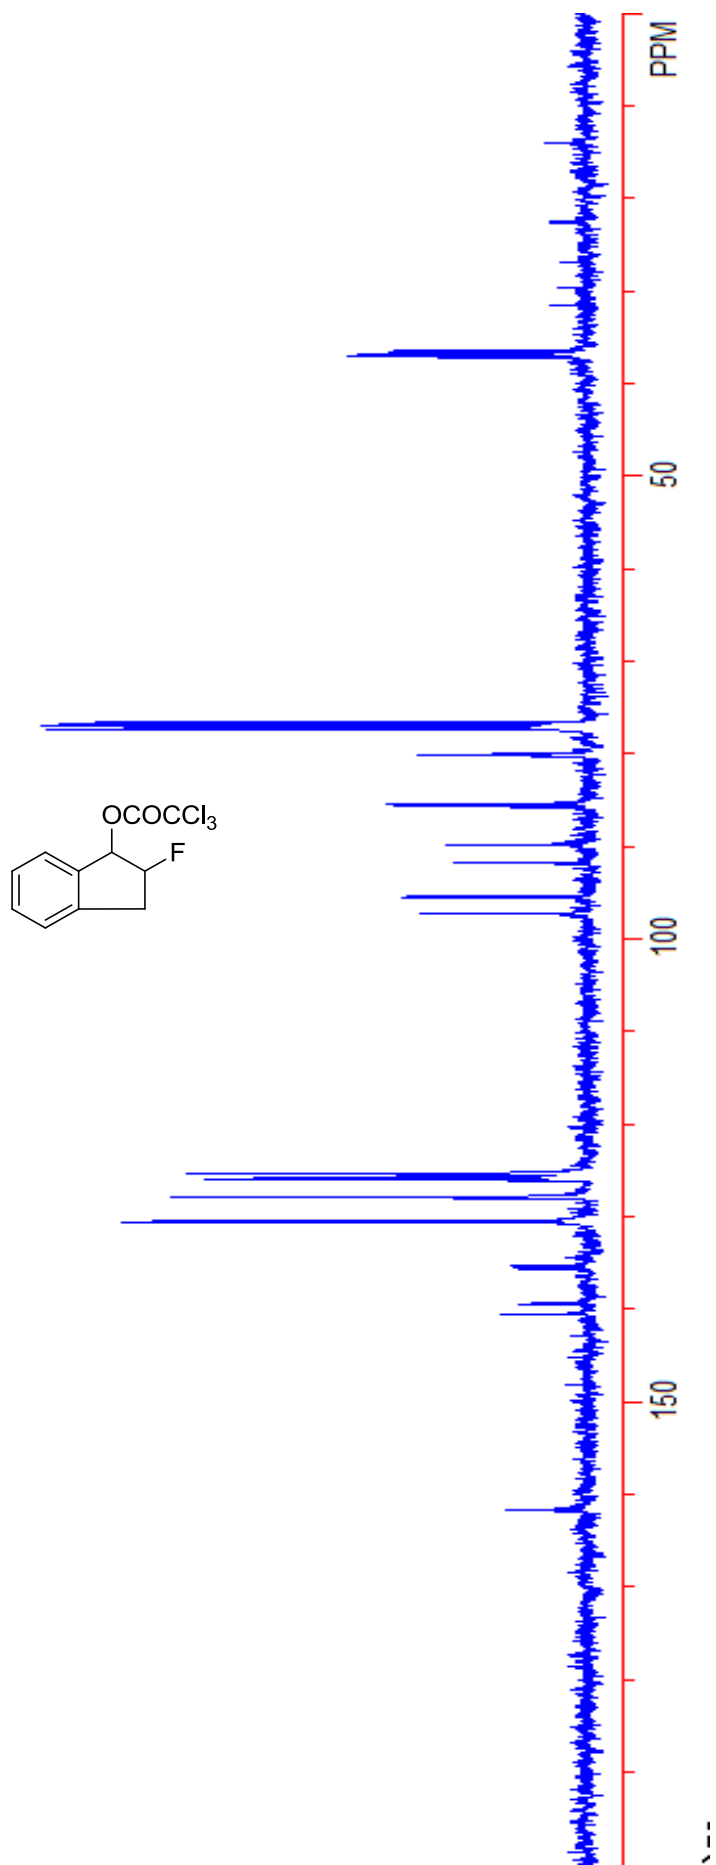

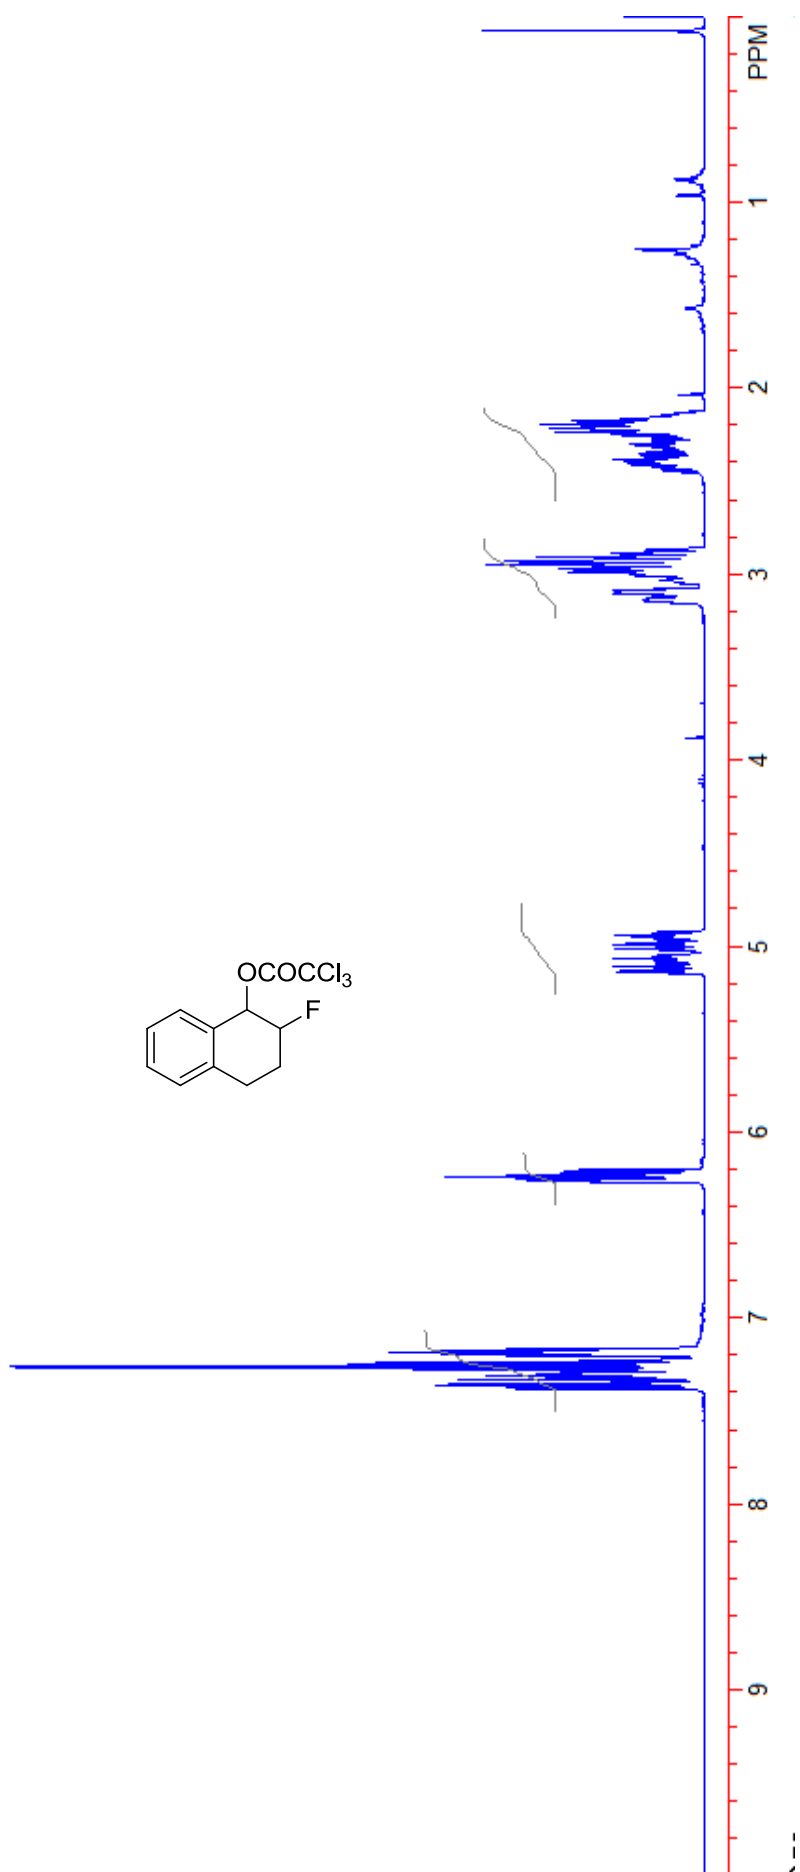



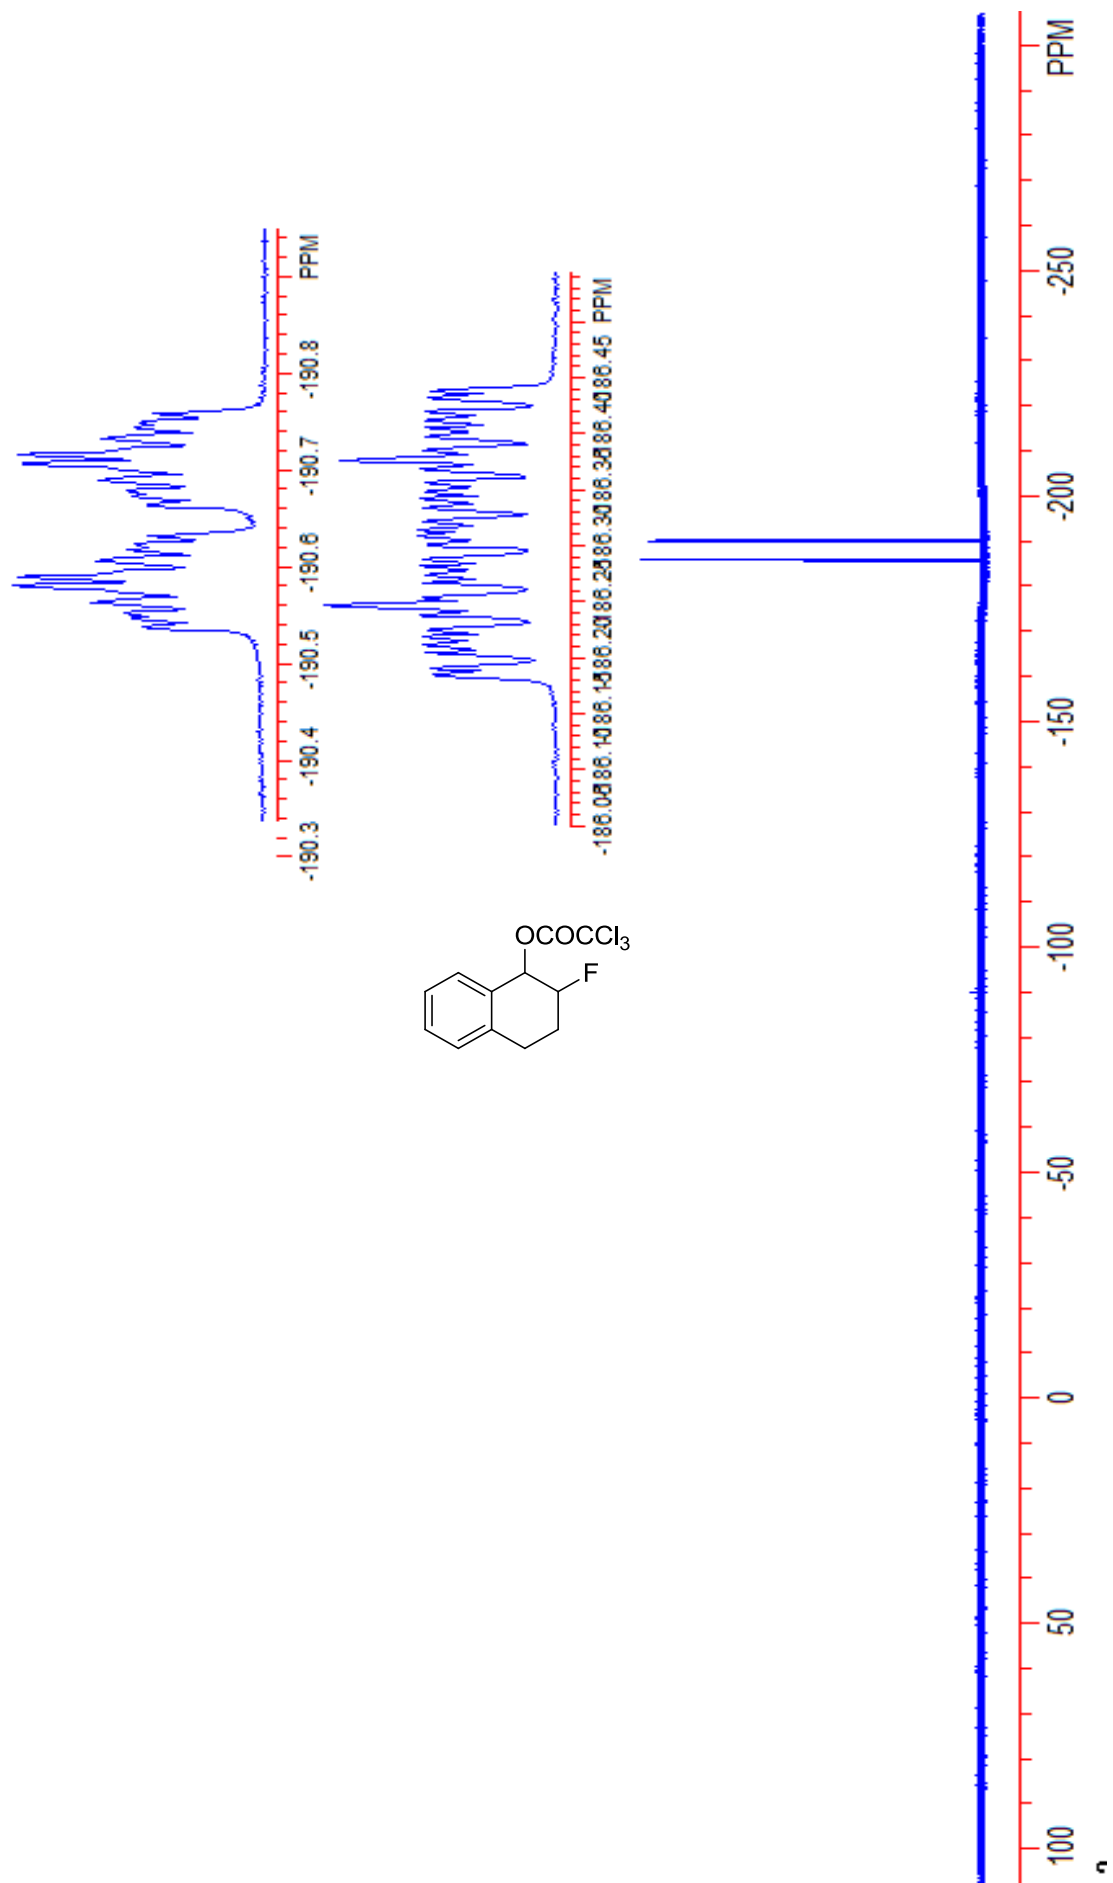

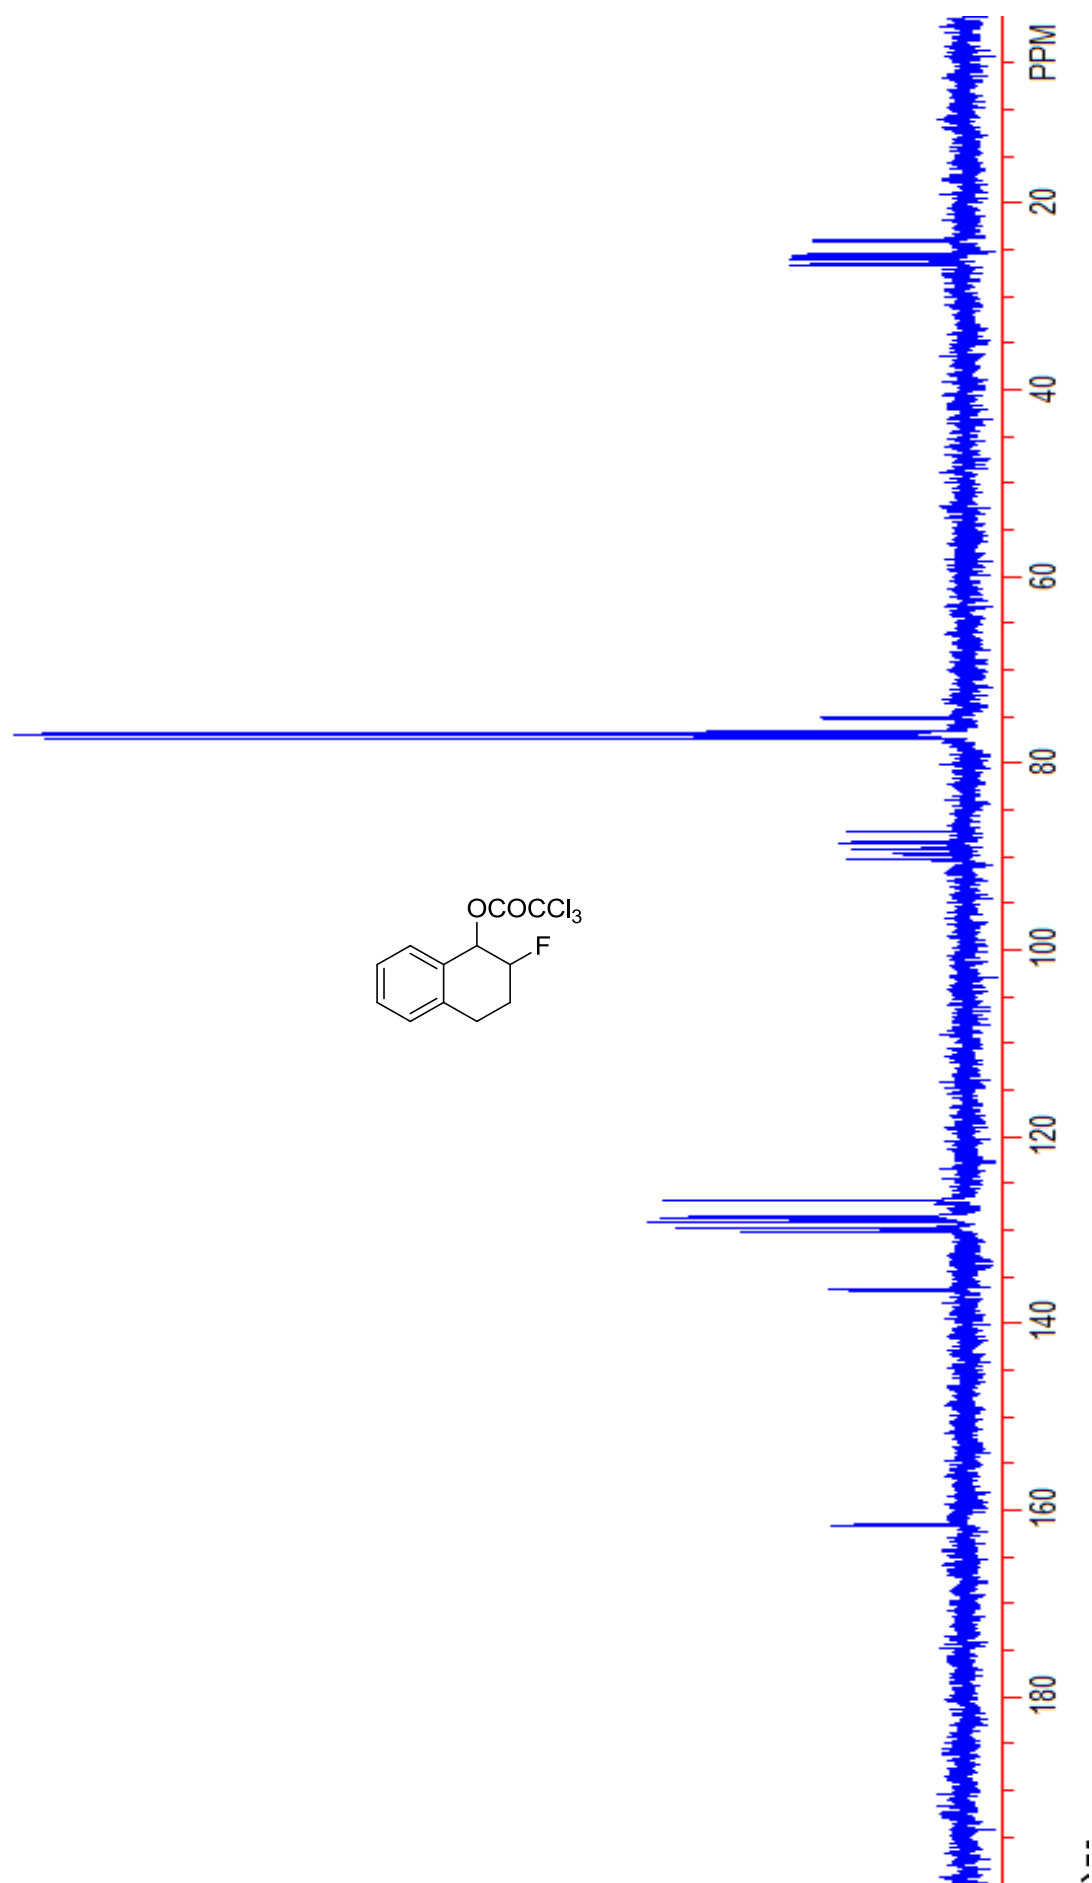

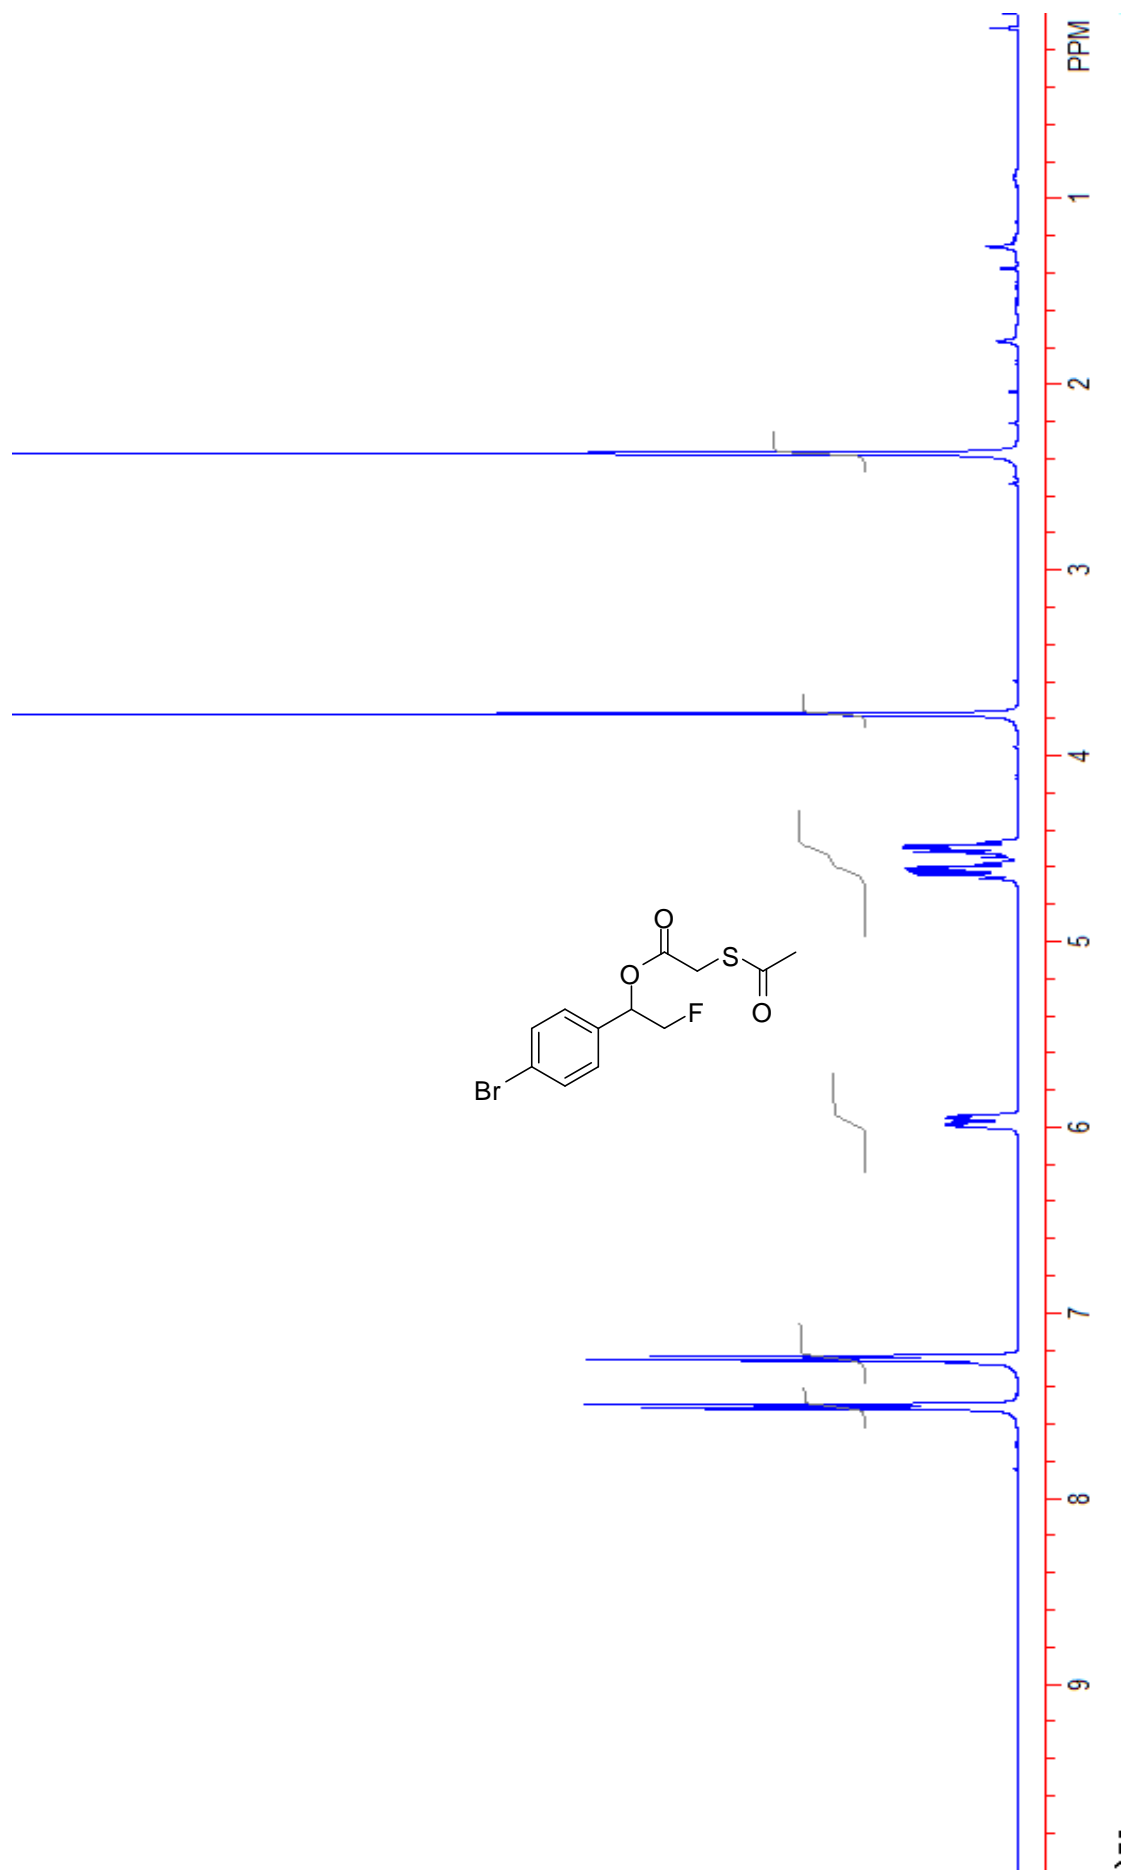

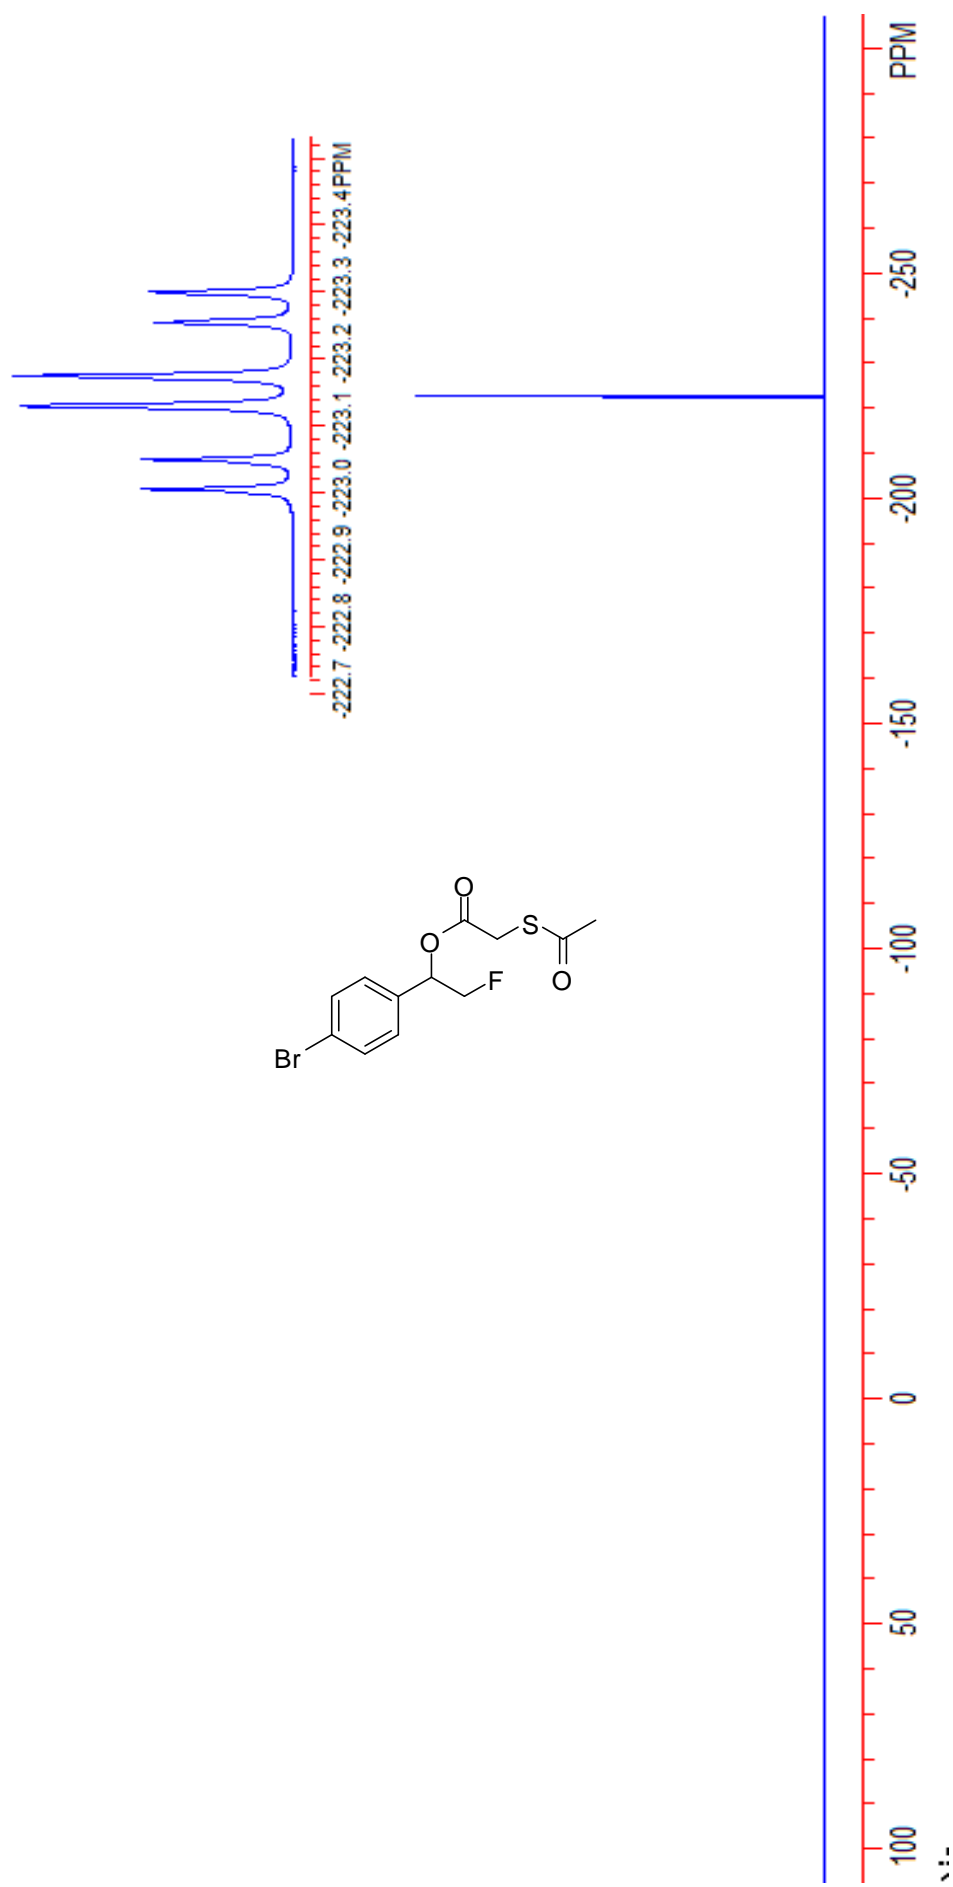

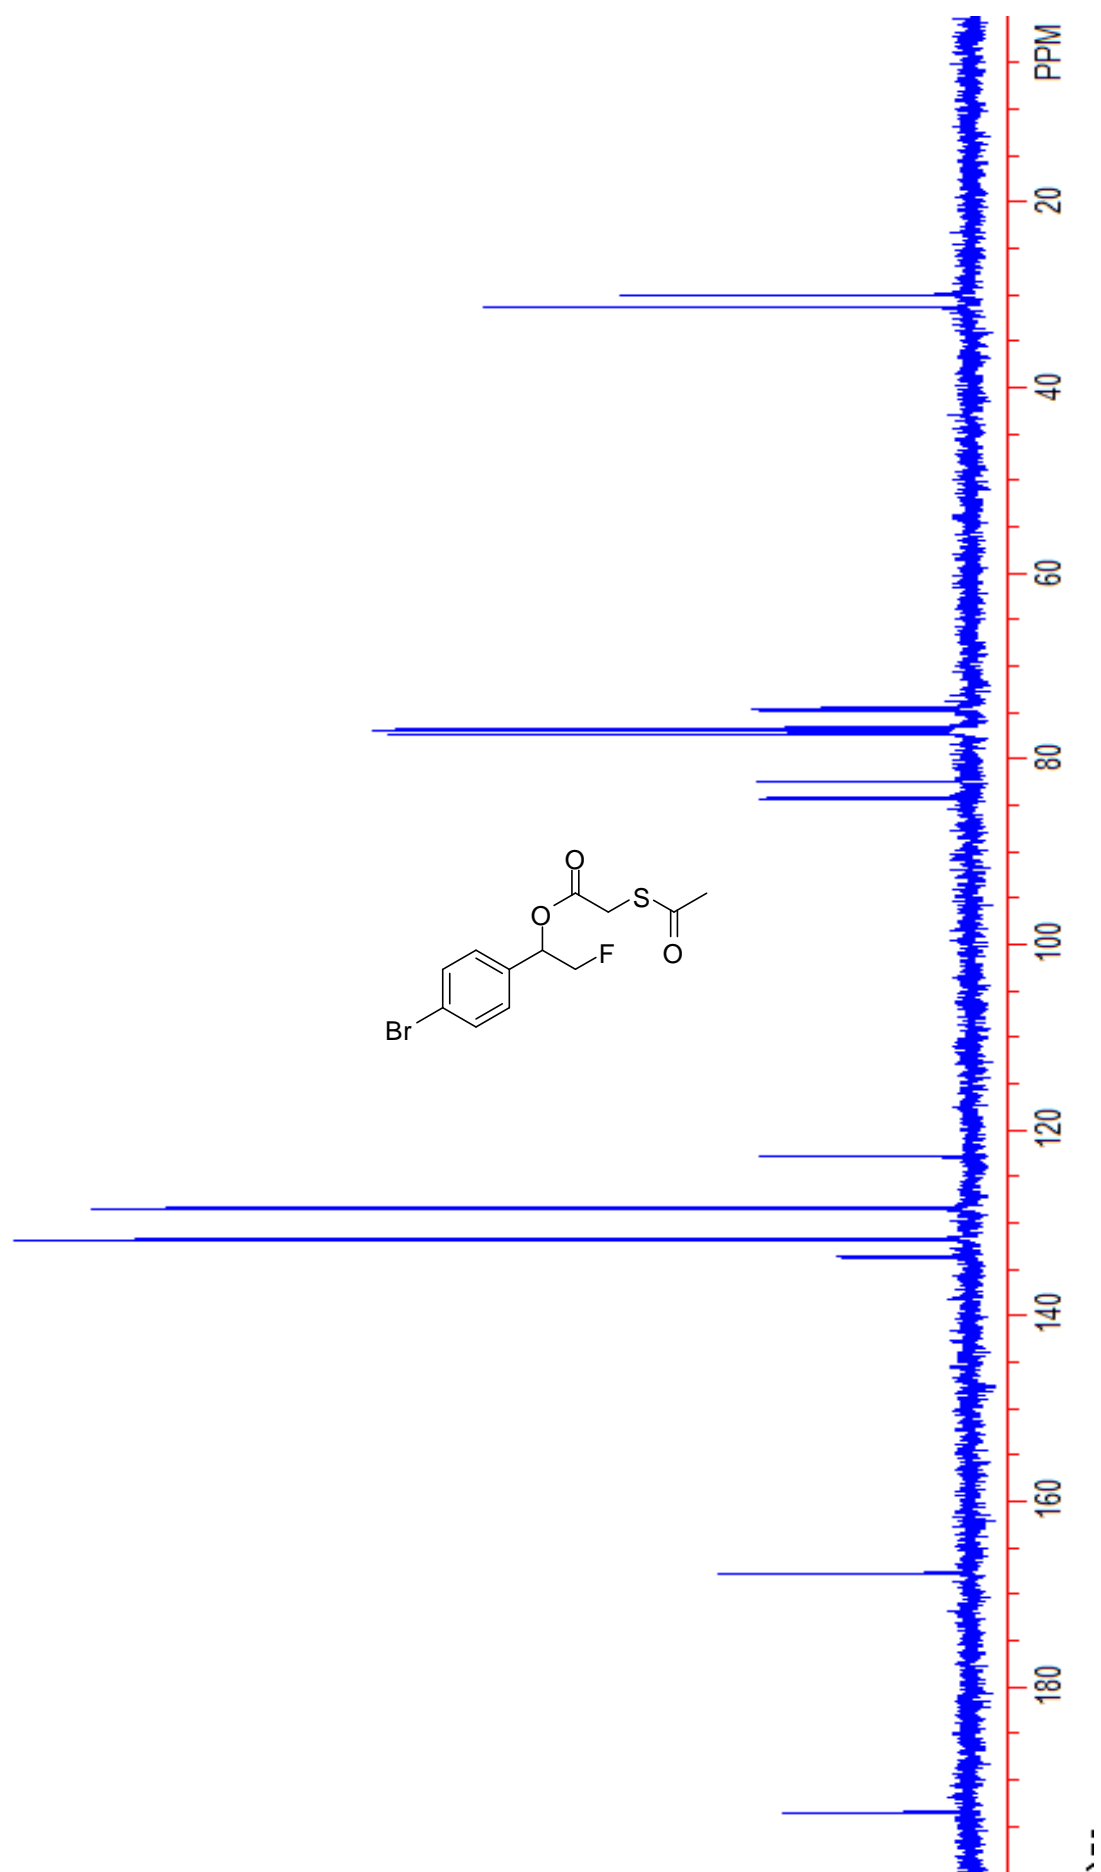

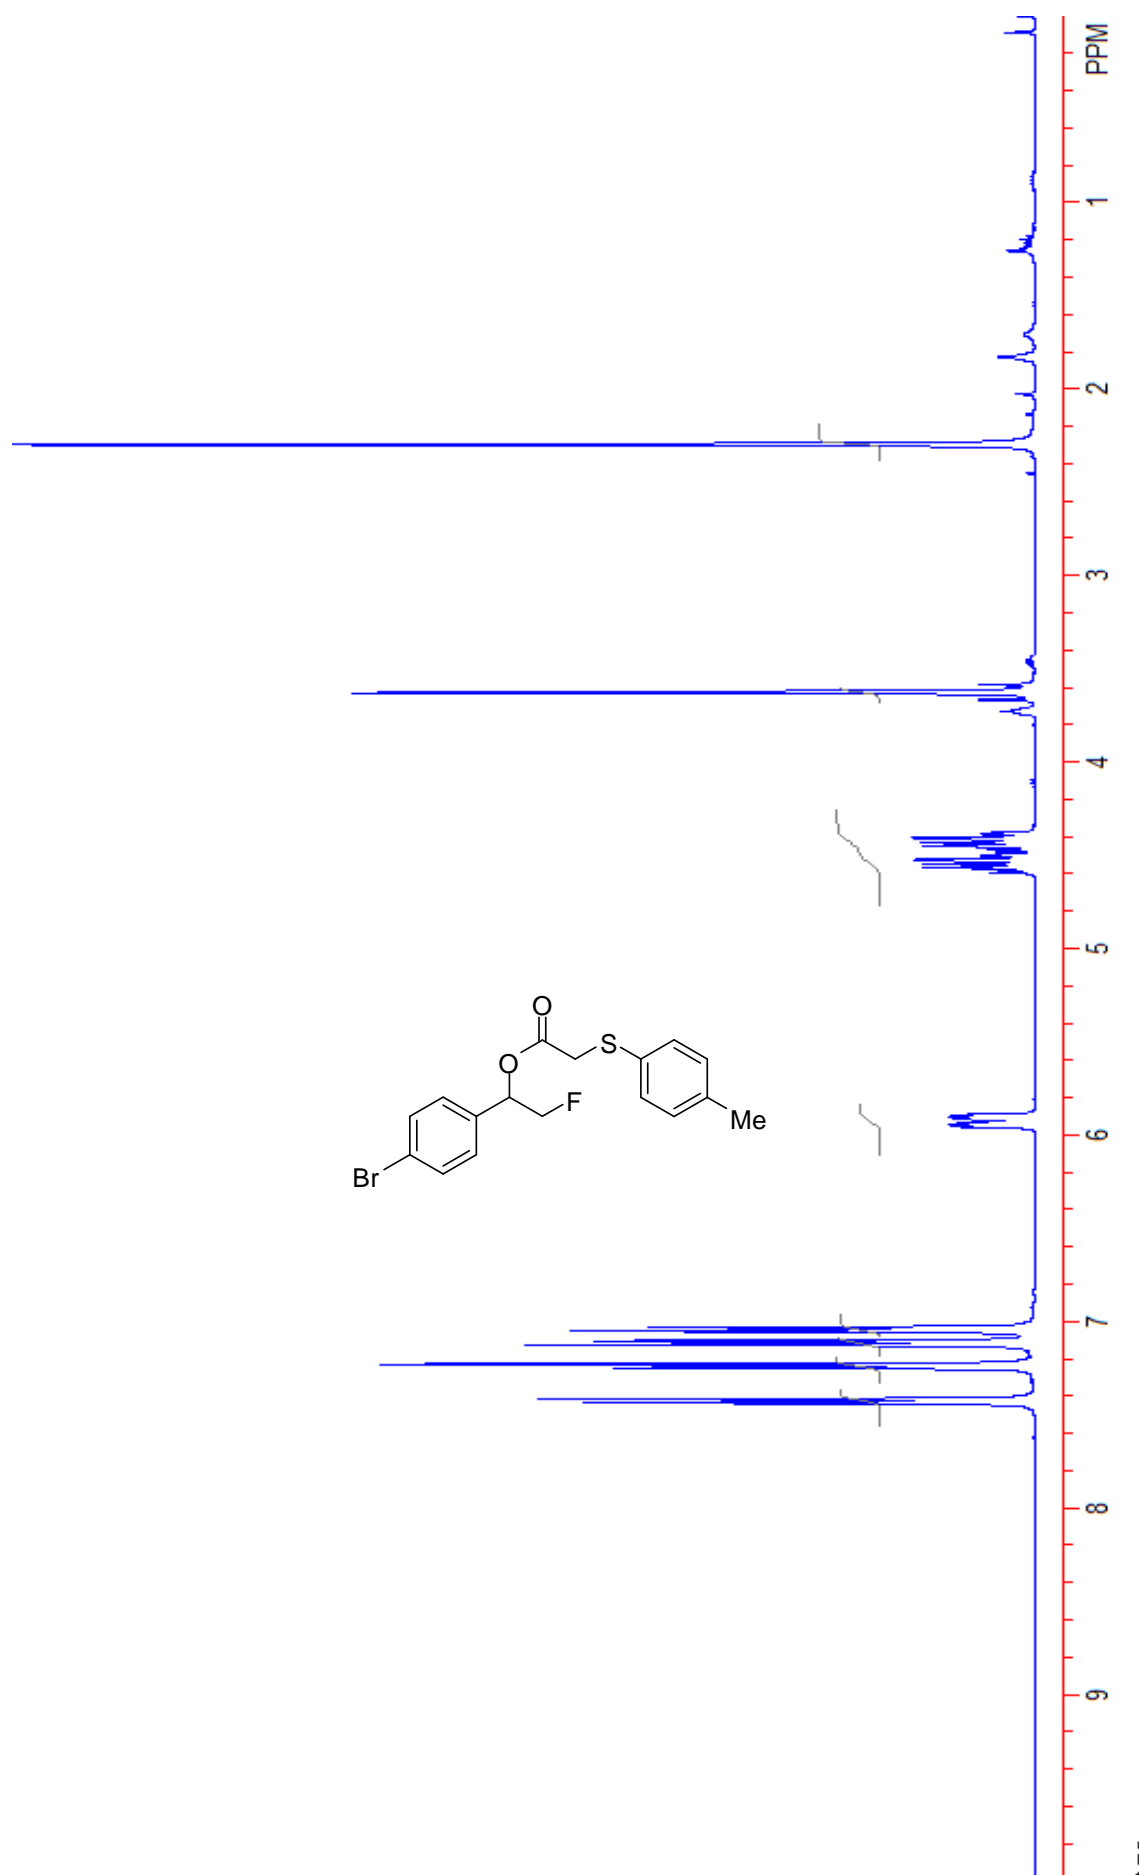

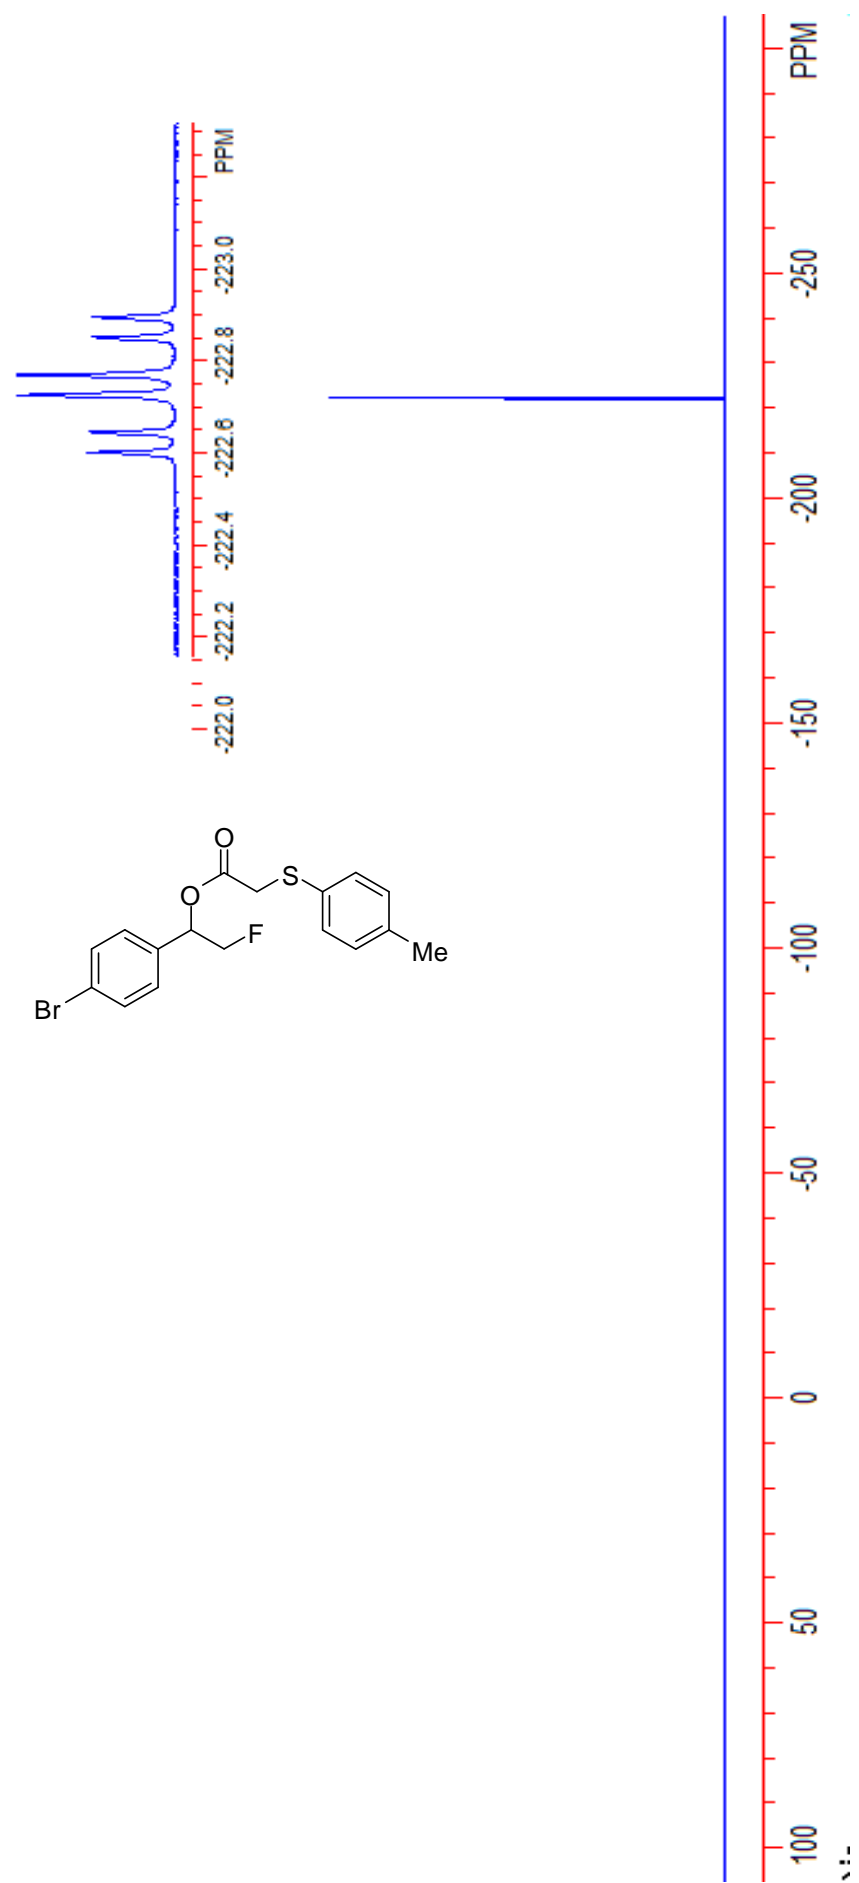

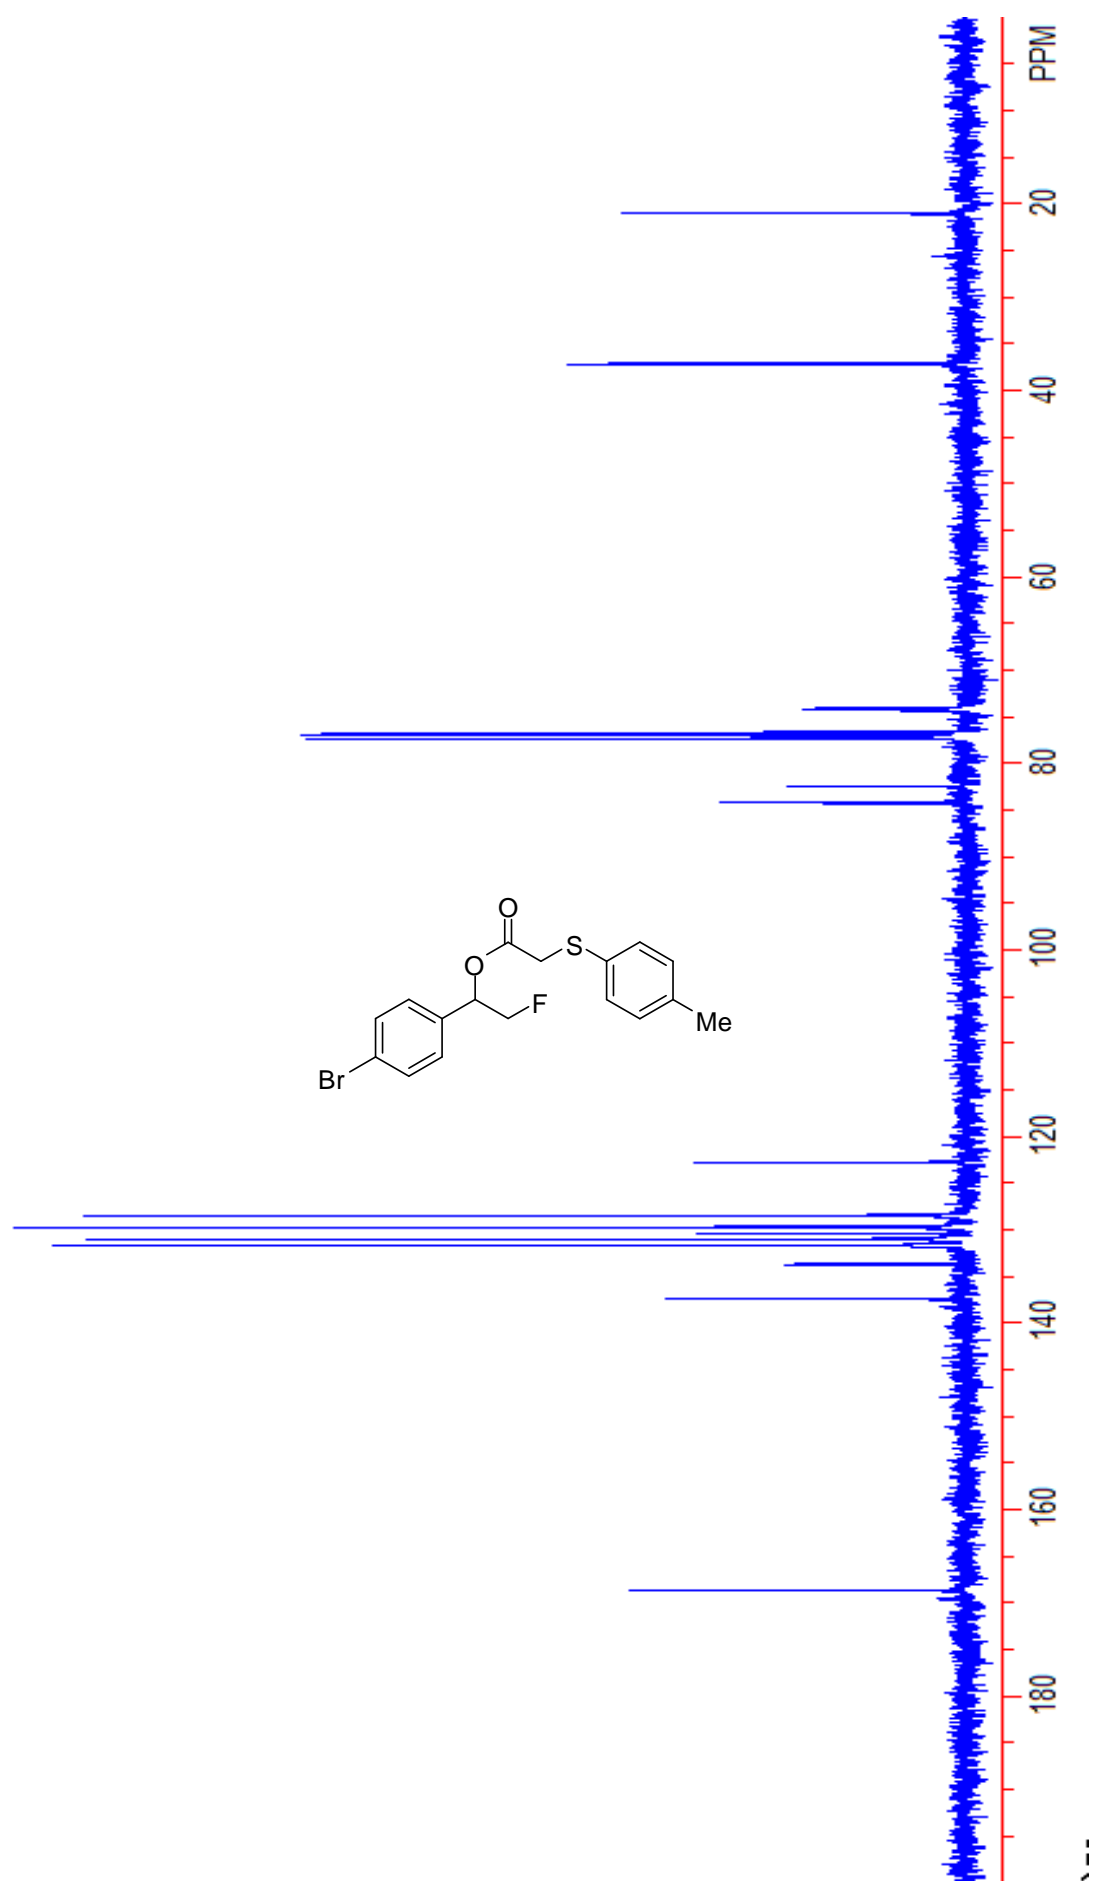



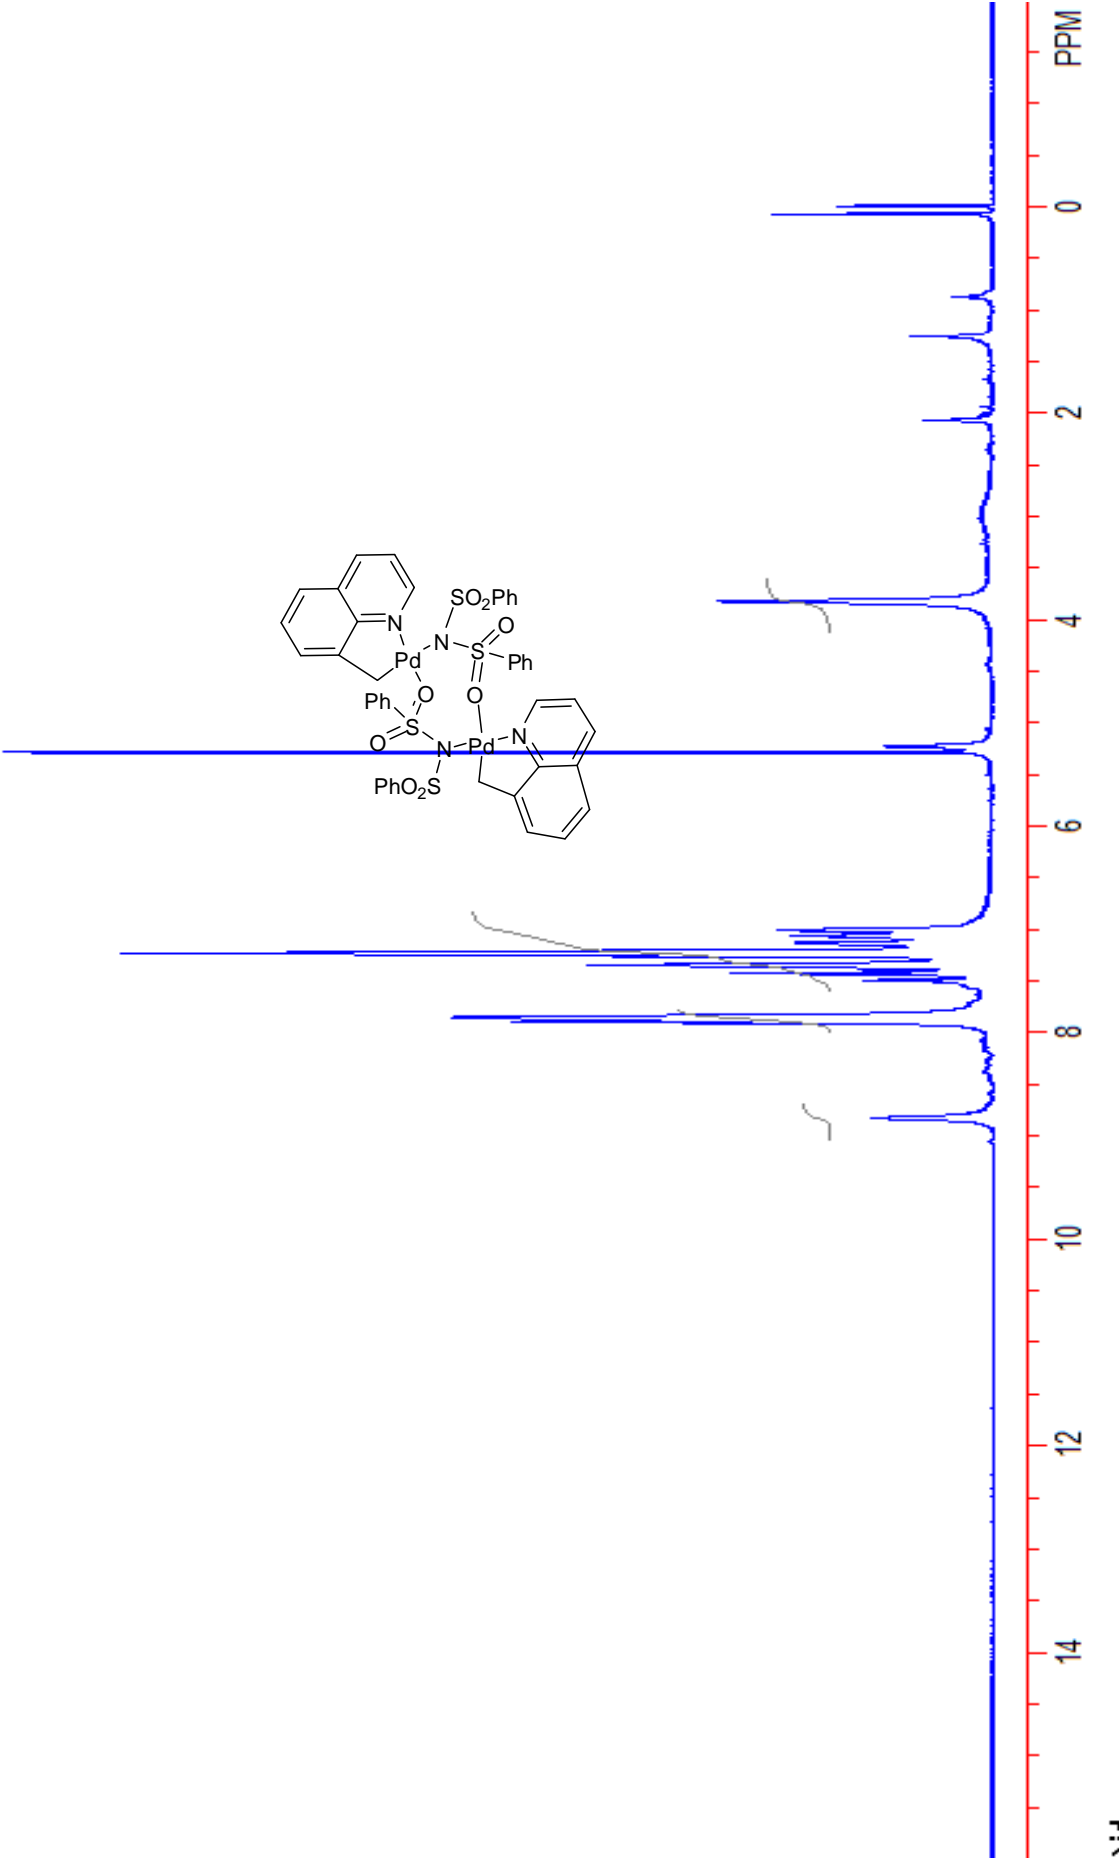

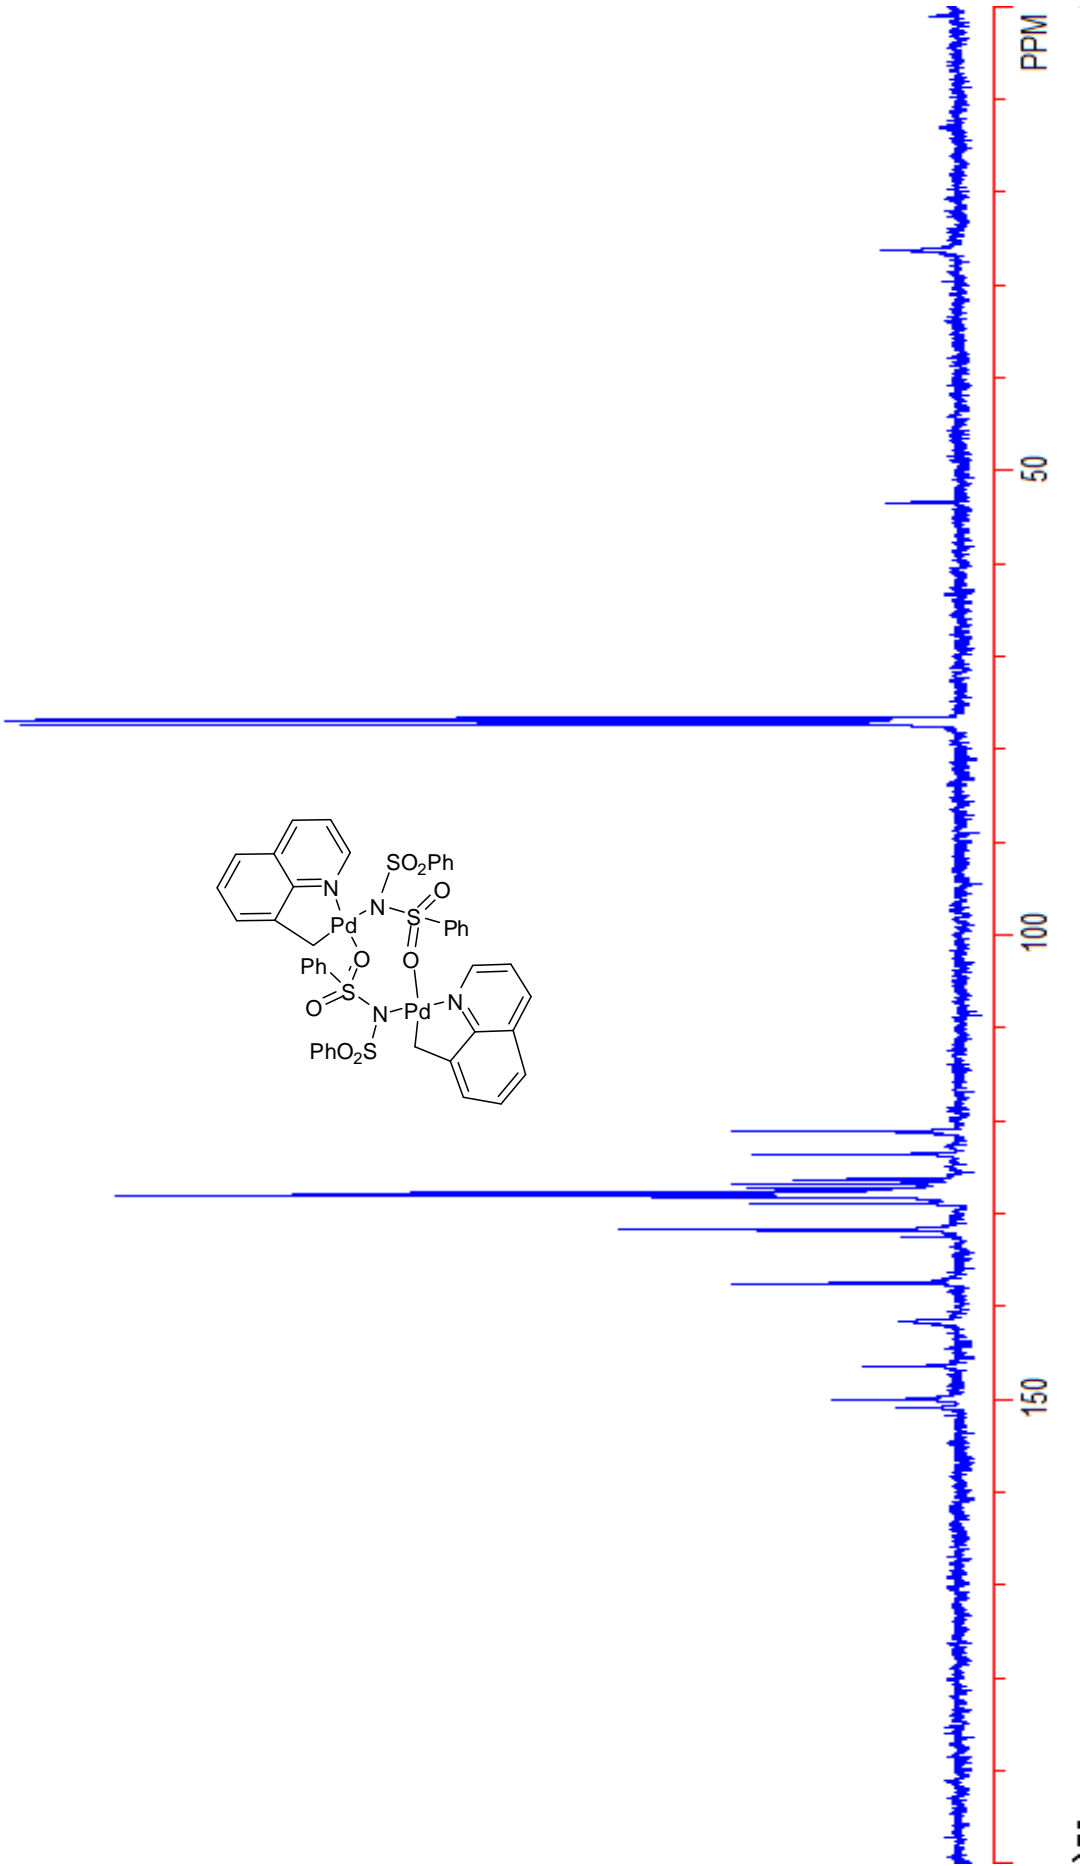

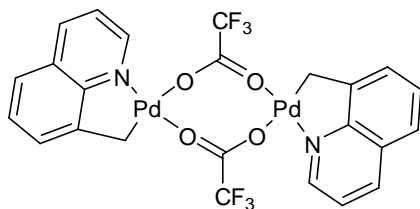

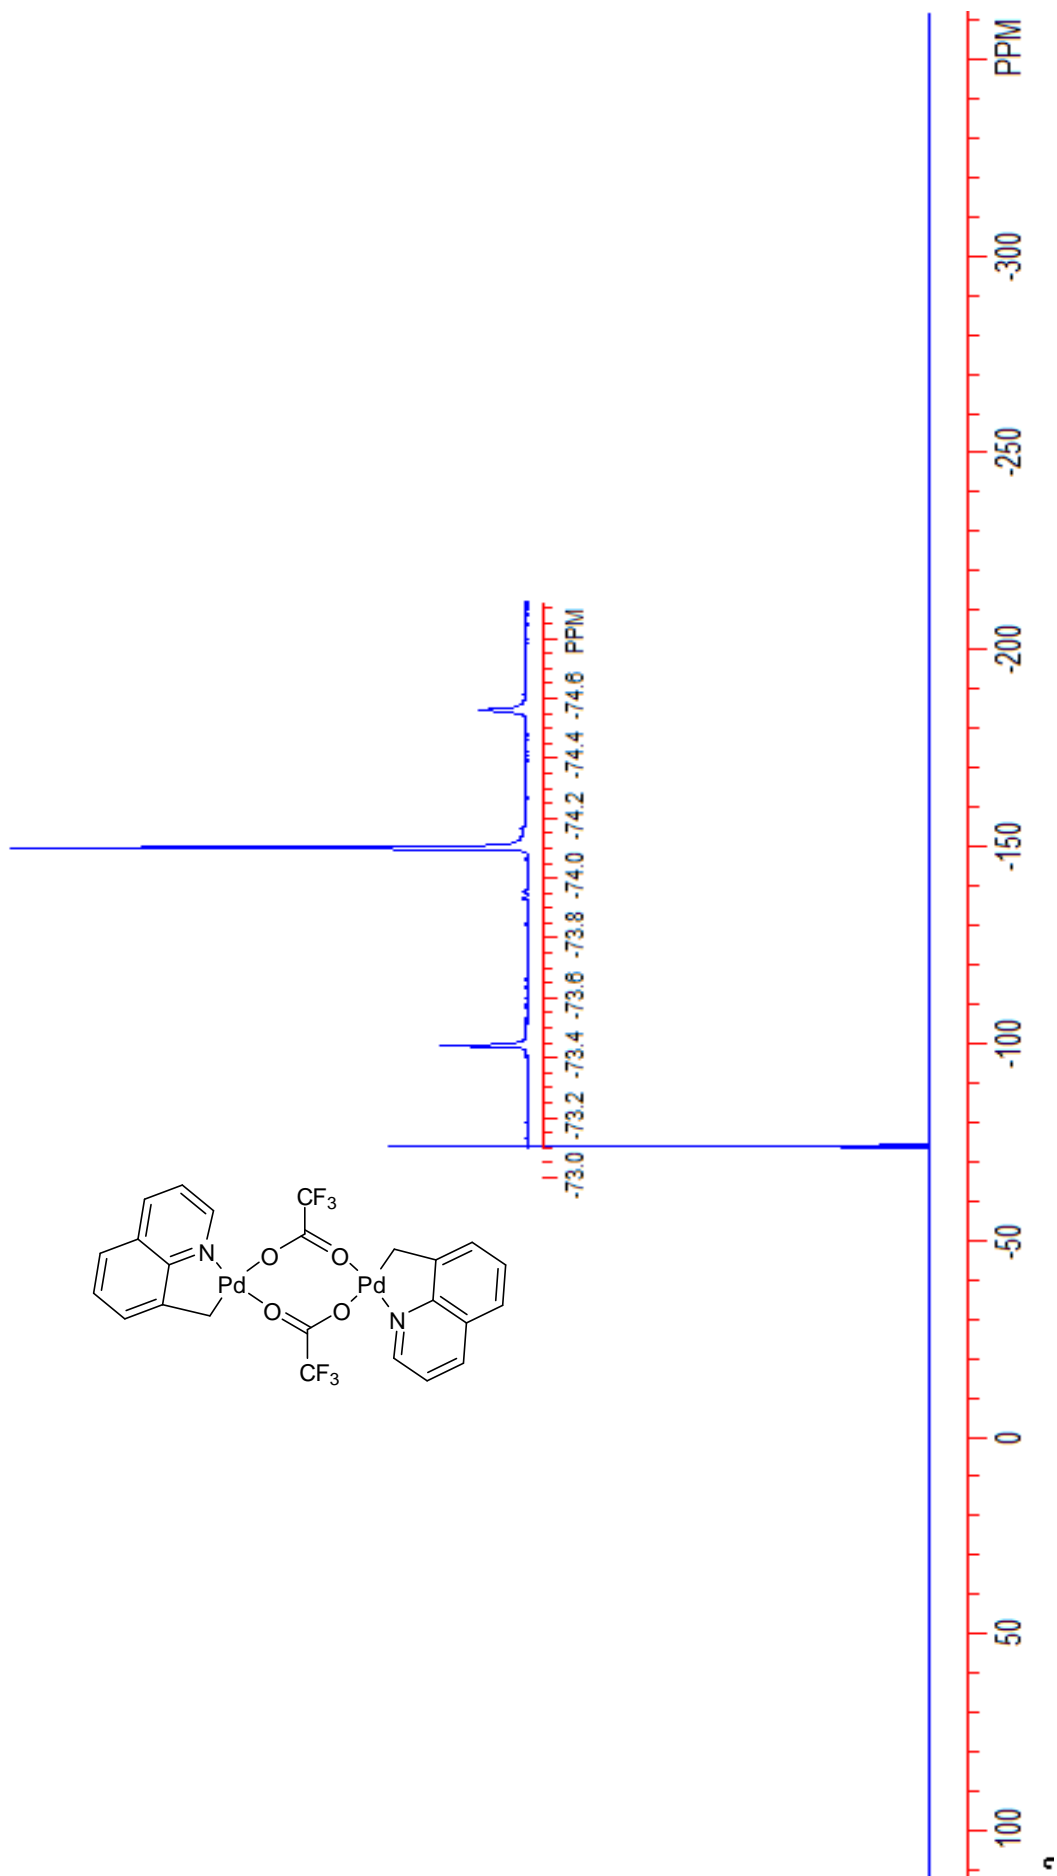

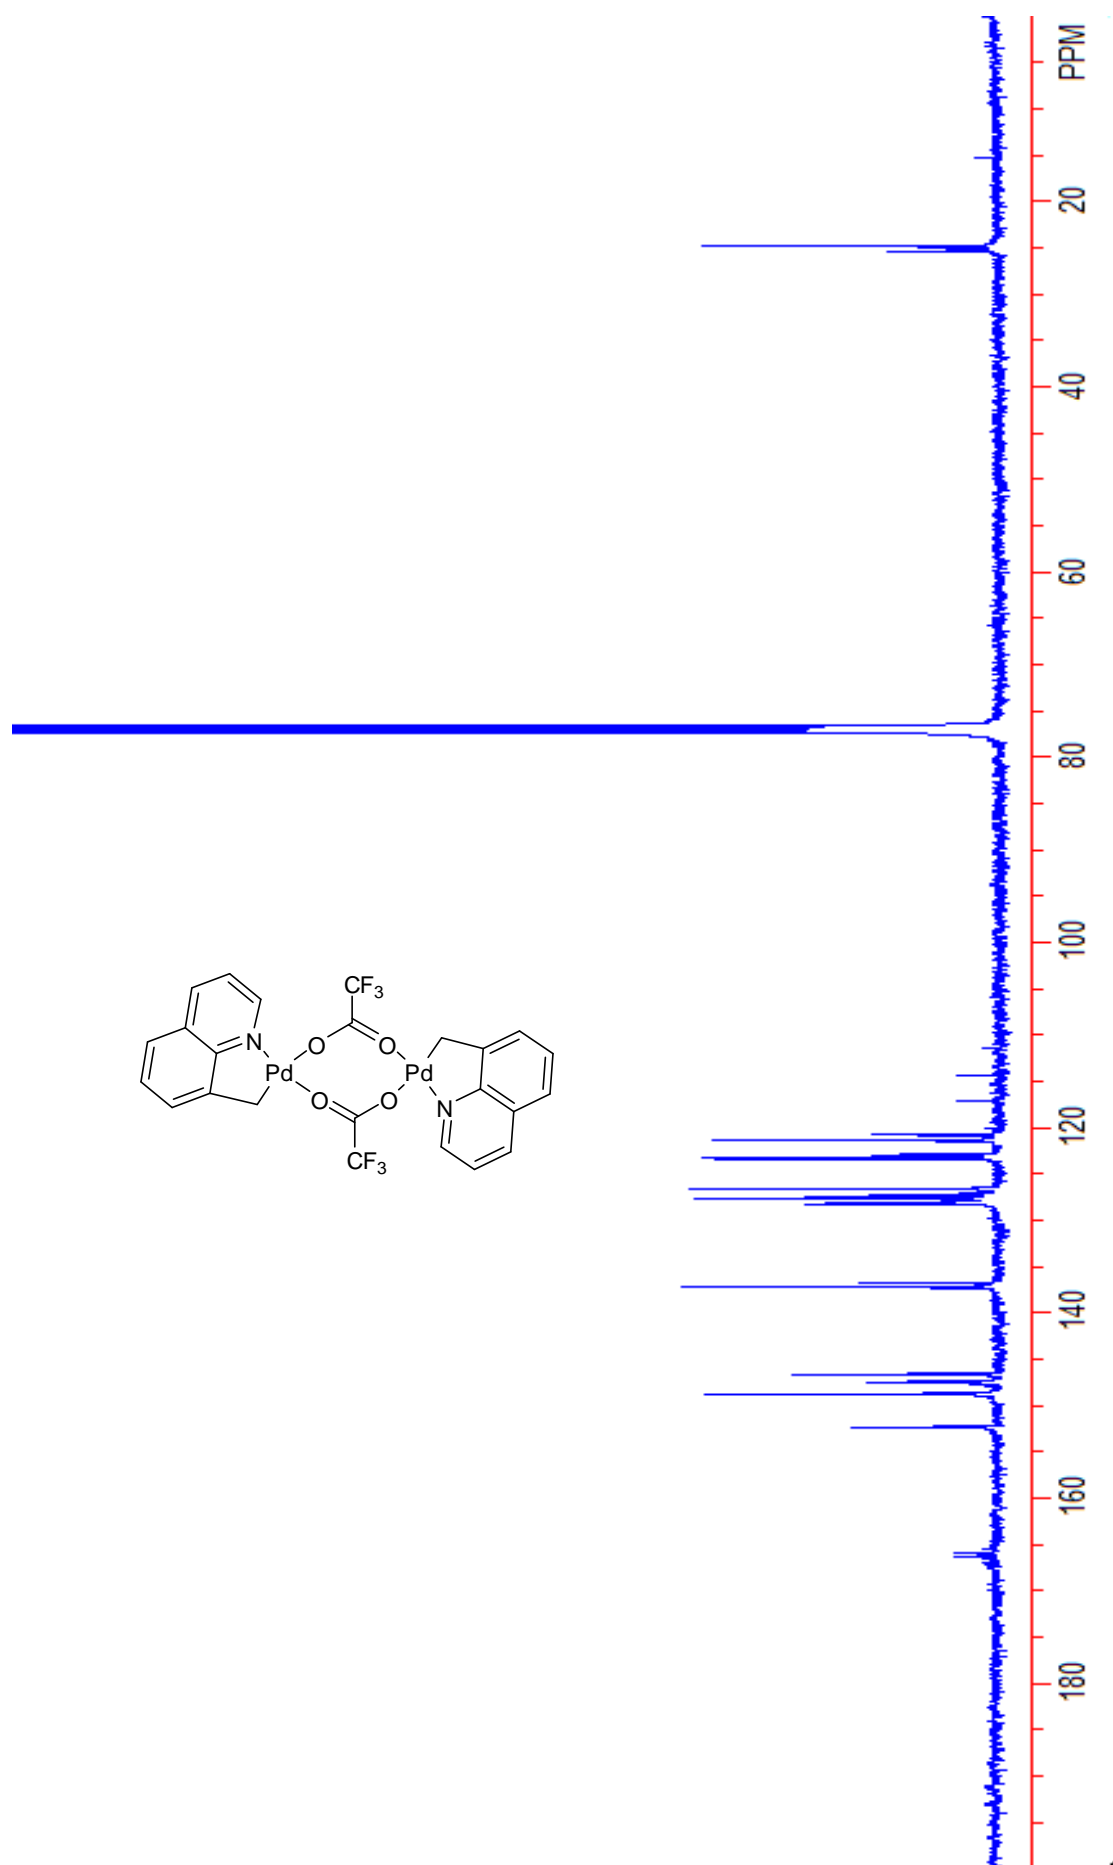

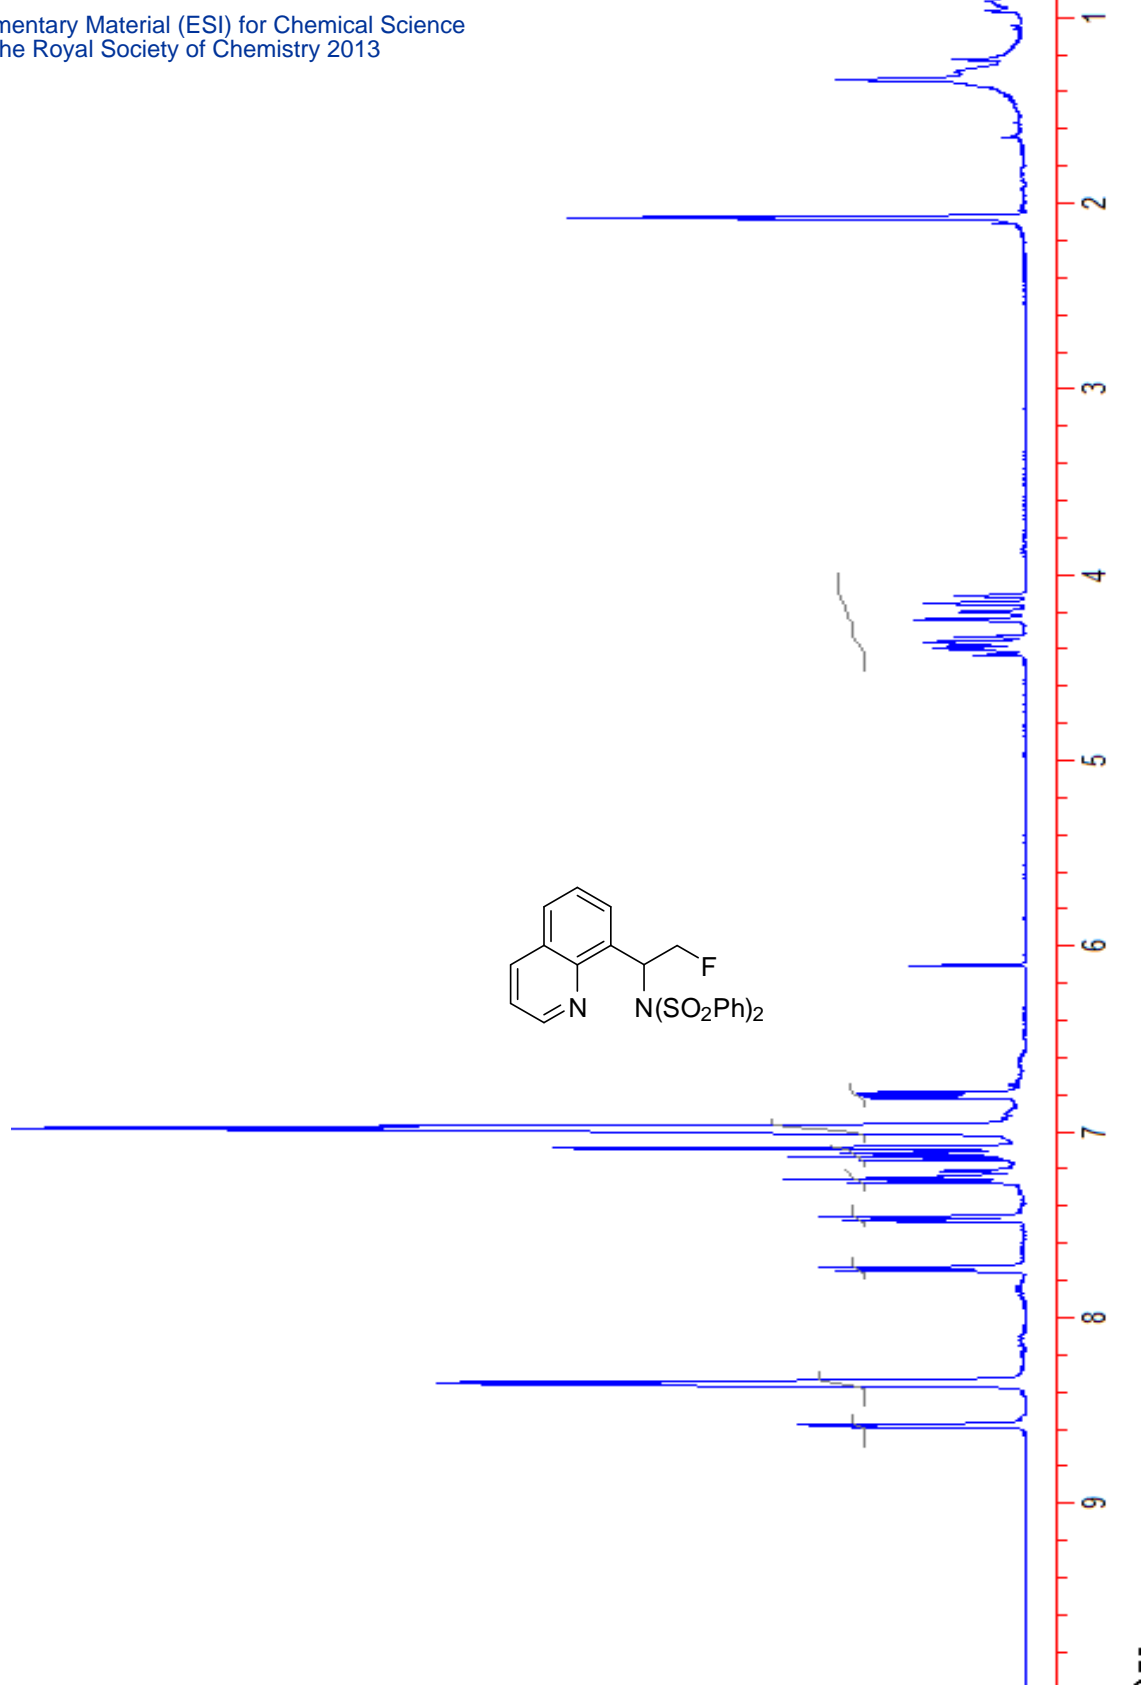

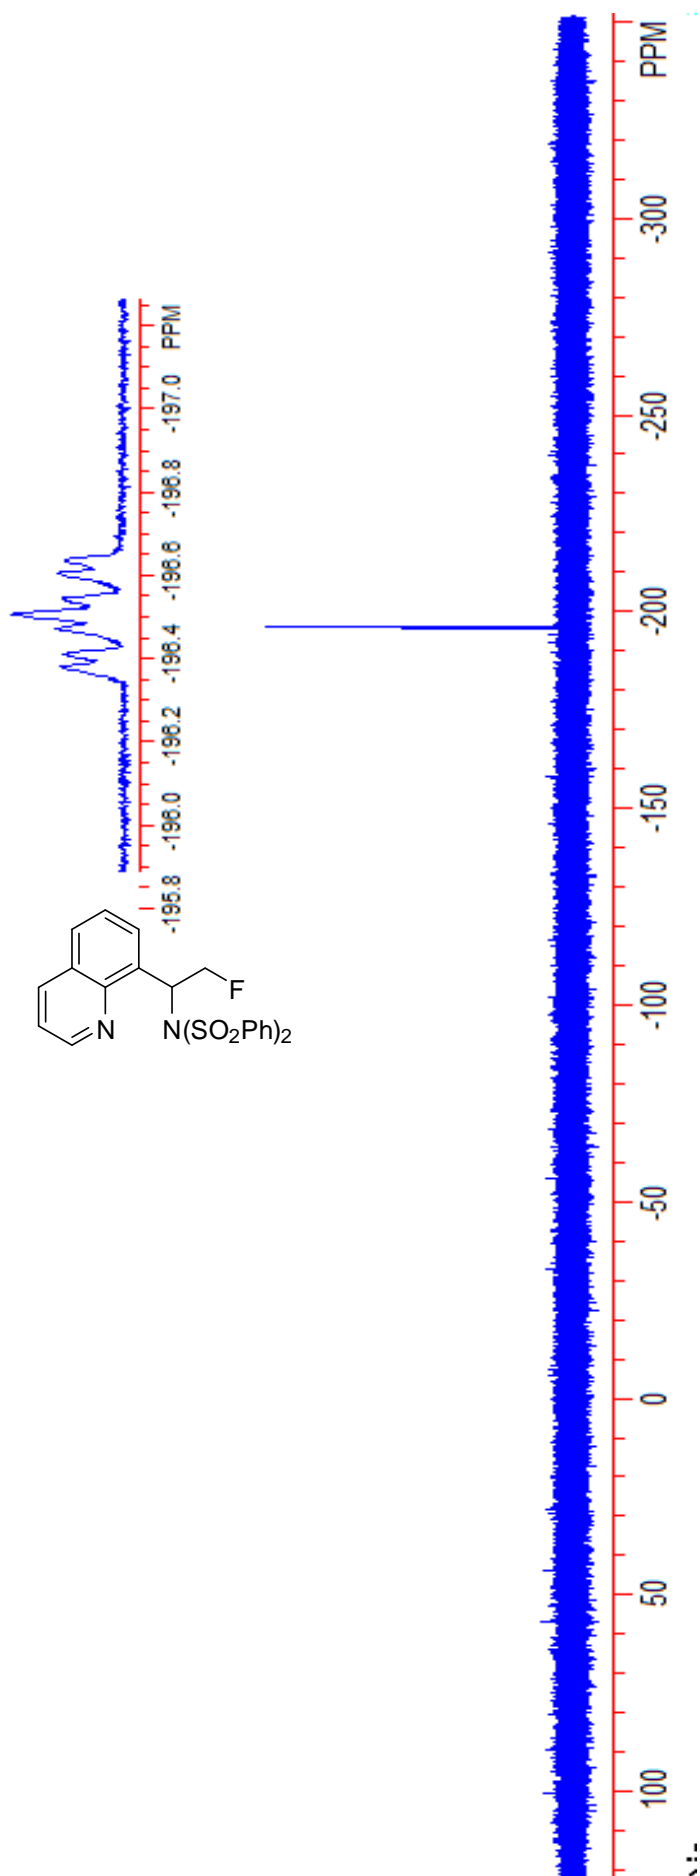

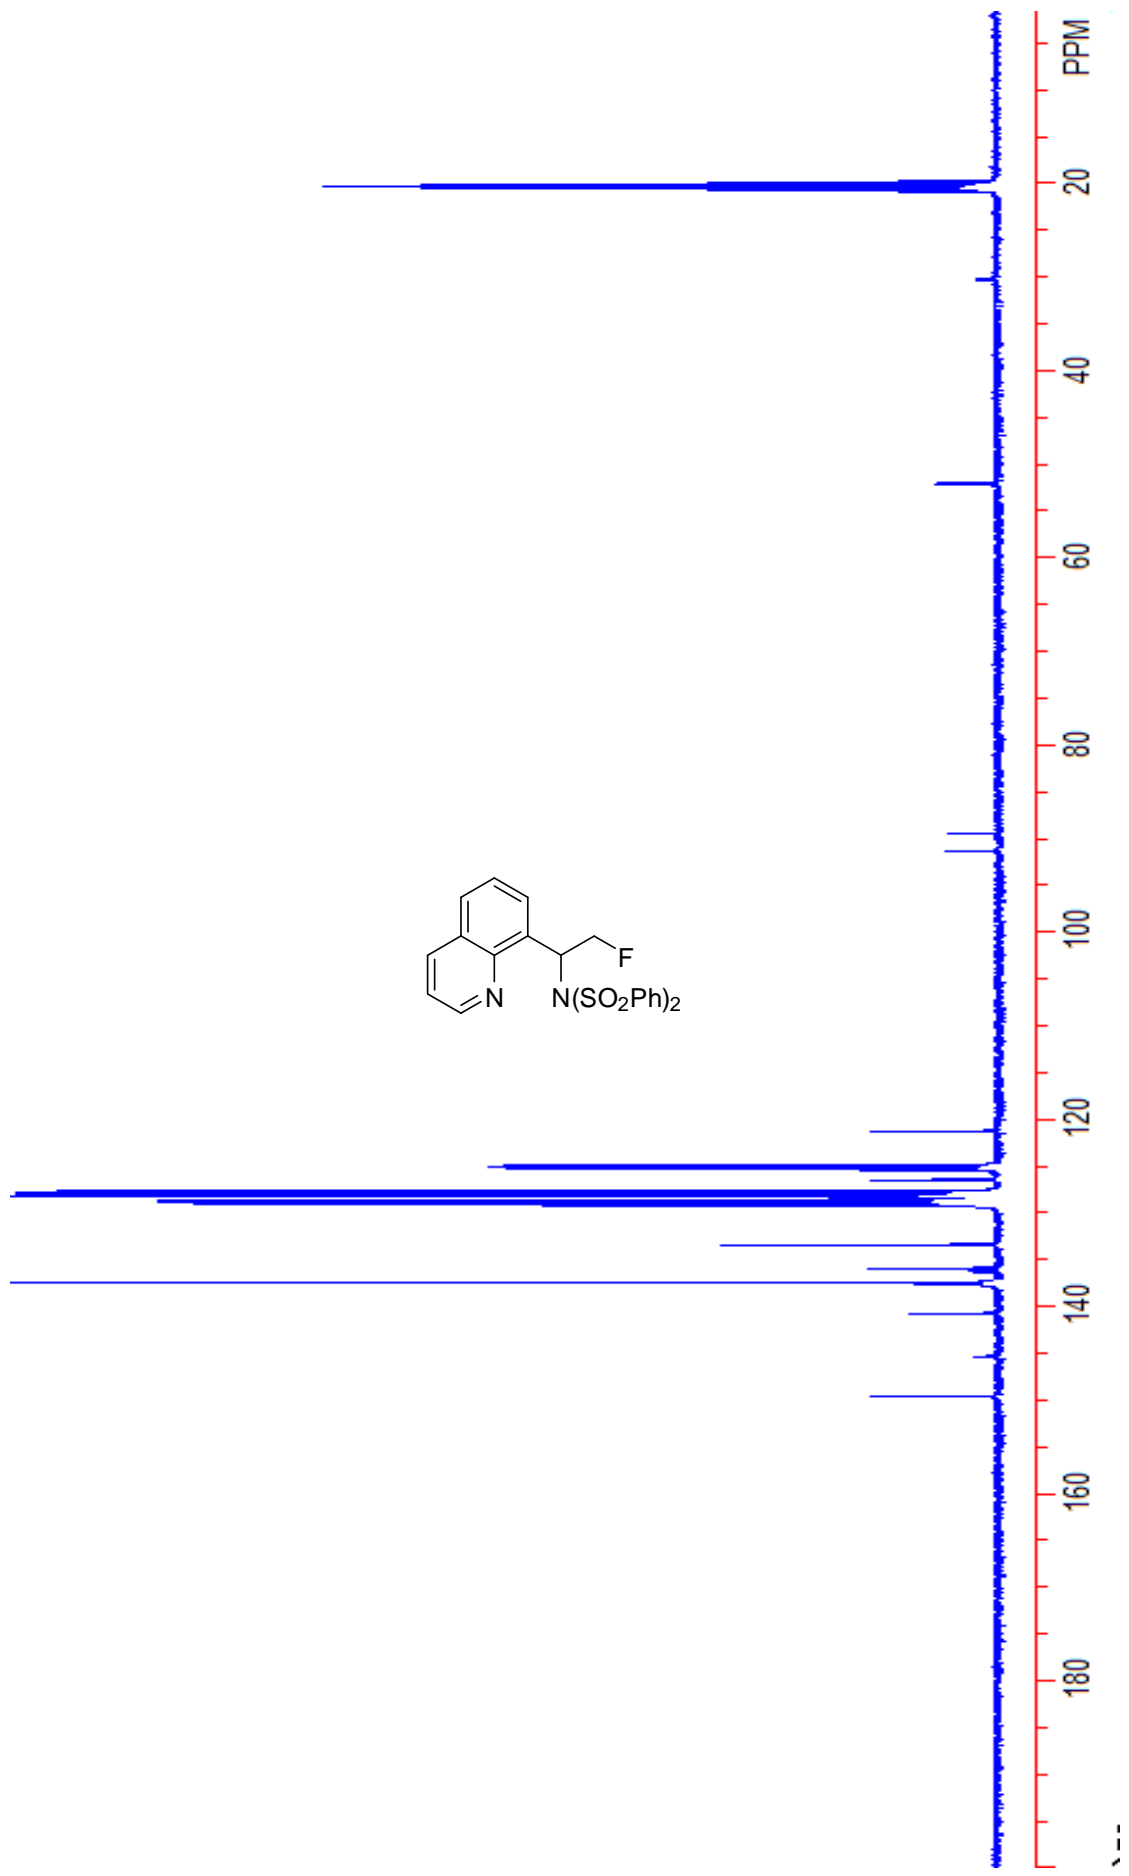

Supplement: c3sc50690h_2.pdf [file c3sc50690h_2.pdf]
